# Supplementary material for: Genome Comparison of Human and Non-Human Malaria Parasites Reveals Species Subset-Specific Genes Potentially Linked to Human Disease
Source: PLoS Comput Biol. 2011 Dec 22;7(12):e1002320. doi: 10.1371/journal.pcbi.1002320 (PMC3245289; doi:10.1371/journal.pcbi.1002320)
Supplement: Figure S4 — Influence of OrthoCluster -ip and -op parameter on the number of identified imperfect synteny blocks between P. falciparum and P. vivax . The graph shows the number of identified imperfect synteny blocks between P. falciparum and P. vivax as a function of allowed in-map mismatches (-ip parameter) and out-map mismatches (-op parameter). After allowing for 10% in-map mismatches and 40% out-map mismatches the number of identified synteny blocks reaches a plateau and does not decrease further. Similar results were observed between P. vivax and P. knowlesi (data not shown). (XLS) [file pcbi.1002320.s008.xls]

## Sheet: Figure S5
	Column Labels
	0	5	10	15	20	25	30	35	40	45	50	55	60	65	70	75	80	(blank)	Grand Total
0	407	244	59	38	33	32	32	32	31	31	31	31	31	31	31	31	31		31
5	406	243	56	34	29	28	28	28	27	27	27	27	27	27	27	27	27		27
10	406	243	56	34	29	28	28	28	27	27	27	27	27	27	27	27	27		27
15	406	243	56	34	29	28	28	28	27	27	27	27	27	27	27	27	27		27
20	406	243	56	34	29	28	28	28	27	27	27	27	27	27	27	27	27		27
25	406	243	56	34	29	28	28	28	27	27	27	27	27	27	27	27	27		27
30	406	243	56	34	29	28	28	28	27	27	27	27	27	27	27	27	27		27
35	406	243	56	34	29	28	28	28	27	27	27	27	27	27	27	27	27		27
40	406	243	56	34	29	28	28	28	27	27	27	27	27	27	27	27	27		27
45	406	243	56	34	29	28	28	28	27	27	27	27	27	27	27	27	27		27
50	406	243	56	34	29	28	28	28	27	27	27	27	27	27	27	27	27		27
55	406	243	56	34	29	28	28	28	27	27	27	27	27	27	27	27	27		27
60	406	243	56	34	29	28	28	28	27	27	27	27	27	27	27	27	27		27
65	406	243	56	34	26	25	25	25	24	24	24	24	24	24	24	24	24		24
70	406	243	56	34	26	25	25	25	24	24	24	24	24	24	24	24	24		24
75	406	243	56	34	26	25	25	25	24	24	24	24	24	24	24	24	24		24
80	406	243	56	34	26	25	25	25	24	24	24	24	24	24	24	24	24		24
(blank)
Grand Total	406	243	56	34	26	25	25	25	24	24	24	24	24	24	24	24	24		24

## Sheet: Datapoints Figure S5
commandLineParameters	maxInMapMM	maxOutMapMM	totalNumberOfBlocks	g1LargestBlockSize	g2LargestBlockSize	g1InMapMM	g1OutMapMM	g2InMapMM	g2OutMapMM	g1AverageBlockSize	g2AverageBlockSize	2010-01-10	2010-11-20	21-30	31-40	41-50	51-60	61-70	71-80	81-90	91-100	101-110	111-120	121-130	131-140	141-150	151-160	161-170	171-180	181-190	>=191
-m /home/cfa24/research/orthocluster_analysis/out/mapping_pfal_pviv_60.txt -g1 /home/cfa24/research/orthocluster_analysis/out/genome_pfal_60.txt -g2 /home/cfa24/research/orthocluster_analysis/out/genome_pviv_60.txt -d /home/cfa24/research/orthocluster_ana	0	0	407	50	50	0	0	0	0	10.4717	10.4717	255	1322	107	1625	29	704	12	422	4	189	0	0	0	0	0	0	0	0	0	0	0	0	0	0	0	0	0	0	0	0	0	0	0	0	0	0	0	0
-m /home/cfa24/research/orthocluster_analysis/out/mapping_pfal_pviv_60.txt -g1 /home/cfa24/research/orthocluster_analysis/out/genome_pfal_60.txt -g2 /home/cfa24/research/orthocluster_analysis/out/genome_pviv_60.txt -d /home/cfa24/research/orthocluster_ana	0	5	244	166	163	0	135	0	112	18.0943	18	151	719	27	410	28	679	8	263	8	368	1	59	5	313	3	227	3	249	2	183	5	520	1	113	0	0	0	0	1	146	0	0	1	166	0	0	0	0
-m /home/cfa24/research/orthocluster_analysis/out/mapping_pfal_pviv_60.txt -g1 /home/cfa24/research/orthocluster_analysis/out/genome_pfal_60.txt -g2 /home/cfa24/research/orthocluster_analysis/out/genome_pviv_60.txt -d /home/cfa24/research/orthocluster_ana	0	10	59	427	418	0	364	0	304	79.2034	78.1864	20	100	8	113	5	127	2	67	4	177	1	53	2	129	0	0	0	0	0	0	1	106	0	0	2	248	0	0	3	430	0	0	2	330	0	0	0	0
-m /home/cfa24/research/orthocluster_analysis/out/mapping_pfal_pviv_60.txt -g1 /home/cfa24/research/orthocluster_analysis/out/genome_pfal_60.txt -g2 /home/cfa24/research/orthocluster_analysis/out/genome_pviv_60.txt -d /home/cfa24/research/orthocluster_ana	0	15	38	439	428	0	398	0	343	124.026	122.579	5	19	4	61	3	69	0	0	3	128	0	0	3	197	0	0	2	176	1	93	1	106	0	0	2	248	0	0	2	290	0	0	2	330	1	174	0	0
-m /home/cfa24/research/orthocluster_analysis/out/mapping_pfal_pviv_60.txt -g1 /home/cfa24/research/orthocluster_analysis/out/genome_pfal_60.txt -g2 /home/cfa24/research/orthocluster_analysis/out/genome_pviv_60.txt -d /home/cfa24/research/orthocluster_ana	0	20	33	439	428	0	415	0	358	143.455	141.727	2	7	2	36	3	69	0	0	1	43	1	57	3	196	0	0	3	263	1	93	1	106	0	0	2	248	0	0	2	290	0	0	2	330	1	174	0	0
-m /home/cfa24/research/orthocluster_analysis/out/mapping_pfal_pviv_60.txt -g1 /home/cfa24/research/orthocluster_analysis/out/genome_pfal_60.txt -g2 /home/cfa24/research/orthocluster_analysis/out/genome_pviv_60.txt -d /home/cfa24/research/orthocluster_ana	0	25	32	439	428	0	418	0	362	148.094	146.344	1	5	2	36	3	69	0	0	1	43	1	59	2	129	1	72	3	263	1	93	1	106	0	0	2	248	0	0	2	290	0	0	2	330	1	174	0	0
-m /home/cfa24/research/orthocluster_analysis/out/mapping_pfal_pviv_60.txt -g1 /home/cfa24/research/orthocluster_analysis/out/genome_pfal_60.txt -g2 /home/cfa24/research/orthocluster_analysis/out/genome_pviv_60.txt -d /home/cfa24/research/orthocluster_ana	0	30	32	439	428	0	418	0	362	148.094	146.344	1	5	2	36	3	69	0	0	1	43	1	59	2	129	1	72	3	263	1	93	1	106	0	0	2	248	0	0	2	290	0	0	2	330	1	174	0	0
-m /home/cfa24/research/orthocluster_analysis/out/mapping_pfal_pviv_60.txt -g1 /home/cfa24/research/orthocluster_analysis/out/genome_pfal_60.txt -g2 /home/cfa24/research/orthocluster_analysis/out/genome_pviv_60.txt -d /home/cfa24/research/orthocluster_ana	0	35	32	439	428	0	418	0	391	148.094	147.25	2	8	2	36	2	44	0	0	1	43	1	59	2	129	0	0	3	263	2	187	1	106	0	0	2	248	0	0	2	290	0	0	2	330	1	174	0	0
-m /home/cfa24/research/orthocluster_analysis/out/mapping_pfal_pviv_60.txt -g1 /home/cfa24/research/orthocluster_analysis/out/genome_pfal_60.txt -g2 /home/cfa24/research/orthocluster_analysis/out/genome_pviv_60.txt -d /home/cfa24/research/orthocluster_ana	0	40	31	439	428	0	420	0	393	152.935	152.065	1	5	2	36	2	44	0	0	1	43	1	59	2	129	0	0	3	263	2	192	1	106	0	0	2	248	0	0	2	290	0	0	2	330	1	174	0	0
-m /home/cfa24/research/orthocluster_analysis/out/mapping_pfal_pviv_60.txt -g1 /home/cfa24/research/orthocluster_analysis/out/genome_pfal_60.txt -g2 /home/cfa24/research/orthocluster_analysis/out/genome_pviv_60.txt -d /home/cfa24/research/orthocluster_ana	0	45	31	439	428	0	420	0	393	152.935	152.065	1	5	2	36	2	44	0	0	1	43	1	59	2	129	0	0	3	263	2	192	1	106	0	0	2	248	0	0	2	290	0	0	2	330	1	174	0	0
-m /home/cfa24/research/orthocluster_analysis/out/mapping_pfal_pviv_60.txt -g1 /home/cfa24/research/orthocluster_analysis/out/genome_pfal_60.txt -g2 /home/cfa24/research/orthocluster_analysis/out/genome_pviv_60.txt -d /home/cfa24/research/orthocluster_ana	0	50	31	439	428	0	420	0	393	152.935	152.065	1	5	2	36	2	44	0	0	1	43	1	59	2	129	0	0	3	263	2	192	1	106	0	0	2	248	0	0	2	290	0	0	2	330	1	174	0	0
-m /home/cfa24/research/orthocluster_analysis/out/mapping_pfal_pviv_60.txt -g1 /home/cfa24/research/orthocluster_analysis/out/genome_pfal_60.txt -g2 /home/cfa24/research/orthocluster_analysis/out/genome_pviv_60.txt -d /home/cfa24/research/orthocluster_ana	0	55	31	439	428	0	420	0	393	152.935	152.065	1	5	2	36	2	44	0	0	1	43	1	59	2	129	0	0	3	263	2	192	1	106	0	0	2	248	0	0	2	290	0	0	2	330	1	174	0	0
-m /home/cfa24/research/orthocluster_analysis/out/mapping_pfal_pviv_60.txt -g1 /home/cfa24/research/orthocluster_analysis/out/genome_pfal_60.txt -g2 /home/cfa24/research/orthocluster_analysis/out/genome_pviv_60.txt -d /home/cfa24/research/orthocluster_ana	0	60	31	439	428	0	420	0	393	152.935	152.065	1	5	2	36	2	44	0	0	1	43	1	59	2	129	0	0	3	263	2	192	1	106	0	0	2	248	0	0	2	290	0	0	2	330	1	174	0	0
-m /home/cfa24/research/orthocluster_analysis/out/mapping_pfal_pviv_60.txt -g1 /home/cfa24/research/orthocluster_analysis/out/genome_pfal_60.txt -g2 /home/cfa24/research/orthocluster_analysis/out/genome_pviv_60.txt -d /home/cfa24/research/orthocluster_ana	0	65	31	439	428	0	420	0	393	152.935	152.065	1	5	2	36	2	44	0	0	1	43	1	59	2	129	0	0	3	263	2	192	1	106	0	0	2	248	0	0	2	290	0	0	2	330	1	174	0	0
-m /home/cfa24/research/orthocluster_analysis/out/mapping_pfal_pviv_60.txt -g1 /home/cfa24/research/orthocluster_analysis/out/genome_pfal_60.txt -g2 /home/cfa24/research/orthocluster_analysis/out/genome_pviv_60.txt -d /home/cfa24/research/orthocluster_ana	0	70	31	439	428	0	420	0	393	152.935	152.065	1	5	2	36	2	44	0	0	1	43	1	59	2	129	0	0	3	263	2	192	1	106	0	0	2	248	0	0	2	290	0	0	2	330	1	174	0	0
-m /home/cfa24/research/orthocluster_analysis/out/mapping_pfal_pviv_60.txt -g1 /home/cfa24/research/orthocluster_analysis/out/genome_pfal_60.txt -g2 /home/cfa24/research/orthocluster_analysis/out/genome_pviv_60.txt -d /home/cfa24/research/orthocluster_ana	0	75	31	439	428	0	420	0	393	152.935	152.065	1	5	2	36	2	44	0	0	1	43	1	59	2	129	0	0	3	263	2	192	1	106	0	0	2	248	0	0	2	290	0	0	2	330	1	174	0	0
-m /home/cfa24/research/orthocluster_analysis/out/mapping_pfal_pviv_60.txt -g1 /home/cfa24/research/orthocluster_analysis/out/genome_pfal_60.txt -g2 /home/cfa24/research/orthocluster_analysis/out/genome_pviv_60.txt -d /home/cfa24/research/orthocluster_ana	0	80	31	439	428	0	420	0	393	152.935	152.065	1	5	2	36	2	44	0	0	1	43	1	59	2	129	0	0	3	263	2	192	1	106	0	0	2	248	0	0	2	290	0	0	2	330	1	174	0	0
-m /home/cfa24/research/orthocluster_analysis/out/mapping_pfal_pviv_60.txt -g1 /home/cfa24/research/orthocluster_analysis/out/genome_pfal_60.txt -g2 /home/cfa24/research/orthocluster_analysis/out/genome_pviv_60.txt -d /home/cfa24/research/orthocluster_ana	5	0	406	50	50	1	0	1	0	10.5025	10.5025	254	1315	106	1606	30	732	12	422	4	189	0	0	0	0	0	0	0	0	0	0	0	0	0	0	0	0	0	0	0	0	0	0	0	0	0	0	0	0
-m /home/cfa24/research/orthocluster_analysis/out/mapping_pfal_pviv_60.txt -g1 /home/cfa24/research/orthocluster_analysis/out/genome_pfal_60.txt -g2 /home/cfa24/research/orthocluster_analysis/out/genome_pviv_60.txt -d /home/cfa24/research/orthocluster_ana	5	5	243	167	169	1	135	1	112	18.177	18.0823	151	719	26	391	28	679	8	263	8	368	1	59	5	313	3	227	3	249	2	183	5	520	1	113	0	0	0	0	0	0	0	0	2	333	0	0	0	0
-m /home/cfa24/research/orthocluster_analysis/out/mapping_pfal_pviv_60.txt -g1 /home/cfa24/research/orthocluster_analysis/out/genome_pfal_60.txt -g2 /home/cfa24/research/orthocluster_analysis/out/genome_pviv_60.txt -d /home/cfa24/research/orthocluster_ana	5	10	56	427	418	6	377	4	317	83.8571	82.75	19	97	7	94	5	127	2	67	4	177	1	53	2	129	0	0	0	0	0	0	1	106	0	0	1	126	0	0	3	430	0	0	1	163	0	0	0	0
-m /home/cfa24/research/orthocluster_analysis/out/mapping_pfal_pviv_60.txt -g1 /home/cfa24/research/orthocluster_analysis/out/genome_pfal_60.txt -g2 /home/cfa24/research/orthocluster_analysis/out/genome_pviv_60.txt -d /home/cfa24/research/orthocluster_ana	5	15	34	439	428	7	439	5	375	140.176	138.235	4	16	2	25	3	69	0	0	3	128	0	0	3	197	0	0	2	176	1	93	1	106	0	0	0	0	0	0	2	290	1	156	1	163	1	174	0	0
-m /home/cfa24/research/orthocluster_analysis/out/mapping_pfal_pviv_60.txt -g1 /home/cfa24/research/orthocluster_analysis/out/genome_pfal_60.txt -g2 /home/cfa24/research/orthocluster_analysis/out/genome_pviv_60.txt -d /home/cfa24/research/orthocluster_ana	5	20	29	439	428	7	455	5	389	165	162.655	1	2	0	0	3	69	0	0	1	43	1	57	3	196	0	0	3	263	1	93	1	106	0	0	0	0	0	0	2	290	1	156	1	163	1	174	0	0
-m /home/cfa24/research/orthocluster_analysis/out/mapping_pfal_pviv_60.txt -g1 /home/cfa24/research/orthocluster_analysis/out/genome_pfal_60.txt -g2 /home/cfa24/research/orthocluster_analysis/out/genome_pviv_60.txt -d /home/cfa24/research/orthocluster_ana	5	25	28	439	428	7	458	5	393	171.071	168.679	0	0	0	0	3	69	0	0	1	43	1	59	2	129	1	72	3	263	1	93	1	106	0	0	0	0	0	0	2	290	1	156	1	163	1	174	0	0
-m /home/cfa24/research/orthocluster_analysis/out/mapping_pfal_pviv_60.txt -g1 /home/cfa24/research/orthocluster_analysis/out/genome_pfal_60.txt -g2 /home/cfa24/research/orthocluster_analysis/out/genome_pviv_60.txt -d /home/cfa24/research/orthocluster_ana	5	30	28	439	428	7	458	5	393	171.071	168.679	0	0	0	0	3	69	0	0	1	43	1	59	2	129	1	72	3	263	1	93	1	106	0	0	0	0	0	0	2	290	1	156	1	163	1	174	0	0
-m /home/cfa24/research/orthocluster_analysis/out/mapping_pfal_pviv_60.txt -g1 /home/cfa24/research/orthocluster_analysis/out/genome_pfal_60.txt -g2 /home/cfa24/research/orthocluster_analysis/out/genome_pviv_60.txt -d /home/cfa24/research/orthocluster_ana	5	35	28	439	428	7	458	5	422	171.071	169.714	1	3	0	0	2	44	0	0	1	43	1	59	2	129	0	0	3	263	2	187	1	106	0	0	0	0	0	0	2	290	1	156	1	163	1	174	0	0
-m /home/cfa24/research/orthocluster_analysis/out/mapping_pfal_pviv_60.txt -g1 /home/cfa24/research/orthocluster_analysis/out/genome_pfal_60.txt -g2 /home/cfa24/research/orthocluster_analysis/out/genome_pviv_60.txt -d /home/cfa24/research/orthocluster_ana	5	40	27	439	428	7	460	5	424	177.481	176.074	0	0	0	0	2	44	0	0	1	43	1	59	2	129	0	0	3	263	2	192	1	106	0	0	0	0	0	0	2	290	1	156	1	163	1	174	0	0
-m /home/cfa24/research/orthocluster_analysis/out/mapping_pfal_pviv_60.txt -g1 /home/cfa24/research/orthocluster_analysis/out/genome_pfal_60.txt -g2 /home/cfa24/research/orthocluster_analysis/out/genome_pviv_60.txt -d /home/cfa24/research/orthocluster_ana	5	45	27	439	428	7	460	5	424	177.481	176.074	0	0	0	0	2	44	0	0	1	43	1	59	2	129	0	0	3	263	2	192	1	106	0	0	0	0	0	0	2	290	1	156	1	163	1	174	0	0
-m /home/cfa24/research/orthocluster_analysis/out/mapping_pfal_pviv_60.txt -g1 /home/cfa24/research/orthocluster_analysis/out/genome_pfal_60.txt -g2 /home/cfa24/research/orthocluster_analysis/out/genome_pviv_60.txt -d /home/cfa24/research/orthocluster_ana	5	50	27	439	428	7	460	5	424	177.481	176.074	0	0	0	0	2	44	0	0	1	43	1	59	2	129	0	0	3	263	2	192	1	106	0	0	0	0	0	0	2	290	1	156	1	163	1	174	0	0
-m /home/cfa24/research/orthocluster_analysis/out/mapping_pfal_pviv_60.txt -g1 /home/cfa24/research/orthocluster_analysis/out/genome_pfal_60.txt -g2 /home/cfa24/research/orthocluster_analysis/out/genome_pviv_60.txt -d /home/cfa24/research/orthocluster_ana	5	55	27	439	428	7	460	5	424	177.481	176.074	0	0	0	0	2	44	0	0	1	43	1	59	2	129	0	0	3	263	2	192	1	106	0	0	0	0	0	0	2	290	1	156	1	163	1	174	0	0
-m /home/cfa24/research/orthocluster_analysis/out/mapping_pfal_pviv_60.txt -g1 /home/cfa24/research/orthocluster_analysis/out/genome_pfal_60.txt -g2 /home/cfa24/research/orthocluster_analysis/out/genome_pviv_60.txt -d /home/cfa24/research/orthocluster_ana	5	60	27	439	428	7	460	5	424	177.481	176.074	0	0	0	0	2	44	0	0	1	43	1	59	2	129	0	0	3	263	2	192	1	106	0	0	0	0	0	0	2	290	1	156	1	163	1	174	0	0
-m /home/cfa24/research/orthocluster_analysis/out/mapping_pfal_pviv_60.txt -g1 /home/cfa24/research/orthocluster_analysis/out/genome_pfal_60.txt -g2 /home/cfa24/research/orthocluster_analysis/out/genome_pviv_60.txt -d /home/cfa24/research/orthocluster_ana	5	65	27	439	428	7	460	5	424	177.481	176.074	0	0	0	0	2	44	0	0	1	43	1	59	2	129	0	0	3	263	2	192	1	106	0	0	0	0	0	0	2	290	1	156	1	163	1	174	0	0
-m /home/cfa24/research/orthocluster_analysis/out/mapping_pfal_pviv_60.txt -g1 /home/cfa24/research/orthocluster_analysis/out/genome_pfal_60.txt -g2 /home/cfa24/research/orthocluster_analysis/out/genome_pviv_60.txt -d /home/cfa24/research/orthocluster_ana	5	70	27	439	428	7	460	5	424	177.481	176.074	0	0	0	0	2	44	0	0	1	43	1	59	2	129	0	0	3	263	2	192	1	106	0	0	0	0	0	0	2	290	1	156	1	163	1	174	0	0
-m /home/cfa24/research/orthocluster_analysis/out/mapping_pfal_pviv_60.txt -g1 /home/cfa24/research/orthocluster_analysis/out/genome_pfal_60.txt -g2 /home/cfa24/research/orthocluster_analysis/out/genome_pviv_60.txt -d /home/cfa24/research/orthocluster_ana	5	75	27	439	428	7	460	5	424	177.481	176.074	0	0	0	0	2	44	0	0	1	43	1	59	2	129	0	0	3	263	2	192	1	106	0	0	0	0	0	0	2	290	1	156	1	163	1	174	0	0
-m /home/cfa24/research/orthocluster_analysis/out/mapping_pfal_pviv_60.txt -g1 /home/cfa24/research/orthocluster_analysis/out/genome_pfal_60.txt -g2 /home/cfa24/research/orthocluster_analysis/out/genome_pviv_60.txt -d /home/cfa24/research/orthocluster_ana	5	80	27	439	428	7	460	5	424	177.481	176.074	0	0	0	0	2	44	0	0	1	43	1	59	2	129	0	0	3	263	2	192	1	106	0	0	0	0	0	0	2	290	1	156	1	163	1	174	0	0
-m /home/cfa24/research/orthocluster_analysis/out/mapping_pfal_pviv_60.txt -g1 /home/cfa24/research/orthocluster_analysis/out/genome_pfal_60.txt -g2 /home/cfa24/research/orthocluster_analysis/out/genome_pviv_60.txt -d /home/cfa24/research/orthocluster_ana	10	0	406	50	50	1	0	1	0	10.5025	10.5025	254	1315	106	1606	30	732	12	422	4	189	0	0	0	0	0	0	0	0	0	0	0	0	0	0	0	0	0	0	0	0	0	0	0	0	0	0	0	0
-m /home/cfa24/research/orthocluster_analysis/out/mapping_pfal_pviv_60.txt -g1 /home/cfa24/research/orthocluster_analysis/out/genome_pfal_60.txt -g2 /home/cfa24/research/orthocluster_analysis/out/genome_pviv_60.txt -d /home/cfa24/research/orthocluster_ana	10	5	243	167	169	1	135	1	112	18.177	18.0823	151	719	26	391	28	679	8	263	8	368	1	59	5	313	3	227	3	249	2	183	5	520	1	113	0	0	0	0	0	0	0	0	2	333	0	0	0	0
-m /home/cfa24/research/orthocluster_analysis/out/mapping_pfal_pviv_60.txt -g1 /home/cfa24/research/orthocluster_analysis/out/genome_pfal_60.txt -g2 /home/cfa24/research/orthocluster_analysis/out/genome_pviv_60.txt -d /home/cfa24/research/orthocluster_ana	10	10	56	427	418	6	377	4	317	83.8571	82.75	19	97	7	94	5	127	2	67	4	177	1	53	2	129	0	0	0	0	0	0	1	106	0	0	1	126	0	0	3	430	0	0	1	163	0	0	0	0
-m /home/cfa24/research/orthocluster_analysis/out/mapping_pfal_pviv_60.txt -g1 /home/cfa24/research/orthocluster_analysis/out/genome_pfal_60.txt -g2 /home/cfa24/research/orthocluster_analysis/out/genome_pviv_60.txt -d /home/cfa24/research/orthocluster_ana	10	15	34	439	428	7	439	5	375	140.176	138.235	4	16	2	25	3	69	0	0	3	128	0	0	3	197	0	0	2	176	1	93	1	106	0	0	0	0	0	0	2	290	1	156	1	163	1	174	0	0
-m /home/cfa24/research/orthocluster_analysis/out/mapping_pfal_pviv_60.txt -g1 /home/cfa24/research/orthocluster_analysis/out/genome_pfal_60.txt -g2 /home/cfa24/research/orthocluster_analysis/out/genome_pviv_60.txt -d /home/cfa24/research/orthocluster_ana	10	20	29	439	428	7	455	5	389	165	162.655	1	2	0	0	3	69	0	0	1	43	1	57	3	196	0	0	3	263	1	93	1	106	0	0	0	0	0	0	2	290	1	156	1	163	1	174	0	0
-m /home/cfa24/research/orthocluster_analysis/out/mapping_pfal_pviv_60.txt -g1 /home/cfa24/research/orthocluster_analysis/out/genome_pfal_60.txt -g2 /home/cfa24/research/orthocluster_analysis/out/genome_pviv_60.txt -d /home/cfa24/research/orthocluster_ana	10	25	28	439	428	7	458	5	393	171.071	168.679	0	0	0	0	3	69	0	0	1	43	1	59	2	129	1	72	3	263	1	93	1	106	0	0	0	0	0	0	2	290	1	156	1	163	1	174	0	0
-m /home/cfa24/research/orthocluster_analysis/out/mapping_pfal_pviv_60.txt -g1 /home/cfa24/research/orthocluster_analysis/out/genome_pfal_60.txt -g2 /home/cfa24/research/orthocluster_analysis/out/genome_pviv_60.txt -d /home/cfa24/research/orthocluster_ana	10	30	28	439	428	7	458	5	393	171.071	168.679	0	0	0	0	3	69	0	0	1	43	1	59	2	129	1	72	3	263	1	93	1	106	0	0	0	0	0	0	2	290	1	156	1	163	1	174	0	0
-m /home/cfa24/research/orthocluster_analysis/out/mapping_pfal_pviv_60.txt -g1 /home/cfa24/research/orthocluster_analysis/out/genome_pfal_60.txt -g2 /home/cfa24/research/orthocluster_analysis/out/genome_pviv_60.txt -d /home/cfa24/research/orthocluster_ana	10	35	28	439	428	7	458	5	422	171.071	169.714	1	3	0	0	2	44	0	0	1	43	1	59	2	129	0	0	3	263	2	187	1	106	0	0	0	0	0	0	2	290	1	156	1	163	1	174	0	0
-m /home/cfa24/research/orthocluster_analysis/out/mapping_pfal_pviv_60.txt -g1 /home/cfa24/research/orthocluster_analysis/out/genome_pfal_60.txt -g2 /home/cfa24/research/orthocluster_analysis/out/genome_pviv_60.txt -d /home/cfa24/research/orthocluster_ana	10	40	27	439	428	7	460	5	424	177.481	176.074	0	0	0	0	2	44	0	0	1	43	1	59	2	129	0	0	3	263	2	192	1	106	0	0	0	0	0	0	2	290	1	156	1	163	1	174	0	0
-m /home/cfa24/research/orthocluster_analysis/out/mapping_pfal_pviv_60.txt -g1 /home/cfa24/research/orthocluster_analysis/out/genome_pfal_60.txt -g2 /home/cfa24/research/orthocluster_analysis/out/genome_pviv_60.txt -d /home/cfa24/research/orthocluster_ana	10	45	27	439	428	7	460	5	424	177.481	176.074	0	0	0	0	2	44	0	0	1	43	1	59	2	129	0	0	3	263	2	192	1	106	0	0	0	0	0	0	2	290	1	156	1	163	1	174	0	0
-m /home/cfa24/research/orthocluster_analysis/out/mapping_pfal_pviv_60.txt -g1 /home/cfa24/research/orthocluster_analysis/out/genome_pfal_60.txt -g2 /home/cfa24/research/orthocluster_analysis/out/genome_pviv_60.txt -d /home/cfa24/research/orthocluster_ana	10	50	27	439	428	7	460	5	424	177.481	176.074	0	0	0	0	2	44	0	0	1	43	1	59	2	129	0	0	3	263	2	192	1	106	0	0	0	0	0	0	2	290	1	156	1	163	1	174	0	0
-m /home/cfa24/research/orthocluster_analysis/out/mapping_pfal_pviv_60.txt -g1 /home/cfa24/research/orthocluster_analysis/out/genome_pfal_60.txt -g2 /home/cfa24/research/orthocluster_analysis/out/genome_pviv_60.txt -d /home/cfa24/research/orthocluster_ana	10	55	27	439	428	7	460	5	424	177.481	176.074	0	0	0	0	2	44	0	0	1	43	1	59	2	129	0	0	3	263	2	192	1	106	0	0	0	0	0	0	2	290	1	156	1	163	1	174	0	0
-m /home/cfa24/research/orthocluster_analysis/out/mapping_pfal_pviv_60.txt -g1 /home/cfa24/research/orthocluster_analysis/out/genome_pfal_60.txt -g2 /home/cfa24/research/orthocluster_analysis/out/genome_pviv_60.txt -d /home/cfa24/research/orthocluster_ana	10	60	27	439	428	7	460	5	424	177.481	176.074	0	0	0	0	2	44	0	0	1	43	1	59	2	129	0	0	3	263	2	192	1	106	0	0	0	0	0	0	2	290	1	156	1	163	1	174	0	0
-m /home/cfa24/research/orthocluster_analysis/out/mapping_pfal_pviv_60.txt -g1 /home/cfa24/research/orthocluster_analysis/out/genome_pfal_60.txt -g2 /home/cfa24/research/orthocluster_analysis/out/genome_pviv_60.txt -d /home/cfa24/research/orthocluster_ana	10	65	27	439	428	7	460	5	424	177.481	176.074	0	0	0	0	2	44	0	0	1	43	1	59	2	129	0	0	3	263	2	192	1	106	0	0	0	0	0	0	2	290	1	156	1	163	1	174	0	0
-m /home/cfa24/research/orthocluster_analysis/out/mapping_pfal_pviv_60.txt -g1 /home/cfa24/research/orthocluster_analysis/out/genome_pfal_60.txt -g2 /home/cfa24/research/orthocluster_analysis/out/genome_pviv_60.txt -d /home/cfa24/research/orthocluster_ana	10	70	27	439	428	7	460	5	424	177.481	176.074	0	0	0	0	2	44	0	0	1	43	1	59	2	129	0	0	3	263	2	192	1	106	0	0	0	0	0	0	2	290	1	156	1	163	1	174	0	0
-m /home/cfa24/research/orthocluster_analysis/out/mapping_pfal_pviv_60.txt -g1 /home/cfa24/research/orthocluster_analysis/out/genome_pfal_60.txt -g2 /home/cfa24/research/orthocluster_analysis/out/genome_pviv_60.txt -d /home/cfa24/research/orthocluster_ana	10	75	27	439	428	7	460	5	424	177.481	176.074	0	0	0	0	2	44	0	0	1	43	1	59	2	129	0	0	3	263	2	192	1	106	0	0	0	0	0	0	2	290	1	156	1	163	1	174	0	0
-m /home/cfa24/research/orthocluster_analysis/out/mapping_pfal_pviv_60.txt -g1 /home/cfa24/research/orthocluster_analysis/out/genome_pfal_60.txt -g2 /home/cfa24/research/orthocluster_analysis/out/genome_pviv_60.txt -d /home/cfa24/research/orthocluster_ana	10	80	27	439	428	7	460	5	424	177.481	176.074	0	0	0	0	2	44	0	0	1	43	1	59	2	129	0	0	3	263	2	192	1	106	0	0	0	0	0	0	2	290	1	156	1	163	1	174	0	0
-m /home/cfa24/research/orthocluster_analysis/out/mapping_pfal_pviv_60.txt -g1 /home/cfa24/research/orthocluster_analysis/out/genome_pfal_60.txt -g2 /home/cfa24/research/orthocluster_analysis/out/genome_pviv_60.txt -d /home/cfa24/research/orthocluster_ana	15	0	406	50	50	1	0	1	0	10.5025	10.5025	254	1315	106	1606	30	732	12	422	4	189	0	0	0	0	0	0	0	0	0	0	0	0	0	0	0	0	0	0	0	0	0	0	0	0	0	0	0	0
-m /home/cfa24/research/orthocluster_analysis/out/mapping_pfal_pviv_60.txt -g1 /home/cfa24/research/orthocluster_analysis/out/genome_pfal_60.txt -g2 /home/cfa24/research/orthocluster_analysis/out/genome_pviv_60.txt -d /home/cfa24/research/orthocluster_ana	15	5	243	167	169	1	135	1	112	18.177	18.0823	151	719	26	391	28	679	8	263	8	368	1	59	5	313	3	227	3	249	2	183	5	520	1	113	0	0	0	0	0	0	0	0	2	333	0	0	0	0
-m /home/cfa24/research/orthocluster_analysis/out/mapping_pfal_pviv_60.txt -g1 /home/cfa24/research/orthocluster_analysis/out/genome_pfal_60.txt -g2 /home/cfa24/research/orthocluster_analysis/out/genome_pviv_60.txt -d /home/cfa24/research/orthocluster_ana	15	10	56	427	418	6	377	4	317	83.8571	82.75	19	97	7	94	5	127	2	67	4	177	1	53	2	129	0	0	0	0	0	0	1	106	0	0	1	126	0	0	3	430	0	0	1	163	0	0	0	0
-m /home/cfa24/research/orthocluster_analysis/out/mapping_pfal_pviv_60.txt -g1 /home/cfa24/research/orthocluster_analysis/out/genome_pfal_60.txt -g2 /home/cfa24/research/orthocluster_analysis/out/genome_pviv_60.txt -d /home/cfa24/research/orthocluster_ana	15	15	34	439	428	7	439	5	375	140.176	138.235	4	16	2	25	3	69	0	0	3	128	0	0	3	197	0	0	2	176	1	93	1	106	0	0	0	0	0	0	2	290	1	156	1	163	1	174	0	0
-m /home/cfa24/research/orthocluster_analysis/out/mapping_pfal_pviv_60.txt -g1 /home/cfa24/research/orthocluster_analysis/out/genome_pfal_60.txt -g2 /home/cfa24/research/orthocluster_analysis/out/genome_pviv_60.txt -d /home/cfa24/research/orthocluster_ana	15	20	29	439	428	7	455	5	389	165	162.655	1	2	0	0	3	69	0	0	1	43	1	57	3	196	0	0	3	263	1	93	1	106	0	0	0	0	0	0	2	290	1	156	1	163	1	174	0	0
-m /home/cfa24/research/orthocluster_analysis/out/mapping_pfal_pviv_60.txt -g1 /home/cfa24/research/orthocluster_analysis/out/genome_pfal_60.txt -g2 /home/cfa24/research/orthocluster_analysis/out/genome_pviv_60.txt -d /home/cfa24/research/orthocluster_ana	15	25	28	439	428	7	458	5	393	171.071	168.679	0	0	0	0	3	69	0	0	1	43	1	59	2	129	1	72	3	263	1	93	1	106	0	0	0	0	0	0	2	290	1	156	1	163	1	174	0	0
-m /home/cfa24/research/orthocluster_analysis/out/mapping_pfal_pviv_60.txt -g1 /home/cfa24/research/orthocluster_analysis/out/genome_pfal_60.txt -g2 /home/cfa24/research/orthocluster_analysis/out/genome_pviv_60.txt -d /home/cfa24/research/orthocluster_ana	15	30	28	439	428	7	458	5	393	171.071	168.679	0	0	0	0	3	69	0	0	1	43	1	59	2	129	1	72	3	263	1	93	1	106	0	0	0	0	0	0	2	290	1	156	1	163	1	174	0	0
-m /home/cfa24/research/orthocluster_analysis/out/mapping_pfal_pviv_60.txt -g1 /home/cfa24/research/orthocluster_analysis/out/genome_pfal_60.txt -g2 /home/cfa24/research/orthocluster_analysis/out/genome_pviv_60.txt -d /home/cfa24/research/orthocluster_ana	15	35	28	439	428	7	458	5	422	171.071	169.714	1	3	0	0	2	44	0	0	1	43	1	59	2	129	0	0	3	263	2	187	1	106	0	0	0	0	0	0	2	290	1	156	1	163	1	174	0	0
-m /home/cfa24/research/orthocluster_analysis/out/mapping_pfal_pviv_60.txt -g1 /home/cfa24/research/orthocluster_analysis/out/genome_pfal_60.txt -g2 /home/cfa24/research/orthocluster_analysis/out/genome_pviv_60.txt -d /home/cfa24/research/orthocluster_ana	15	40	27	439	428	7	460	5	424	177.481	176.074	0	0	0	0	2	44	0	0	1	43	1	59	2	129	0	0	3	263	2	192	1	106	0	0	0	0	0	0	2	290	1	156	1	163	1	174	0	0
-m /home/cfa24/research/orthocluster_analysis/out/mapping_pfal_pviv_60.txt -g1 /home/cfa24/research/orthocluster_analysis/out/genome_pfal_60.txt -g2 /home/cfa24/research/orthocluster_analysis/out/genome_pviv_60.txt -d /home/cfa24/research/orthocluster_ana	15	45	27	439	428	7	460	5	424	177.481	176.074	0	0	0	0	2	44	0	0	1	43	1	59	2	129	0	0	3	263	2	192	1	106	0	0	0	0	0	0	2	290	1	156	1	163	1	174	0	0
-m /home/cfa24/research/orthocluster_analysis/out/mapping_pfal_pviv_60.txt -g1 /home/cfa24/research/orthocluster_analysis/out/genome_pfal_60.txt -g2 /home/cfa24/research/orthocluster_analysis/out/genome_pviv_60.txt -d /home/cfa24/research/orthocluster_ana	15	50	27	439	428	7	460	5	424	177.481	176.074	0	0	0	0	2	44	0	0	1	43	1	59	2	129	0	0	3	263	2	192	1	106	0	0	0	0	0	0	2	290	1	156	1	163	1	174	0	0
-m /home/cfa24/research/orthocluster_analysis/out/mapping_pfal_pviv_60.txt -g1 /home/cfa24/research/orthocluster_analysis/out/genome_pfal_60.txt -g2 /home/cfa24/research/orthocluster_analysis/out/genome_pviv_60.txt -d /home/cfa24/research/orthocluster_ana	15	55	27	439	428	7	460	5	424	177.481	176.074	0	0	0	0	2	44	0	0	1	43	1	59	2	129	0	0	3	263	2	192	1	106	0	0	0	0	0	0	2	290	1	156	1	163	1	174	0	0
-m /home/cfa24/research/orthocluster_analysis/out/mapping_pfal_pviv_60.txt -g1 /home/cfa24/research/orthocluster_analysis/out/genome_pfal_60.txt -g2 /home/cfa24/research/orthocluster_analysis/out/genome_pviv_60.txt -d /home/cfa24/research/orthocluster_ana	15	60	27	439	428	7	460	5	424	177.481	176.074	0	0	0	0	2	44	0	0	1	43	1	59	2	129	0	0	3	263	2	192	1	106	0	0	0	0	0	0	2	290	1	156	1	163	1	174	0	0
-m /home/cfa24/research/orthocluster_analysis/out/mapping_pfal_pviv_60.txt -g1 /home/cfa24/research/orthocluster_analysis/out/genome_pfal_60.txt -g2 /home/cfa24/research/orthocluster_analysis/out/genome_pviv_60.txt -d /home/cfa24/research/orthocluster_ana	15	65	27	439	428	7	460	5	424	177.481	176.074	0	0	0	0	2	44	0	0	1	43	1	59	2	129	0	0	3	263	2	192	1	106	0	0	0	0	0	0	2	290	1	156	1	163	1	174	0	0
-m /home/cfa24/research/orthocluster_analysis/out/mapping_pfal_pviv_60.txt -g1 /home/cfa24/research/orthocluster_analysis/out/genome_pfal_60.txt -g2 /home/cfa24/research/orthocluster_analysis/out/genome_pviv_60.txt -d /home/cfa24/research/orthocluster_ana	15	70	27	439	428	7	460	5	424	177.481	176.074	0	0	0	0	2	44	0	0	1	43	1	59	2	129	0	0	3	263	2	192	1	106	0	0	0	0	0	0	2	290	1	156	1	163	1	174	0	0
-m /home/cfa24/research/orthocluster_analysis/out/mapping_pfal_pviv_60.txt -g1 /home/cfa24/research/orthocluster_analysis/out/genome_pfal_60.txt -g2 /home/cfa24/research/orthocluster_analysis/out/genome_pviv_60.txt -d /home/cfa24/research/orthocluster_ana	15	75	27	439	428	7	460	5	424	177.481	176.074	0	0	0	0	2	44	0	0	1	43	1	59	2	129	0	0	3	263	2	192	1	106	0	0	0	0	0	0	2	290	1	156	1	163	1	174	0	0
-m /home/cfa24/research/orthocluster_analysis/out/mapping_pfal_pviv_60.txt -g1 /home/cfa24/research/orthocluster_analysis/out/genome_pfal_60.txt -g2 /home/cfa24/research/orthocluster_analysis/out/genome_pviv_60.txt -d /home/cfa24/research/orthocluster_ana	15	80	27	439	428	7	460	5	424	177.481	176.074	0	0	0	0	2	44	0	0	1	43	1	59	2	129	0	0	3	263	2	192	1	106	0	0	0	0	0	0	2	290	1	156	1	163	1	174	0	0
-m /home/cfa24/research/orthocluster_analysis/out/mapping_pfal_pviv_60.txt -g1 /home/cfa24/research/orthocluster_analysis/out/genome_pfal_60.txt -g2 /home/cfa24/research/orthocluster_analysis/out/genome_pviv_60.txt -d /home/cfa24/research/orthocluster_ana	20	0	406	50	50	1	0	1	0	10.5025	10.5025	254	1315	106	1606	30	732	12	422	4	189	0	0	0	0	0	0	0	0	0	0	0	0	0	0	0	0	0	0	0	0	0	0	0	0	0	0	0	0
-m /home/cfa24/research/orthocluster_analysis/out/mapping_pfal_pviv_60.txt -g1 /home/cfa24/research/orthocluster_analysis/out/genome_pfal_60.txt -g2 /home/cfa24/research/orthocluster_analysis/out/genome_pviv_60.txt -d /home/cfa24/research/orthocluster_ana	20	5	243	167	169	1	135	1	112	18.177	18.0823	151	719	26	391	28	679	8	263	8	368	1	59	5	313	3	227	3	249	2	183	5	520	1	113	0	0	0	0	0	0	0	0	2	333	0	0	0	0
-m /home/cfa24/research/orthocluster_analysis/out/mapping_pfal_pviv_60.txt -g1 /home/cfa24/research/orthocluster_analysis/out/genome_pfal_60.txt -g2 /home/cfa24/research/orthocluster_analysis/out/genome_pviv_60.txt -d /home/cfa24/research/orthocluster_ana	20	10	56	427	418	6	377	4	317	83.8571	82.75	19	97	7	94	5	127	2	67	4	177	1	53	2	129	0	0	0	0	0	0	1	106	0	0	1	126	0	0	3	430	0	0	1	163	0	0	0	0
-m /home/cfa24/research/orthocluster_analysis/out/mapping_pfal_pviv_60.txt -g1 /home/cfa24/research/orthocluster_analysis/out/genome_pfal_60.txt -g2 /home/cfa24/research/orthocluster_analysis/out/genome_pviv_60.txt -d /home/cfa24/research/orthocluster_ana	20	15	34	439	428	7	439	5	375	140.176	138.235	4	16	2	25	3	69	0	0	3	128	0	0	3	197	0	0	2	176	1	93	1	106	0	0	0	0	0	0	2	290	1	156	1	163	1	174	0	0
-m /home/cfa24/research/orthocluster_analysis/out/mapping_pfal_pviv_60.txt -g1 /home/cfa24/research/orthocluster_analysis/out/genome_pfal_60.txt -g2 /home/cfa24/research/orthocluster_analysis/out/genome_pviv_60.txt -d /home/cfa24/research/orthocluster_ana	20	20	29	439	428	7	455	5	389	165	162.655	1	2	0	0	3	69	0	0	1	43	1	57	3	196	0	0	3	263	1	93	1	106	0	0	0	0	0	0	2	290	1	156	1	163	1	174	0	0
-m /home/cfa24/research/orthocluster_analysis/out/mapping_pfal_pviv_60.txt -g1 /home/cfa24/research/orthocluster_analysis/out/genome_pfal_60.txt -g2 /home/cfa24/research/orthocluster_analysis/out/genome_pviv_60.txt -d /home/cfa24/research/orthocluster_ana	20	25	28	439	428	7	458	5	393	171.071	168.679	0	0	0	0	3	69	0	0	1	43	1	59	2	129	1	72	3	263	1	93	1	106	0	0	0	0	0	0	2	290	1	156	1	163	1	174	0	0
-m /home/cfa24/research/orthocluster_analysis/out/mapping_pfal_pviv_60.txt -g1 /home/cfa24/research/orthocluster_analysis/out/genome_pfal_60.txt -g2 /home/cfa24/research/orthocluster_analysis/out/genome_pviv_60.txt -d /home/cfa24/research/orthocluster_ana	20	30	28	439	428	7	458	5	393	171.071	168.679	0	0	0	0	3	69	0	0	1	43	1	59	2	129	1	72	3	263	1	93	1	106	0	0	0	0	0	0	2	290	1	156	1	163	1	174	0	0
-m /home/cfa24/research/orthocluster_analysis/out/mapping_pfal_pviv_60.txt -g1 /home/cfa24/research/orthocluster_analysis/out/genome_pfal_60.txt -g2 /home/cfa24/research/orthocluster_analysis/out/genome_pviv_60.txt -d /home/cfa24/research/orthocluster_ana	20	35	28	439	428	7	458	5	422	171.071	169.714	1	3	0	0	2	44	0	0	1	43	1	59	2	129	0	0	3	263	2	187	1	106	0	0	0	0	0	0	2	290	1	156	1	163	1	174	0	0
-m /home/cfa24/research/orthocluster_analysis/out/mapping_pfal_pviv_60.txt -g1 /home/cfa24/research/orthocluster_analysis/out/genome_pfal_60.txt -g2 /home/cfa24/research/orthocluster_analysis/out/genome_pviv_60.txt -d /home/cfa24/research/orthocluster_ana	20	40	27	439	428	7	460	5	424	177.481	176.074	0	0	0	0	2	44	0	0	1	43	1	59	2	129	0	0	3	263	2	192	1	106	0	0	0	0	0	0	2	290	1	156	1	163	1	174	0	0
-m /home/cfa24/research/orthocluster_analysis/out/mapping_pfal_pviv_60.txt -g1 /home/cfa24/research/orthocluster_analysis/out/genome_pfal_60.txt -g2 /home/cfa24/research/orthocluster_analysis/out/genome_pviv_60.txt -d /home/cfa24/research/orthocluster_ana	20	45	27	439	428	7	460	5	424	177.481	176.074	0	0	0	0	2	44	0	0	1	43	1	59	2	129	0	0	3	263	2	192	1	106	0	0	0	0	0	0	2	290	1	156	1	163	1	174	0	0
-m /home/cfa24/research/orthocluster_analysis/out/mapping_pfal_pviv_60.txt -g1 /home/cfa24/research/orthocluster_analysis/out/genome_pfal_60.txt -g2 /home/cfa24/research/orthocluster_analysis/out/genome_pviv_60.txt -d /home/cfa24/research/orthocluster_ana	20	50	27	439	428	7	460	5	424	177.481	176.074	0	0	0	0	2	44	0	0	1	43	1	59	2	129	0	0	3	263	2	192	1	106	0	0	0	0	0	0	2	290	1	156	1	163	1	174	0	0
-m /home/cfa24/research/orthocluster_analysis/out/mapping_pfal_pviv_60.txt -g1 /home/cfa24/research/orthocluster_analysis/out/genome_pfal_60.txt -g2 /home/cfa24/research/orthocluster_analysis/out/genome_pviv_60.txt -d /home/cfa24/research/orthocluster_ana	20	55	27	439	428	7	460	5	424	177.481	176.074	0	0	0	0	2	44	0	0	1	43	1	59	2	129	0	0	3	263	2	192	1	106	0	0	0	0	0	0	2	290	1	156	1	163	1	174	0	0
-m /home/cfa24/research/orthocluster_analysis/out/mapping_pfal_pviv_60.txt -g1 /home/cfa24/research/orthocluster_analysis/out/genome_pfal_60.txt -g2 /home/cfa24/research/orthocluster_analysis/out/genome_pviv_60.txt -d /home/cfa24/research/orthocluster_ana	20	60	27	439	428	7	460	5	424	177.481	176.074	0	0	0	0	2	44	0	0	1	43	1	59	2	129	0	0	3	263	2	192	1	106	0	0	0	0	0	0	2	290	1	156	1	163	1	174	0	0
-m /home/cfa24/research/orthocluster_analysis/out/mapping_pfal_pviv_60.txt -g1 /home/cfa24/research/orthocluster_analysis/out/genome_pfal_60.txt -g2 /home/cfa24/research/orthocluster_analysis/out/genome_pviv_60.txt -d /home/cfa24/research/orthocluster_ana	20	65	27	439	428	7	460	5	424	177.481	176.074	0	0	0	0	2	44	0	0	1	43	1	59	2	129	0	0	3	263	2	192	1	106	0	0	0	0	0	0	2	290	1	156	1	163	1	174	0	0
-m /home/cfa24/research/orthocluster_analysis/out/mapping_pfal_pviv_60.txt -g1 /home/cfa24/research/orthocluster_analysis/out/genome_pfal_60.txt -g2 /home/cfa24/research/orthocluster_analysis/out/genome_pviv_60.txt -d /home/cfa24/research/orthocluster_ana	20	70	27	439	428	7	460	5	424	177.481	176.074	0	0	0	0	2	44	0	0	1	43	1	59	2	129	0	0	3	263	2	192	1	106	0	0	0	0	0	0	2	290	1	156	1	163	1	174	0	0
-m /home/cfa24/research/orthocluster_analysis/out/mapping_pfal_pviv_60.txt -g1 /home/cfa24/research/orthocluster_analysis/out/genome_pfal_60.txt -g2 /home/cfa24/research/orthocluster_analysis/out/genome_pviv_60.txt -d /home/cfa24/research/orthocluster_ana	20	75	27	439	428	7	460	5	424	177.481	176.074	0	0	0	0	2	44	0	0	1	43	1	59	2	129	0	0	3	263	2	192	1	106	0	0	0	0	0	0	2	290	1	156	1	163	1	174	0	0
-m /home/cfa24/research/orthocluster_analysis/out/mapping_pfal_pviv_60.txt -g1 /home/cfa24/research/orthocluster_analysis/out/genome_pfal_60.txt -g2 /home/cfa24/research/orthocluster_analysis/out/genome_pviv_60.txt -d /home/cfa24/research/orthocluster_ana	20	80	27	439	428	7	460	5	424	177.481	176.074	0	0	0	0	2	44	0	0	1	43	1	59	2	129	0	0	3	263	2	192	1	106	0	0	0	0	0	0	2	290	1	156	1	163	1	174	0	0
-m /home/cfa24/research/orthocluster_analysis/out/mapping_pfal_pviv_60.txt -g1 /home/cfa24/research/orthocluster_analysis/out/genome_pfal_60.txt -g2 /home/cfa24/research/orthocluster_analysis/out/genome_pviv_60.txt -d /home/cfa24/research/orthocluster_ana	25	0	406	50	50	1	0	1	0	10.5025	10.5025	254	1315	106	1606	30	732	12	422	4	189	0	0	0	0	0	0	0	0	0	0	0	0	0	0	0	0	0	0	0	0	0	0	0	0	0	0	0	0
-m /home/cfa24/research/orthocluster_analysis/out/mapping_pfal_pviv_60.txt -g1 /home/cfa24/research/orthocluster_analysis/out/genome_pfal_60.txt -g2 /home/cfa24/research/orthocluster_analysis/out/genome_pviv_60.txt -d /home/cfa24/research/orthocluster_ana	25	5	243	167	169	1	135	1	112	18.177	18.0823	151	719	26	391	28	679	8	263	8	368	1	59	5	313	3	227	3	249	2	183	5	520	1	113	0	0	0	0	0	0	0	0	2	333	0	0	0	0
-m /home/cfa24/research/orthocluster_analysis/out/mapping_pfal_pviv_60.txt -g1 /home/cfa24/research/orthocluster_analysis/out/genome_pfal_60.txt -g2 /home/cfa24/research/orthocluster_analysis/out/genome_pviv_60.txt -d /home/cfa24/research/orthocluster_ana	25	10	56	427	418	6	377	4	317	83.8571	82.75	19	97	7	94	5	127	2	67	4	177	1	53	2	129	0	0	0	0	0	0	1	106	0	0	1	126	0	0	3	430	0	0	1	163	0	0	0	0
-m /home/cfa24/research/orthocluster_analysis/out/mapping_pfal_pviv_60.txt -g1 /home/cfa24/research/orthocluster_analysis/out/genome_pfal_60.txt -g2 /home/cfa24/research/orthocluster_analysis/out/genome_pviv_60.txt -d /home/cfa24/research/orthocluster_ana	25	15	34	439	428	7	439	5	375	140.176	138.235	4	16	2	25	3	69	0	0	3	128	0	0	3	197	0	0	2	176	1	93	1	106	0	0	0	0	0	0	2	290	1	156	1	163	1	174	0	0
-m /home/cfa24/research/orthocluster_analysis/out/mapping_pfal_pviv_60.txt -g1 /home/cfa24/research/orthocluster_analysis/out/genome_pfal_60.txt -g2 /home/cfa24/research/orthocluster_analysis/out/genome_pviv_60.txt -d /home/cfa24/research/orthocluster_ana	25	20	29	439	428	7	455	5	389	165	162.655	1	2	0	0	3	69	0	0	1	43	1	57	3	196	0	0	3	263	1	93	1	106	0	0	0	0	0	0	2	290	1	156	1	163	1	174	0	0
-m /home/cfa24/research/orthocluster_analysis/out/mapping_pfal_pviv_60.txt -g1 /home/cfa24/research/orthocluster_analysis/out/genome_pfal_60.txt -g2 /home/cfa24/research/orthocluster_analysis/out/genome_pviv_60.txt -d /home/cfa24/research/orthocluster_ana	25	25	28	439	428	7	458	5	393	171.071	168.679	0	0	0	0	3	69	0	0	1	43	1	59	2	129	1	72	3	263	1	93	1	106	0	0	0	0	0	0	2	290	1	156	1	163	1	174	0	0
-m /home/cfa24/research/orthocluster_analysis/out/mapping_pfal_pviv_60.txt -g1 /home/cfa24/research/orthocluster_analysis/out/genome_pfal_60.txt -g2 /home/cfa24/research/orthocluster_analysis/out/genome_pviv_60.txt -d /home/cfa24/research/orthocluster_ana	25	30	28	439	428	7	458	5	393	171.071	168.679	0	0	0	0	3	69	0	0	1	43	1	59	2	129	1	72	3	263	1	93	1	106	0	0	0	0	0	0	2	290	1	156	1	163	1	174	0	0
-m /home/cfa24/research/orthocluster_analysis/out/mapping_pfal_pviv_60.txt -g1 /home/cfa24/research/orthocluster_analysis/out/genome_pfal_60.txt -g2 /home/cfa24/research/orthocluster_analysis/out/genome_pviv_60.txt -d /home/cfa24/research/orthocluster_ana	25	35	28	439	428	7	458	5	422	171.071	169.714	1	3	0	0	2	44	0	0	1	43	1	59	2	129	0	0	3	263	2	187	1	106	0	0	0	0	0	0	2	290	1	156	1	163	1	174	0	0
-m /home/cfa24/research/orthocluster_analysis/out/mapping_pfal_pviv_60.txt -g1 /home/cfa24/research/orthocluster_analysis/out/genome_pfal_60.txt -g2 /home/cfa24/research/orthocluster_analysis/out/genome_pviv_60.txt -d /home/cfa24/research/orthocluster_ana	25	40	27	439	428	7	460	5	424	177.481	176.074	0	0	0	0	2	44	0	0	1	43	1	59	2	129	0	0	3	263	2	192	1	106	0	0	0	0	0	0	2	290	1	156	1	163	1	174	0	0
-m /home/cfa24/research/orthocluster_analysis/out/mapping_pfal_pviv_60.txt -g1 /home/cfa24/research/orthocluster_analysis/out/genome_pfal_60.txt -g2 /home/cfa24/research/orthocluster_analysis/out/genome_pviv_60.txt -d /home/cfa24/research/orthocluster_ana	25	45	27	439	428	7	460	5	424	177.481	176.074	0	0	0	0	2	44	0	0	1	43	1	59	2	129	0	0	3	263	2	192	1	106	0	0	0	0	0	0	2	290	1	156	1	163	1	174	0	0
-m /home/cfa24/research/orthocluster_analysis/out/mapping_pfal_pviv_60.txt -g1 /home/cfa24/research/orthocluster_analysis/out/genome_pfal_60.txt -g2 /home/cfa24/research/orthocluster_analysis/out/genome_pviv_60.txt -d /home/cfa24/research/orthocluster_ana	25	50	27	439	428	7	460	5	424	177.481	176.074	0	0	0	0	2	44	0	0	1	43	1	59	2	129	0	0	3	263	2	192	1	106	0	0	0	0	0	0	2	290	1	156	1	163	1	174	0	0
-m /home/cfa24/research/orthocluster_analysis/out/mapping_pfal_pviv_60.txt -g1 /home/cfa24/research/orthocluster_analysis/out/genome_pfal_60.txt -g2 /home/cfa24/research/orthocluster_analysis/out/genome_pviv_60.txt -d /home/cfa24/research/orthocluster_ana	25	55	27	439	428	7	460	5	424	177.481	176.074	0	0	0	0	2	44	0	0	1	43	1	59	2	129	0	0	3	263	2	192	1	106	0	0	0	0	0	0	2	290	1	156	1	163	1	174	0	0
-m /home/cfa24/research/orthocluster_analysis/out/mapping_pfal_pviv_60.txt -g1 /home/cfa24/research/orthocluster_analysis/out/genome_pfal_60.txt -g2 /home/cfa24/research/orthocluster_analysis/out/genome_pviv_60.txt -d /home/cfa24/research/orthocluster_ana	25	60	27	439	428	7	460	5	424	177.481	176.074	0	0	0	0	2	44	0	0	1	43	1	59	2	129	0	0	3	263	2	192	1	106	0	0	0	0	0	0	2	290	1	156	1	163	1	174	0	0
-m /home/cfa24/research/orthocluster_analysis/out/mapping_pfal_pviv_60.txt -g1 /home/cfa24/research/orthocluster_analysis/out/genome_pfal_60.txt -g2 /home/cfa24/research/orthocluster_analysis/out/genome_pviv_60.txt -d /home/cfa24/research/orthocluster_ana	25	65	27	439	428	7	460	5	424	177.481	176.074	0	0	0	0	2	44	0	0	1	43	1	59	2	129	0	0	3	263	2	192	1	106	0	0	0	0	0	0	2	290	1	156	1	163	1	174	0	0
-m /home/cfa24/research/orthocluster_analysis/out/mapping_pfal_pviv_60.txt -g1 /home/cfa24/research/orthocluster_analysis/out/genome_pfal_60.txt -g2 /home/cfa24/research/orthocluster_analysis/out/genome_pviv_60.txt -d /home/cfa24/research/orthocluster_ana	25	70	27	439	428	7	460	5	424	177.481	176.074	0	0	0	0	2	44	0	0	1	43	1	59	2	129	0	0	3	263	2	192	1	106	0	0	0	0	0	0	2	290	1	156	1	163	1	174	0	0
-m /home/cfa24/research/orthocluster_analysis/out/mapping_pfal_pviv_60.txt -g1 /home/cfa24/research/orthocluster_analysis/out/genome_pfal_60.txt -g2 /home/cfa24/research/orthocluster_analysis/out/genome_pviv_60.txt -d /home/cfa24/research/orthocluster_ana	25	75	27	439	428	7	460	5	424	177.481	176.074	0	0	0	0	2	44	0	0	1	43	1	59	2	129	0	0	3	263	2	192	1	106	0	0	0	0	0	0	2	290	1	156	1	163	1	174	0	0
-m /home/cfa24/research/orthocluster_analysis/out/mapping_pfal_pviv_60.txt -g1 /home/cfa24/research/orthocluster_analysis/out/genome_pfal_60.txt -g2 /home/cfa24/research/orthocluster_analysis/out/genome_pviv_60.txt -d /home/cfa24/research/orthocluster_ana	25	80	27	439	428	7	460	5	424	177.481	176.074	0	0	0	0	2	44	0	0	1	43	1	59	2	129	0	0	3	263	2	192	1	106	0	0	0	0	0	0	2	290	1	156	1	163	1	174	0	0
-m /home/cfa24/research/orthocluster_analysis/out/mapping_pfal_pviv_60.txt -g1 /home/cfa24/research/orthocluster_analysis/out/genome_pfal_60.txt -g2 /home/cfa24/research/orthocluster_analysis/out/genome_pviv_60.txt -d /home/cfa24/research/orthocluster_ana	30	0	406	50	50	1	0	1	0	10.5025	10.5025	254	1315	106	1606	30	732	12	422	4	189	0	0	0	0	0	0	0	0	0	0	0	0	0	0	0	0	0	0	0	0	0	0	0	0	0	0	0	0
-m /home/cfa24/research/orthocluster_analysis/out/mapping_pfal_pviv_60.txt -g1 /home/cfa24/research/orthocluster_analysis/out/genome_pfal_60.txt -g2 /home/cfa24/research/orthocluster_analysis/out/genome_pviv_60.txt -d /home/cfa24/research/orthocluster_ana	30	5	243	167	169	1	135	1	112	18.177	18.0823	151	719	26	391	28	679	8	263	8	368	1	59	5	313	3	227	3	249	2	183	5	520	1	113	0	0	0	0	0	0	0	0	2	333	0	0	0	0
-m /home/cfa24/research/orthocluster_analysis/out/mapping_pfal_pviv_60.txt -g1 /home/cfa24/research/orthocluster_analysis/out/genome_pfal_60.txt -g2 /home/cfa24/research/orthocluster_analysis/out/genome_pviv_60.txt -d /home/cfa24/research/orthocluster_ana	30	10	56	427	418	6	377	4	317	83.8571	82.75	19	97	7	94	5	127	2	67	4	177	1	53	2	129	0	0	0	0	0	0	1	106	0	0	1	126	0	0	3	430	0	0	1	163	0	0	0	0
-m /home/cfa24/research/orthocluster_analysis/out/mapping_pfal_pviv_60.txt -g1 /home/cfa24/research/orthocluster_analysis/out/genome_pfal_60.txt -g2 /home/cfa24/research/orthocluster_analysis/out/genome_pviv_60.txt -d /home/cfa24/research/orthocluster_ana	30	15	34	439	428	7	439	5	375	140.176	138.235	4	16	2	25	3	69	0	0	3	128	0	0	3	197	0	0	2	176	1	93	1	106	0	0	0	0	0	0	2	290	1	156	1	163	1	174	0	0
-m /home/cfa24/research/orthocluster_analysis/out/mapping_pfal_pviv_60.txt -g1 /home/cfa24/research/orthocluster_analysis/out/genome_pfal_60.txt -g2 /home/cfa24/research/orthocluster_analysis/out/genome_pviv_60.txt -d /home/cfa24/research/orthocluster_ana	30	20	29	439	428	7	455	5	389	165	162.655	1	2	0	0	3	69	0	0	1	43	1	57	3	196	0	0	3	263	1	93	1	106	0	0	0	0	0	0	2	290	1	156	1	163	1	174	0	0
-m /home/cfa24/research/orthocluster_analysis/out/mapping_pfal_pviv_60.txt -g1 /home/cfa24/research/orthocluster_analysis/out/genome_pfal_60.txt -g2 /home/cfa24/research/orthocluster_analysis/out/genome_pviv_60.txt -d /home/cfa24/research/orthocluster_ana	30	25	28	439	428	7	458	5	393	171.071	168.679	0	0	0	0	3	69	0	0	1	43	1	59	2	129	1	72	3	263	1	93	1	106	0	0	0	0	0	0	2	290	1	156	1	163	1	174	0	0
-m /home/cfa24/research/orthocluster_analysis/out/mapping_pfal_pviv_60.txt -g1 /home/cfa24/research/orthocluster_analysis/out/genome_pfal_60.txt -g2 /home/cfa24/research/orthocluster_analysis/out/genome_pviv_60.txt -d /home/cfa24/research/orthocluster_ana	30	30	28	439	428	7	458	5	393	171.071	168.679	0	0	0	0	3	69	0	0	1	43	1	59	2	129	1	72	3	263	1	93	1	106	0	0	0	0	0	0	2	290	1	156	1	163	1	174	0	0
-m /home/cfa24/research/orthocluster_analysis/out/mapping_pfal_pviv_60.txt -g1 /home/cfa24/research/orthocluster_analysis/out/genome_pfal_60.txt -g2 /home/cfa24/research/orthocluster_analysis/out/genome_pviv_60.txt -d /home/cfa24/research/orthocluster_ana	30	35	28	439	428	7	458	5	422	171.071	169.714	1	3	0	0	2	44	0	0	1	43	1	59	2	129	0	0	3	263	2	187	1	106	0	0	0	0	0	0	2	290	1	156	1	163	1	174	0	0
-m /home/cfa24/research/orthocluster_analysis/out/mapping_pfal_pviv_60.txt -g1 /home/cfa24/research/orthocluster_analysis/out/genome_pfal_60.txt -g2 /home/cfa24/research/orthocluster_analysis/out/genome_pviv_60.txt -d /home/cfa24/research/orthocluster_ana	30	40	27	439	428	7	460	5	424	177.481	176.074	0	0	0	0	2	44	0	0	1	43	1	59	2	129	0	0	3	263	2	192	1	106	0	0	0	0	0	0	2	290	1	156	1	163	1	174	0	0
-m /home/cfa24/research/orthocluster_analysis/out/mapping_pfal_pviv_60.txt -g1 /home/cfa24/research/orthocluster_analysis/out/genome_pfal_60.txt -g2 /home/cfa24/research/orthocluster_analysis/out/genome_pviv_60.txt -d /home/cfa24/research/orthocluster_ana	30	45	27	439	428	7	460	5	424	177.481	176.074	0	0	0	0	2	44	0	0	1	43	1	59	2	129	0	0	3	263	2	192	1	106	0	0	0	0	0	0	2	290	1	156	1	163	1	174	0	0
-m /home/cfa24/research/orthocluster_analysis/out/mapping_pfal_pviv_60.txt -g1 /home/cfa24/research/orthocluster_analysis/out/genome_pfal_60.txt -g2 /home/cfa24/research/orthocluster_analysis/out/genome_pviv_60.txt -d /home/cfa24/research/orthocluster_ana	30	50	27	439	428	7	460	5	424	177.481	176.074	0	0	0	0	2	44	0	0	1	43	1	59	2	129	0	0	3	263	2	192	1	106	0	0	0	0	0	0	2	290	1	156	1	163	1	174	0	0
-m /home/cfa24/research/orthocluster_analysis/out/mapping_pfal_pviv_60.txt -g1 /home/cfa24/research/orthocluster_analysis/out/genome_pfal_60.txt -g2 /home/cfa24/research/orthocluster_analysis/out/genome_pviv_60.txt -d /home/cfa24/research/orthocluster_ana	30	55	27	439	428	7	460	5	424	177.481	176.074	0	0	0	0	2	44	0	0	1	43	1	59	2	129	0	0	3	263	2	192	1	106	0	0	0	0	0	0	2	290	1	156	1	163	1	174	0	0
-m /home/cfa24/research/orthocluster_analysis/out/mapping_pfal_pviv_60.txt -g1 /home/cfa24/research/orthocluster_analysis/out/genome_pfal_60.txt -g2 /home/cfa24/research/orthocluster_analysis/out/genome_pviv_60.txt -d /home/cfa24/research/orthocluster_ana	30	60	27	439	428	7	460	5	424	177.481	176.074	0	0	0	0	2	44	0	0	1	43	1	59	2	129	0	0	3	263	2	192	1	106	0	0	0	0	0	0	2	290	1	156	1	163	1	174	0	0
-m /home/cfa24/research/orthocluster_analysis/out/mapping_pfal_pviv_60.txt -g1 /home/cfa24/research/orthocluster_analysis/out/genome_pfal_60.txt -g2 /home/cfa24/research/orthocluster_analysis/out/genome_pviv_60.txt -d /home/cfa24/research/orthocluster_ana	30	65	27	439	428	7	460	5	424	177.481	176.074	0	0	0	0	2	44	0	0	1	43	1	59	2	129	0	0	3	263	2	192	1	106	0	0	0	0	0	0	2	290	1	156	1	163	1	174	0	0
-m /home/cfa24/research/orthocluster_analysis/out/mapping_pfal_pviv_60.txt -g1 /home/cfa24/research/orthocluster_analysis/out/genome_pfal_60.txt -g2 /home/cfa24/research/orthocluster_analysis/out/genome_pviv_60.txt -d /home/cfa24/research/orthocluster_ana	30	70	27	439	428	7	460	5	424	177.481	176.074	0	0	0	0	2	44	0	0	1	43	1	59	2	129	0	0	3	263	2	192	1	106	0	0	0	0	0	0	2	290	1	156	1	163	1	174	0	0
-m /home/cfa24/research/orthocluster_analysis/out/mapping_pfal_pviv_60.txt -g1 /home/cfa24/research/orthocluster_analysis/out/genome_pfal_60.txt -g2 /home/cfa24/research/orthocluster_analysis/out/genome_pviv_60.txt -d /home/cfa24/research/orthocluster_ana	30	75	27	439	428	7	460	5	424	177.481	176.074	0	0	0	0	2	44	0	0	1	43	1	59	2	129	0	0	3	263	2	192	1	106	0	0	0	0	0	0	2	290	1	156	1	163	1	174	0	0
-m /home/cfa24/research/orthocluster_analysis/out/mapping_pfal_pviv_60.txt -g1 /home/cfa24/research/orthocluster_analysis/out/genome_pfal_60.txt -g2 /home/cfa24/research/orthocluster_analysis/out/genome_pviv_60.txt -d /home/cfa24/research/orthocluster_ana	30	80	27	439	428	7	460	5	424	177.481	176.074	0	0	0	0	2	44	0	0	1	43	1	59	2	129	0	0	3	263	2	192	1	106	0	0	0	0	0	0	2	290	1	156	1	163	1	174	0	0
-m /home/cfa24/research/orthocluster_analysis/out/mapping_pfal_pviv_60.txt -g1 /home/cfa24/research/orthocluster_analysis/out/genome_pfal_60.txt -g2 /home/cfa24/research/orthocluster_analysis/out/genome_pviv_60.txt -d /home/cfa24/research/orthocluster_ana	35	0	406	50	50	1	0	1	0	10.5025	10.5025	254	1315	106	1606	30	732	12	422	4	189	0	0	0	0	0	0	0	0	0	0	0	0	0	0	0	0	0	0	0	0	0	0	0	0	0	0	0	0
-m /home/cfa24/research/orthocluster_analysis/out/mapping_pfal_pviv_60.txt -g1 /home/cfa24/research/orthocluster_analysis/out/genome_pfal_60.txt -g2 /home/cfa24/research/orthocluster_analysis/out/genome_pviv_60.txt -d /home/cfa24/research/orthocluster_ana	35	5	243	167	169	1	135	1	112	18.177	18.0823	151	719	26	391	28	679	8	263	8	368	1	59	5	313	3	227	3	249	2	183	5	520	1	113	0	0	0	0	0	0	0	0	2	333	0	0	0	0
-m /home/cfa24/research/orthocluster_analysis/out/mapping_pfal_pviv_60.txt -g1 /home/cfa24/research/orthocluster_analysis/out/genome_pfal_60.txt -g2 /home/cfa24/research/orthocluster_analysis/out/genome_pviv_60.txt -d /home/cfa24/research/orthocluster_ana	35	10	56	427	418	6	377	4	317	83.8571	82.75	19	97	7	94	5	127	2	67	4	177	1	53	2	129	0	0	0	0	0	0	1	106	0	0	1	126	0	0	3	430	0	0	1	163	0	0	0	0
-m /home/cfa24/research/orthocluster_analysis/out/mapping_pfal_pviv_60.txt -g1 /home/cfa24/research/orthocluster_analysis/out/genome_pfal_60.txt -g2 /home/cfa24/research/orthocluster_analysis/out/genome_pviv_60.txt -d /home/cfa24/research/orthocluster_ana	35	15	34	439	428	7	439	5	375	140.176	138.235	4	16	2	25	3	69	0	0	3	128	0	0	3	197	0	0	2	176	1	93	1	106	0	0	0	0	0	0	2	290	1	156	1	163	1	174	0	0
-m /home/cfa24/research/orthocluster_analysis/out/mapping_pfal_pviv_60.txt -g1 /home/cfa24/research/orthocluster_analysis/out/genome_pfal_60.txt -g2 /home/cfa24/research/orthocluster_analysis/out/genome_pviv_60.txt -d /home/cfa24/research/orthocluster_ana	35	20	29	439	428	7	455	5	389	165	162.655	1	2	0	0	3	69	0	0	1	43	1	57	3	196	0	0	3	263	1	93	1	106	0	0	0	0	0	0	2	290	1	156	1	163	1	174	0	0
-m /home/cfa24/research/orthocluster_analysis/out/mapping_pfal_pviv_60.txt -g1 /home/cfa24/research/orthocluster_analysis/out/genome_pfal_60.txt -g2 /home/cfa24/research/orthocluster_analysis/out/genome_pviv_60.txt -d /home/cfa24/research/orthocluster_ana	35	25	28	439	428	7	458	5	393	171.071	168.679	0	0	0	0	3	69	0	0	1	43	1	59	2	129	1	72	3	263	1	93	1	106	0	0	0	0	0	0	2	290	1	156	1	163	1	174	0	0
-m /home/cfa24/research/orthocluster_analysis/out/mapping_pfal_pviv_60.txt -g1 /home/cfa24/research/orthocluster_analysis/out/genome_pfal_60.txt -g2 /home/cfa24/research/orthocluster_analysis/out/genome_pviv_60.txt -d /home/cfa24/research/orthocluster_ana	35	30	28	439	428	7	458	5	393	171.071	168.679	0	0	0	0	3	69	0	0	1	43	1	59	2	129	1	72	3	263	1	93	1	106	0	0	0	0	0	0	2	290	1	156	1	163	1	174	0	0
-m /home/cfa24/research/orthocluster_analysis/out/mapping_pfal_pviv_60.txt -g1 /home/cfa24/research/orthocluster_analysis/out/genome_pfal_60.txt -g2 /home/cfa24/research/orthocluster_analysis/out/genome_pviv_60.txt -d /home/cfa24/research/orthocluster_ana	35	35	28	439	428	7	458	5	422	171.071	169.714	1	3	0	0	2	44	0	0	1	43	1	59	2	129	0	0	3	263	2	187	1	106	0	0	0	0	0	0	2	290	1	156	1	163	1	174	0	0
-m /home/cfa24/research/orthocluster_analysis/out/mapping_pfal_pviv_60.txt -g1 /home/cfa24/research/orthocluster_analysis/out/genome_pfal_60.txt -g2 /home/cfa24/research/orthocluster_analysis/out/genome_pviv_60.txt -d /home/cfa24/research/orthocluster_ana	35	40	27	439	428	7	460	5	424	177.481	176.074	0	0	0	0	2	44	0	0	1	43	1	59	2	129	0	0	3	263	2	192	1	106	0	0	0	0	0	0	2	290	1	156	1	163	1	174	0	0
-m /home/cfa24/research/orthocluster_analysis/out/mapping_pfal_pviv_60.txt -g1 /home/cfa24/research/orthocluster_analysis/out/genome_pfal_60.txt -g2 /home/cfa24/research/orthocluster_analysis/out/genome_pviv_60.txt -d /home/cfa24/research/orthocluster_ana	35	45	27	439	428	7	460	5	424	177.481	176.074	0	0	0	0	2	44	0	0	1	43	1	59	2	129	0	0	3	263	2	192	1	106	0	0	0	0	0	0	2	290	1	156	1	163	1	174	0	0
-m /home/cfa24/research/orthocluster_analysis/out/mapping_pfal_pviv_60.txt -g1 /home/cfa24/research/orthocluster_analysis/out/genome_pfal_60.txt -g2 /home/cfa24/research/orthocluster_analysis/out/genome_pviv_60.txt -d /home/cfa24/research/orthocluster_ana	35	50	27	439	428	7	460	5	424	177.481	176.074	0	0	0	0	2	44	0	0	1	43	1	59	2	129	0	0	3	263	2	192	1	106	0	0	0	0	0	0	2	290	1	156	1	163	1	174	0	0
-m /home/cfa24/research/orthocluster_analysis/out/mapping_pfal_pviv_60.txt -g1 /home/cfa24/research/orthocluster_analysis/out/genome_pfal_60.txt -g2 /home/cfa24/research/orthocluster_analysis/out/genome_pviv_60.txt -d /home/cfa24/research/orthocluster_ana	35	55	27	439	428	7	460	5	424	177.481	176.074	0	0	0	0	2	44	0	0	1	43	1	59	2	129	0	0	3	263	2	192	1	106	0	0	0	0	0	0	2	290	1	156	1	163	1	174	0	0
-m /home/cfa24/research/orthocluster_analysis/out/mapping_pfal_pviv_60.txt -g1 /home/cfa24/research/orthocluster_analysis/out/genome_pfal_60.txt -g2 /home/cfa24/research/orthocluster_analysis/out/genome_pviv_60.txt -d /home/cfa24/research/orthocluster_ana	35	60	27	439	428	7	460	5	424	177.481	176.074	0	0	0	0	2	44	0	0	1	43	1	59	2	129	0	0	3	263	2	192	1	106	0	0	0	0	0	0	2	290	1	156	1	163	1	174	0	0
-m /home/cfa24/research/orthocluster_analysis/out/mapping_pfal_pviv_60.txt -g1 /home/cfa24/research/orthocluster_analysis/out/genome_pfal_60.txt -g2 /home/cfa24/research/orthocluster_analysis/out/genome_pviv_60.txt -d /home/cfa24/research/orthocluster_ana	35	65	27	439	428	7	460	5	424	177.481	176.074	0	0	0	0	2	44	0	0	1	43	1	59	2	129	0	0	3	263	2	192	1	106	0	0	0	0	0	0	2	290	1	156	1	163	1	174	0	0
-m /home/cfa24/research/orthocluster_analysis/out/mapping_pfal_pviv_60.txt -g1 /home/cfa24/research/orthocluster_analysis/out/genome_pfal_60.txt -g2 /home/cfa24/research/orthocluster_analysis/out/genome_pviv_60.txt -d /home/cfa24/research/orthocluster_ana	35	70	27	439	428	7	460	5	424	177.481	176.074	0	0	0	0	2	44	0	0	1	43	1	59	2	129	0	0	3	263	2	192	1	106	0	0	0	0	0	0	2	290	1	156	1	163	1	174	0	0
-m /home/cfa24/research/orthocluster_analysis/out/mapping_pfal_pviv_60.txt -g1 /home/cfa24/research/orthocluster_analysis/out/genome_pfal_60.txt -g2 /home/cfa24/research/orthocluster_analysis/out/genome_pviv_60.txt -d /home/cfa24/research/orthocluster_ana	35	75	27	439	428	7	460	5	424	177.481	176.074	0	0	0	0	2	44	0	0	1	43	1	59	2	129	0	0	3	263	2	192	1	106	0	0	0	0	0	0	2	290	1	156	1	163	1	174	0	0
-m /home/cfa24/research/orthocluster_analysis/out/mapping_pfal_pviv_60.txt -g1 /home/cfa24/research/orthocluster_analysis/out/genome_pfal_60.txt -g2 /home/cfa24/research/orthocluster_analysis/out/genome_pviv_60.txt -d /home/cfa24/research/orthocluster_ana	35	80	27	439	428	7	460	5	424	177.481	176.074	0	0	0	0	2	44	0	0	1	43	1	59	2	129	0	0	3	263	2	192	1	106	0	0	0	0	0	0	2	290	1	156	1	163	1	174	0	0
-m /home/cfa24/research/orthocluster_analysis/out/mapping_pfal_pviv_60.txt -g1 /home/cfa24/research/orthocluster_analysis/out/genome_pfal_60.txt -g2 /home/cfa24/research/orthocluster_analysis/out/genome_pviv_60.txt -d /home/cfa24/research/orthocluster_ana	40	0	406	50	50	1	0	1	0	10.5025	10.5025	254	1315	106	1606	30	732	12	422	4	189	0	0	0	0	0	0	0	0	0	0	0	0	0	0	0	0	0	0	0	0	0	0	0	0	0	0	0	0
-m /home/cfa24/research/orthocluster_analysis/out/mapping_pfal_pviv_60.txt -g1 /home/cfa24/research/orthocluster_analysis/out/genome_pfal_60.txt -g2 /home/cfa24/research/orthocluster_analysis/out/genome_pviv_60.txt -d /home/cfa24/research/orthocluster_ana	40	5	243	167	169	1	135	1	112	18.177	18.0823	151	719	26	391	28	679	8	263	8	368	1	59	5	313	3	227	3	249	2	183	5	520	1	113	0	0	0	0	0	0	0	0	2	333	0	0	0	0
-m /home/cfa24/research/orthocluster_analysis/out/mapping_pfal_pviv_60.txt -g1 /home/cfa24/research/orthocluster_analysis/out/genome_pfal_60.txt -g2 /home/cfa24/research/orthocluster_analysis/out/genome_pviv_60.txt -d /home/cfa24/research/orthocluster_ana	40	10	56	427	418	6	377	4	317	83.8571	82.75	19	97	7	94	5	127	2	67	4	177	1	53	2	129	0	0	0	0	0	0	1	106	0	0	1	126	0	0	3	430	0	0	1	163	0	0	0	0
-m /home/cfa24/research/orthocluster_analysis/out/mapping_pfal_pviv_60.txt -g1 /home/cfa24/research/orthocluster_analysis/out/genome_pfal_60.txt -g2 /home/cfa24/research/orthocluster_analysis/out/genome_pviv_60.txt -d /home/cfa24/research/orthocluster_ana	40	15	34	439	428	7	439	5	375	140.176	138.235	4	16	2	25	3	69	0	0	3	128	0	0	3	197	0	0	2	176	1	93	1	106	0	0	0	0	0	0	2	290	1	156	1	163	1	174	0	0
-m /home/cfa24/research/orthocluster_analysis/out/mapping_pfal_pviv_60.txt -g1 /home/cfa24/research/orthocluster_analysis/out/genome_pfal_60.txt -g2 /home/cfa24/research/orthocluster_analysis/out/genome_pviv_60.txt -d /home/cfa24/research/orthocluster_ana	40	20	29	439	428	7	455	5	389	165	162.655	1	2	0	0	3	69	0	0	1	43	1	57	3	196	0	0	3	263	1	93	1	106	0	0	0	0	0	0	2	290	1	156	1	163	1	174	0	0
-m /home/cfa24/research/orthocluster_analysis/out/mapping_pfal_pviv_60.txt -g1 /home/cfa24/research/orthocluster_analysis/out/genome_pfal_60.txt -g2 /home/cfa24/research/orthocluster_analysis/out/genome_pviv_60.txt -d /home/cfa24/research/orthocluster_ana	40	25	28	439	428	7	458	5	393	171.071	168.679	0	0	0	0	3	69	0	0	1	43	1	59	2	129	1	72	3	263	1	93	1	106	0	0	0	0	0	0	2	290	1	156	1	163	1	174	0	0
-m /home/cfa24/research/orthocluster_analysis/out/mapping_pfal_pviv_60.txt -g1 /home/cfa24/research/orthocluster_analysis/out/genome_pfal_60.txt -g2 /home/cfa24/research/orthocluster_analysis/out/genome_pviv_60.txt -d /home/cfa24/research/orthocluster_ana	40	30	28	439	428	7	458	5	393	171.071	168.679	0	0	0	0	3	69	0	0	1	43	1	59	2	129	1	72	3	263	1	93	1	106	0	0	0	0	0	0	2	290	1	156	1	163	1	174	0	0
-m /home/cfa24/research/orthocluster_analysis/out/mapping_pfal_pviv_60.txt -g1 /home/cfa24/research/orthocluster_analysis/out/genome_pfal_60.txt -g2 /home/cfa24/research/orthocluster_analysis/out/genome_pviv_60.txt -d /home/cfa24/research/orthocluster_ana	40	35	28	439	428	7	458	5	422	171.071	169.714	1	3	0	0	2	44	0	0	1	43	1	59	2	129	0	0	3	263	2	187	1	106	0	0	0	0	0	0	2	290	1	156	1	163	1	174	0	0
-m /home/cfa24/research/orthocluster_analysis/out/mapping_pfal_pviv_60.txt -g1 /home/cfa24/research/orthocluster_analysis/out/genome_pfal_60.txt -g2 /home/cfa24/research/orthocluster_analysis/out/genome_pviv_60.txt -d /home/cfa24/research/orthocluster_ana	40	40	27	439	428	7	460	5	424	177.481	176.074	0	0	0	0	2	44	0	0	1	43	1	59	2	129	0	0	3	263	2	192	1	106	0	0	0	0	0	0	2	290	1	156	1	163	1	174	0	0
-m /home/cfa24/research/orthocluster_analysis/out/mapping_pfal_pviv_60.txt -g1 /home/cfa24/research/orthocluster_analysis/out/genome_pfal_60.txt -g2 /home/cfa24/research/orthocluster_analysis/out/genome_pviv_60.txt -d /home/cfa24/research/orthocluster_ana	40	45	27	439	428	7	460	5	424	177.481	176.074	0	0	0	0	2	44	0	0	1	43	1	59	2	129	0	0	3	263	2	192	1	106	0	0	0	0	0	0	2	290	1	156	1	163	1	174	0	0
-m /home/cfa24/research/orthocluster_analysis/out/mapping_pfal_pviv_60.txt -g1 /home/cfa24/research/orthocluster_analysis/out/genome_pfal_60.txt -g2 /home/cfa24/research/orthocluster_analysis/out/genome_pviv_60.txt -d /home/cfa24/research/orthocluster_ana	40	50	27	439	428	7	460	5	424	177.481	176.074	0	0	0	0	2	44	0	0	1	43	1	59	2	129	0	0	3	263	2	192	1	106	0	0	0	0	0	0	2	290	1	156	1	163	1	174	0	0
-m /home/cfa24/research/orthocluster_analysis/out/mapping_pfal_pviv_60.txt -g1 /home/cfa24/research/orthocluster_analysis/out/genome_pfal_60.txt -g2 /home/cfa24/research/orthocluster_analysis/out/genome_pviv_60.txt -d /home/cfa24/research/orthocluster_ana	40	55	27	439	428	7	460	5	424	177.481	176.074	0	0	0	0	2	44	0	0	1	43	1	59	2	129	0	0	3	263	2	192	1	106	0	0	0	0	0	0	2	290	1	156	1	163	1	174	0	0
-m /home/cfa24/research/orthocluster_analysis/out/mapping_pfal_pviv_60.txt -g1 /home/cfa24/research/orthocluster_analysis/out/genome_pfal_60.txt -g2 /home/cfa24/research/orthocluster_analysis/out/genome_pviv_60.txt -d /home/cfa24/research/orthocluster_ana	40	60	27	439	428	7	460	5	424	177.481	176.074	0	0	0	0	2	44	0	0	1	43	1	59	2	129	0	0	3	263	2	192	1	106	0	0	0	0	0	0	2	290	1	156	1	163	1	174	0	0
-m /home/cfa24/research/orthocluster_analysis/out/mapping_pfal_pviv_60.txt -g1 /home/cfa24/research/orthocluster_analysis/out/genome_pfal_60.txt -g2 /home/cfa24/research/orthocluster_analysis/out/genome_pviv_60.txt -d /home/cfa24/research/orthocluster_ana	40	65	27	439	428	7	460	5	424	177.481	176.074	0	0	0	0	2	44	0	0	1	43	1	59	2	129	0	0	3	263	2	192	1	106	0	0	0	0	0	0	2	290	1	156	1	163	1	174	0	0
-m /home/cfa24/research/orthocluster_analysis/out/mapping_pfal_pviv_60.txt -g1 /home/cfa24/research/orthocluster_analysis/out/genome_pfal_60.txt -g2 /home/cfa24/research/orthocluster_analysis/out/genome_pviv_60.txt -d /home/cfa24/research/orthocluster_ana	40	70	27	439	428	7	460	5	424	177.481	176.074	0	0	0	0	2	44	0	0	1	43	1	59	2	129	0	0	3	263	2	192	1	106	0	0	0	0	0	0	2	290	1	156	1	163	1	174	0	0
-m /home/cfa24/research/orthocluster_analysis/out/mapping_pfal_pviv_60.txt -g1 /home/cfa24/research/orthocluster_analysis/out/genome_pfal_60.txt -g2 /home/cfa24/research/orthocluster_analysis/out/genome_pviv_60.txt -d /home/cfa24/research/orthocluster_ana	40	75	27	439	428	7	460	5	424	177.481	176.074	0	0	0	0	2	44	0	0	1	43	1	59	2	129	0	0	3	263	2	192	1	106	0	0	0	0	0	0	2	290	1	156	1	163	1	174	0	0
-m /home/cfa24/research/orthocluster_analysis/out/mapping_pfal_pviv_60.txt -g1 /home/cfa24/research/orthocluster_analysis/out/genome_pfal_60.txt -g2 /home/cfa24/research/orthocluster_analysis/out/genome_pviv_60.txt -d /home/cfa24/research/orthocluster_ana	40	80	27	439	428	7	460	5	424	177.481	176.074	0	0	0	0	2	44	0	0	1	43	1	59	2	129	0	0	3	263	2	192	1	106	0	0	0	0	0	0	2	290	1	156	1	163	1	174	0	0
-m /home/cfa24/research/orthocluster_analysis/out/mapping_pfal_pviv_60.txt -g1 /home/cfa24/research/orthocluster_analysis/out/genome_pfal_60.txt -g2 /home/cfa24/research/orthocluster_analysis/out/genome_pviv_60.txt -d /home/cfa24/research/orthocluster_ana	45	0	406	50	50	1	0	1	0	10.5025	10.5025	254	1315	106	1606	30	732	12	422	4	189	0	0	0	0	0	0	0	0	0	0	0	0	0	0	0	0	0	0	0	0	0	0	0	0	0	0	0	0
-m /home/cfa24/research/orthocluster_analysis/out/mapping_pfal_pviv_60.txt -g1 /home/cfa24/research/orthocluster_analysis/out/genome_pfal_60.txt -g2 /home/cfa24/research/orthocluster_analysis/out/genome_pviv_60.txt -d /home/cfa24/research/orthocluster_ana	45	5	243	167	169	1	135	1	112	18.177	18.0823	151	719	26	391	28	679	8	263	8	368	1	59	5	313	3	227	3	249	2	183	5	520	1	113	0	0	0	0	0	0	0	0	2	333	0	0	0	0
-m /home/cfa24/research/orthocluster_analysis/out/mapping_pfal_pviv_60.txt -g1 /home/cfa24/research/orthocluster_analysis/out/genome_pfal_60.txt -g2 /home/cfa24/research/orthocluster_analysis/out/genome_pviv_60.txt -d /home/cfa24/research/orthocluster_ana	45	10	56	427	418	6	377	4	317	83.8571	82.75	19	97	7	94	5	127	2	67	4	177	1	53	2	129	0	0	0	0	0	0	1	106	0	0	1	126	0	0	3	430	0	0	1	163	0	0	0	0
-m /home/cfa24/research/orthocluster_analysis/out/mapping_pfal_pviv_60.txt -g1 /home/cfa24/research/orthocluster_analysis/out/genome_pfal_60.txt -g2 /home/cfa24/research/orthocluster_analysis/out/genome_pviv_60.txt -d /home/cfa24/research/orthocluster_ana	45	15	34	439	428	7	439	5	375	140.176	138.235	4	16	2	25	3	69	0	0	3	128	0	0	3	197	0	0	2	176	1	93	1	106	0	0	0	0	0	0	2	290	1	156	1	163	1	174	0	0
-m /home/cfa24/research/orthocluster_analysis/out/mapping_pfal_pviv_60.txt -g1 /home/cfa24/research/orthocluster_analysis/out/genome_pfal_60.txt -g2 /home/cfa24/research/orthocluster_analysis/out/genome_pviv_60.txt -d /home/cfa24/research/orthocluster_ana	45	20	29	439	428	7	455	5	389	165	162.655	1	2	0	0	3	69	0	0	1	43	1	57	3	196	0	0	3	263	1	93	1	106	0	0	0	0	0	0	2	290	1	156	1	163	1	174	0	0
-m /home/cfa24/research/orthocluster_analysis/out/mapping_pfal_pviv_60.txt -g1 /home/cfa24/research/orthocluster_analysis/out/genome_pfal_60.txt -g2 /home/cfa24/research/orthocluster_analysis/out/genome_pviv_60.txt -d /home/cfa24/research/orthocluster_ana	45	25	28	439	428	7	458	5	393	171.071	168.679	0	0	0	0	3	69	0	0	1	43	1	59	2	129	1	72	3	263	1	93	1	106	0	0	0	0	0	0	2	290	1	156	1	163	1	174	0	0
-m /home/cfa24/research/orthocluster_analysis/out/mapping_pfal_pviv_60.txt -g1 /home/cfa24/research/orthocluster_analysis/out/genome_pfal_60.txt -g2 /home/cfa24/research/orthocluster_analysis/out/genome_pviv_60.txt -d /home/cfa24/research/orthocluster_ana	45	30	28	439	428	7	458	5	393	171.071	168.679	0	0	0	0	3	69	0	0	1	43	1	59	2	129	1	72	3	263	1	93	1	106	0	0	0	0	0	0	2	290	1	156	1	163	1	174	0	0
-m /home/cfa24/research/orthocluster_analysis/out/mapping_pfal_pviv_60.txt -g1 /home/cfa24/research/orthocluster_analysis/out/genome_pfal_60.txt -g2 /home/cfa24/research/orthocluster_analysis/out/genome_pviv_60.txt -d /home/cfa24/research/orthocluster_ana	45	35	28	439	428	7	458	5	422	171.071	169.714	1	3	0	0	2	44	0	0	1	43	1	59	2	129	0	0	3	263	2	187	1	106	0	0	0	0	0	0	2	290	1	156	1	163	1	174	0	0
-m /home/cfa24/research/orthocluster_analysis/out/mapping_pfal_pviv_60.txt -g1 /home/cfa24/research/orthocluster_analysis/out/genome_pfal_60.txt -g2 /home/cfa24/research/orthocluster_analysis/out/genome_pviv_60.txt -d /home/cfa24/research/orthocluster_ana	45	40	27	439	428	7	460	5	424	177.481	176.074	0	0	0	0	2	44	0	0	1	43	1	59	2	129	0	0	3	263	2	192	1	106	0	0	0	0	0	0	2	290	1	156	1	163	1	174	0	0
-m /home/cfa24/research/orthocluster_analysis/out/mapping_pfal_pviv_60.txt -g1 /home/cfa24/research/orthocluster_analysis/out/genome_pfal_60.txt -g2 /home/cfa24/research/orthocluster_analysis/out/genome_pviv_60.txt -d /home/cfa24/research/orthocluster_ana	45	45	27	439	428	7	460	5	424	177.481	176.074	0	0	0	0	2	44	0	0	1	43	1	59	2	129	0	0	3	263	2	192	1	106	0	0	0	0	0	0	2	290	1	156	1	163	1	174	0	0
-m /home/cfa24/research/orthocluster_analysis/out/mapping_pfal_pviv_60.txt -g1 /home/cfa24/research/orthocluster_analysis/out/genome_pfal_60.txt -g2 /home/cfa24/research/orthocluster_analysis/out/genome_pviv_60.txt -d /home/cfa24/research/orthocluster_ana	45	50	27	439	428	7	460	5	424	177.481	176.074	0	0	0	0	2	44	0	0	1	43	1	59	2	129	0	0	3	263	2	192	1	106	0	0	0	0	0	0	2	290	1	156	1	163	1	174	0	0
-m /home/cfa24/research/orthocluster_analysis/out/mapping_pfal_pviv_60.txt -g1 /home/cfa24/research/orthocluster_analysis/out/genome_pfal_60.txt -g2 /home/cfa24/research/orthocluster_analysis/out/genome_pviv_60.txt -d /home/cfa24/research/orthocluster_ana	45	55	27	439	428	7	460	5	424	177.481	176.074	0	0	0	0	2	44	0	0	1	43	1	59	2	129	0	0	3	263	2	192	1	106	0	0	0	0	0	0	2	290	1	156	1	163	1	174	0	0
-m /home/cfa24/research/orthocluster_analysis/out/mapping_pfal_pviv_60.txt -g1 /home/cfa24/research/orthocluster_analysis/out/genome_pfal_60.txt -g2 /home/cfa24/research/orthocluster_analysis/out/genome_pviv_60.txt -d /home/cfa24/research/orthocluster_ana	45	60	27	439	428	7	460	5	424	177.481	176.074	0	0	0	0	2	44	0	0	1	43	1	59	2	129	0	0	3	263	2	192	1	106	0	0	0	0	0	0	2	290	1	156	1	163	1	174	0	0
-m /home/cfa24/research/orthocluster_analysis/out/mapping_pfal_pviv_60.txt -g1 /home/cfa24/research/orthocluster_analysis/out/genome_pfal_60.txt -g2 /home/cfa24/research/orthocluster_analysis/out/genome_pviv_60.txt -d /home/cfa24/research/orthocluster_ana	45	65	27	439	428	7	460	5	424	177.481	176.074	0	0	0	0	2	44	0	0	1	43	1	59	2	129	0	0	3	263	2	192	1	106	0	0	0	0	0	0	2	290	1	156	1	163	1	174	0	0
-m /home/cfa24/research/orthocluster_analysis/out/mapping_pfal_pviv_60.txt -g1 /home/cfa24/research/orthocluster_analysis/out/genome_pfal_60.txt -g2 /home/cfa24/research/orthocluster_analysis/out/genome_pviv_60.txt -d /home/cfa24/research/orthocluster_ana	45	70	27	439	428	7	460	5	424	177.481	176.074	0	0	0	0	2	44	0	0	1	43	1	59	2	129	0	0	3	263	2	192	1	106	0	0	0	0	0	0	2	290	1	156	1	163	1	174	0	0
-m /home/cfa24/research/orthocluster_analysis/out/mapping_pfal_pviv_60.txt -g1 /home/cfa24/research/orthocluster_analysis/out/genome_pfal_60.txt -g2 /home/cfa24/research/orthocluster_analysis/out/genome_pviv_60.txt -d /home/cfa24/research/orthocluster_ana	45	75	27	439	428	7	460	5	424	177.481	176.074	0	0	0	0	2	44	0	0	1	43	1	59	2	129	0	0	3	263	2	192	1	106	0	0	0	0	0	0	2	290	1	156	1	163	1	174	0	0
-m /home/cfa24/research/orthocluster_analysis/out/mapping_pfal_pviv_60.txt -g1 /home/cfa24/research/orthocluster_analysis/out/genome_pfal_60.txt -g2 /home/cfa24/research/orthocluster_analysis/out/genome_pviv_60.txt -d /home/cfa24/research/orthocluster_ana	45	80	27	439	428	7	460	5	424	177.481	176.074	0	0	0	0	2	44	0	0	1	43	1	59	2	129	0	0	3	263	2	192	1	106	0	0	0	0	0	0	2	290	1	156	1	163	1	174	0	0
-m /home/cfa24/research/orthocluster_analysis/out/mapping_pfal_pviv_60.txt -g1 /home/cfa24/research/orthocluster_analysis/out/genome_pfal_60.txt -g2 /home/cfa24/research/orthocluster_analysis/out/genome_pviv_60.txt -d /home/cfa24/research/orthocluster_ana	50	0	406	50	50	1	0	1	0	10.5025	10.5025	254	1315	106	1606	30	732	12	422	4	189	0	0	0	0	0	0	0	0	0	0	0	0	0	0	0	0	0	0	0	0	0	0	0	0	0	0	0	0
-m /home/cfa24/research/orthocluster_analysis/out/mapping_pfal_pviv_60.txt -g1 /home/cfa24/research/orthocluster_analysis/out/genome_pfal_60.txt -g2 /home/cfa24/research/orthocluster_analysis/out/genome_pviv_60.txt -d /home/cfa24/research/orthocluster_ana	50	5	243	167	169	1	135	1	112	18.177	18.0823	151	719	26	391	28	679	8	263	8	368	1	59	5	313	3	227	3	249	2	183	5	520	1	113	0	0	0	0	0	0	0	0	2	333	0	0	0	0
-m /home/cfa24/research/orthocluster_analysis/out/mapping_pfal_pviv_60.txt -g1 /home/cfa24/research/orthocluster_analysis/out/genome_pfal_60.txt -g2 /home/cfa24/research/orthocluster_analysis/out/genome_pviv_60.txt -d /home/cfa24/research/orthocluster_ana	50	10	56	427	418	6	377	4	317	83.8571	82.75	19	97	7	94	5	127	2	67	4	177	1	53	2	129	0	0	0	0	0	0	1	106	0	0	1	126	0	0	3	430	0	0	1	163	0	0	0	0
-m /home/cfa24/research/orthocluster_analysis/out/mapping_pfal_pviv_60.txt -g1 /home/cfa24/research/orthocluster_analysis/out/genome_pfal_60.txt -g2 /home/cfa24/research/orthocluster_analysis/out/genome_pviv_60.txt -d /home/cfa24/research/orthocluster_ana	50	15	34	439	428	7	439	5	375	140.176	138.235	4	16	2	25	3	69	0	0	3	128	0	0	3	197	0	0	2	176	1	93	1	106	0	0	0	0	0	0	2	290	1	156	1	163	1	174	0	0
-m /home/cfa24/research/orthocluster_analysis/out/mapping_pfal_pviv_60.txt -g1 /home/cfa24/research/orthocluster_analysis/out/genome_pfal_60.txt -g2 /home/cfa24/research/orthocluster_analysis/out/genome_pviv_60.txt -d /home/cfa24/research/orthocluster_ana	50	20	29	439	428	7	455	5	389	165	162.655	1	2	0	0	3	69	0	0	1	43	1	57	3	196	0	0	3	263	1	93	1	106	0	0	0	0	0	0	2	290	1	156	1	163	1	174	0	0
-m /home/cfa24/research/orthocluster_analysis/out/mapping_pfal_pviv_60.txt -g1 /home/cfa24/research/orthocluster_analysis/out/genome_pfal_60.txt -g2 /home/cfa24/research/orthocluster_analysis/out/genome_pviv_60.txt -d /home/cfa24/research/orthocluster_ana	50	25	28	439	428	7	458	5	393	171.071	168.679	0	0	0	0	3	69	0	0	1	43	1	59	2	129	1	72	3	263	1	93	1	106	0	0	0	0	0	0	2	290	1	156	1	163	1	174	0	0
-m /home/cfa24/research/orthocluster_analysis/out/mapping_pfal_pviv_60.txt -g1 /home/cfa24/research/orthocluster_analysis/out/genome_pfal_60.txt -g2 /home/cfa24/research/orthocluster_analysis/out/genome_pviv_60.txt -d /home/cfa24/research/orthocluster_ana	50	30	28	439	428	7	458	5	393	171.071	168.679	0	0	0	0	3	69	0	0	1	43	1	59	2	129	1	72	3	263	1	93	1	106	0	0	0	0	0	0	2	290	1	156	1	163	1	174	0	0
-m /home/cfa24/research/orthocluster_analysis/out/mapping_pfal_pviv_60.txt -g1 /home/cfa24/research/orthocluster_analysis/out/genome_pfal_60.txt -g2 /home/cfa24/research/orthocluster_analysis/out/genome_pviv_60.txt -d /home/cfa24/research/orthocluster_ana	50	35	28	439	428	7	458	5	422	171.071	169.714	1	3	0	0	2	44	0	0	1	43	1	59	2	129	0	0	3	263	2	187	1	106	0	0	0	0	0	0	2	290	1	156	1	163	1	174	0	0
-m /home/cfa24/research/orthocluster_analysis/out/mapping_pfal_pviv_60.txt -g1 /home/cfa24/research/orthocluster_analysis/out/genome_pfal_60.txt -g2 /home/cfa24/research/orthocluster_analysis/out/genome_pviv_60.txt -d /home/cfa24/research/orthocluster_ana	50	40	27	439	428	7	460	5	424	177.481	176.074	0	0	0	0	2	44	0	0	1	43	1	59	2	129	0	0	3	263	2	192	1	106	0	0	0	0	0	0	2	290	1	156	1	163	1	174	0	0
-m /home/cfa24/research/orthocluster_analysis/out/mapping_pfal_pviv_60.txt -g1 /home/cfa24/research/orthocluster_analysis/out/genome_pfal_60.txt -g2 /home/cfa24/research/orthocluster_analysis/out/genome_pviv_60.txt -d /home/cfa24/research/orthocluster_ana	50	45	27	439	428	7	460	5	424	177.481	176.074	0	0	0	0	2	44	0	0	1	43	1	59	2	129	0	0	3	263	2	192	1	106	0	0	0	0	0	0	2	290	1	156	1	163	1	174	0	0
-m /home/cfa24/research/orthocluster_analysis/out/mapping_pfal_pviv_60.txt -g1 /home/cfa24/research/orthocluster_analysis/out/genome_pfal_60.txt -g2 /home/cfa24/research/orthocluster_analysis/out/genome_pviv_60.txt -d /home/cfa24/research/orthocluster_ana	50	50	27	439	428	7	460	5	424	177.481	176.074	0	0	0	0	2	44	0	0	1	43	1	59	2	129	0	0	3	263	2	192	1	106	0	0	0	0	0	0	2	290	1	156	1	163	1	174	0	0
-m /home/cfa24/research/orthocluster_analysis/out/mapping_pfal_pviv_60.txt -g1 /home/cfa24/research/orthocluster_analysis/out/genome_pfal_60.txt -g2 /home/cfa24/research/orthocluster_analysis/out/genome_pviv_60.txt -d /home/cfa24/research/orthocluster_ana	50	55	27	439	428	7	460	5	424	177.481	176.074	0	0	0	0	2	44	0	0	1	43	1	59	2	129	0	0	3	263	2	192	1	106	0	0	0	0	0	0	2	290	1	156	1	163	1	174	0	0
-m /home/cfa24/research/orthocluster_analysis/out/mapping_pfal_pviv_60.txt -g1 /home/cfa24/research/orthocluster_analysis/out/genome_pfal_60.txt -g2 /home/cfa24/research/orthocluster_analysis/out/genome_pviv_60.txt -d /home/cfa24/research/orthocluster_ana	50	60	27	439	428	7	460	5	424	177.481	176.074	0	0	0	0	2	44	0	0	1	43	1	59	2	129	0	0	3	263	2	192	1	106	0	0	0	0	0	0	2	290	1	156	1	163	1	174	0	0
-m /home/cfa24/research/orthocluster_analysis/out/mapping_pfal_pviv_60.txt -g1 /home/cfa24/research/orthocluster_analysis/out/genome_pfal_60.txt -g2 /home/cfa24/research/orthocluster_analysis/out/genome_pviv_60.txt -d /home/cfa24/research/orthocluster_ana	50	65	27	439	428	7	460	5	424	177.481	176.074	0	0	0	0	2	44	0	0	1	43	1	59	2	129	0	0	3	263	2	192	1	106	0	0	0	0	0	0	2	290	1	156	1	163	1	174	0	0
-m /home/cfa24/research/orthocluster_analysis/out/mapping_pfal_pviv_60.txt -g1 /home/cfa24/research/orthocluster_analysis/out/genome_pfal_60.txt -g2 /home/cfa24/research/orthocluster_analysis/out/genome_pviv_60.txt -d /home/cfa24/research/orthocluster_ana	50	70	27	439	428	7	460	5	424	177.481	176.074	0	0	0	0	2	44	0	0	1	43	1	59	2	129	0	0	3	263	2	192	1	106	0	0	0	0	0	0	2	290	1	156	1	163	1	174	0	0
-m /home/cfa24/research/orthocluster_analysis/out/mapping_pfal_pviv_60.txt -g1 /home/cfa24/research/orthocluster_analysis/out/genome_pfal_60.txt -g2 /home/cfa24/research/orthocluster_analysis/out/genome_pviv_60.txt -d /home/cfa24/research/orthocluster_ana	50	75	27	439	428	7	460	5	424	177.481	176.074	0	0	0	0	2	44	0	0	1	43	1	59	2	129	0	0	3	263	2	192	1	106	0	0	0	0	0	0	2	290	1	156	1	163	1	174	0	0
-m /home/cfa24/research/orthocluster_analysis/out/mapping_pfal_pviv_60.txt -g1 /home/cfa24/research/orthocluster_analysis/out/genome_pfal_60.txt -g2 /home/cfa24/research/orthocluster_analysis/out/genome_pviv_60.txt -d /home/cfa24/research/orthocluster_ana	50	80	27	439	428	7	460	5	424	177.481	176.074	0	0	0	0	2	44	0	0	1	43	1	59	2	129	0	0	3	263	2	192	1	106	0	0	0	0	0	0	2	290	1	156	1	163	1	174	0	0
-m /home/cfa24/research/orthocluster_analysis/out/mapping_pfal_pviv_60.txt -g1 /home/cfa24/research/orthocluster_analysis/out/genome_pfal_60.txt -g2 /home/cfa24/research/orthocluster_analysis/out/genome_pviv_60.txt -d /home/cfa24/research/orthocluster_ana	55	0	406	50	50	1	0	1	0	10.5025	10.5025	254	1315	106	1606	30	732	12	422	4	189	0	0	0	0	0	0	0	0	0	0	0	0	0	0	0	0	0	0	0	0	0	0	0	0	0	0	0	0
-m /home/cfa24/research/orthocluster_analysis/out/mapping_pfal_pviv_60.txt -g1 /home/cfa24/research/orthocluster_analysis/out/genome_pfal_60.txt -g2 /home/cfa24/research/orthocluster_analysis/out/genome_pviv_60.txt -d /home/cfa24/research/orthocluster_ana	55	5	243	167	169	1	135	1	112	18.177	18.0823	151	719	26	391	28	679	8	263	8	368	1	59	5	313	3	227	3	249	2	183	5	520	1	113	0	0	0	0	0	0	0	0	2	333	0	0	0	0
-m /home/cfa24/research/orthocluster_analysis/out/mapping_pfal_pviv_60.txt -g1 /home/cfa24/research/orthocluster_analysis/out/genome_pfal_60.txt -g2 /home/cfa24/research/orthocluster_analysis/out/genome_pviv_60.txt -d /home/cfa24/research/orthocluster_ana	55	10	56	427	418	6	377	4	317	83.8571	82.75	19	97	7	94	5	127	2	67	4	177	1	53	2	129	0	0	0	0	0	0	1	106	0	0	1	126	0	0	3	430	0	0	1	163	0	0	0	0
-m /home/cfa24/research/orthocluster_analysis/out/mapping_pfal_pviv_60.txt -g1 /home/cfa24/research/orthocluster_analysis/out/genome_pfal_60.txt -g2 /home/cfa24/research/orthocluster_analysis/out/genome_pviv_60.txt -d /home/cfa24/research/orthocluster_ana	55	15	34	439	428	7	439	5	375	140.176	138.235	4	16	2	25	3	69	0	0	3	128	0	0	3	197	0	0	2	176	1	93	1	106	0	0	0	0	0	0	2	290	1	156	1	163	1	174	0	0
-m /home/cfa24/research/orthocluster_analysis/out/mapping_pfal_pviv_60.txt -g1 /home/cfa24/research/orthocluster_analysis/out/genome_pfal_60.txt -g2 /home/cfa24/research/orthocluster_analysis/out/genome_pviv_60.txt -d /home/cfa24/research/orthocluster_ana	55	20	29	439	428	7	455	5	389	165	162.655	1	2	0	0	3	69	0	0	1	43	1	57	3	196	0	0	3	263	1	93	1	106	0	0	0	0	0	0	2	290	1	156	1	163	1	174	0	0
-m /home/cfa24/research/orthocluster_analysis/out/mapping_pfal_pviv_60.txt -g1 /home/cfa24/research/orthocluster_analysis/out/genome_pfal_60.txt -g2 /home/cfa24/research/orthocluster_analysis/out/genome_pviv_60.txt -d /home/cfa24/research/orthocluster_ana	55	25	28	439	428	7	458	5	393	171.071	168.679	0	0	0	0	3	69	0	0	1	43	1	59	2	129	1	72	3	263	1	93	1	106	0	0	0	0	0	0	2	290	1	156	1	163	1	174	0	0
-m /home/cfa24/research/orthocluster_analysis/out/mapping_pfal_pviv_60.txt -g1 /home/cfa24/research/orthocluster_analysis/out/genome_pfal_60.txt -g2 /home/cfa24/research/orthocluster_analysis/out/genome_pviv_60.txt -d /home/cfa24/research/orthocluster_ana	55	30	28	439	428	7	458	5	393	171.071	168.679	0	0	0	0	3	69	0	0	1	43	1	59	2	129	1	72	3	263	1	93	1	106	0	0	0	0	0	0	2	290	1	156	1	163	1	174	0	0
-m /home/cfa24/research/orthocluster_analysis/out/mapping_pfal_pviv_60.txt -g1 /home/cfa24/research/orthocluster_analysis/out/genome_pfal_60.txt -g2 /home/cfa24/research/orthocluster_analysis/out/genome_pviv_60.txt -d /home/cfa24/research/orthocluster_ana	55	35	28	439	428	7	458	5	422	171.071	169.714	1	3	0	0	2	44	0	0	1	43	1	59	2	129	0	0	3	263	2	187	1	106	0	0	0	0	0	0	2	290	1	156	1	163	1	174	0	0
-m /home/cfa24/research/orthocluster_analysis/out/mapping_pfal_pviv_60.txt -g1 /home/cfa24/research/orthocluster_analysis/out/genome_pfal_60.txt -g2 /home/cfa24/research/orthocluster_analysis/out/genome_pviv_60.txt -d /home/cfa24/research/orthocluster_ana	55	40	27	439	428	7	460	5	424	177.481	176.074	0	0	0	0	2	44	0	0	1	43	1	59	2	129	0	0	3	263	2	192	1	106	0	0	0	0	0	0	2	290	1	156	1	163	1	174	0	0
-m /home/cfa24/research/orthocluster_analysis/out/mapping_pfal_pviv_60.txt -g1 /home/cfa24/research/orthocluster_analysis/out/genome_pfal_60.txt -g2 /home/cfa24/research/orthocluster_analysis/out/genome_pviv_60.txt -d /home/cfa24/research/orthocluster_ana	55	45	27	439	428	7	460	5	424	177.481	176.074	0	0	0	0	2	44	0	0	1	43	1	59	2	129	0	0	3	263	2	192	1	106	0	0	0	0	0	0	2	290	1	156	1	163	1	174	0	0
-m /home/cfa24/research/orthocluster_analysis/out/mapping_pfal_pviv_60.txt -g1 /home/cfa24/research/orthocluster_analysis/out/genome_pfal_60.txt -g2 /home/cfa24/research/orthocluster_analysis/out/genome_pviv_60.txt -d /home/cfa24/research/orthocluster_ana	55	50	27	439	428	7	460	5	424	177.481	176.074	0	0	0	0	2	44	0	0	1	43	1	59	2	129	0	0	3	263	2	192	1	106	0	0	0	0	0	0	2	290	1	156	1	163	1	174	0	0
-m /home/cfa24/research/orthocluster_analysis/out/mapping_pfal_pviv_60.txt -g1 /home/cfa24/research/orthocluster_analysis/out/genome_pfal_60.txt -g2 /home/cfa24/research/orthocluster_analysis/out/genome_pviv_60.txt -d /home/cfa24/research/orthocluster_ana	55	55	27	439	428	7	460	5	424	177.481	176.074	0	0	0	0	2	44	0	0	1	43	1	59	2	129	0	0	3	263	2	192	1	106	0	0	0	0	0	0	2	290	1	156	1	163	1	174	0	0
-m /home/cfa24/research/orthocluster_analysis/out/mapping_pfal_pviv_60.txt -g1 /home/cfa24/research/orthocluster_analysis/out/genome_pfal_60.txt -g2 /home/cfa24/research/orthocluster_analysis/out/genome_pviv_60.txt -d /home/cfa24/research/orthocluster_ana	55	60	27	439	428	7	460	5	424	177.481	176.074	0	0	0	0	2	44	0	0	1	43	1	59	2	129	0	0	3	263	2	192	1	106	0	0	0	0	0	0	2	290	1	156	1	163	1	174	0	0
-m /home/cfa24/research/orthocluster_analysis/out/mapping_pfal_pviv_60.txt -g1 /home/cfa24/research/orthocluster_analysis/out/genome_pfal_60.txt -g2 /home/cfa24/research/orthocluster_analysis/out/genome_pviv_60.txt -d /home/cfa24/research/orthocluster_ana	55	65	27	439	428	7	460	5	424	177.481	176.074	0	0	0	0	2	44	0	0	1	43	1	59	2	129	0	0	3	263	2	192	1	106	0	0	0	0	0	0	2	290	1	156	1	163	1	174	0	0
-m /home/cfa24/research/orthocluster_analysis/out/mapping_pfal_pviv_60.txt -g1 /home/cfa24/research/orthocluster_analysis/out/genome_pfal_60.txt -g2 /home/cfa24/research/orthocluster_analysis/out/genome_pviv_60.txt -d /home/cfa24/research/orthocluster_ana	55	70	27	439	428	7	460	5	424	177.481	176.074	0	0	0	0	2	44	0	0	1	43	1	59	2	129	0	0	3	263	2	192	1	106	0	0	0	0	0	0	2	290	1	156	1	163	1	174	0	0
-m /home/cfa24/research/orthocluster_analysis/out/mapping_pfal_pviv_60.txt -g1 /home/cfa24/research/orthocluster_analysis/out/genome_pfal_60.txt -g2 /home/cfa24/research/orthocluster_analysis/out/genome_pviv_60.txt -d /home/cfa24/research/orthocluster_ana	55	75	27	439	428	7	460	5	424	177.481	176.074	0	0	0	0	2	44	0	0	1	43	1	59	2	129	0	0	3	263	2	192	1	106	0	0	0	0	0	0	2	290	1	156	1	163	1	174	0	0
-m /home/cfa24/research/orthocluster_analysis/out/mapping_pfal_pviv_60.txt -g1 /home/cfa24/research/orthocluster_analysis/out/genome_pfal_60.txt -g2 /home/cfa24/research/orthocluster_analysis/out/genome_pviv_60.txt -d /home/cfa24/research/orthocluster_ana	55	80	27	439	428	7	460	5	424	177.481	176.074	0	0	0	0	2	44	0	0	1	43	1	59	2	129	0	0	3	263	2	192	1	106	0	0	0	0	0	0	2	290	1	156	1	163	1	174	0	0
-m /home/cfa24/research/orthocluster_analysis/out/mapping_pfal_pviv_60.txt -g1 /home/cfa24/research/orthocluster_analysis/out/genome_pfal_60.txt -g2 /home/cfa24/research/orthocluster_analysis/out/genome_pviv_60.txt -d /home/cfa24/research/orthocluster_ana	60	0	406	50	50	1	0	1	0	10.5025	10.5025	254	1315	106	1606	30	732	12	422	4	189	0	0	0	0	0	0	0	0	0	0	0	0	0	0	0	0	0	0	0	0	0	0	0	0	0	0	0	0
-m /home/cfa24/research/orthocluster_analysis/out/mapping_pfal_pviv_60.txt -g1 /home/cfa24/research/orthocluster_analysis/out/genome_pfal_60.txt -g2 /home/cfa24/research/orthocluster_analysis/out/genome_pviv_60.txt -d /home/cfa24/research/orthocluster_ana	60	5	243	167	169	1	135	1	112	18.177	18.0823	151	719	26	391	28	679	8	263	8	368	1	59	5	313	3	227	3	249	2	183	5	520	1	113	0	0	0	0	0	0	0	0	2	333	0	0	0	0
-m /home/cfa24/research/orthocluster_analysis/out/mapping_pfal_pviv_60.txt -g1 /home/cfa24/research/orthocluster_analysis/out/genome_pfal_60.txt -g2 /home/cfa24/research/orthocluster_analysis/out/genome_pviv_60.txt -d /home/cfa24/research/orthocluster_ana	60	10	56	427	418	6	377	4	317	83.8571	82.75	19	97	7	94	5	127	2	67	4	177	1	53	2	129	0	0	0	0	0	0	1	106	0	0	1	126	0	0	3	430	0	0	1	163	0	0	0	0
-m /home/cfa24/research/orthocluster_analysis/out/mapping_pfal_pviv_60.txt -g1 /home/cfa24/research/orthocluster_analysis/out/genome_pfal_60.txt -g2 /home/cfa24/research/orthocluster_analysis/out/genome_pviv_60.txt -d /home/cfa24/research/orthocluster_ana	60	15	34	439	428	7	439	5	375	140.176	138.235	4	16	2	25	3	69	0	0	3	128	0	0	3	197	0	0	2	176	1	93	1	106	0	0	0	0	0	0	2	290	1	156	1	163	1	174	0	0
-m /home/cfa24/research/orthocluster_analysis/out/mapping_pfal_pviv_60.txt -g1 /home/cfa24/research/orthocluster_analysis/out/genome_pfal_60.txt -g2 /home/cfa24/research/orthocluster_analysis/out/genome_pviv_60.txt -d /home/cfa24/research/orthocluster_ana	60	20	29	439	428	7	455	5	389	165	162.655	1	2	0	0	3	69	0	0	1	43	1	57	3	196	0	0	3	263	1	93	1	106	0	0	0	0	0	0	2	290	1	156	1	163	1	174	0	0
-m /home/cfa24/research/orthocluster_analysis/out/mapping_pfal_pviv_60.txt -g1 /home/cfa24/research/orthocluster_analysis/out/genome_pfal_60.txt -g2 /home/cfa24/research/orthocluster_analysis/out/genome_pviv_60.txt -d /home/cfa24/research/orthocluster_ana	60	25	28	439	428	7	458	5	393	171.071	168.679	0	0	0	0	3	69	0	0	1	43	1	59	2	129	1	72	3	263	1	93	1	106	0	0	0	0	0	0	2	290	1	156	1	163	1	174	0	0
-m /home/cfa24/research/orthocluster_analysis/out/mapping_pfal_pviv_60.txt -g1 /home/cfa24/research/orthocluster_analysis/out/genome_pfal_60.txt -g2 /home/cfa24/research/orthocluster_analysis/out/genome_pviv_60.txt -d /home/cfa24/research/orthocluster_ana	60	30	28	439	428	7	458	5	393	171.071	168.679	0	0	0	0	3	69	0	0	1	43	1	59	2	129	1	72	3	263	1	93	1	106	0	0	0	0	0	0	2	290	1	156	1	163	1	174	0	0
-m /home/cfa24/research/orthocluster_analysis/out/mapping_pfal_pviv_60.txt -g1 /home/cfa24/research/orthocluster_analysis/out/genome_pfal_60.txt -g2 /home/cfa24/research/orthocluster_analysis/out/genome_pviv_60.txt -d /home/cfa24/research/orthocluster_ana	60	35	28	439	428	7	458	5	422	171.071	169.714	1	3	0	0	2	44	0	0	1	43	1	59	2	129	0	0	3	263	2	187	1	106	0	0	0	0	0	0	2	290	1	156	1	163	1	174	0	0
-m /home/cfa24/research/orthocluster_analysis/out/mapping_pfal_pviv_60.txt -g1 /home/cfa24/research/orthocluster_analysis/out/genome_pfal_60.txt -g2 /home/cfa24/research/orthocluster_analysis/out/genome_pviv_60.txt -d /home/cfa24/research/orthocluster_ana	60	40	27	439	428	7	460	5	424	177.481	176.074	0	0	0	0	2	44	0	0	1	43	1	59	2	129	0	0	3	263	2	192	1	106	0	0	0	0	0	0	2	290	1	156	1	163	1	174	0	0
-m /home/cfa24/research/orthocluster_analysis/out/mapping_pfal_pviv_60.txt -g1 /home/cfa24/research/orthocluster_analysis/out/genome_pfal_60.txt -g2 /home/cfa24/research/orthocluster_analysis/out/genome_pviv_60.txt -d /home/cfa24/research/orthocluster_ana	60	45	27	439	428	7	460	5	424	177.481	176.074	0	0	0	0	2	44	0	0	1	43	1	59	2	129	0	0	3	263	2	192	1	106	0	0	0	0	0	0	2	290	1	156	1	163	1	174	0	0
-m /home/cfa24/research/orthocluster_analysis/out/mapping_pfal_pviv_60.txt -g1 /home/cfa24/research/orthocluster_analysis/out/genome_pfal_60.txt -g2 /home/cfa24/research/orthocluster_analysis/out/genome_pviv_60.txt -d /home/cfa24/research/orthocluster_ana	60	50	27	439	428	7	460	5	424	177.481	176.074	0	0	0	0	2	44	0	0	1	43	1	59	2	129	0	0	3	263	2	192	1	106	0	0	0	0	0	0	2	290	1	156	1	163	1	174	0	0
-m /home/cfa24/research/orthocluster_analysis/out/mapping_pfal_pviv_60.txt -g1 /home/cfa24/research/orthocluster_analysis/out/genome_pfal_60.txt -g2 /home/cfa24/research/orthocluster_analysis/out/genome_pviv_60.txt -d /home/cfa24/research/orthocluster_ana	60	55	27	439	428	7	460	5	424	177.481	176.074	0	0	0	0	2	44	0	0	1	43	1	59	2	129	0	0	3	263	2	192	1	106	0	0	0	0	0	0	2	290	1	156	1	163	1	174	0	0
-m /home/cfa24/research/orthocluster_analysis/out/mapping_pfal_pviv_60.txt -g1 /home/cfa24/research/orthocluster_analysis/out/genome_pfal_60.txt -g2 /home/cfa24/research/orthocluster_analysis/out/genome_pviv_60.txt -d /home/cfa24/research/orthocluster_ana	60	60	27	439	428	7	460	5	424	177.481	176.074	0	0	0	0	2	44	0	0	1	43	1	59	2	129	0	0	3	263	2	192	1	106	0	0	0	0	0	0	2	290	1	156	1	163	1	174	0	0
-m /home/cfa24/research/orthocluster_analysis/out/mapping_pfal_pviv_60.txt -g1 /home/cfa24/research/orthocluster_analysis/out/genome_pfal_60.txt -g2 /home/cfa24/research/orthocluster_analysis/out/genome_pviv_60.txt -d /home/cfa24/research/orthocluster_ana	60	65	27	439	428	7	460	5	424	177.481	176.074	0	0	0	0	2	44	0	0	1	43	1	59	2	129	0	0	3	263	2	192	1	106	0	0	0	0	0	0	2	290	1	156	1	163	1	174	0	0
-m /home/cfa24/research/orthocluster_analysis/out/mapping_pfal_pviv_60.txt -g1 /home/cfa24/research/orthocluster_analysis/out/genome_pfal_60.txt -g2 /home/cfa24/research/orthocluster_analysis/out/genome_pviv_60.txt -d /home/cfa24/research/orthocluster_ana	60	70	27	439	428	7	460	5	424	177.481	176.074	0	0	0	0	2	44	0	0	1	43	1	59	2	129	0	0	3	263	2	192	1	106	0	0	0	0	0	0	2	290	1	156	1	163	1	174	0	0
-m /home/cfa24/research/orthocluster_analysis/out/mapping_pfal_pviv_60.txt -g1 /home/cfa24/research/orthocluster_analysis/out/genome_pfal_60.txt -g2 /home/cfa24/research/orthocluster_analysis/out/genome_pviv_60.txt -d /home/cfa24/research/orthocluster_ana	60	75	27	439	428	7	460	5	424	177.481	176.074	0	0	0	0	2	44	0	0	1	43	1	59	2	129	0	0	3	263	2	192	1	106	0	0	0	0	0	0	2	290	1	156	1	163	1	174	0	0
-m /home/cfa24/research/orthocluster_analysis/out/mapping_pfal_pviv_60.txt -g1 /home/cfa24/research/orthocluster_analysis/out/genome_pfal_60.txt -g2 /home/cfa24/research/orthocluster_analysis/out/genome_pviv_60.txt -d /home/cfa24/research/orthocluster_ana	60	80	27	439	428	7	460	5	424	177.481	176.074	0	0	0	0	2	44	0	0	1	43	1	59	2	129	0	0	3	263	2	192	1	106	0	0	0	0	0	0	2	290	1	156	1	163	1	174	0	0
-m /home/cfa24/research/orthocluster_analysis/out/mapping_pfal_pviv_60.txt -g1 /home/cfa24/research/orthocluster_analysis/out/genome_pfal_60.txt -g2 /home/cfa24/research/orthocluster_analysis/out/genome_pviv_60.txt -d /home/cfa24/research/orthocluster_ana	65	0	406	50	50	1	0	1	0	10.5025	10.5025	254	1315	106	1606	30	732	12	422	4	189	0	0	0	0	0	0	0	0	0	0	0	0	0	0	0	0	0	0	0	0	0	0	0	0	0	0	0	0
-m /home/cfa24/research/orthocluster_analysis/out/mapping_pfal_pviv_60.txt -g1 /home/cfa24/research/orthocluster_analysis/out/genome_pfal_60.txt -g2 /home/cfa24/research/orthocluster_analysis/out/genome_pviv_60.txt -d /home/cfa24/research/orthocluster_ana	65	5	243	167	169	1	135	1	112	18.177	18.0823	151	719	26	391	28	679	8	263	8	368	1	59	5	313	3	227	3	249	2	183	5	520	1	113	0	0	0	0	0	0	0	0	2	333	0	0	0	0
-m /home/cfa24/research/orthocluster_analysis/out/mapping_pfal_pviv_60.txt -g1 /home/cfa24/research/orthocluster_analysis/out/genome_pfal_60.txt -g2 /home/cfa24/research/orthocluster_analysis/out/genome_pviv_60.txt -d /home/cfa24/research/orthocluster_ana	65	10	56	427	418	6	377	4	317	83.8571	82.75	19	97	7	94	5	127	2	67	4	177	1	53	2	129	0	0	0	0	0	0	1	106	0	0	1	126	0	0	3	430	0	0	1	163	0	0	0	0
-m /home/cfa24/research/orthocluster_analysis/out/mapping_pfal_pviv_60.txt -g1 /home/cfa24/research/orthocluster_analysis/out/genome_pfal_60.txt -g2 /home/cfa24/research/orthocluster_analysis/out/genome_pviv_60.txt -d /home/cfa24/research/orthocluster_ana	65	15	34	439	428	7	439	5	375	140.176	138.235	4	16	2	25	3	69	0	0	3	128	0	0	3	197	0	0	2	176	1	93	1	106	0	0	0	0	0	0	2	290	1	156	1	163	1	174	0	0
-m /home/cfa24/research/orthocluster_analysis/out/mapping_pfal_pviv_60.txt -g1 /home/cfa24/research/orthocluster_analysis/out/genome_pfal_60.txt -g2 /home/cfa24/research/orthocluster_analysis/out/genome_pviv_60.txt -d /home/cfa24/research/orthocluster_ana	65	20	26	439	428	147	475	67	387	184.846	178.385	1	2	0	0	2	46	0	0	0	0	1	57	3	196	0	0	2	177	0	0	1	106	0	0	0	0	0	0	2	290	1	156	1	163	1	174	0	0
-m /home/cfa24/research/orthocluster_analysis/out/mapping_pfal_pviv_60.txt -g1 /home/cfa24/research/orthocluster_analysis/out/genome_pfal_60.txt -g2 /home/cfa24/research/orthocluster_analysis/out/genome_pviv_60.txt -d /home/cfa24/research/orthocluster_ana	65	25	25	439	428	147	478	67	391	192.44	185.76	0	0	0	0	2	46	0	0	0	0	1	59	2	129	1	72	2	177	0	0	1	106	0	0	0	0	0	0	2	290	1	156	1	163	1	174	0	0
-m /home/cfa24/research/orthocluster_analysis/out/mapping_pfal_pviv_60.txt -g1 /home/cfa24/research/orthocluster_analysis/out/genome_pfal_60.txt -g2 /home/cfa24/research/orthocluster_analysis/out/genome_pviv_60.txt -d /home/cfa24/research/orthocluster_ana	65	30	25	439	428	147	478	67	391	192.44	185.76	0	0	0	0	2	46	0	0	0	0	1	59	2	129	1	72	2	177	0	0	1	106	0	0	0	0	0	0	2	290	1	156	1	163	1	174	0	0
-m /home/cfa24/research/orthocluster_analysis/out/mapping_pfal_pviv_60.txt -g1 /home/cfa24/research/orthocluster_analysis/out/genome_pfal_60.txt -g2 /home/cfa24/research/orthocluster_analysis/out/genome_pviv_60.txt -d /home/cfa24/research/orthocluster_ana	65	35	25	439	428	147	478	67	420	192.44	186.92	1	3	0	0	1	21	0	0	0	0	1	59	2	129	0	0	2	177	1	94	1	106	0	0	0	0	0	0	2	290	1	156	1	163	1	174	0	0
-m /home/cfa24/research/orthocluster_analysis/out/mapping_pfal_pviv_60.txt -g1 /home/cfa24/research/orthocluster_analysis/out/genome_pfal_60.txt -g2 /home/cfa24/research/orthocluster_analysis/out/genome_pviv_60.txt -d /home/cfa24/research/orthocluster_ana	65	40	24	439	428	147	480	67	422	200.542	194.792	0	0	0	0	1	21	0	0	0	0	1	59	2	129	0	0	2	177	1	99	1	106	0	0	0	0	0	0	2	290	1	156	1	163	1	174	0	0
-m /home/cfa24/research/orthocluster_analysis/out/mapping_pfal_pviv_60.txt -g1 /home/cfa24/research/orthocluster_analysis/out/genome_pfal_60.txt -g2 /home/cfa24/research/orthocluster_analysis/out/genome_pviv_60.txt -d /home/cfa24/research/orthocluster_ana	65	45	24	439	428	147	480	67	422	200.542	194.792	0	0	0	0	1	21	0	0	0	0	1	59	2	129	0	0	2	177	1	99	1	106	0	0	0	0	0	0	2	290	1	156	1	163	1	174	0	0
-m /home/cfa24/research/orthocluster_analysis/out/mapping_pfal_pviv_60.txt -g1 /home/cfa24/research/orthocluster_analysis/out/genome_pfal_60.txt -g2 /home/cfa24/research/orthocluster_analysis/out/genome_pviv_60.txt -d /home/cfa24/research/orthocluster_ana	65	50	24	439	428	147	480	67	422	200.542	194.792	0	0	0	0	1	21	0	0	0	0	1	59	2	129	0	0	2	177	1	99	1	106	0	0	0	0	0	0	2	290	1	156	1	163	1	174	0	0
-m /home/cfa24/research/orthocluster_analysis/out/mapping_pfal_pviv_60.txt -g1 /home/cfa24/research/orthocluster_analysis/out/genome_pfal_60.txt -g2 /home/cfa24/research/orthocluster_analysis/out/genome_pviv_60.txt -d /home/cfa24/research/orthocluster_ana	65	55	24	439	428	147	480	67	422	200.542	194.792	0	0	0	0	1	21	0	0	0	0	1	59	2	129	0	0	2	177	1	99	1	106	0	0	0	0	0	0	2	290	1	156	1	163	1	174	0	0
-m /home/cfa24/research/orthocluster_analysis/out/mapping_pfal_pviv_60.txt -g1 /home/cfa24/research/orthocluster_analysis/out/genome_pfal_60.txt -g2 /home/cfa24/research/orthocluster_analysis/out/genome_pviv_60.txt -d /home/cfa24/research/orthocluster_ana	65	60	24	439	428	147	480	67	422	200.542	194.792	0	0	0	0	1	21	0	0	0	0	1	59	2	129	0	0	2	177	1	99	1	106	0	0	0	0	0	0	2	290	1	156	1	163	1	174	0	0
-m /home/cfa24/research/orthocluster_analysis/out/mapping_pfal_pviv_60.txt -g1 /home/cfa24/research/orthocluster_analysis/out/genome_pfal_60.txt -g2 /home/cfa24/research/orthocluster_analysis/out/genome_pviv_60.txt -d /home/cfa24/research/orthocluster_ana	65	65	24	439	428	147	480	67	422	200.542	194.792	0	0	0	0	1	21	0	0	0	0	1	59	2	129	0	0	2	177	1	99	1	106	0	0	0	0	0	0	2	290	1	156	1	163	1	174	0	0
-m /home/cfa24/research/orthocluster_analysis/out/mapping_pfal_pviv_60.txt -g1 /home/cfa24/research/orthocluster_analysis/out/genome_pfal_60.txt -g2 /home/cfa24/research/orthocluster_analysis/out/genome_pviv_60.txt -d /home/cfa24/research/orthocluster_ana	65	70	24	439	428	147	480	67	422	200.542	194.792	0	0	0	0	1	21	0	0	0	0	1	59	2	129	0	0	2	177	1	99	1	106	0	0	0	0	0	0	2	290	1	156	1	163	1	174	0	0
-m /home/cfa24/research/orthocluster_analysis/out/mapping_pfal_pviv_60.txt -g1 /home/cfa24/research/orthocluster_analysis/out/genome_pfal_60.txt -g2 /home/cfa24/research/orthocluster_analysis/out/genome_pviv_60.txt -d /home/cfa24/research/orthocluster_ana	65	75	24	439	428	147	480	67	422	200.542	194.792	0	0	0	0	1	21	0	0	0	0	1	59	2	129	0	0	2	177	1	99	1	106	0	0	0	0	0	0	2	290	1	156	1	163	1	174	0	0
-m /home/cfa24/research/orthocluster_analysis/out/mapping_pfal_pviv_60.txt -g1 /home/cfa24/research/orthocluster_analysis/out/genome_pfal_60.txt -g2 /home/cfa24/research/orthocluster_analysis/out/genome_pviv_60.txt -d /home/cfa24/research/orthocluster_ana	65	80	24	439	428	147	480	67	422	200.542	194.792	0	0	0	0	1	21	0	0	0	0	1	59	2	129	0	0	2	177	1	99	1	106	0	0	0	0	0	0	2	290	1	156	1	163	1	174	0	0
-m /home/cfa24/research/orthocluster_analysis/out/mapping_pfal_pviv_60.txt -g1 /home/cfa24/research/orthocluster_analysis/out/genome_pfal_60.txt -g2 /home/cfa24/research/orthocluster_analysis/out/genome_pviv_60.txt -d /home/cfa24/research/orthocluster_ana	70	0	406	50	50	1	0	1	0	10.5025	10.5025	254	1315	106	1606	30	732	12	422	4	189	0	0	0	0	0	0	0	0	0	0	0	0	0	0	0	0	0	0	0	0	0	0	0	0	0	0	0	0
-m /home/cfa24/research/orthocluster_analysis/out/mapping_pfal_pviv_60.txt -g1 /home/cfa24/research/orthocluster_analysis/out/genome_pfal_60.txt -g2 /home/cfa24/research/orthocluster_analysis/out/genome_pviv_60.txt -d /home/cfa24/research/orthocluster_ana	70	5	243	167	169	1	135	1	112	18.177	18.0823	151	719	26	391	28	679	8	263	8	368	1	59	5	313	3	227	3	249	2	183	5	520	1	113	0	0	0	0	0	0	0	0	2	333	0	0	0	0
-m /home/cfa24/research/orthocluster_analysis/out/mapping_pfal_pviv_60.txt -g1 /home/cfa24/research/orthocluster_analysis/out/genome_pfal_60.txt -g2 /home/cfa24/research/orthocluster_analysis/out/genome_pviv_60.txt -d /home/cfa24/research/orthocluster_ana	70	10	56	427	418	6	377	4	317	83.8571	82.75	19	97	7	94	5	127	2	67	4	177	1	53	2	129	0	0	0	0	0	0	1	106	0	0	1	126	0	0	3	430	0	0	1	163	0	0	0	0
-m /home/cfa24/research/orthocluster_analysis/out/mapping_pfal_pviv_60.txt -g1 /home/cfa24/research/orthocluster_analysis/out/genome_pfal_60.txt -g2 /home/cfa24/research/orthocluster_analysis/out/genome_pviv_60.txt -d /home/cfa24/research/orthocluster_ana	70	15	34	439	428	7	439	5	375	140.176	138.235	4	16	2	25	3	69	0	0	3	128	0	0	3	197	0	0	2	176	1	93	1	106	0	0	0	0	0	0	2	290	1	156	1	163	1	174	0	0
-m /home/cfa24/research/orthocluster_analysis/out/mapping_pfal_pviv_60.txt -g1 /home/cfa24/research/orthocluster_analysis/out/genome_pfal_60.txt -g2 /home/cfa24/research/orthocluster_analysis/out/genome_pviv_60.txt -d /home/cfa24/research/orthocluster_ana	70	20	26	439	428	147	475	67	387	184.846	178.385	1	2	0	0	2	46	0	0	0	0	1	57	3	196	0	0	2	177	0	0	1	106	0	0	0	0	0	0	2	290	1	156	1	163	1	174	0	0
-m /home/cfa24/research/orthocluster_analysis/out/mapping_pfal_pviv_60.txt -g1 /home/cfa24/research/orthocluster_analysis/out/genome_pfal_60.txt -g2 /home/cfa24/research/orthocluster_analysis/out/genome_pviv_60.txt -d /home/cfa24/research/orthocluster_ana	70	25	25	439	428	147	478	67	391	192.44	185.76	0	0	0	0	2	46	0	0	0	0	1	59	2	129	1	72	2	177	0	0	1	106	0	0	0	0	0	0	2	290	1	156	1	163	1	174	0	0
-m /home/cfa24/research/orthocluster_analysis/out/mapping_pfal_pviv_60.txt -g1 /home/cfa24/research/orthocluster_analysis/out/genome_pfal_60.txt -g2 /home/cfa24/research/orthocluster_analysis/out/genome_pviv_60.txt -d /home/cfa24/research/orthocluster_ana	70	30	25	439	428	147	478	67	391	192.44	185.76	0	0	0	0	2	46	0	0	0	0	1	59	2	129	1	72	2	177	0	0	1	106	0	0	0	0	0	0	2	290	1	156	1	163	1	174	0	0
-m /home/cfa24/research/orthocluster_analysis/out/mapping_pfal_pviv_60.txt -g1 /home/cfa24/research/orthocluster_analysis/out/genome_pfal_60.txt -g2 /home/cfa24/research/orthocluster_analysis/out/genome_pviv_60.txt -d /home/cfa24/research/orthocluster_ana	70	35	25	439	428	147	478	67	420	192.44	186.92	1	3	0	0	1	21	0	0	0	0	1	59	2	129	0	0	2	177	1	94	1	106	0	0	0	0	0	0	2	290	1	156	1	163	1	174	0	0
-m /home/cfa24/research/orthocluster_analysis/out/mapping_pfal_pviv_60.txt -g1 /home/cfa24/research/orthocluster_analysis/out/genome_pfal_60.txt -g2 /home/cfa24/research/orthocluster_analysis/out/genome_pviv_60.txt -d /home/cfa24/research/orthocluster_ana	70	40	24	439	428	147	480	67	422	200.542	194.792	0	0	0	0	1	21	0	0	0	0	1	59	2	129	0	0	2	177	1	99	1	106	0	0	0	0	0	0	2	290	1	156	1	163	1	174	0	0
-m /home/cfa24/research/orthocluster_analysis/out/mapping_pfal_pviv_60.txt -g1 /home/cfa24/research/orthocluster_analysis/out/genome_pfal_60.txt -g2 /home/cfa24/research/orthocluster_analysis/out/genome_pviv_60.txt -d /home/cfa24/research/orthocluster_ana	70	45	24	439	428	147	480	67	422	200.542	194.792	0	0	0	0	1	21	0	0	0	0	1	59	2	129	0	0	2	177	1	99	1	106	0	0	0	0	0	0	2	290	1	156	1	163	1	174	0	0
-m /home/cfa24/research/orthocluster_analysis/out/mapping_pfal_pviv_60.txt -g1 /home/cfa24/research/orthocluster_analysis/out/genome_pfal_60.txt -g2 /home/cfa24/research/orthocluster_analysis/out/genome_pviv_60.txt -d /home/cfa24/research/orthocluster_ana	70	50	24	439	428	147	480	67	422	200.542	194.792	0	0	0	0	1	21	0	0	0	0	1	59	2	129	0	0	2	177	1	99	1	106	0	0	0	0	0	0	2	290	1	156	1	163	1	174	0	0
-m /home/cfa24/research/orthocluster_analysis/out/mapping_pfal_pviv_60.txt -g1 /home/cfa24/research/orthocluster_analysis/out/genome_pfal_60.txt -g2 /home/cfa24/research/orthocluster_analysis/out/genome_pviv_60.txt -d /home/cfa24/research/orthocluster_ana	70	55	24	439	428	147	480	67	422	200.542	194.792	0	0	0	0	1	21	0	0	0	0	1	59	2	129	0	0	2	177	1	99	1	106	0	0	0	0	0	0	2	290	1	156	1	163	1	174	0	0
-m /home/cfa24/research/orthocluster_analysis/out/mapping_pfal_pviv_60.txt -g1 /home/cfa24/research/orthocluster_analysis/out/genome_pfal_60.txt -g2 /home/cfa24/research/orthocluster_analysis/out/genome_pviv_60.txt -d /home/cfa24/research/orthocluster_ana	70	60	24	439	428	147	480	67	422	200.542	194.792	0	0	0	0	1	21	0	0	0	0	1	59	2	129	0	0	2	177	1	99	1	106	0	0	0	0	0	0	2	290	1	156	1	163	1	174	0	0
-m /home/cfa24/research/orthocluster_analysis/out/mapping_pfal_pviv_60.txt -g1 /home/cfa24/research/orthocluster_analysis/out/genome_pfal_60.txt -g2 /home/cfa24/research/orthocluster_analysis/out/genome_pviv_60.txt -d /home/cfa24/research/orthocluster_ana	70	65	24	439	428	147	480	67	422	200.542	194.792	0	0	0	0	1	21	0	0	0	0	1	59	2	129	0	0	2	177	1	99	1	106	0	0	0	0	0	0	2	290	1	156	1	163	1	174	0	0
-m /home/cfa24/research/orthocluster_analysis/out/mapping_pfal_pviv_60.txt -g1 /home/cfa24/research/orthocluster_analysis/out/genome_pfal_60.txt -g2 /home/cfa24/research/orthocluster_analysis/out/genome_pviv_60.txt -d /home/cfa24/research/orthocluster_ana	70	70	24	439	428	147	480	67	422	200.542	194.792	0	0	0	0	1	21	0	0	0	0	1	59	2	129	0	0	2	177	1	99	1	106	0	0	0	0	0	0	2	290	1	156	1	163	1	174	0	0
-m /home/cfa24/research/orthocluster_analysis/out/mapping_pfal_pviv_60.txt -g1 /home/cfa24/research/orthocluster_analysis/out/genome_pfal_60.txt -g2 /home/cfa24/research/orthocluster_analysis/out/genome_pviv_60.txt -d /home/cfa24/research/orthocluster_ana	70	75	24	439	428	147	480	67	422	200.542	194.792	0	0	0	0	1	21	0	0	0	0	1	59	2	129	0	0	2	177	1	99	1	106	0	0	0	0	0	0	2	290	1	156	1	163	1	174	0	0
-m /home/cfa24/research/orthocluster_analysis/out/mapping_pfal_pviv_60.txt -g1 /home/cfa24/research/orthocluster_analysis/out/genome_pfal_60.txt -g2 /home/cfa24/research/orthocluster_analysis/out/genome_pviv_60.txt -d /home/cfa24/research/orthocluster_ana	70	80	24	439	428	147	480	67	422	200.542	194.792	0	0	0	0	1	21	0	0	0	0	1	59	2	129	0	0	2	177	1	99	1	106	0	0	0	0	0	0	2	290	1	156	1	163	1	174	0	0
-m /home/cfa24/research/orthocluster_analysis/out/mapping_pfal_pviv_60.txt -g1 /home/cfa24/research/orthocluster_analysis/out/genome_pfal_60.txt -g2 /home/cfa24/research/orthocluster_analysis/out/genome_pviv_60.txt -d /home/cfa24/research/orthocluster_ana	75	0	406	50	50	1	0	1	0	10.5025	10.5025	254	1315	106	1606	30	732	12	422	4	189	0	0	0	0	0	0	0	0	0	0	0	0	0	0	0	0	0	0	0	0	0	0	0	0	0	0	0	0
-m /home/cfa24/research/orthocluster_analysis/out/mapping_pfal_pviv_60.txt -g1 /home/cfa24/research/orthocluster_analysis/out/genome_pfal_60.txt -g2 /home/cfa24/research/orthocluster_analysis/out/genome_pviv_60.txt -d /home/cfa24/research/orthocluster_ana	75	5	243	167	169	1	135	1	112	18.177	18.0823	151	719	26	391	28	679	8	263	8	368	1	59	5	313	3	227	3	249	2	183	5	520	1	113	0	0	0	0	0	0	0	0	2	333	0	0	0	0
-m /home/cfa24/research/orthocluster_analysis/out/mapping_pfal_pviv_60.txt -g1 /home/cfa24/research/orthocluster_analysis/out/genome_pfal_60.txt -g2 /home/cfa24/research/orthocluster_analysis/out/genome_pviv_60.txt -d /home/cfa24/research/orthocluster_ana	75	10	56	427	418	6	377	4	317	83.8571	82.75	19	97	7	94	5	127	2	67	4	177	1	53	2	129	0	0	0	0	0	0	1	106	0	0	1	126	0	0	3	430	0	0	1	163	0	0	0	0
-m /home/cfa24/research/orthocluster_analysis/out/mapping_pfal_pviv_60.txt -g1 /home/cfa24/research/orthocluster_analysis/out/genome_pfal_60.txt -g2 /home/cfa24/research/orthocluster_analysis/out/genome_pviv_60.txt -d /home/cfa24/research/orthocluster_ana	75	15	34	439	428	7	439	5	375	140.176	138.235	4	16	2	25	3	69	0	0	3	128	0	0	3	197	0	0	2	176	1	93	1	106	0	0	0	0	0	0	2	290	1	156	1	163	1	174	0	0
-m /home/cfa24/research/orthocluster_analysis/out/mapping_pfal_pviv_60.txt -g1 /home/cfa24/research/orthocluster_analysis/out/genome_pfal_60.txt -g2 /home/cfa24/research/orthocluster_analysis/out/genome_pviv_60.txt -d /home/cfa24/research/orthocluster_ana	75	20	26	439	428	147	475	67	387	184.846	178.385	1	2	0	0	2	46	0	0	0	0	1	57	3	196	0	0	2	177	0	0	1	106	0	0	0	0	0	0	2	290	1	156	1	163	1	174	0	0
-m /home/cfa24/research/orthocluster_analysis/out/mapping_pfal_pviv_60.txt -g1 /home/cfa24/research/orthocluster_analysis/out/genome_pfal_60.txt -g2 /home/cfa24/research/orthocluster_analysis/out/genome_pviv_60.txt -d /home/cfa24/research/orthocluster_ana	75	25	25	439	428	147	478	67	391	192.44	185.76	0	0	0	0	2	46	0	0	0	0	1	59	2	129	1	72	2	177	0	0	1	106	0	0	0	0	0	0	2	290	1	156	1	163	1	174	0	0
-m /home/cfa24/research/orthocluster_analysis/out/mapping_pfal_pviv_60.txt -g1 /home/cfa24/research/orthocluster_analysis/out/genome_pfal_60.txt -g2 /home/cfa24/research/orthocluster_analysis/out/genome_pviv_60.txt -d /home/cfa24/research/orthocluster_ana	75	30	25	439	428	147	478	67	391	192.44	185.76	0	0	0	0	2	46	0	0	0	0	1	59	2	129	1	72	2	177	0	0	1	106	0	0	0	0	0	0	2	290	1	156	1	163	1	174	0	0
-m /home/cfa24/research/orthocluster_analysis/out/mapping_pfal_pviv_60.txt -g1 /home/cfa24/research/orthocluster_analysis/out/genome_pfal_60.txt -g2 /home/cfa24/research/orthocluster_analysis/out/genome_pviv_60.txt -d /home/cfa24/research/orthocluster_ana	75	35	25	439	428	147	478	67	420	192.44	186.92	1	3	0	0	1	21	0	0	0	0	1	59	2	129	0	0	2	177	1	94	1	106	0	0	0	0	0	0	2	290	1	156	1	163	1	174	0	0
-m /home/cfa24/research/orthocluster_analysis/out/mapping_pfal_pviv_60.txt -g1 /home/cfa24/research/orthocluster_analysis/out/genome_pfal_60.txt -g2 /home/cfa24/research/orthocluster_analysis/out/genome_pviv_60.txt -d /home/cfa24/research/orthocluster_ana	75	40	24	439	428	147	480	67	422	200.542	194.792	0	0	0	0	1	21	0	0	0	0	1	59	2	129	0	0	2	177	1	99	1	106	0	0	0	0	0	0	2	290	1	156	1	163	1	174	0	0
-m /home/cfa24/research/orthocluster_analysis/out/mapping_pfal_pviv_60.txt -g1 /home/cfa24/research/orthocluster_analysis/out/genome_pfal_60.txt -g2 /home/cfa24/research/orthocluster_analysis/out/genome_pviv_60.txt -d /home/cfa24/research/orthocluster_ana	75	45	24	439	428	147	480	67	422	200.542	194.792	0	0	0	0	1	21	0	0	0	0	1	59	2	129	0	0	2	177	1	99	1	106	0	0	0	0	0	0	2	290	1	156	1	163	1	174	0	0
-m /home/cfa24/research/orthocluster_analysis/out/mapping_pfal_pviv_60.txt -g1 /home/cfa24/research/orthocluster_analysis/out/genome_pfal_60.txt -g2 /home/cfa24/research/orthocluster_analysis/out/genome_pviv_60.txt -d /home/cfa24/research/orthocluster_ana	75	50	24	439	428	147	480	67	422	200.542	194.792	0	0	0	0	1	21	0	0	0	0	1	59	2	129	0	0	2	177	1	99	1	106	0	0	0	0	0	0	2	290	1	156	1	163	1	174	0	0
-m /home/cfa24/research/orthocluster_analysis/out/mapping_pfal_pviv_60.txt -g1 /home/cfa24/research/orthocluster_analysis/out/genome_pfal_60.txt -g2 /home/cfa24/research/orthocluster_analysis/out/genome_pviv_60.txt -d /home/cfa24/research/orthocluster_ana	75	55	24	439	428	147	480	67	422	200.542	194.792	0	0	0	0	1	21	0	0	0	0	1	59	2	129	0	0	2	177	1	99	1	106	0	0	0	0	0	0	2	290	1	156	1	163	1	174	0	0
-m /home/cfa24/research/orthocluster_analysis/out/mapping_pfal_pviv_60.txt -g1 /home/cfa24/research/orthocluster_analysis/out/genome_pfal_60.txt -g2 /home/cfa24/research/orthocluster_analysis/out/genome_pviv_60.txt -d /home/cfa24/research/orthocluster_ana	75	60	24	439	428	147	480	67	422	200.542	194.792	0	0	0	0	1	21	0	0	0	0	1	59	2	129	0	0	2	177	1	99	1	106	0	0	0	0	0	0	2	290	1	156	1	163	1	174	0	0
-m /home/cfa24/research/orthocluster_analysis/out/mapping_pfal_pviv_60.txt -g1 /home/cfa24/research/orthocluster_analysis/out/genome_pfal_60.txt -g2 /home/cfa24/research/orthocluster_analysis/out/genome_pviv_60.txt -d /home/cfa24/research/orthocluster_ana	75	65	24	439	428	147	480	67	422	200.542	194.792	0	0	0	0	1	21	0	0	0	0	1	59	2	129	0	0	2	177	1	99	1	106	0	0	0	0	0	0	2	290	1	156	1	163	1	174	0	0
-m /home/cfa24/research/orthocluster_analysis/out/mapping_pfal_pviv_60.txt -g1 /home/cfa24/research/orthocluster_analysis/out/genome_pfal_60.txt -g2 /home/cfa24/research/orthocluster_analysis/out/genome_pviv_60.txt -d /home/cfa24/research/orthocluster_ana	75	70	24	439	428	147	480	67	422	200.542	194.792	0	0	0	0	1	21	0	0	0	0	1	59	2	129	0	0	2	177	1	99	1	106	0	0	0	0	0	0	2	290	1	156	1	163	1	174	0	0
-m /home/cfa24/research/orthocluster_analysis/out/mapping_pfal_pviv_60.txt -g1 /home/cfa24/research/orthocluster_analysis/out/genome_pfal_60.txt -g2 /home/cfa24/research/orthocluster_analysis/out/genome_pviv_60.txt -d /home/cfa24/research/orthocluster_ana	75	75	24	439	428	147	480	67	422	200.542	194.792	0	0	0	0	1	21	0	0	0	0	1	59	2	129	0	0	2	177	1	99	1	106	0	0	0	0	0	0	2	290	1	156	1	163	1	174	0	0
-m /home/cfa24/research/orthocluster_analysis/out/mapping_pfal_pviv_60.txt -g1 /home/cfa24/research/orthocluster_analysis/out/genome_pfal_60.txt -g2 /home/cfa24/research/orthocluster_analysis/out/genome_pviv_60.txt -d /home/cfa24/research/orthocluster_ana	75	80	24	439	428	147	480	67	422	200.542	194.792	0	0	0	0	1	21	0	0	0	0	1	59	2	129	0	0	2	177	1	99	1	106	0	0	0	0	0	0	2	290	1	156	1	163	1	174	0	0
-m /home/cfa24/research/orthocluster_analysis/out/mapping_pfal_pviv_60.txt -g1 /home/cfa24/research/orthocluster_analysis/out/genome_pfal_60.txt -g2 /home/cfa24/research/orthocluster_analysis/out/genome_pviv_60.txt -d /home/cfa24/research/orthocluster_ana	80	0	406	50	50	1	0	1	0	10.5025	10.5025	254	1315	106	1606	30	732	12	422	4	189	0	0	0	0	0	0	0	0	0	0	0	0	0	0	0	0	0	0	0	0	0	0	0	0	0	0	0	0
-m /home/cfa24/research/orthocluster_analysis/out/mapping_pfal_pviv_60.txt -g1 /home/cfa24/research/orthocluster_analysis/out/genome_pfal_60.txt -g2 /home/cfa24/research/orthocluster_analysis/out/genome_pviv_60.txt -d /home/cfa24/research/orthocluster_ana	80	5	243	167	169	1	135	1	112	18.177	18.0823	151	719	26	391	28	679	8	263	8	368	1	59	5	313	3	227	3	249	2	183	5	520	1	113	0	0	0	0	0	0	0	0	2	333	0	0	0	0
-m /home/cfa24/research/orthocluster_analysis/out/mapping_pfal_pviv_60.txt -g1 /home/cfa24/research/orthocluster_analysis/out/genome_pfal_60.txt -g2 /home/cfa24/research/orthocluster_analysis/out/genome_pviv_60.txt -d /home/cfa24/research/orthocluster_ana	80	10	56	427	418	6	377	4	317	83.8571	82.75	19	97	7	94	5	127	2	67	4	177	1	53	2	129	0	0	0	0	0	0	1	106	0	0	1	126	0	0	3	430	0	0	1	163	0	0	0	0
-m /home/cfa24/research/orthocluster_analysis/out/mapping_pfal_pviv_60.txt -g1 /home/cfa24/research/orthocluster_analysis/out/genome_pfal_60.txt -g2 /home/cfa24/research/orthocluster_analysis/out/genome_pviv_60.txt -d /home/cfa24/research/orthocluster_ana	80	15	34	439	428	7	439	5	375	140.176	138.235	4	16	2	25	3	69	0	0	3	128	0	0	3	197	0	0	2	176	1	93	1	106	0	0	0	0	0	0	2	290	1	156	1	163	1	174	0	0
-m /home/cfa24/research/orthocluster_analysis/out/mapping_pfal_pviv_60.txt -g1 /home/cfa24/research/orthocluster_analysis/out/genome_pfal_60.txt -g2 /home/cfa24/research/orthocluster_analysis/out/genome_pviv_60.txt -d /home/cfa24/research/orthocluster_ana	80	20	26	439	428	147	475	67	387	184.846	178.385	1	2	0	0	2	46	0	0	0	0	1	57	3	196	0	0	2	177	0	0	1	106	0	0	0	0	0	0	2	290	1	156	1	163	1	174	0	0
-m /home/cfa24/research/orthocluster_analysis/out/mapping_pfal_pviv_60.txt -g1 /home/cfa24/research/orthocluster_analysis/out/genome_pfal_60.txt -g2 /home/cfa24/research/orthocluster_analysis/out/genome_pviv_60.txt -d /home/cfa24/research/orthocluster_ana	80	25	25	439	428	147	478	67	391	192.44	185.76	0	0	0	0	2	46	0	0	0	0	1	59	2	129	1	72	2	177	0	0	1	106	0	0	0	0	0	0	2	290	1	156	1	163	1	174	0	0
-m /home/cfa24/research/orthocluster_analysis/out/mapping_pfal_pviv_60.txt -g1 /home/cfa24/research/orthocluster_analysis/out/genome_pfal_60.txt -g2 /home/cfa24/research/orthocluster_analysis/out/genome_pviv_60.txt -d /home/cfa24/research/orthocluster_ana	80	30	25	439	428	147	478	67	391	192.44	185.76	0	0	0	0	2	46	0	0	0	0	1	59	2	129	1	72	2	177	0	0	1	106	0	0	0	0	0	0	2	290	1	156	1	163	1	174	0	0
-m /home/cfa24/research/orthocluster_analysis/out/mapping_pfal_pviv_60.txt -g1 /home/cfa24/research/orthocluster_analysis/out/genome_pfal_60.txt -g2 /home/cfa24/research/orthocluster_analysis/out/genome_pviv_60.txt -d /home/cfa24/research/orthocluster_ana	80	35	25	439	428	147	478	67	420	192.44	186.92	1	3	0	0	1	21	0	0	0	0	1	59	2	129	0	0	2	177	1	94	1	106	0	0	0	0	0	0	2	290	1	156	1	163	1	174	0	0
-m /home/cfa24/research/orthocluster_analysis/out/mapping_pfal_pviv_60.txt -g1 /home/cfa24/research/orthocluster_analysis/out/genome_pfal_60.txt -g2 /home/cfa24/research/orthocluster_analysis/out/genome_pviv_60.txt -d /home/cfa24/research/orthocluster_ana	80	40	24	439	428	147	480	67	422	200.542	194.792	0	0	0	0	1	21	0	0	0	0	1	59	2	129	0	0	2	177	1	99	1	106	0	0	0	0	0	0	2	290	1	156	1	163	1	174	0	0
-m /home/cfa24/research/orthocluster_analysis/out/mapping_pfal_pviv_60.txt -g1 /home/cfa24/research/orthocluster_analysis/out/genome_pfal_60.txt -g2 /home/cfa24/research/orthocluster_analysis/out/genome_pviv_60.txt -d /home/cfa24/research/orthocluster_ana	80	45	24	439	428	147	480	67	422	200.542	194.792	0	0	0	0	1	21	0	0	0	0	1	59	2	129	0	0	2	177	1	99	1	106	0	0	0	0	0	0	2	290	1	156	1	163	1	174	0	0
-m /home/cfa24/research/orthocluster_analysis/out/mapping_pfal_pviv_60.txt -g1 /home/cfa24/research/orthocluster_analysis/out/genome_pfal_60.txt -g2 /home/cfa24/research/orthocluster_analysis/out/genome_pviv_60.txt -d /home/cfa24/research/orthocluster_ana	80	50	24	439	428	147	480	67	422	200.542	194.792	0	0	0	0	1	21	0	0	0	0	1	59	2	129	0	0	2	177	1	99	1	106	0	0	0	0	0	0	2	290	1	156	1	163	1	174	0	0
-m /home/cfa24/research/orthocluster_analysis/out/mapping_pfal_pviv_60.txt -g1 /home/cfa24/research/orthocluster_analysis/out/genome_pfal_60.txt -g2 /home/cfa24/research/orthocluster_analysis/out/genome_pviv_60.txt -d /home/cfa24/research/orthocluster_ana	80	55	24	439	428	147	480	67	422	200.542	194.792	0	0	0	0	1	21	0	0	0	0	1	59	2	129	0	0	2	177	1	99	1	106	0	0	0	0	0	0	2	290	1	156	1	163	1	174	0	0
-m /home/cfa24/research/orthocluster_analysis/out/mapping_pfal_pviv_60.txt -g1 /home/cfa24/research/orthocluster_analysis/out/genome_pfal_60.txt -g2 /home/cfa24/research/orthocluster_analysis/out/genome_pviv_60.txt -d /home/cfa24/research/orthocluster_ana	80	60	24	439	428	147	480	67	422	200.542	194.792	0	0	0	0	1	21	0	0	0	0	1	59	2	129	0	0	2	177	1	99	1	106	0	0	0	0	0	0	2	290	1	156	1	163	1	174	0	0
-m /home/cfa24/research/orthocluster_analysis/out/mapping_pfal_pviv_60.txt -g1 /home/cfa24/research/orthocluster_analysis/out/genome_pfal_60.txt -g2 /home/cfa24/research/orthocluster_analysis/out/genome_pviv_60.txt -d /home/cfa24/research/orthocluster_ana	80	65	24	439	428	147	480	67	422	200.542	194.792	0	0	0	0	1	21	0	0	0	0	1	59	2	129	0	0	2	177	1	99	1	106	0	0	0	0	0	0	2	290	1	156	1	163	1	174	0	0
-m /home/cfa24/research/orthocluster_analysis/out/mapping_pfal_pviv_60.txt -g1 /home/cfa24/research/orthocluster_analysis/out/genome_pfal_60.txt -g2 /home/cfa24/research/orthocluster_analysis/out/genome_pviv_60.txt -d /home/cfa24/research/orthocluster_ana	80	70	24	439	428	147	480	67	422	200.542	194.792	0	0	0	0	1	21	0	0	0	0	1	59	2	129	0	0	2	177	1	99	1	106	0	0	0	0	0	0	2	290	1	156	1	163	1	174	0	0
-m /home/cfa24/research/orthocluster_analysis/out/mapping_pfal_pviv_60.txt -g1 /home/cfa24/research/orthocluster_analysis/out/genome_pfal_60.txt -g2 /home/cfa24/research/orthocluster_analysis/out/genome_pviv_60.txt -d /home/cfa24/research/orthocluster_ana	80	75	24	439	428	147	480	67	422	200.542	194.792	0	0	0	0	1	21	0	0	0	0	1	59	2	129	0	0	2	177	1	99	1	106	0	0	0	0	0	0	2	290	1	156	1	163	1	174	0	0
-m /home/cfa24/research/orthocluster_analysis/out/mapping_pfal_pviv_60.txt -g1 /home/cfa24/research/orthocluster_analysis/out/genome_pfal_60.txt -g2 /home/cfa24/research/orthocluster_analysis/out/genome_pviv_60.txt -d /home/cfa24/research/orthocluster_ana	80	80	24	439	428	147	480	67	422	200.542	194.792	0	0	0	0	1	21	0	0	0	0	1	59	2	129	0	0	2	177	1	99	1	106	0	0	0	0	0	0	2	290	1	156	1	163	1	174	0	0
[truncated: 2 more columns]
