# Supplementary material for: Genome Comparison of Human and Non-Human Malaria Parasites Reveals Species Subset-Specific Genes Potentially Linked to Human Disease
Source: PubMed Central journal article supplement (PMC3245289; doi:10.1371/journal.pcbi.1002320), 2011-12-22
Supplement: pcbi.1002320.s019.pdf [file pcbi.1002320.s019.pdf]

**Table S10: Genes shared between *P. falciparum* and *P. vivax* but absent in *P. knowlesi*.**

| PfGene (PvPID/OG)     | Product                           | RNA-seq. expr. (IDC)                                                                | Protein expr.   | Additional information                                                                  |
|-----------------------|-----------------------------------|-------------------------------------------------------------------------------------|-----------------|-----------------------------------------------------------------------------------------|
| PF11405c (44/RODE)    | unknown function                  | 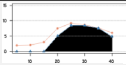   | TZ; iRBCm       | C-terminal TM (InterProScan); antigenic variation (PlasmoDraft)                         |
| MAL8P1.126 (35/ALVE)  | serine protease, putative         |    | oocyst SZ       | Deg2 chloroplast peptidase (MEROPS); sole member of clan PA/family S1; SP               |
| PF14_0454 (23/RODE)   | unknown function                  |    | SZ;TZ; (el)GC   | calponin-like actin-binding; winged-helix DNA binding; defense response (PlasmoDraft)   |
| PF11_0460 (19/RODE)   | unknown function                  |    | GC; MZ; eStages | upregulated in GC                                                                       |
| PFL0170w (19/RODE)    | transporter, putative             |    | (I)GC; TZ       | 12 TM; MFS general substrate transporter                                                |
| PF11_0361-a (55/RODE) | unknown function                  |    | -               | 6 TM; PQ-loop repeat; SP                                                                |
| PF11_0134 (52/RODE)   | unknown function                  |    | -               | TM; DUF1704 member (conserved in many species)                                          |
| MAL13P1.107 (34/----) | unknown function                  |    | SZ; (I)GC       | SP and GPI-anchor; similarity with neighboring rhoptry protein 2 (PF13_0116)            |
| PFL0360c (8/----)     | unknown function                  |    | -               | 3 TM; ZF; divergent Pv positional ortholog; similar to serine protease (PlasmoDB)       |
| PF14_0236 (12/----)   | unknown function                  |   | SZ; MZ          | ZF; divergent Pv positional ortholog; antigenic variation (PlasmoDraft); upregul. in GC |
| PF11216w (52/RODE)    | telomeric repeat binding factor 1 |  | -               | homeodomain-like; SANT, DNA binding; MYB-like; EST support                              |
| PFA0380w (10/RODE)    | serine/threonine kinase, putative |  | SZ              | N-terminal TM; divergent Pv positional ortholog; EST support; upregulated in SZ         |
| PF10_0185 (28/RODE)   | unknown function                  |  | -               | EST support; upregulated in GC                                                          |

Same genes as in Table 2 but including graphical RNA-seq expression profiles taken from PlasmoDB 7.1. RNA-seq expression values represent scaled expression values from the intraerythrocytic developmental cycle (IDC) as reported by Bartfai R *et al.* (2010). Diagram tick marks represent hours post infection along the x-axis (10, 20, 30, and 40 h post infection) and normalized coverage (log<sub>2</sub>) on the y-axis. For remaining legend please refer to legend of Table 2.
