# Supplementary material for: Genome Comparison of Human and Non-Human Malaria Parasites Reveals Species Subset-Specific Genes Potentially Linked to Human Disease
Source: PubMed Central journal article supplement (PMC3245289; doi:10.1371/journal.pcbi.1002320), 2011-12-22
Supplement: pcbi.1002320.s020.pdf [file pcbi.1002320.s020.pdf]

**Table S11: *P. falciparum* genes absent in *P. vivax* with possible role in human virulence.**

| PfGene (OG)        | Product                            | RNA-seq expr. (IDC) | Protein expr.     | Additional information                                                                        |
|--------------------|------------------------------------|---------------------|-------------------|-----------------------------------------------------------------------------------------------|
| PF07_0107 (----)   | exported protein, unknown function |                     | -                 | 2 TM domains; evasion of host defense (PlasmoDraft, 80%); PX                                  |
| PF13_0194 (----)   | probable protein, unknown function |                     | TZ                | chr13 MSP7-like gene cluster; SP; 1 TM domain; similar to MSP7-like                           |
| PF10_0350 (----)   | probable protein, unknown function |                     | -                 | chr10 MSP gene cluster; SP and GPI anchor; biological adhesion (PlasmoDraft, 66%)             |
| PF13_0071 (----)   | probable protein, unknown function |                     | TZ;SC;RU;SZ       | cell adhesion, phosphate transport (PlasmoDB)                                                 |
| PF13_0192 (----)   | conserved, unknown function        |                     | TZ;SC;RU; iRBCm   | chr13 MSP7-like gene cluster; 2 TM domains; NTP activity (PlasmoDraft)                        |
| MAL13P1.106 (----) | probable protein, unknown function |                     | (el)GC            | SP; 1 TM domain; upregulated in GC                                                            |
| PF14_0708 (PLASM)¥ | probable protein, unknown function |                     | eGC;MZ            | 2 TM domains; upregulated in GC; predicted paralog in <i>P. falciparum</i> (MAL8P1.95)        |
| PF14_0297 (ALVE)   | apyrase, putative                  |                     | -                 | predicted signal anchor and 2 TM domains; converts ATP to AMP; purine metabolism              |
| PFE1455w (PROT)    | sugar transporter, putative        |                     | -                 | 12 TM domains; glycoside-pentoside-hexuronide:cation symporter (GPH) family                   |
| PFA0360c (----)    | conserved, unknown function        |                     | -                 | SP; 1 TM domain; antigenic variation (OPI); upregulated in GC & SZ                            |
| PFF0335c (----)    | probable protein, unknown function |                     | eGC;TZ;MZ; eSC;RU | membrane protein from schizonts; possible rhoptry/surface protein; SP                         |
| PF10_0357 (----)   | probable protein, unknown function |                     | -                 | chr10 MSP gene cluster; conserved RESA domain (CCD: PTZ00341)                                 |
| PF10_0342 (----)   | probable protein, unknown function |                     | -                 | chr10 MSP gene cluster; SP                                                                    |
| MAL8P1.97 (ALVE)   | hypothetical protein               |                     | oocyst SZ         | 12 TM domains; immune response, MDR transporter domain (PlasmoDB); homolog in <i>T. parva</i> |
| PF10_0044 (----)   | hypothetical protein               |                     | -                 | WD40 repeat-like; full EST support; immune response (PlasmoDraft, 80%); upregulated in SZ     |

Same genes as in Table 3 but including graphical RNA-seq expression profiles taken from PlasmoDB 7.1. RNA-seq expression values represent scaled expression values from the intraerythrocytic developmental cycle (IDC) as reported by Bartfai R *et al.* (2010). Diagram tick marks represent hours post infection along the x-axis (10, 20, 30, and 40 h post infection) and normalized coverage (log2) on the y-axis. For remaining legend please refer to legend of Table 3.
