# Supplementary material for: Genome Comparison of Human and Non-Human Malaria Parasites Reveals Species Subset-Specific Genes Potentially Linked to Human Disease
Source: PLoS Comput Biol. 2011 Dec 22;7(12):e1002320. doi: 10.1371/journal.pcbi.1002320 (PMC3245289; doi:10.1371/journal.pcbi.1002320)
Supplement: Table S8 — List of species subset-specific genes as identified by BLAST and genBlastG. Genes in this table underlie the Venn diagram of Figure 1. They are listed together with functional annotations and sequence conservation levels as determined with BLASTP and genBlastG. (XLS) [file pcbi.1002320.s017.xls]

## Sheet: group-specific
pathogen group	gene	desc	comment	GOmolecularFunction	GObiologicalProcess	GOcellularComponent	pfPID	pvPID	pkPID	pcPID	pbPID	pyPID
specific to pfal	PFF0010w	erythrocyte membrane protein 1, PfEMP1		transcription factor activity (GO:0003700);receptor activity (GO:0004872);zinc ion binding (GO:0008270);cell adhesion molecule binding (GO:0050839)	pathogenesis (GO:0009405);cell-cell adhesion (GO:0016337);rosetting (GO:0020013);antigenic variation (GO:0020033);cytoadherence to microvasculature, mediated by parasite protein (GO:0020035)	nucleus (GO:0005634);integral to membrane (GO:0016021);host cell plasma membrane (GO:0020002);infected host cell surface knob (GO:0020030)	0	7.18002	7.17753	1.52725	4.40666	5.10594
specific to pfal	PF14_0002	rifin			antigenic variation (GO:0020033)	membrane (GO:0016020);host cell plasma membrane (GO:0020002)	0	10.19	12.26	5.56777	11.6711	11.8
specific to pfal	PF14_0004	rifin			antigenic variation (GO:0020033)	membrane (GO:0016020);host cell plasma membrane (GO:0020002)	0	1.65761	2.52366	11.1314	9.49555	1.87519
specific to pfal	PFF0015c	rifin			antigenic variation (GO:0020033)	membrane (GO:0016020);host cell plasma membrane (GO:0020002)	0	7.28	10.51	0	0	4.58
specific to pfal	PFL0005w	erythrocyte membrane protein 1, PfEMP1		receptor activity (GO:0004872);host cell surface receptor binding (GO:0046789);cell adhesion molecule binding (GO:0050839)	pathogenesis (GO:0009405);cell-cell adhesion (GO:0016337);rosetting (GO:0020013);antigenic variation (GO:0020033);cytoadherence to microvasculature, mediated by parasite protein (GO:0020035)	integral to membrane (GO:0016021);host cell plasma membrane (GO:0020002);infected host cell surface knob (GO:0020030)	0	8.7236	8.67769	2.85	5.88	5.6933
specific to pfal	PF14_0005	rifin			antigenic variation (GO:0020033)	membrane (GO:0016020);host cell plasma membrane (GO:0020002)	0	7.98226	1.77954	2.85853	11.24	5.27704
specific to pfal	PFF0020c	erythrocyte membrane protein 1 (PfEMP1)-like protein		receptor activity (GO:0004872)	pathogenesis (GO:0009405)	integral to membrane (GO:0016021)	0	12.0879	11.5472	4.91	8.75472	8.98113
specific to pfal	PFI0005w	erythrocyte membrane protein 1, PfEMP1		receptor activity (GO:0004872);cell adhesion molecule binding (GO:0050839)	pathogenesis (GO:0009405);cell-cell adhesion (GO:0016337)	integral to membrane (GO:0016021);host cell plasma membrane (GO:0020002);infected host cell surface knob (GO:0020030)	0	8.72247	8.06167	4.23	5.55	6.78414
specific to pfal	PF14_0006	rifin			antigenic variation (GO:0020033)	membrane (GO:0016020);host cell plasma membrane (GO:0020002)	0	4.92021	4.45906	5.20335	10.6267	10.356
specific to pfal	PFE0005w	erythrocyte membrane protein 1, PfEMP1		receptor activity (GO:0004872);cell adhesion molecule binding (GO:0050839)	pathogenesis (GO:0009405);cell-cell adhesion (GO:0016337);rosetting (GO:0020013);antigenic variation (GO:0020033);cytoadherence to microvasculature, mediated by parasite protein (GO:0020035)	integral to membrane (GO:0016021);host cell plasma membrane (GO:0020002);infected host cell surface knob (GO:0020030)	0	9.88	8.06525	4.03	5.12007	9.01
specific to pfal	MAL13P1.1	erythrocyte membrane protein 1, PfEMP1		receptor activity (GO:0004872)	pathogenesis (GO:0009405)	integral to membrane (GO:0016021)	0	9.71323	8.18686	5.83	5.32	5.91771
specific to pfal	PF08_0142	erythrocyte membrane protein 1, PfEMP1		receptor activity (GO:0004872);cell adhesion molecule binding (GO:0050839)	pathogenesis (GO:0009405);cell-cell adhesion (GO:0016337);rosetting (GO:0020013);antigenic variation (GO:0020033);cytoadherence to microvasculature, mediated by parasite protein (GO:0020035)	integral to membrane (GO:0016021);host cell plasma membrane (GO:0020002);infected host cell surface knob (GO:0020030)	0	9.0566	9.85	5.05	5.18868	6.22642
specific to pfal	PF11_0007	erythrocyte membrane protein 1, PfEMP1		receptor activity (GO:0004872);electron carrier activity (GO:0009055);host cell surface receptor binding (GO:0046789);cell adhesion molecule binding (GO:0050839);iron-sulfur cluster binding (GO:0051536)	pathogenesis (GO:0009405);cell-cell adhesion (GO:0016337);rosetting (GO:0020013);antigenic variation (GO:0020033);cytoadherence to microvasculature, mediated by parasite protein (GO:0020035)	integral to membrane (GO:0016021);host cell plasma membrane (GO:0020002);infected host cell surface knob (GO:0020030)	0	7.79102	8.65385	3.25	8.43263	5.77452
specific to pfal	PF14_0007	stevor				membrane (GO:0016020)	0	0.967413	2.55682	9.80392	8.01782	3.02439
specific to pfal	PFB0010w	erythrocyte membrane protein 1, PfEMP1		receptor activity (GO:0004872);host cell surface receptor binding (GO:0046789);cell adhesion molecule binding (GO:0050839)	pathogenesis (GO:0009405);cell-cell adhesion (GO:0016337);antigenic variation (GO:0020033);cytoadherence to microvasculature, mediated by parasite protein (GO:0020035)	integral to membrane (GO:0016021);host cell plasma membrane (GO:0020002);infected host cell surface knob (GO:0020030)	0	11.2668	11.7475	8.93	6.955	7.12201
specific to pfal	PFL0010c	rifin			antigenic variation (GO:0020033)	membrane (GO:0016020);host cell plasma membrane (GO:0020002)	0	3.77475	9.43168	6.7623	0	0
specific to pfal	PFF0025w	rifin			antigenic variation (GO:0020033)	membrane (GO:0016020);host cell plasma membrane (GO:0020002)	0	0	9.15119	9.4086	11.3636	6.72
specific to pfal	PF14_0008	rifin			antigenic variation (GO:0020033)	membrane (GO:0016020);host cell plasma membrane (GO:0020002)	0	12.4031	0	0	10.5691	9.74659
specific to pfal	PF10_0001	erythrocyte membrane protein 1, PfEMP1		receptor activity (GO:0004872);host cell surface receptor binding (GO:0046789);cell adhesion molecule binding (GO:0050839)	pathogenesis (GO:0009405);cell-cell adhesion (GO:0016337);rosetting (GO:0020013);antigenic variation (GO:0020033);cytoadherence to microvasculature, mediated by parasite protein (GO:0020035)	integral to membrane (GO:0016021);outer membrane (GO:0019867);host cell plasma membrane (GO:0020002);infected host cell surface knob (GO:0020030)	0	8.876	8.43373	7.23	3.8822	7.23
specific to pfal	PFA0005w	erythrocyte membrane protein 1, PfEMP1		catalytic activity (GO:0003824);receptor activity (GO:0004872);cell adhesion molecule binding (GO:0050839)	pathogenesis (GO:0009405);cell-cell adhesion (GO:0016337);rosetting (GO:0020013);antigenic variation (GO:0020033);cytoadherence to microvasculature, mediated by parasite protein (GO:0020035)	integral to membrane (GO:0016021);host cell plasma membrane (GO:0020002);infected host cell surface knob (GO:0020030)	0	9.14127	8.46047	5.73	5.59408	5.50162
specific to pfal	PFI0010c	rifin			antigenic variation (GO:0020033)	membrane (GO:0016020);host cell plasma membrane (GO:0020002)	0	0	10.7427	4.52128	0	11.1688
specific to pfal	PFL0015c	rifin			antigenic variation (GO:0020033)	membrane (GO:0016020);host cell plasma membrane (GO:0020002)	0	2.12544	10.98	8.41	10.66	11.11
specific to pfal	MAL13P1.2	rifin					0	0	8.34341	4.01146	0	0
specific to pfal	MAL7P1.212	erythrocyte membrane protein 1, PfEMP1		receptor activity (GO:0004872)	pathogenesis (GO:0009405)	integral to membrane (GO:0016021)	0	9.163	8.99074	3.13	5.33	5.55
specific to pfal	PFF0035c	rifin			antigenic variation (GO:0020033)	membrane (GO:0016020);host cell plasma membrane (GO:0020002)	0	1.43622	8.22281	4.60863	1.43088	2.03471
specific to pfal	PF08_0141	erythrocyte membrane protein 1, PfEMP1		receptor activity (GO:0004872);cell adhesion molecule binding (GO:0050839)	pathogenesis (GO:0009405);cell-cell adhesion (GO:0016337);rosetting (GO:0020013);antigenic variation (GO:0020033);cytoadherence to microvasculature, mediated by parasite protein (GO:0020035)	integral to membrane (GO:0016021);host cell plasma membrane (GO:0020002);infected host cell surface knob (GO:0020030)	0	6.46627	6.46627	1.36459	4.51	3.9888
specific to pfal	PFL0020w	erythrocyte membrane protein 1, PfEMP1		receptor activity (GO:0004872);host cell surface receptor binding (GO:0046789);cell adhesion molecule binding (GO:0050839)	pathogenesis (GO:0009405);cell-cell adhesion (GO:0016337);rosetting (GO:0020013);antigenic variation (GO:0020033);cytoadherence to microvasculature, mediated by parasite protein (GO:0020035)	integral to membrane (GO:0016021);host cell plasma membrane (GO:0020002);infected host cell surface knob (GO:0020030)	0	7.34266	7.61705	1.82	4.12587	6.33
specific to pfal	PF11_0008	erythrocyte membrane protein 1, PfEMP1		DNA binding (GO:0003677);transcription factor activity (GO:0003700);receptor activity (GO:0004872);binding (GO:0005488);sigma factor activity (GO:0016987);host cell surface receptor binding (GO:0046789);cell adhesion molecule binding (GO:0050839)	transcription initiation (GO:0006352);pathogenesis (GO:0009405);cell-cell adhesion (GO:0016337);rosetting (GO:0020013);antigenic variation (GO:0020033);cytoadherence to microvasculature, mediated by parasite protein (GO:0020035)	integral to membrane (GO:0016021);host cell plasma membrane (GO:0020002);infected host cell surface knob (GO:0020030)	0	10.01	7.08083	4.21	4.34202	4.34202
specific to pfal	PFB0015c	rifin			antigenic variation (GO:0020033)	host cell plasma membrane (GO:0020002)	0	8.08	4.0521	5.38922	3.37237	14.2857
specific to pfal	PFE0020c	rifin			antigenic variation (GO:0020033)	membrane (GO:0016020);host cell plasma membrane (GO:0020002)	0	2.09239	6.83572	4.7619	12.9534	10.2662
specific to pfal	PFI0015c	rifin					0	7.98859	6.94	8.07799	4.18	3.06748
specific to pfal	PFC0005w	erythrocyte membrane protein 1, PfEMP1		receptor activity (GO:0004872)	pathogenesis (GO:0009405)	integral to membrane (GO:0016021)	0	11.17	10.82	4.21	5.11544	5.97555
specific to pfal	PF14_0010	glycophorin binding protein				membrane (GO:0016020)	0	12.1442	3.11601	11.5756	13.6808	9.54274
specific to pfal	PF13_0003	erythrocyte membrane protein 1, PfEMP1		receptor activity (GO:0004872);cell adhesion molecule binding (GO:0050839)	pathogenesis (GO:0009405);cell-cell adhesion (GO:0016337);rosetting (GO:0020013);antigenic variation (GO:0020033);cytoadherence to microvasculature, mediated by parasite protein (GO:0020035)	integral to membrane (GO:0016021);host cell plasma membrane (GO:0020002);infected host cell surface knob (GO:0020030)	0	9.88	5.34488	2.84	5.98	3.64614
specific to pfal	PFE0025c	rifin			antigenic variation (GO:0020033)	membrane (GO:0016020);host cell plasma membrane (GO:0020002)	0	1.60745	3.82009	9.33852	0	0
specific to pfal	PFD0005w	erythrocyte membrane protein 1, PfEMP1		receptor activity (GO:0004872);protein binding (GO:0005515);cell adhesion molecule binding (GO:0050839)	pathogenesis (GO:0009405);cell-cell adhesion (GO:0016337);rosetting (GO:0020013);antigenic variation (GO:0020033);cytoadherence to microvasculature, mediated by parasite protein (GO:0020035)	integral to membrane (GO:0016021);outer membrane (GO:0019867);host cell plasma membrane (GO:0020002);infected host cell surface knob (GO:0020030)	0	8.38685	8.00907	2.76	5.44	6.24
specific to pfal	PF10_0002	rifin			antigenic variation (GO:0020033)	membrane (GO:0016020);host cell plasma membrane (GO:0020002)	0	0	10.3448	4.78755	0	0
specific to pfal	PFB0025c	stevor				membrane (GO:0016020);Maurer's cleft (GO:0020036)	0	4.72654	8.12772	9.21053	10.5263	7.41351
specific to pfal	PFA0010c	rifin			antigenic variation (GO:0020033)	membrane (GO:0016020);host cell plasma membrane (GO:0020002)	0	11.985	6.65761	0	0	14.3284
specific to pfal	MAL7P1.213	rifin					0	11.5607	9.6817	4.54817	2.82828	2.30863
specific to pfal	PFB0030c	rifin			antigenic variation (GO:0020033)	host cell plasma membrane (GO:0020002)	0	11.0874	2.97505	4.90842	4.17607	5.81395
specific to pfal	PF14_0013	DnaJ protein, putative		heat shock protein binding (GO:0031072)			0	2.33516	10.62	11.4786	11.4899	10.8197
specific to pfal	PF10_0003	rifin			antigenic variation (GO:0020033)	membrane (GO:0016020);host cell plasma membrane (GO:0020002)	0	0	0	9.66921	7.38714	0
specific to pfal	PF08_0140	erythrocyte membrane protein 1, PfEMP1		transcription factor activity (GO:0003700);receptor activity (GO:0004872);zinc ion binding (GO:0008270);cell adhesion molecule binding (GO:0050839)	pathogenesis (GO:0009405);cell-cell adhesion (GO:0016337);rosetting (GO:0020013);antigenic variation (GO:0020033);cytoadherence to microvasculature, mediated by parasite protein (GO:0020035)	nucleus (GO:0005634);integral to membrane (GO:0016021);host cell plasma membrane (GO:0020002);infected host cell surface knob (GO:0020030)	0	7.91946	6.57497	1.51	3.99329	6.01
specific to pfal	PFI0025c	rifin			antigenic variation (GO:0020033)	membrane (GO:0016020);host cell plasma membrane (GO:0020002)	0	3.28022	0.95504	11.6279	0	10.31
specific to pfal	PFA0015c	var-like erythrocyte membrane protein 1		receptor activity (GO:0004872)	pathogenesis (GO:0009405)	integral to membrane (GO:0016021)	0	11.8134	12.7831	3.47	8.74152	8.89224
specific to pfal	PFC0010c	rifin					0	2.14674	1.97878	6.92042	2.48162	1.90593
specific to pfal	PFL0025c	rifin			antigenic variation (GO:0020033)	membrane (GO:0016020);host cell plasma membrane (GO:0020002)	0	2.03804	2.90566	7.93173	4.34	2.36938
specific to pfal	PF10_0004	rifin			antigenic variation (GO:0020033)	membrane (GO:0016020);host cell plasma membrane (GO:0020002)	0	0	11.2903	6.60592	12.938	11.9904
specific to pfal	PF11_0009	rifin			antigenic variation (GO:0020033)	membrane (GO:0016020);host cell plasma membrane (GO:0020002)	0	4.50928	1.75593	8.51735	4.9579	2.67104
specific to pfal	PFB0035c	rifin			antigenic variation (GO:0020033)	host cell plasma membrane (GO:0020002)	0	0	1.76783	0	0	9.6
specific to pfal	PFI0030c	rifin			antigenic variation (GO:0020033)	membrane (GO:0016020);host cell plasma membrane (GO:0020002)	0	10.9325	11.0932	10.0817	11.2811	2.44328
specific to pfal	MAL7P1.215	rifin					0	5.62865	6.46	0	0	0
specific to pfal	PF13_0004	rifin			antigenic variation (GO:0020033)	membrane (GO:0016020);host cell plasma membrane (GO:0020002)	0	0	2.65781	9.62099	9.51087	8.21918
specific to pfal	PFL0030c	erythrocyte membrane protein 1, PfEMP1		receptor activity (GO:0004872);host cell surface receptor binding (GO:0046789);cell adhesion molecule binding (GO:0050839)	pathogenesis (GO:0009405);cell-cell adhesion (GO:0016337);rosetting (GO:0020013);antigenic variation (GO:0020033);cytoadherence to microvasculature, mediated by parasite protein (GO:0020035)	integral to membrane (GO:0016021);host cell plasma membrane (GO:0020002);infected host cell surface knob (GO:0020030)	0	6.64267	7.54902	7.56	4.25	4.25393
specific to pfal	PF10_0005	rifin			antigenic variation (GO:0020033)	membrane (GO:0016020);host cell plasma membrane (GO:0020002)	0	1.84783	1.86407	8.67209	5.95238	7.30539
specific to pfal	PF11_0010	rifin			antigenic variation (GO:0020033)	membrane (GO:0016020);host cell plasma membrane (GO:0020002)	0	0	11.04	0	8.27179	10.53
specific to pfal	PFD0015c	rifin			antigenic variation (GO:0020033)	membrane (GO:0016020);host cell plasma membrane (GO:0020002)	0	1.92216	8.53485	9.69609	11.0811	12.5668
specific to pfal	PFB0040c	rifin			antigenic variation (GO:0020033)	membrane (GO:0016020);host cell plasma membrane (GO:0020002)	0	0	4.96084	2.89283	0	4.42611
specific to pfal	PFI0035c	rifin			antigenic variation (GO:0020033)	membrane (GO:0016020);host cell plasma membrane (GO:0020002)	0	0	0	13.1635	12.79	8.93855
specific to pfal	PFC0025c	stevor				membrane (GO:0016020);Maurer's cleft (GO:0020036)	0	4.76562	0	11.7845	12.9973	1.56643
specific to pfal	PFA0020w	rifin			antigenic variation (GO:0020033)	membrane (GO:0016020);host cell plasma membrane (GO:0020002)	0	4.97547	3.56633	12.5	7.87879	9.49464
specific to pfal	PF13_0005	rifin			antigenic variation (GO:0020033)	membrane (GO:0016020);host cell plasma membrane (GO:0020002)	0	14.3713	9.55882	8.03443	3.78072	4.93097
specific to pfal	PF10_0006	rifin			antigenic variation (GO:0020033)	membrane (GO:0016020);host cell plasma membrane (GO:0020002)	0	3.54938	0	0	9.10931	9.67118
specific to pfal	PFB0045c	erythrocyte membrane protein 1 (PfEMP1), truncated					0	5.36013	9.78	9.40893	11.2	9.86
specific to pfal	MAL7P1.216	rifin					0	8.96739	9.03084	12.6582	0	3.51785
specific to pfal	PFD0020c	erythrocyte membrane protein 1, PfEMP1		receptor activity (GO:0004872);cell adhesion molecule binding (GO:0050839)	pathogenesis (GO:0009405);cell-cell adhesion (GO:0016337);rosetting (GO:0020013);antigenic variation (GO:0020033);cytoadherence to microvasculature, mediated by parasite protein (GO:0020035)	integral to membrane (GO:0016021);host cell plasma membrane (GO:0020002);infected host cell surface knob (GO:0020030)	0	6.3076	10.03	1.27	3.31699	3.7208
specific to pfal	PFC0030c	rifin			antigenic variation (GO:0020033)	membrane (GO:0016020);host cell plasma membrane (GO:0020002)	0	12.7371	4.28937	9.7493	5.37445	7.24
specific to pfal	PF08_0139	rifin			antigenic variation (GO:0020033)	membrane (GO:0016020);host cell plasma membrane (GO:0020002)	0	2.27808	10.2273	4.20776	11.17	2.00599
specific to pfal	PFA0030c	rifin			antigenic variation (GO:0020033)	membrane (GO:0016020);host cell plasma membrane (GO:0020002)	0	0	1.67627	9.47075	8.91	9.75
specific to pfal	PFI0045c	stevor					0	11.1111	5.43672	11	11.3333	3.88529
specific to pfal	MAL7P1.217	rifin					0	11.976	4.45378	11.4019	7.88043	9.97305
conserved in all	PF14_0017	lysophospholipase, putative		hydrolase activity (GO:0016787)			0	51.46	53.74	40.57	48.01	47.75
specific to pfal	MAL13P1.4	rifin					0	5.03903	9.29432	6.61241	10	5.96206
specific to pfal	PF08_0138	rifin			antigenic variation (GO:0020033)	membrane (GO:0016020);host cell plasma membrane (GO:0020002)	0	0	8.22281	4.14201	14.0212	10.8108
specific to pfal	PFB0055c	rifin			antigenic variation (GO:0020033)	host cell plasma membrane (GO:0020002)	0	5.88785	0.822803	10.2249	10.1083	9.29
specific to pfal	PFC0035w	rifin			antigenic variation (GO:0020033)	membrane (GO:0016020);host cell plasma membrane (GO:0020002)	0	0	3.3861	0	0	1.52006
specific to pfal	PFI0050c	rifin					0	1.69205	0	9.53307	12.5	0
specific to pfal	MAL7P1.218	stevor					0	3.54291	10.53	7.08181	12.3348	7.91925
specific to pfal	PFA0040w	rifin			antigenic variation (GO:0020033)	membrane (GO:0016020);host cell plasma membrane (GO:0020002)	0	8.43931	10.8929	11.9186	10.4651	0
specific to pfal	PFB0056c	hypothetical protein					0	0.929235	3.17797	4.03587	2.8777	1.27389
specific to pfal	MAL13P1.6	erythrocyte membrane protein 1-like					0	10.9344	6.45933	12.1896	4.66712	3.83795
specific to pfal	PFC0040w	rifin					0	4.18773	9.97067	13.3663	8.99123	11.53
specific to pfal	PFI0055c	rifin			antigenic variation (GO:0020033)	membrane (GO:0016020);host cell plasma membrane (GO:0020002)	0	5.11527	3.9599	4.24929	14.1935	11.1717
specific to pfal	MAL7P1.219	rifin					0	9.71787	5.074	5.25803	11.1922	3.78267
specific to pfal	PFA0045c	rifin			antigenic variation (GO:0020033)	membrane (GO:0016020);host cell plasma membrane (GO:0020002)	0	8.18554	5.64263	10.4478	8.27179	9.69163
specific to pfal	PFB0060w	rifin			antigenic variation (GO:0020033)	host cell plasma membrane (GO:0020002)	0	4.46009	0	11.9898	10.3352	0
specific to pfal	PFE0060w	parasite-infected erythrocyte surface protein				cell surface (GO:0009986);Maurer's cleft (GO:0020036);host cell (GO:0043657)	0	12.2105	13.76	14.71	14.1454	14.22
specific to pfal	PFC0045w	rifin				apicoplast (GO:0020011)	0	5.80046	3.50365	9.29204	7.89074	14.9007
specific to pfal	PFA0050c	rifin			antigenic variation (GO:0020033)	membrane (GO:0016020);host cell plasma membrane (GO:0020002)	0	0	0	9.49721	7.15859	11.39
specific to pfal	PFD0025w	rifin			antigenic variation (GO:0020033)	membrane (GO:0016020);host cell plasma membrane (GO:0020002)	0	4.23242	11.6484	9.68586	8.37696	10.2094
specific to pfal	PFB0065w	stevor				membrane (GO:0016020);Maurer's cleft (GO:0020036)	0	6.00775	0	10.6667	13.9159	7.29614
specific to pfal	PF11_0529	rifin			antigenic variation (GO:0020033)	membrane (GO:0016020);host cell plasma membrane (GO:0020002)	0	0.978635	8.10157	6.30372	11.0016	8.41584
specific to pfal	PFI0065w	rifin					0	2.63587	2.58398	5.12821	2.91	4.69841
specific to pfal	MAL8P1.162	surface-associated interspersed gene 8.3 (SURFIN8.3)					0	11.4464	9.74	7.07	12.0312	7.9099
conserved in all	PFF0080c	TRAP-like protein, putative					0	72.2603	71.92	57.9805	59.4406	51.9031
specific to pfal	PFD0030c	rifin			antigenic variation (GO:0020033)	membrane (GO:0016020);host cell plasma membrane (GO:0020002)	0	3.90772	7.85973	9.49153	0	0
specific to pfal	PF11_0020	rifin			antigenic variation (GO:0020033)	membrane (GO:0016020);host cell plasma membrane (GO:0020002)	0	11.7284	5.9	5.81818	2.13989	0
specific to pfal	MAL7P1.222	rifin					0	1.29362	3.7594	6.63812	7.0922	10.0156
specific to pfal	PFI0070w	rifin					0	10.9244	5.66406	10.789	14.4928	9.39227
specific to pfal	PFD0035c	stevor				membrane (GO:0016020);Maurer's cleft (GO:0020036)	0	6.88913	10.1423	9.94624	11.4286	1.34266
specific to pfal	PF13_0010	glycophorin binding protein					0	9.43613	7.21358	11.9048	12.6516	12.5249
specific to pfal	PF11_0021	rifin			antigenic variation (GO:0020033)	membrane (GO:0016020);host cell plasma membrane (GO:0020002)	0	11.1386	9.6248	10.7143	0	2.00599
specific to pfal	MAL7P1.223	stevor					0	8.61759	13.5392	12.46	5.54042	5.56569
specific to pfal	PFI0075w	rifin			antigenic variation (GO:0020033)	membrane (GO:0016020);host cell plasma membrane (GO:0020002)	0	13.2701	12.3288	13.6082	13.7	9.32
specific to pfal	PFE0070w	interspersed repeat antigen		hormone activity (GO:0005179)		extracellular region (GO:0005576)	0	10.9122	9.65	5.98837	5.58	9.06977
specific to pfal	PFD0040c	rifin			antigenic variation (GO:0020033)	membrane (GO:0016020);host cell plasma membrane (GO:0020002)	0	4.61976	0	6.44172	8.51064	5.20833
specific to pfal	PFB0080c	Plasmodium exported protein (PHISTb), unknown function				cytoplasm (GO:0005737);membrane (GO:0016020);host cell part (GO:0033643)	0	14.8	11.0092	10.72	11.13	13.93
specific to pfal	PFI0080w	stevor				membrane (GO:0016020);Maurer's cleft (GO:0020036)	0	2.12544	11.2211	6.42939	6.17849	2.19512
specific to pfal	MAL13P1.58	Plasmodium exported protein (PHISTa-like), unknown function					0	8.17121	3.69541	1.51216	3.26209	6.73684
specific to pfal	PFD0045c	rifin			antigenic variation (GO:0020033)	membrane (GO:0016020);host cell plasma membrane (GO:0020002)	0	7.36976	10.68	14.89	5.74413	10.5263
specific to pfal	PFA0080c	rifin			antigenic variation (GO:0020033)	membrane (GO:0016020);host cell plasma membrane (GO:0020002)	0	4.19664	4.59184	4.96709	0	7.21649
specific to pfal	MAL8P1.160	Plasmodium exported protein (hyp7), unknown function		ATP binding (GO:0005524)			0	0	3.4931	14.49	10.2778	0
conserved in all	PF14_0024	conserved Plasmodium protein, unknown function		glutamate-tRNA ligase activity (GO:0004818);ATP binding (GO:0005524)	translation (GO:0006412);glutamyl-tRNA aminoacylation (GO:0006424)	cytoplasm (GO:0005737);membrane (GO:0016020)	0	70.53	69.4737	73.16	59.38	74.2105
specific to pfal	PFD0050w	rifin			antigenic variation (GO:0020033)	membrane (GO:0016020);host cell plasma membrane (GO:0020002)	0	4.62509	4.85368	10.0817	8.95706	4.62478
specific to pfal	PFA0090c	stevor				membrane (GO:0016020);Maurer's cleft (GO:0020036)	0	4.33186	4.44444	9.68858	11.0727	13.6364
specific to pfal	PFD0055w	rifin			antigenic variation (GO:0020033)	membrane (GO:0016020);host cell plasma membrane (GO:0020002)	0	6.97455	1.77736	8.8	7.2	0
specific to pfal	PFC0080c	Plasmodium exported protein (hyp1), unknown function		structural constituent of cell wall (GO:0005199)		extracellular region (GO:0005576);apicoplast (GO:0020011)	0	8.85246	4.28447	12.0055	13.39	14.67
specific to pfal	PFA0095c	rifin			antigenic variation (GO:0020033)	membrane (GO:0016020);host cell plasma membrane (GO:0020002)	0	10.5	5.60837	0	5.54	7.29
specific to pfal	PFL0060w	Plasmodium exported protein, unknown function				membrane (GO:0016020)	0	2.58197	2.14315	7.78547	9.50226	9.50226
specific to pfal	PFD0060w	rifin			antigenic variation (GO:0020033)	membrane (GO:0016020);host cell plasma membrane (GO:0020002)	0	11.1675	2.3766	4.77981	11.4035	9.83264
conserved in all	PF14_0027	40S ribosomal protein S31/UBI, putative		structural constituent of ribosome (GO:0003735)	translation (GO:0006412)	intracellular (GO:0005622);ribosome (GO:0005840);cytosolic small ribosomal subunit (GO:0022627)	0	79.87	79.87	53.02	81.88	83.2215
specific to pfal	PFA0100c	Plasmodium exported protein (PHISTa), unknown function		transferase activity (GO:0016740)		cytoplasm (GO:0005737);membrane (GO:0016020)	0	9.52381	2.39549	13.02	6.84736	6.20438
specific to pfal	PFB0095c	erythrocyte membrane protein 3				membrane (GO:0016020)	0	6.43179	6.87961	4.17862	7.54	13.3578
conserved in all	PF14_0028	pre-mRNA splicing factor, putative		nucleic acid binding (GO:0003676);RNA binding (GO:0003723)	RNA processing (GO:0006396)		0	64.48	63.77	48.7	55.6391	56.63
specific to pfal	PF11_0033	probable protein, unknown function		protein binding (GO:0005515)		nucleus (GO:0005634);cytoplasm (GO:0005737);plasma membrane (GO:0005886)	0	9.64813	8.96708	8.74007	7.15096	10.2941
conserved in all	PFF0105w	MYND finger protein, putative		zinc ion binding (GO:0008270)			0	74.6	71.5909	75.3846	75.8621	62.41
conserved in all	PFF0115c	elongation factor G, putative		translation elongation factor activity (GO:0003746);GTPase activity (GO:0003924);GTP binding (GO:0005525)	translational elongation (GO:0006414)	apicoplast (GO:0020011)	0	71.5933	72.51	64.916	70.97	65.1
specific to pfal	PF13_0075	surface-associated interspersed gene 13.1 (SURFIN13.1)					0	10.8004	10.1667	5.33	8.17	3.22222
conserved in all	PFF0120w	geranylgeranyltransferase, putative		catalytic activity (GO:0003824);protein geranylgeranyltransferase activity (GO:0004661)	protein amino acid geranylgeranylation (GO:0018348)		0	66.67	63.59	67.53	68.8144	66.4948
specific to pfal	PF08_0136	hypothetical protein		DNA binding (GO:0003677);transferase activity (GO:0016740)			0	12.1212	13.9073	7.32601	2.8921	3.47958
specific to pfal	PFD0075w	conserved Plasmodium falciparum protein family				apicoplast (GO:0020011)	0	8.07	13.8	9.64	13.02	8.85
specific to pfal	PF10_0026	tryptophan-rich antigen 3			Mo-molybdopterin cofactor biosynthetic process (GO:0006777)	cell surface (GO:0009986);membrane (GO:0016020)	0	14.04	14.5308	8.68	6.03	8.24121
conserved in all	PFL0110c	mitochondrial phosphate carrier protein		binding (GO:0005488)	transport (GO:0006810)	mitochondrion (GO:0005739);mitochondrial inner membrane (GO:0005743);membrane (GO:0016020)	0	86.42	86.73	53.09	63.4969	86.1111
specific to pfal	PF11_0037	Plasmodium exported protein (PHISTb), unknown function				membrane (GO:0016020)	0	12.89	10.9125	9.77564	13.2353	13.3
conserved in all	PFE0130c	conserved Plasmodium protein, unknown function					0	52.66	52.53	53.1646	53.9241	54.94
conserved in all	PFE0135w	DnaJ protein, putative		heat shock protein binding (GO:0031072)			0	63.12	60.28	56.21	55.8442	57.7922
conserved in all	PFE0140c	mitochondrial inner membrane TIM10 associated protein, putative			protein targeting to mitochondrion (GO:0006626);protein import into mitochondrial inner membrane (GO:0045039)	mitochondrial intermembrane space protein transporter complex (GO:0042719)	0	90.2439	90.2439	85.37	82.93	84.15
specific to primate	PFL0115w	dynein heavy chain, putative		microtubule motor activity (GO:0003777)	microtubule-based movement (GO:0007018)	apicoplast (GO:0020011);dynein complex (GO:0030286)	0	57.69	57.0617	7.90024	3.68302	8.73702
conserved in all	PFE0145w	organelle ribosomal protein L28 precursor, putative		structural constituent of ribosome (GO:0003735)	translation (GO:0006412)	intracellular (GO:0005622);ribosome (GO:0005840);large ribosomal subunit (GO:0015934);apicoplast (GO:0020011)	0	55.72	59.176	51.91	53.61	53.23
conserved in all	PFF0155w	mitochondrial chaperone BCS1, putative		nucleotide binding (GO:0000166);ATP binding (GO:0005524);ATPase activity (GO:0016887);nucleoside-triphosphatase activity (GO:0017111)	protein complex assembly (GO:0006461)	mitochondrial inner membrane (GO:0005743)	0	72.57	73.85	75.2621	41.9958	52.5773
specific to pfal	PFD0095c	Plasmodium exported protein (PHISTb), unknown function			protein folding (GO:0006457)	membrane (GO:0016020)	0	10.76	10.26	12.48	14.09	12.21
specific to pfal	PF07_0003	rifin			antigenic variation (GO:0020033)	membrane (GO:0016020);host cell plasma membrane (GO:0020002)	0	5.07192	5.18519	0	0	10.1727
conserved in all	PFA0150c	conserved Plasmodium protein, unknown function				cytoplasm (GO:0005737)	0	55	54.23	40.15	50.19	48.12
conserved in all	PF14_0034	translocation associated membrane protein, putative		protein binding (GO:0005515)	intracellular protein transmembrane transport (GO:0065002)	endoplasmic reticulum membrane (GO:0005789);integral to membrane (GO:0016021)	0	63.2312	62.9526	45.43	49.86	57.38
conserved in all	PFI0155c	Rab GTPase 7		GTPase activity (GO:0003924);protein binding (GO:0005515);GTP binding (GO:0005525)	intracellular protein transport (GO:0006886);nucleocytoplasmic transport (GO:0006913);signal transduction (GO:0007165);small GTPase mediated signal transduction (GO:0007264);protein transport (GO:0015031);regulation of vesicle-mediated transport (GO:0060627)	intracellular (GO:0005622);vacuole (GO:0005773);membrane (GO:0016020)	0	97.09	96.6019	94.17	83.5	95.15
specific to pfal	PF07_0004	Plasmodium exported protein, unknown function		motor activity (GO:0003774);actin binding (GO:0003779);calmodulin binding (GO:0005516);ATP binding (GO:0005524)		cytoplasm (GO:0005737);myosin complex (GO:0016459)	0	10.24	13.17	10.5684	13.278	6.95021
specific to pfal	PFD0100c	surface-associated interspersed gene 4.1, (SURFIN4.1)					0	9.8012	4.04	4.17	7.93135	9.69388
specific to pfal	PF11_0042	conserved Plasmodium protein, unknown function					0	0	0	2.48042	2.68456	3.92638
conserved in all	PFE0165w	actin-depolymerizing factor		actin binding (GO:0003779);actin monomer binding (GO:0003785);actin filament binding (GO:0051015)	actin cytoskeleton organization (GO:0030036);cytoplasmic actin-based contraction involved in cell motility (GO:0060327)	intracellular (GO:0005622);actin cytoskeleton (GO:0015629)	0	90.1639	89.3443	49.1803	86.89	69.9187
specific to primate	PF14_0036	phosphatase, putative		hydrolase activity (GO:0016787)			0	69.4631	69.4631	7.38	9.73	13.0872
conserved in all	PFC0126c	PFMNL-1 CISD1-like iron-sulfur protein, putative		2 iron, 2 sulfur cluster binding (GO:0051537)		intracellular membrane-bounded organelle (GO:0043231)	0	70.3947	70.39	51.25	43.9306	57.99
conserved in all	PF13_0013	deoxyhypusine hydroxylase		binding (GO:0005488)			0	64.72	63.02	47.2019	49.15	41.2621
conserved in all	PF14_0037	conserved Plasmodium protein, unknown function		nucleotide binding (GO:0000166);catalytic activity (GO:0003824)	cellular metabolic process (GO:0044237)		0	63.16	63.16	48.2143	46.11	67.07
specific to pfal	MAL7P1.7	Plasmodium exported protein (PHISTb), unknown function		metal ion binding (GO:0046872)		nucleus (GO:0005634);membrane (GO:0016020)	0	8.84544	11.91	10.8475	10.44	12.07
conserved in all	PF14_0038	cytochrome c, putative		iron ion binding (GO:0005506);electron carrier activity (GO:0009055);heme binding (GO:0020037)	electron transport (GO:0006118)	mitochondrion (GO:0005739);mitochondrial respiratory chain (GO:0005746)	0	94.02	92.2414	92.2414	92.2414	93.1034
conserved in all	PFC0130c	conserved Plasmodium protein, unknown function		RNA binding (GO:0003723)			0	55.92	53.18	55.8621	56.16	57.86
conserved in all	PF10_0034a	conserved Plasmodium protein, unknown function					0	81.0526	82.11	79.79	72.381	80.85
conserved in all	PFE0175c	myosin B		motor activity (GO:0003774);actin binding (GO:0003779);ATP binding (GO:0005524)		myosin complex (GO:0016459)	0	80.2747	80.5243	71.4819	64.0741	70.49
conserved in all	PF10_0036	N-acetyltransferase, putative		N-acetyltransferase activity (GO:0008080)	metabolic process (GO:0008152)		0	78.95	78.29	61.18	43.299	75
conserved in all	PF13_0014	40S ribosomal protein S7, putative		structural constituent of ribosome (GO:0003735)	translation (GO:0006412)	intracellular (GO:0005622);ribosome (GO:0005840);cytosolic small ribosomal subunit (GO:0022627)	0	90.7216	90.21	61.3402	86.6	85.57
conserved in all	PFE0185c	60S ribosomal protein L31, putative		structural constituent of ribosome (GO:0003735)	translation (GO:0006412)	intracellular (GO:0005622);ribosome (GO:0005840);large ribosomal subunit (GO:0015934)	0	88.3333	90.8333	85	88.33	61.67
conserved in all	PF14_0041	mitochondrial ribosomal protein L16 precursor, putative		structural constituent of ribosome (GO:0003735)	translation (GO:0006412)	plastid large ribosomal subunit (GO:0000311);intracellular (GO:0005622);ribosome (GO:0005840)	0	82.3204	83.43	83.61	84.153	84.7
conserved in all	PFF0180w	phenylalanyl-tRNA synthetase subunit, putative		tRNA binding (GO:0000049);nucleotide binding (GO:0000166);magnesium ion binding (GO:0000287);aminoacyl-tRNA ligase activity (GO:0004812);phenylalanine-tRNA ligase activity (GO:0004826);ATP binding (GO:0005524)	translation (GO:0006412);tRNA aminoacylation for protein translation (GO:0006418);phenylalanyl-tRNA aminoacylation (GO:0006432);tRNA processing (GO:0008033)	cytoplasm (GO:0005737)	0	57.3	56.99	62.1924	48.2222	59.96
conserved in all	PF14_0042	U3 small nucleolar ribonucleoprotein, U3 snoRNP, putative			RNA processing (GO:0006396)	intracellular (GO:0005622)	0	51.7	51.91	45.0734	58.14	57.0833
conserved in all	PFE0190c	conserved Plasmodium protein, unknown function					0	48.1873	48.04	50.0743	42.86	50.15
conserved in all	PFC0140c	N-ethylmaleimide sensitive fusion protein, putative		nucleotide binding (GO:0000166);binding (GO:0005488);ATP binding (GO:0005524);ATPase activity (GO:0016887);nucleoside-triphosphatase activity (GO:0017111)	ER to Golgi vesicle-mediated transport (GO:0006888)		0	80.23	80.4847	54.71	62.89	56.2341
conserved in all	PF11_0047	actin-like protein, putative		protein binding (GO:0005515)			0	76.7535	77.76	64.0316	46.0922	41.8146
conserved in all	MAL13P1.15	conserved Plasmodium protein, unknown function		hydrolase activity (GO:0016787)		integral to membrane (GO:0016021)	0	70.09	70.09	73.5043	76.07	74.36
conserved in all	PF13_0016	methyltransferase-like protein, putative		nucleic acid binding (GO:0003676);methyltransferase activity (GO:0008168);N-methyltransferase activity (GO:0008170)	methylation (GO:0032259)		0	62.3318	65.0224	42.3423	61.2335	61.2335
conserved in all	PF11_0048	casein kinase II beta chain		protein serine/threonine kinase activity (GO:0004674);protein kinase regulator activity (GO:0019887)		protein kinase CK2 complex (GO:0005956)	0	86.94	86.1224	82.0408	81.6327	83.27
conserved in all	PFB0160w	ERCC1 nucleotide excision repair protein, putative		damaged DNA binding (GO:0003684);endonuclease activity (GO:0004519);endodeoxyribonuclease activity (GO:0004520)	DNA repair (GO:0006281);nucleotide-excision repair (GO:0006289)	nucleus (GO:0005634)	0	70.6612	69.6721	66.12	64.0496	63.2231
conserved in all	MAL13P1.16	SNARE protein, putative		SNAP receptor activity (GO:0005484);protein binding (GO:0005515)	transport (GO:0006810);vesicle-mediated transport (GO:0016192);regulation of vesicle fusion (GO:0031338)	integral to membrane (GO:0016021);SNARE complex (GO:0031201)	0	84.1346	85.1	61.54	78.8462	76.44
conserved in all	PFB0161c	conserved Plasmodium protein, unknown function				cytoplasm (GO:0005737)	0	70.3297	68.1319	44.27	57.1429	62.64
conserved in all	PFL0145c	high mobility group protein		DNA binding (GO:0003677);DNA bending activity (GO:0008301)	positive regulation of cytokine production (GO:0001819);regulation of transcription (GO:0045449)	nucleus (GO:0005634);chromosome (GO:0005694);cytosol (GO:0005829)	0	87.76	86.7347	79.6117	84.54	82.47
conserved in all	PF10_0039	membrane skeletal protein IMC1-related			cytoskeleton organization (GO:0007010)	subpellicular network (GO:0020038)	0	73.78	77.2727	71.5302	71.1744	59.72
conserved in all	PFB0175c	nucleolar preribosomal assembly protein, putative					0	56.5611	56.3348	43.44	40.95	59.95
conserved in all	PFA0190c	actin-related protein		structural constituent of cytoskeleton (GO:0005200);protein binding (GO:0005515)		actin cytoskeleton (GO:0015629)	0	92.11	91.58	90.5263	90.7895	89.32
conserved in all	PFC0155c	DNA-directed RNA polymerase subunit I, putative		DNA binding (GO:0003677);DNA-directed RNA polymerase activity (GO:0003899)	transcription from RNA polymerase II promoter (GO:0006366)	DNA-directed RNA polymerase II, core complex (GO:0005665)	0	84.4156	85.06	83.66	41.4013	84.31
conserved in all	PFB0177c	conserved Plasmodium protein, unknown function					0	70.71	71.04	50.09	75.99	75.09
conserved in all	PFI0180w	alpha tubulin 1		GTPase activity (GO:0003924);structural molecule activity (GO:0005198);GTP binding (GO:0005525)	microtubule-based process (GO:0007017);microtubule-based movement (GO:0007018);protein polymerization (GO:0051258)	microtubule (GO:0005874);protein complex (GO:0043234)	0	98.9	98.68	47.0199	89.6247	93.6
conserved in all	PF07_0011	conserved Plasmodium protein, unknown function					0	76.1111	75	41.6667	76.1111	74.73
conserved in all	PFE0225w	3-methyl-2-oxobutanoate dehydrogenase (lipoamide), putative		catalytic activity (GO:0003824);3-methyl-2-oxobutanoate dehydrogenase (2-methylpropanoyl-transferring) activity (GO:0003863)	tricarboxylic acid cycle (GO:0006099);metabolic process (GO:0008152)	mitochondrial tricarboxylic acid cycle enzyme complex (GO:0030062)	0	79.58	79.5812	78.8512	77.2846	78.0105
conserved in all	PF10_0043	60S ribosomal protein L13, putative		structural constituent of ribosome (GO:0003735)	translation (GO:0006412)	intracellular (GO:0005622);ribosome (GO:0005840);large ribosomal subunit (GO:0015934);cytosolic large ribosomal subunit (GO:0022625)	0	91.09	90.1	47.06	85.64	86.63
conserved in all	PF14_0049	sybindin-like protein, putative			transport (GO:0006810);ER to Golgi vesicle-mediated transport (GO:0006888)	cis-Golgi network (GO:0005801)	0	64.95	67.0103	61.39	60.8911	57.2139
conserved in all	PFF0205w	mitochondrial ribosomal protein L41 precursor, putative					0	86.0215	82.8	83.87	83.871	83.871
conserved in all	PFL0175c	conserved Plasmodium protein, unknown function					0	48.4536	51.79	53.41	55.58	42.73
specific to pfal	PF10_0044	hypothetical protein		ATP binding (GO:0005524)			0	12.0805	12.1795	5.04202	12.521	8.48739
conserved in all	PFL0180w	cytochrome c1 heme lyase, putative		holocytochrome-c synthase activity (GO:0004408)	electron transport (GO:0006118)	mitochondrion (GO:0005739);mitochondrial inner membrane (GO:0005743)	0	66.3	65.7609	67.9348	63.49	65.0794
conserved in all	PFI0190w	60S ribosomal protein L32, putative		structural constituent of ribosome (GO:0003735)	translation (GO:0006412)	intracellular (GO:0005622);ribosome (GO:0005840)	0	93.8931	94.66	77.86	94.66	94.66
conserved in all	PFC0166w	plasmoredoxin		thiol-disulfide exchange intermediate activity (GO:0030508)	protein thiol-disulfide exchange (GO:0006467)		0	64.8045	66.4804	69.8324	69.2737	70.95
conserved in all	PFL0185c	nucleosome assembly protein		DNA binding (GO:0003677);histone binding (GO:0042393)	nucleosome assembly (GO:0006334)	nucleus (GO:0005634);cytoplasm (GO:0005737)	0	96.8391	96.5517	94.5245	93.3718	76.37
conserved in all	PFC0176c	conserved Plasmodium protein, unknown function					0	51.27	52.2843	49.24	49.75	48.731
conserved in all	PFL0190w	ubiquitin conjugating enzyme E2, putative		ubiquitin-protein ligase activity (GO:0004842);ATPase activity (GO:0016887);small conjugating protein ligase activity (GO:0019787)	protein modification process (GO:0006464);regulation of cell cycle process (GO:0010564);ER-associated protein catabolic process (GO:0030433);post-translational protein modification (GO:0043687);regulation of protein metabolic process (GO:0051246);ubiquitin cycle (GO:0006512)	endoplasmic reticulum (GO:0005783)	0	99.3197	99.3197	100	100	100
conserved in all	MAL8P1.148	conserved Plasmodium protein, unknown function		ATP binding (GO:0005524)		cytoplasm (GO:0005737)	0	48.53	51.11	54.8148	58.52	54.81
conserved in all	PF11_0055	conserved protein, unknown function		protein disulfide isomerase activity (GO:0003756)	cell redox homeostasis (GO:0045454)	endoplasmic reticulum (GO:0005783);endoplasmic reticulum lumen (GO:0005788);apicoplast (GO:0020011)	0	80.19	78.77	75	48.13	74.7642
conserved in all	PFB0196c	dynein light chain, putative		microtubule motor activity (GO:0003777)	microtubule-based process (GO:0007017)	microtubule associated complex (GO:0005875)	0	91.59	90.6542	85.05	71.96	90.65
conserved in all	PFI0205w	conserved Plasmodium protein, unknown function				membrane (GO:0016020);apicoplast (GO:0020011)	0	53.9474	53.85	44.03	51.85	52.22
conserved in all	MAL7P1.13	conserved Plasmodium protein, unknown function					0	77.78	81.2734	63.36	74.81	72.9
specific to primate	PFF0225w	DNA helicase, putative		nucleic acid binding (GO:0003676);DNA binding (GO:0003677);translation initiation factor activity (GO:0003743);ATP-dependent DNA helicase activity (GO:0004003);endonuclease activity (GO:0004519);ATP binding (GO:0005524)	translational initiation (GO:0006413)		0	41.75	42.53	11.62	10.86	9.74898
conserved in all	PFD0165w	ubiquitin specific protease, putative		ubiquitin thiolesterase activity (GO:0004221)	ubiquitin-dependent protein catabolic process (GO:0006511);protein deubiquitination (GO:0016579)	proteasome complex (GO:0000502)	0	63.6816	64.43	66	65.75	66
conserved in all	PFC0190c	EH (Eps15 homology) protein		GTPase activity (GO:0003924);protein binding (GO:0005515);GTP binding (GO:0005525)			0	88.83	89.013	45.9662	82.55	63.1481
conserved in all	PFA0225w	4-hydroxy-3-methylbut-2-enyl diphosphate reductase			isopentenyl diphosphate biosynthetic process, mevalonate-independent pathway (GO:0019288)	apicoplast (GO:0020011)	0	49.4403	47.6619	44.61	47.15	53.3333
conserved in all	PF11_0058-b	RNA polymerase subunit, putative		DNA-directed RNA polymerase activity (GO:0003899)	transcription (GO:0006350)		0	83.871	83.871	43.55	66.8449	80.65
conserved in all	PFA0230c	conserved Plasmodium protein, unknown function					0	65.88	56.5517	65.625	65.625	64.23
conserved in all	PFF0230c	glyoxalase I		lactoylglutathione lyase activity (GO:0004462)	methylglyoxal metabolic process (GO:0009438)	apicoplast (GO:0020011)	0	58.58	57.01	58.52	59.6215	63.14
conserved in all	PFL0210c	eukaryotic initiation factor 5a, putative		RNA binding (GO:0003723);translation initiation factor activity (GO:0003743);translation elongation factor activity (GO:0003746);ribosome binding (GO:0043022)	translational initiation (GO:0006413);translational frameshifting (GO:0006452);peptidyl-lysine modification to hypusine (GO:0008612);positive regulation of translational elongation (GO:0045901);positive regulation of translational termination (GO:0045905)		0	93.79	93.17	95.0311	95.0311	95.0311
conserved in all	PFI0215c	signal peptidase, putative		peptidase activity (GO:0008233)	signal peptide processing (GO:0006465)	signal peptidase complex (GO:0005787);integral to membrane (GO:0016021)	0	80.5405	81.6216	72.4324	76.76	77.84
conserved in all	PFI0220w	prefoldin subunit, putative		unfolded protein binding (GO:0051082)	protein folding (GO:0006457)	prefoldin complex (GO:0016272)	0	68.9922	68.9922	73.6434	72.87	73.64
conserved in all	PFB0215c	3'-5' exonuclease, putative		nucleic acid binding (GO:0003676);3'-5' exonuclease activity (GO:0008408)	nucleobase, nucleoside, nucleotide and nucleic acid metabolic process (GO:0006139)	intracellular (GO:0005622);mitochondrion (GO:0005739)	0	47.04	47.5177	50.9524	50.96	50.36
conserved in all	PF14_0057	RNA binding protein, putative		nucleic acid binding (GO:0003676);RNA binding (GO:0003723);mRNA binding (GO:0003729)	RNA processing (GO:0006396)	nucleus (GO:0005634);cytoplasm (GO:0005737)	0	82.243	81.31	66.36	55.1402	59.63
conserved in all	MAL8P1.145	mitogen-activated protein kinase organizer 1, putative					0	67.6712	71.2329	64.11	56.8306	65.14
conserved in all	PFL0225c	conserved Plasmodium protein, unknown function		nucleotide binding (GO:0000166)			0	59.1549	59.1549	43.6747	60.07	61.22
conserved in all	PFD0180c	CGI-201 protein, short form		RNA binding (GO:0003723)	spliceosome assembly (GO:0000245);RNA processing (GO:0006396)	intracellular (GO:0005622)	0	70.3846	70	68.08	54.36	41.79
conserved in all	PFL0230w	cytidine/deoxycytidylate deaminase, putative		catalytic activity (GO:0003824);zinc ion binding (GO:0008270);hydrolase activity (GO:0016787)	tRNA processing (GO:0008033)		0	49.54	49.24	45.29	54.85	55.32
conserved in all	PFC0200w-b	60S ribosomal protein L44, putative		structural constituent of ribosome (GO:0003735)	translation (GO:0006412)	intracellular (GO:0005622);ribosome (GO:0005840)	0	97.12	97.12	97.12	95.1923	97.12
conserved in all	PFL0235w	conserved Plasmodium protein, unknown function					0	77.5	76.67	80.8333	78.33	78.3333
conserved in all	MAL13P1.20	conserved Plasmodium protein, unknown function		lyase activity (GO:0016829)	metabolic process (GO:0008152)		0	77.8325	76.3547	69.46	73.7089	76.85
conserved in all	PFC0205c	1-cys-glutaredoxin-like protein-1		electron carrier activity (GO:0009055);protein disulfide oxidoreductase activity (GO:0015035);disulfide oxidoreductase activity (GO:0015036);glutathione disulfide oxidoreductase activity (GO:0015038)	cell redox homeostasis (GO:0045454)		0	67.2515	63.7427	62.5731	65.5	66.67
conserved in all	PFA0245w	transporter, putative					0	61.6838	62.6712	41.34	56.57	54.25
conserved in all	PFF0255c	conserved Plasmodium protein, unknown function		acylphosphatase activity (GO:0003998)			0	80.0948	79.6209	70.7547	73.6842	74.16
conserved in all	PFA0250w	conserved Plasmodium protein, unknown function					0	72.3	72.4832	72.92	72.2222	71.53
conserved in all	PFI0235w	replication factor A-related protein, putative		nucleic acid binding (GO:0003676)			0	87.04	83.81	47.47	73.31	85.2156
conserved in all	MAL13P1.22	DNA ligase I		magnesium ion binding (GO:0000287);DNA binding (GO:0003677);DNA ligase (ATP) activity (GO:0003910);calcium ion binding (GO:0005509);ATP binding (GO:0005524);manganese ion binding (GO:0030145)	DNA replication (GO:0006260);DNA ligation (GO:0006266);lagging strand elongation (GO:0006273);DNA repair (GO:0006281);DNA recombination (GO:0006310)	replication fork (GO:0005657);apicoplast (GO:0020011)	0	77.88	77	42.7632	60.0845	51.7822
conserved in all	PFB0240w	conserved Plasmodium protein, unknown function				nucleus (GO:0005634)	0	68.82	69.3	54.27	76.2009	75.22
conserved in all	PFL0255c	UGA suppressor tRNA-associated antigenic protein, putative					0	62.3288	65.18	51.34	57.17	45.73
conserved in all	PF10_0052	conserved Plasmodium protein, unknown function		nucleic acid binding (GO:0003676);catalytic activity (GO:0003824);ATP binding (GO:0005524);7S RNA binding (GO:0008312);metal ion binding (GO:0046872)	SRP-dependent cotranslational protein targeting to membrane (GO:0006614)	nucleus (GO:0005634);cytoplasm (GO:0005737);signal recognition particle (GO:0048500)	0	65.6535	64.8318	70.3125	68.4375	67.1875
conserved in all	PFF0265c	calcium-binding protein, putative		calcium ion binding (GO:0005509)			0	62.5	63.75	70	67.5	68.125
conserved in all	PFB0245c	DNA-directed RNA polymerase II 16 kDa subunit, putative		nucleotide binding (GO:0000166);catalytic activity (GO:0003824);DNA-directed RNA polymerase activity (GO:0003899)	transcription (GO:0006350);transcription from RNA polymerase II promoter (GO:0006366);cellular metabolic process (GO:0044237)		0	90.1515	89.3939	87.22	85.71	86.47
conserved in all	PF11_0062	histone H2B		DNA binding (GO:0003677)	nucleosome assembly (GO:0006334);chromosome organization (GO:0051276)	nucleosome (GO:0000786);nucleus (GO:0005634)	0	96.6102	96.5812	94.07	94.07	60.1626
conserved in all	PFA0265c	conserved Plasmodium protein, unknown function				membrane (GO:0016020);integral to membrane (GO:0016021)	0	43.662	46.48	45.77	50	48.5915
conserved in all	MAL13P1.23-a	CorA-like Mg2 transporter protein, putative		metal ion transmembrane transporter activity (GO:0046873)	metal ion transport (GO:0030001)	membrane (GO:0016020)	0	72.44	74.41	41.8511	62.26	64.82
conserved in all	PFD0195c	conserved Plasmodium protein, unknown function					0	62	62	55.45	51	54
conserved in all	PF14_0061	PPR repeat protein		nucleic acid binding (GO:0003676)		apicoplast (GO:0020011)	0	53.2	55.65	53.4539	57.31	45.22
conserved in all	PFB0255w-a	conserved Plasmodium protein, unknown function		nucleic acid binding (GO:0003676)			0	68.02	68.92	51.8	58.11	62.28
conserved in all	PF08_0125	tubulin gamma chain		GTPase activity (GO:0003924);structural constituent of cytoskeleton (GO:0005200);GTP binding (GO:0005525)	microtubule cytoskeleton organization (GO:0000226);microtubule-based process (GO:0007017);protein polymerization (GO:0051258)	microtubule organizing center (GO:0005815);microtubule (GO:0005874);protein complex (GO:0043234)	0	96.24	96.24	53.98	96.9027	80.6593
conserved in all	PFB0257c	conserved Plasmodium protein with pleckstrin homology domain					0	81.67	85	76.67	80.83	79.17
conserved in all	MAL8P1.142	20S proteasome beta subunit		endopeptidase activity (GO:0004175);threonine-type endopeptidase activity (GO:0004298)	proteolysis involved in cellular protein catabolic process (GO:0051603)	proteasome core complex (GO:0005839)	0	73.21	74.34	40.38	76.23	45.5224
conserved in all	PF11_0065	40S ribosomal protein S4, putative		RNA binding (GO:0003723);structural constituent of ribosome (GO:0003735)	translation (GO:0006412)	intracellular (GO:0005622);mitochondrion (GO:0005739);ribosome (GO:0005840);small ribosomal subunit (GO:0015935)	0	94.2529	94.636	76.72	91.5709	91.57
conserved in all	PF11_0066	centrin-4		calcium ion binding (GO:0005509)	mitosis (GO:0007067)	centrosome (GO:0005813)	0	75.44	74.27	67.44	67.84	67.25
conserved in all	PFE0270c	DNA repair protein, putative		damaged DNA binding (GO:0003684);ATP binding (GO:0005524);mismatched DNA binding (GO:0030983)	DNA repair (GO:0006281);mismatch repair (GO:0006298)		0	65.23	66.23	56.47	44.31	60.71
conserved in all	PF13_0022	cyclin			regulation of cyclin-dependent protein kinase activity (GO:0000079);regulation of cell cycle (GO:0051726)	viral envelope (GO:0019031)	0	75.09	73.0909	79.9242	64.39	72.92
conserved in all	PF14_0064	phosphatase, putative		hydrolase activity (GO:0016787)			0	88.66	89.1753	82.99	84.0206	84.54
conserved in all	PF13_0023	DNA-directed RNA polymerase 2, putative		DNA binding (GO:0003677);DNA-directed RNA polymerase activity (GO:0003899);protein dimerization activity (GO:0046983)	transcription (GO:0006350);transcription from RNA polymerase II promoter (GO:0006366)	DNA-directed RNA polymerase II, holoenzyme (GO:0016591)	0	79.37	77.78	79.37	77.78	78.57
specific to pfal	PFA0280w	asparagine-rich antigen Pfa35-2					0	12.1745	13.7651	5.65	11.1655	9.34853
conserved in all	PF14_0065	glideosome associated protein with multiple membrane spans 3, putative				membrane (GO:0016020);integral to membrane (GO:0016021)	0	96.831	96.48	92.96	92.61	73.52
conserved in all	PF11_0068	conserved protein, unknown function		protein binding (GO:0005515);hydrolase activity (GO:0016787)			0	85.97	86.25	63.0435	87.9447	87.94
conserved in all	PFB0275w	metabolite/drug transporter, putative					0	80.92	79.72	47.88	44.54	76.86
conserved in all	PFL0280c	conserved Plasmodium protein, unknown function					0	85.6287	84.3844	79.28	71.7201	80.7808
conserved in all	PF14_0066	radical SAM protein, putative		catalytic activity (GO:0003824);RNA methyltransferase activity (GO:0008173);iron-sulfur cluster binding (GO:0051536)	rRNA processing (GO:0006364)	cytoplasm (GO:0005737);membrane (GO:0016020)	0	77.9614	77.4105	61.6	44.81	78.18
conserved in all	PF11_0069	conserved Plasmodium protein, unknown function				membrane (GO:0016020)	0	91.73	91.73	63.16	79.7	84.21
conserved in all	PF10_0059	conserved Plasmodium membrane protein, unknown function		ATP binding (GO:0005524)	transport (GO:0006810)	integral to membrane (GO:0016021)	0	57.3913	57.83	53.7118	54.15	51.53
conserved in all	PF13_0025	conserved Plasmodium protein, unknown function				apicoplast (GO:0020011)	0	53.81	54.52	58.9623	45.7746	59.57
conserved in all	PFL0285w	targeted glyoxalase II		hydroxyacylglutathione hydrolase activity (GO:0004416);hydrolase activity (GO:0016787)	methylglyoxal metabolic process (GO:0009438)	apicoplast (GO:0020011)	0	54.1	55.18	48.6239	41.0334	58.36
conserved in all	PF10_0060	conserved Plasmodium protein, unknown function		ATP binding (GO:0005524);transferase activity (GO:0016740);hydrolase activity (GO:0016787)		cytoplasm (GO:0005737);apicoplast (GO:0020011)	0	56.94	57.7223	54.2768	55.61	45.7418
conserved in all	PFC0241w	conserved Plasmodium protein, unknown function		tRNA binding (GO:0000049);structural constituent of ribosome (GO:0003735);rRNA binding (GO:0019843)	translation (GO:0006412)	intracellular (GO:0005622);ribosome (GO:0005840)	0	83.45	83.45	54.4828	89.66	89.66
conserved in all	PFE0300c	60S ribosomal subunit protein L24-2, putative		structural constituent of ribosome (GO:0003735)	translation (GO:0006412)	intracellular (GO:0005622);ribosome (GO:0005840);large ribosomal subunit (GO:0015934)	0	68.932	68.1159	69.61	56.0976	67.9245
conserved in all	PF14_0068	fibrillarin, putative		RNA binding (GO:0003723)	rRNA processing (GO:0006364)	nucleus (GO:0005634);small nucleolar ribonucleoprotein complex (GO:0005732);mitochondrion (GO:0005739)	0	84.7507	85.8	77.3585	40.99	84.5
conserved in all	PF11_0072	apicoplast ribosomal protein S15 precursor, putative		structural constituent of ribosome (GO:0003735)	translation (GO:0006412)	intracellular (GO:0005622);ribosome (GO:0005840);apicoplast (GO:0020011)	0	61.3383	60.59	59.11	58.36	59.85
conserved in all	PF10_0062	NOT family protein, putative		transcription regulator activity (GO:0030528)	regulation of transcription (GO:0045449)	nucleus (GO:0005634)	0	61.67	62.9834	64.9425	40.8046	62.64
conserved in all	PFA0300c	vacuolar ATP synthase subunit c, putative		proton-transporting ATPase activity, rotational mechanism (GO:0046961)	ATP synthesis coupled proton transport (GO:0015986)	mitochondrial proton-transporting ATP synthase complex (GO:0005753);proton-transporting V-type ATPase, V1 domain (GO:0033180)	0	89.82	91.3838	85.12	79.1123	85.12
conserved in all	PFF0305c	ubiquitin conjugating enzyme E2, putative		small conjugating protein ligase activity (GO:0019787)	post-translational protein modification (GO:0043687);regulation of protein metabolic process (GO:0051246)		0	90.97	90.3226	70.3226	75.7764	83.23
conserved in all	PFF0315c	conserved Plasmodium protein, unknown function				cytoplasm (GO:0005737);membrane (GO:0016020)	0	55.2	57.6	50.4	40	46.4
conserved in all	PFL0295c	conserved protein, unknown function				membrane (GO:0016020);integral to membrane (GO:0016021)	0	61.07	60.92	49.35	52.35	51.06
conserved in all	PF14_0070	pre-mRNA splicing factor, putative					0	55.89	54.27	41.954	40.67	42.3
conserved in all	PFA0310c	calcium-transporting ATPase		catalytic activity (GO:0003824);calcium-transporting ATPase activity (GO:0005388);ATP binding (GO:0005524)	ATP biosynthetic process (GO:0006754);cation transport (GO:0006812);calcium ion transport (GO:0006816);metabolic process (GO:0008152)	membrane (GO:0016020);integral to membrane (GO:0016021)	0	69.66	72.63	42.02	67.6973	49.55
conserved in all	PFF0320c	polypyrimidine tract binding protein, putative		nucleic acid binding (GO:0003676);poly-pyrimidine tract binding (GO:0008187)	RNA splicing (GO:0008380)		0	57.16	54.97	51.4881	40.8955	52.13
conserved in all	PFB0290c	transcription factor, putative		nucleic acid binding (GO:0003676);transcription factor activity (GO:0003700);zinc ion binding (GO:0008270);transcription regulator activity (GO:0030528)	transcription from RNA polymerase III promoter (GO:0006383);regulation of transcription (GO:0045449)	DNA-directed RNA polymerase III complex (GO:0005666)	0	86.7925	85.85	86.7925	86.7925	61.32
conserved in all	PF10_0066	thioredoxin, putative					0	79.2746	81.35	74.6114	75.13	75.65
specific to primate	PFL0305c	IMP-specific 5'-nucleotidase, putative,haloacid dehalogenase hydrolase, putative		magnesium ion binding (GO:0000287);phosphatase activity (GO:0016791)	nucleotide metabolic process (GO:0009117)		0	84.91	84.46	9.00901	10.9589	12.84
conserved in all	PFA0315w	conserved Plasmodium protein, unknown function			rRNA processing (GO:0006364)		0	59.51	61.49	51.25	53.46	58.12
conserved in all	PF13_0028	membrane integral peptidase, M50 family, putative					0	78.4848	77.2727	49.2711	70.91	72.73
conserved in all	PFC0255c	ubiquitin conjugating enzyme E2, putative		ubiquitin-protein ligase activity (GO:0004842);small conjugating protein ligase activity (GO:0019787)	ubiquitin-dependent protein catabolic process (GO:0006511);post-translational protein modification (GO:0043687);regulation of protein metabolic process (GO:0051246)		0	92.2535	91.55	82.3944	84.51	86.62
conserved in all	PF10_0068	RNA binding protein, putative		nucleic acid binding (GO:0003676)			0	83.33	73.58	71.5447	75	75.6098
conserved in all	PF14_0074	conserved Plasmodium protein, unknown function					0	65.93	64.71	42.12	64.04	66.5
conserved in all	PF08_0120	GTPase activator, putative		ARF GTPase activator activity (GO:0008060);zinc ion binding (GO:0008270)	regulation of ARF GTPase activity (GO:0032312)		0	53.12	51.8219	53.7223	54.64	54.4355
specific to pfal	PF08_0122	conserved Plasmodium protein, unknown function					0	11.0113	11.0956	3.56	11.2168	9.8
conserved in all	PFC0262c	conserved Plasmodium protein, unknown function		ubiquinol-cytochrome-c reductase activity (GO:0008121)		cytoplasm (GO:0005737)	0	75.91	75.91	78.8321	74.1007	78.1
conserved in all	PF10_0070a	conserved Plasmodium protein, unknown function					0	85.3448	86.21	81.03	80.17	80.17
conserved in all	PFB0320c	iron-sulfur assembly protein, putative		structural molecule activity (GO:0005198);iron-sulfur cluster binding (GO:0051536)	iron-sulfur cluster assembly (GO:0016226)	mitochondrion (GO:0005739)	0	55.62	57.5	60	53.75	56.88
conserved in all	PFI0280c-a	autophagocytosis associated protein, putative					0	66.5635	67.4923	63.32	64.74	64.71
conserved in all	PF10_0071	rhoGAP GTPase, putative		Rho GTPase activator activity (GO:0005100)	signal transduction (GO:0007165);Rho protein signal transduction (GO:0007266)	intracellular (GO:0005622);membrane (GO:0016020);apicoplast (GO:0020011)	0	60.2024	60.2024	42.4242	49.33	53.2
specific to pfal	PFF0335c	probable protein, unknown function					0	10.4377	9.56376	2.89358	10.0182	13.04
conserved in all	PFC0270w	activator of Hsp90 ATPase, putative		ATPase activator activity (GO:0001671);chaperone binding (GO:0051087)		cytoplasm (GO:0005737)	0	58.74	61.52	51	60.4	45.27
conserved in all	PFF0340c	glutaredoxin-like protein, putative		electron carrier activity (GO:0009055);protein disulfide oxidoreductase activity (GO:0015035)	cell redox homeostasis (GO:0045454)		0	53.1532	54.7511	65.3	64.3836	64.3836
conserved in all	PF13_0032	conserved Plasmodium protein, unknown function		transferase activity (GO:0016740)		cytoplasm (GO:0005737);apicoplast (GO:0020011)	0	74.3215	75.9916	53.03	40.9563	70.62
conserved in all	PFC0271c	glutaredoxin 1		electron carrier activity (GO:0009055);protein disulfide oxidoreductase activity (GO:0015035);antioxidant activity (GO:0016209);class I ribonucleotide reductase activity (GO:0016959);protein-disulfide reductase (glutathione) activity (GO:0019153)	response to oxidative stress (GO:0006979);cell redox homeostasis (GO:0045454)		0	80.1802	79.28	74.77	42.3423	72.0721
conserved in all	PFA0345w-b	centrin-1		calcium ion binding (GO:0005509)			0	95.24	95.24	83.93	95.8333	88.69
conserved in all	PFE0350c	60S ribosomal protein L4, putative		RNA binding (GO:0003723);structural constituent of ribosome (GO:0003735)	translation (GO:0006412)	intracellular (GO:0005622);ribosome (GO:0005840);large ribosomal subunit (GO:0015934)	0	82.73	81.7518	79.81	58.5542	81.27
specific to pfal	PFD0260c	sequestrin		toxin binding (GO:0015643);transferase activity (GO:0016740);cell adhesion molecule binding (GO:0050839)	response to toxin (GO:0009636);cytoadherence to microvasculature, mediated by parasite protein (GO:0020035);negative regulation of cell killing (GO:0031342)	plasma membrane (GO:0005886)	0	14.1943	14.97	6.26	9.7201	10.4143
conserved in all	PF13_0033	26S proteasome regulatory subunit, putative		nucleotide binding (GO:0000166);endopeptidase activity (GO:0004175);ATP binding (GO:0005524);hydrolase activity (GO:0016787);nucleoside-triphosphatase activity (GO:0017111)	ubiquitin-dependent protein catabolic process (GO:0006511);protein catabolic process (GO:0030163)	nucleus (GO:0005634);cytoplasm (GO:0005737);proteasome regulatory particle (GO:0005838)	0	95.93	95.42	50.64	40.25	43.8
conserved in all	PFC0280c	conserved Plasmodium protein, unknown function		metal ion binding (GO:0046872)		cytoplasm (GO:0005737)	0	67.4267	68.543	55.1839	55.5184	67.76
conserved in all	PFC0281w	conserved Plasmodium protein, unknown function					0	78.8235	82.3529	49.4253	77.65	75.2941
conserved in all	PFC0282w	conserved Plasmodium protein, unknown function				membrane (GO:0016020)	0	49.1379	56.0345	45.69	40.52	45.69
specific to pfal	PFA0360c	hypothetical protein conserved in P. falciparum					0	11.9701	6.52	13.4146	12.1528	5.61343
conserved in all	PFI0300w	developmental protein, putative			protein transport (GO:0015031)		0	91.2821	90.77	87.18	64.1026	87.18
conserved in all	PFC0290w	40S ribosomal protein S23, putative		structural constituent of ribosome (GO:0003735)	translation (GO:0006412)	intracellular (GO:0005622);ribosome (GO:0005840);small ribosomal subunit (GO:0015935);cytosolic small ribosomal subunit (GO:0022627)	0	99.3103	99.3103	87.67	96.5517	98.62
conserved in all	PFD0270c	conserved Plasmodium protein, unknown function					0	49.5536	52.2321	48.2143	49.11	49.1071
conserved in all	PFC0300c	60S ribosomal protein L7, putative		structural constituent of ribosome (GO:0003735);transcription regulator activity (GO:0030528)	translation (GO:0006412)	intracellular (GO:0005622);ribosome (GO:0005840);large ribosomal subunit (GO:0015934);cytosolic large ribosomal subunit (GO:0022625)	0	82.1012	82.8794	80.16	72.37	78.99
conserved in all	PF13_0034	vacuolar ATP synthase subunit h, putative		binding (GO:0005488);hydrogen ion transporting ATP synthase activity, rotational mechanism (GO:0046933);proton-transporting ATPase activity, rotational mechanism (GO:0046961)	vacuolar acidification (GO:0007035);ATP synthesis coupled proton transport (GO:0015986)	vacuolar proton-transporting V-type ATPase, V1 domain (GO:0000221)	0	88.1838	88.1838	53.41	68.64	77.58
conserved in all	PFC0310c	ATP-dependent Clp protease proteolytic subunit		ATP-dependent peptidase activity (GO:0004176);serine-type endopeptidase activity (GO:0004252);hydrolase activity (GO:0016787)	proteolysis (GO:0006508)	nucleus (GO:0005634);endopeptidase Clp complex (GO:0009368)	0	54.03	55	50.67	54.3011	56.87
conserved in all	PF11_0087	Rad51 homolog		recombinase activity (GO:0000150);nucleotide binding (GO:0000166);DNA binding (GO:0003677);damaged DNA binding (GO:0003684);protein binding (GO:0005515);ATP binding (GO:0005524);DNA-dependent ATPase activity (GO:0008094);nucleoside-triphosphatase activity (GO:0017111)	DNA metabolic process (GO:0006259);DNA repair (GO:0006281);DNA recombination (GO:0006310)	nucleus (GO:0005634)	0	96	93.1429	86.86	94.29	64.43
conserved in all	PF11_0088	prefoldin, putative		unfolded protein binding (GO:0051082)	protein folding (GO:0006457)	cytoplasm (GO:0005737);prefoldin complex (GO:0016272)	0	76.7742	78.0645	77.42	74.84	69.18
conserved in all	MAL13P1.33	conserved Plasmodium protein, unknown function		nucleotide binding (GO:0000166);protein binding (GO:0005515);transferase activity (GO:0016740);metal ion binding (GO:0046872)	regulation of transcription, DNA-dependent (GO:0006355)	nucleus (GO:0005634);cytoplasm (GO:0005737);membrane (GO:0016020)	0	45.75	46.94	42.06	40.54	48.76
conserved in all	PFD0290w	conserved Plasmodium protein, unknown function					0	70.1923	68.27	54.37	62.5	64.4231
conserved in all	PF14_0083	40S ribosomal protein S8e, putative		structural constituent of ribosome (GO:0003735)	translation (GO:0006412)	intracellular (GO:0005622);mitochondrion (GO:0005739);cytosolic small ribosomal subunit (GO:0022627)	0	89.1403	88.69	81.1927	85.7798	87.2146
conserved in all	PFA0395w	conserved Plasmodium protein, unknown function					0	40.79	43.38	43.89	43.4389	44.34
conserved in all	PFA0400c	beta3 proteasome subunit, putative		endopeptidase activity (GO:0004175);threonine-type endopeptidase activity (GO:0004298)	ubiquitin-dependent protein catabolic process (GO:0006511);proteolysis involved in cellular protein catabolic process (GO:0051603)	proteasome core complex (GO:0005839)	0	82.3529	81.8627	80.3922	78.9216	79.4118
conserved in all	PFD0305c	vacuolar ATP synthase subunit b		hydrogen ion transporting ATP synthase activity, rotational mechanism (GO:0046933);proton-transporting ATPase activity, rotational mechanism (GO:0046961)	vacuolar acidification (GO:0007035);ATP synthesis coupled proton transport (GO:0015986);proton transport (GO:0015992);ATP metabolic process (GO:0046034)	proton-transporting two-sector ATPase complex (GO:0016469);proton-transporting V-type ATPase, V1 domain (GO:0033180)	0	97.5709	96.9636	61.4122	97.5709	97.5709
conserved in all	PFB0370c	RNA binding protein, putative					0	81.52	81.52	83.0565	58.1395	42.16
specific to pfal	PFL0360c	conserved Plasmodium protein, unknown function				cytoplasm (GO:0005737);membrane (GO:0016020)	0	8.2232	4.66226	4.08	4.66397	3.38
conserved in all	PFE0405c	longevity-assurance (LAG1) domain protein, putative				integral to membrane (GO:0016021);apicoplast (GO:0020011)	0	66.2921	66.48	64.71	53.52	58.77
conserved in all	PF13_0039	conserved Plasmodium protein, unknown function				cytoplasm (GO:0005737);apicoplast (GO:0020011)	0	53.1915	52.13	47.3118	48.913	50.54
conserved in all	PFD0311w	cytosolic glyoxalase II		hydroxyacylglutathione hydrolase activity (GO:0004416);zinc ion binding (GO:0008270);hydrolase activity (GO:0016787)	methylglyoxal metabolic process (GO:0009438)	cytosol (GO:0005829)	0	78.327	78.327	74.5247	60.9848	70.85
conserved in all	PF13_0040	DNA-directed RNA polymerase alpha chain, putative		DNA binding (GO:0003677);DNA-directed RNA polymerase activity (GO:0003899);protein dimerization activity (GO:0046983)	transcription (GO:0006350)	apicoplast (GO:0020011)	0	71.13	70.76	62.2	54.1063	47.97
conserved in all	PFE0410w	triose phosphate transporter		glucose 6-phosphate:phosphate antiporter activity (GO:0008524);triose-phosphate:phosphate antiporter activity (GO:0009670)	glucose import (GO:0046323)	membrane (GO:0016020);apicoplast (GO:0020011);integral to plastid outer membrane (GO:0031355)	0	73.913	73.913	65.6977	70.35	70.35
specific to primate	MAL7P1.339	Ca chelating serine protease, putative				extracellular region (GO:0005576)	0	46.11	53.0726	5.35211	6.65702	14.55
conserved in all	PFF0405c	conserved Plasmodium protein, unknown function					0	59.24	62.18	68.55	67.92	43.4
conserved in all	MAL7P1.340	ATP synthase subunit C, putative		hydrogen ion transmembrane transporter activity (GO:0015078);hydrogen ion transporting ATP synthase activity, rotational mechanism (GO:0046933);proton-transporting ATPase activity, rotational mechanism (GO:0046961)	ATP synthesis coupled proton transport (GO:0015986)	membrane (GO:0016020);proton-transporting two-sector ATPase complex (GO:0016469);proton-transporting ATP synthase complex, coupling factor F(o) (GO:0045263)	0	78.92	79.6407	72.46	66.47	71.26
conserved in all	PF10_0081	26S proteasome regulatory subunit 4, putative		nucleotide binding (GO:0000166);endopeptidase activity (GO:0004175);ATP binding (GO:0005524);hydrolase activity (GO:0016787);nucleoside-triphosphatase activity (GO:0017111)	proteolysis (GO:0006508);protein catabolic process (GO:0030163)	nucleus (GO:0005634);cytoplasm (GO:0005737);proteasome regulatory particle (GO:0005838)	0	95.3229	95.1002	44.2	61.69	70.4194
conserved in all	PFL0375w	conserved Plasmodium protein, unknown function		nucleotide binding (GO:0000166);nucleic acid binding (GO:0003676);RNA binding (GO:0003723)	mRNA processing (GO:0006397)	nucleus (GO:0005634);cytoplasm (GO:0005737);apicoplast (GO:0020011)	0	70.33	73.7705	64.2857	65.93	70.33
conserved in all	PFF0420c	proteasome subunit alpha type 2, putative		endopeptidase activity (GO:0004175);threonine-type endopeptidase activity (GO:0004298)	ubiquitin-dependent protein catabolic process (GO:0006511);proteolysis involved in cellular protein catabolic process (GO:0051603)	proteasome core complex (GO:0005839)	0	93.1915	92.77	91.9149	91.49	91.0638
specific to pfal	PFD0320c	conserved Plasmodium protein, unknown function		motor activity (GO:0003774);actin binding (GO:0003779);calmodulin binding (GO:0005516);ATP binding (GO:0005524)		cytoplasm (GO:0005737);myosin complex (GO:0016459)	0	8.4549	8.72283	5.44157	6.4	6.36337
conserved in all	PFL0385c	blood stage antigen 41-3 precursor					0	69.3333	69.87	60.3723	66.1333	64.53
conserved in all	PF14_0088	aldo-keto reductase, putative		oxidoreductase activity (GO:0016491)	oxidation reduction (GO:0055114)	apicoplast (GO:0020011)	0	56.81	56.84	40.3133	41.21	45.06
conserved in all	PFD0335c	conserved Plasmodium protein, unknown function		RNA binding (GO:0003723);structural constituent of ribosome (GO:0003735);5S rRNA binding (GO:0008097)	translation (GO:0006412)	intracellular (GO:0005622);ribosome (GO:0005840)	0	76.92	75.8741	59.0909	69.9301	74.83
conserved in all	PFC0350c	TCP-1/cpn60 chaperonin family, putative		protein binding (GO:0005515);ATP binding (GO:0005524);unfolded protein binding (GO:0051082)	protein folding (GO:0006457);cellular protein metabolic process (GO:0044267)	chaperonin-containing T-complex (GO:0005832)	0	90	89.4444	91.09	52.32	91.28
conserved in all	PFA0435w	conserved Plasmodium protein, unknown function		transporter activity (GO:0005215);binding (GO:0005488)	transport (GO:0006810)	mitochondrion (GO:0005739);mitochondrial inner membrane (GO:0005743);membrane (GO:0016020);integral to membrane (GO:0016021)	0	71.39	71.1172	51.9444	62.5	50.56
conserved in all	PF10_0084	tubulin beta chain		GTPase activity (GO:0003924);structural molecule activity (GO:0005198);structural constituent of cytoskeleton (GO:0005200);GTP binding (GO:0005525)	microtubule cytoskeleton organization (GO:0000226);microtubule-based process (GO:0007017);microtubule-based movement (GO:0007018);protein polymerization (GO:0051258)	microtubule (GO:0005874);protein complex (GO:0043234)	0	99.5506	99.33	44.2697	77.7528	99.5506
conserved in all	MAL7P1.320	ribosomal protein, L37e, putative		structural constituent of ribosome (GO:0003735)	translation (GO:0006412)	intracellular (GO:0005622);ribosome (GO:0005840)	0	96.74	95.6522	95.65	94.57	93.48
conserved in all	PFF0435w	ornithine aminotransferase		ornithine-oxo-acid transaminase activity (GO:0004587);transaminase activity (GO:0008483);pyridoxal phosphate binding (GO:0030170)	ornithine metabolic process (GO:0006591)		0	91.0628	91.3043	85.27	82.85	85.75
conserved in all	PF14_0090	DNA-damage inducible protein, putative		aspartic-type endopeptidase activity (GO:0004190)	proteolysis (GO:0006508)		0	71.2	70.4835	67.54	67.7749	47.7041
conserved in all	PFA0440w	photosensitized INA-labeled protein 1, PhIL1, putative					0	53.95	55.51	54.9107	56.7	55.3571
conserved in all	PF14_0092	conserved Plasmodium membrane protein, unknown function				integral to membrane (GO:0016021)	0	94.2748	93.5115	90.08	90.46	77.27
conserved in all	PFC0360w	activator of Hsp90 ATPase, putative			response to stress (GO:0006950)		0	78.5714	77.86	65.7143	80	79.29
conserved in all	PF11_0097	succinyl-CoA synthetase alpha subunit, putative		catalytic activity (GO:0003824);succinate-CoA ligase (GDP-forming) activity (GO:0004776);binding (GO:0005488)	tricarboxylic acid cycle (GO:0006099);succinyl-CoA metabolic process (GO:0006104);metabolic process (GO:0008152)	mitochondrion (GO:0005739);mitochondrial matrix (GO:0005759);membrane (GO:0016020);succinate-CoA ligase complex (GDP-forming) (GO:0045244)	0	82.9268	83.792	44.04	81.46	70.66
conserved in all	PF11_0098	endoplasmic reticulum-resident calcium binding protein		calcium ion binding (GO:0005509)	intracellular protein transport (GO:0006886)	endoplasmic reticulum (GO:0005783)	0	71.97	72.8324	48.69	63.3721	53.14
conserved in all	PFC0365w	PRP19-like protein, putative		ubiquitin-protein ligase activity (GO:0004842)	protein ubiquitination (GO:0016567)	ubiquitin ligase complex (GO:0000151);nuclear matrix (GO:0016363)	0	66.3534	69.74	43.0285	70.92	73.9212
conserved in all	PFI0385c	P1 nuclease, putative		hydrolase activity, acting on ester bonds (GO:0016788)			0	59.38	56.83	48.9311	55.4	54.2
conserved in all	PFD0355c	peptidyl-tRNA hydrolase PTH2, putative		aminoacyl-tRNA hydrolase activity (GO:0004045)	translation (GO:0006412)		0	67.2	68.23	53.44	67.37	66.15
conserved in all	PF10_0087	diphthine synthase		diphthine synthase activity (GO:0004164);methyltransferase activity (GO:0008168)	metabolic process (GO:0008152);peptidyl-diphthamide biosynthetic process from peptidyl-histidine (GO:0017183)		0	75.55	76.6423	77.3723	43.86	78.1022
conserved in all	PF13_0045	40S ribosomal protein S27, putative		structural constituent of ribosome (GO:0003735)	translation (GO:0006412)	intracellular (GO:0005622);ribosome (GO:0005840);cytosolic small ribosomal subunit (GO:0022627)	0	95.122	95.122	70.7317	96.3415	96.3415
conserved in all	MAL8P1.131	gas41 homologue, putative		transcription factor activity (GO:0003700)	regulation of transcription, DNA-dependent (GO:0006355)	nucleus (GO:0005634)	0	73.8739	77.5229	80.73	75.69	72.29
conserved in all	PFC0371w	conserved protein, unknown function		ATP binding (GO:0005524)		cytoplasm (GO:0005737)	0	75.2294	79.63	81.4815	81.4815	80.56
conserved in all	PFA0465c	N-acetyltransferase, putative		N-acetyltransferase activity (GO:0008080)	N-terminal protein amino acid acetylation (GO:0006474);metabolic process (GO:0008152)		0	80.5031	78.6164	81.2903	80	79.3548
conserved in all	PF11_0101	conserved Plasmodium protein, unknown function		binding (GO:0005488)		cytoplasm (GO:0005737)	0	44.7312	46.1373	50.43	43.1965	54.51
conserved in all	PFA0475c	conserved protein, unknown function					0	51.94	53.88	60.29	60.29	45.15
conserved in all	PF10_0091	zinc finger protein, putative		zinc ion binding (GO:0008270)		intracellular (GO:0005622)	0	52.17	53.4392	51.65	52.47	46.1749
conserved in all	PF08_0110	Rab GTPase 18		GTPase activity (GO:0003924);protein binding (GO:0005515);GTP binding (GO:0005525)	intracellular protein transport (GO:0006886);nucleocytoplasmic transport (GO:0006913);signal transduction (GO:0007165);small GTPase mediated signal transduction (GO:0007264);protein transport (GO:0015031);regulation of vesicle-mediated transport (GO:0060627)	intracellular (GO:0005622);membrane (GO:0016020)	0	97.5124	97.0149	89.604	97.0149	96.52
conserved in all	PFC0381c	conserved Plasmodium protein, unknown function				cytoplasm (GO:0005737)	0	53.5912	55.25	40.45	41.573	55.25
conserved in all	MAL8P1.128	proteasome subunit alpha, putative		endopeptidase activity (GO:0004175);threonine-type endopeptidase activity (GO:0004298)	ubiquitin-dependent protein catabolic process (GO:0006511);proteolysis involved in cellular protein catabolic process (GO:0051603)	proteasome core complex (GO:0005839)	0	90.3846	89.2308	61.07	88.51	89.62
conserved in all	PFB0423c	conserved protein, unknown function				nucleus (GO:0005634)	0	65.71	65.7143	56.7	41.85	53.39
conserved in all	PF14_0098	tetratricopeptide repeat family protein, putative					0	64.1638	64.1638	58.5	58.11	58.84
conserved in all	PFC0395w	asparagine synthetase, putative		asparagine synthase (glutamine-hydrolyzing) activity (GO:0004066)	asparagine biosynthetic process (GO:0006529);metabolic process (GO:0008152)		0	76.9106	77.0732	75.5738	53.93	68.85
conserved in all	PF08_0109	proteasome subunit alpha type 5, putative					0	58.1213	59.04	54.94	42.83	54.24
conserved in all	PFL0430w	tim10 homologue, putative		P-P-bond-hydrolysis-driven protein transmembrane transporter activity (GO:0015450)	protein targeting to mitochondrion (GO:0006626);protein transport (GO:0015031);protein import into mitochondrial inner membrane (GO:0045039)	mitochondrial inner membrane presequence translocase complex (GO:0005744);mitochondrial intermembrane space protein transporter complex (GO:0042719)	0	92	89.3333	81.3333	84	81.3333
conserved in all	PFI0420c	tRNA pseudouridine synthase, putative		RNA binding (GO:0003723);pseudouridine synthase activity (GO:0009982)	pseudouridine synthesis (GO:0001522);RNA modification (GO:0009451)		0	56.41	57.3718	56.4103	62.66	56.33
conserved in all	PF10_0097	mitochondrial ribosomal protein L22/L43, putative					0	84.04	82.63	56.81	63.72	86.8545
conserved in all	MAL8P1.125	tyrosyl-tRNA synthetase, putative		nucleotide binding (GO:0000166);aminoacyl-tRNA ligase activity (GO:0004812);tyrosine-tRNA ligase activity (GO:0004831);ATP binding (GO:0005524)	translation (GO:0006412);tRNA aminoacylation for protein translation (GO:0006418);tyrosyl-tRNA aminoacylation (GO:0006437)	cytoplasm (GO:0005737)	0	80.53	82.31	75.3351	81.7694	81.7694
conserved in all	PFB0445c	DEAD box helicase		nucleic acid binding (GO:0003676);RNA binding (GO:0003723);ATP-dependent RNA helicase activity (GO:0004004);helicase activity (GO:0004386);ATP binding (GO:0005524);ATP-dependent helicase activity (GO:0008026)		nucleus (GO:0005634);cytoplasm (GO:0005737)	0	91.1205	91.3136	66.74	82.4034	63.03
conserved in all	PFC0400w	60S acidic ribosomal protein P2, putative		structural constituent of ribosome (GO:0003735)	translational elongation (GO:0006414)	intracellular (GO:0005622);ribosome (GO:0005840);large ribosomal subunit (GO:0015934);cytosolic large ribosomal subunit (GO:0022625)	0	75.8929	74.11	75	77.68	75
conserved in all	PFI0425w	transporter, putative		binding (GO:0005488)	transport (GO:0006810)	mitochondrial inner membrane (GO:0005743);membrane (GO:0016020)	0	50.76	52.11	45.76	44.84	52.6
conserved in all	PFB0450w	secretory complex protein 61 gamma subunit		protein binding (GO:0005515);protein transporter activity (GO:0008565);P-P-bond-hydrolysis-driven protein transmembrane transporter activity (GO:0015450)	protein targeting (GO:0006605);intracellular protein transport (GO:0006886);protein transport (GO:0015031);protein transport by the Sec complex (GO:0043952)	Sec61 translocon complex (GO:0005784);endoplasmic reticulum membrane (GO:0005789);membrane (GO:0016020)	0	85.37	84.15	75.9036	77.11	77.11
conserved in all	PFC0410w	YT521-B-like family protein, putative					0	60.14	62.77	53.93	64.64	66.07
conserved in all	PF11_0109	conserved Plasmodium protein, unknown function		nucleic acid binding (GO:0003676)	rRNA processing (GO:0006364);ribosome biogenesis (GO:0042254)	intracellular (GO:0005622);nucleus (GO:0005634)	0	45.64	45.02	50	49.55	51.34
specific to pfal	PFF0475w	hypothetical protein					0	8.02213	8.33042	10.8022	9.79	13.6
conserved in all	PFB0455w-b	60S ribosomal protein L37ae, putative		structural constituent of ribosome (GO:0003735)	translation (GO:0006412)	intracellular (GO:0005622);ribosome (GO:0005840)	0	96.88	96.88	95.8333	95.8333	95.83
conserved in all	PF07_0026	ubiquitin-protein ligase e3, putative		ubiquitin-protein ligase activity (GO:0004842)	protein ubiquitination (GO:0016567)	ubiquitin ligase complex (GO:0000151)	0	40.06	40.23	43.33	42.3	41.06
conserved in all	PFA0520c	chromatin assembly factor 1 protein WD40 domain, putative		histone binding (GO:0042393);unfolded protein binding (GO:0051082)	nucleosome assembly (GO:0006334)	chromatin assembly complex (GO:0005678)	0	78.3	81.4318	78.67	79.1111	78.46
conserved in all	PFE0490w	conserved Plasmodium protein, unknown function		protein binding (GO:0005515)			0	55.03	56.43	54.4118	44.4099	46.7456
conserved in all	PF13_0049	60S ribosomal protein L24, putative		structural constituent of ribosome (GO:0003735)	translation (GO:0006412)	intracellular (GO:0005622);ribosome (GO:0005840);cytosolic large ribosomal subunit (GO:0022625)	0	90.7407	90.1235	68.48	87.12	72.22
conserved in all	PFA0525w	transcription initiation factor TFIIB, putative		RNA polymerase II transcription factor activity (GO:0003702);translation initiation factor activity (GO:0003743);protein binding (GO:0005515);zinc ion binding (GO:0008270);transcription regulator activity (GO:0030528)	transcription initiation (GO:0006352);regulation of transcription, DNA-dependent (GO:0006355);transcription initiation from RNA polymerase II promoter (GO:0006367);translational initiation (GO:0006413);regulation of transcription (GO:0045449)	nucleus (GO:0005634);transcription factor complex (GO:0005667)	0	80.71	81.5217	67.85	81.47	79.84
conserved in all	PFL0450c	conserved Plasmodium protein, unknown function					0	52.33	50.2793	44.9102	55.0898	53.8922
conserved in all	PFA0530c	adenylate kinase, putative					0	60.5128	61.03	60.91	60.8911	61.39
conserved in all	PFF0485c	zinc finger protein, putative		nucleic acid binding (GO:0003676);zinc ion binding (GO:0008270)		integral to membrane (GO:0016021)	0	88.3803	88.03	83.2215	87.68	87.68
conserved in all	MAL8P1.122	ubiquitin regulatory protein, putative					0	72.2	72.2	50	69.83	46.5
conserved in all	MAL7P1.24	large ribosomal subunit processing protein, putative				intracellular (GO:0005622)	0	88.8031	89.58	54.0541	73.4615	89.58
conserved in all	PF10_0104	dolichyl-phosphate-mannose protein mannosyltransferase, putative		mannosyltransferase activity (GO:0000030);dolichyl-phosphate-mannose-protein mannosyltransferase activity (GO:0004169)	protein amino acid O-linked glycosylation (GO:0006493)	endoplasmic reticulum (GO:0005783);endoplasmic reticulum membrane (GO:0005789);membrane (GO:0016020);integral to membrane (GO:0016021)	0	73.2143	72.65	44.89	68.89	70.22
conserved in all	PFB0465c	monocarboxylate transporter, putative		monocarboxylic acid transmembrane transporter activity (GO:0008028)	monocarboxylic acid transport (GO:0015718)	membrane (GO:0016020)	0	80.57	79.9127	48.49	65.65	85.34
conserved in all	PF14_0103	conserved Plasmodium protein, unknown function				cytoplasm (GO:0005737)	0	45.1128	46.27	44.12	43.28	43.28
conserved in all	PFD0430c	perforin like protein 1				apicoplast (GO:0020011)	0	55.3864	53.8915	51.72	52.6005	55.99
conserved in all	MAL13P1.44	protein phosphatase 2c-like protein, putative		catalytic activity (GO:0003824);protein serine/threonine phosphatase activity (GO:0004722)	protein amino acid phosphorylation (GO:0006468)	protein serine/threonine phosphatase complex (GO:0008287)	0	59.13	57.6651	51.39	50.54	44.0821
conserved in all	PF10_0105	ribosomal protein, putative		structural constituent of ribosome (GO:0003735)	translation (GO:0006412)	intracellular (GO:0005622);ribosome (GO:0005840)	0	73.24	71.95	77.15	76.49	76.49
conserved in all	PF11_0113	mitochondrial ribosomal protein L11 precursor, putative		structural constituent of ribosome (GO:0003735)	translation (GO:0006412)	organellar large ribosomal subunit (GO:0000315);intracellular (GO:0005622);ribosome (GO:0005840)	0	91.573	92.1348	86.52	86.52	86.52
conserved in all	PF07_0027	DNA-directed RNA polymerase 2 8.2 kDa polypeptide, putative		DNA-directed RNA polymerase activity (GO:0003899)	transcription (GO:0006350);transcription from RNA polymerase II promoter (GO:0006366)	DNA-directed RNA polymerase II, core complex (GO:0005665)	0	94.2029	94.2029	91.3043	91.3043	91.3043
conserved in all	PF11_0114a	conserved Plasmodium protein, unknown function					0	54.5455	52.66	53.96	54.9	59.7
conserved in all	PF14_0105	conserved Plasmodium protein, unknown function				apicoplast (GO:0020011)	0	75.5102	75.15	73.3918	71.0526	73.98
conserved in all	PFA0540c	conserved Plasmodium protein, unknown function		acetate-CoA ligase activity (GO:0003987);AMP binding (GO:0016208)	metabolic process (GO:0008152)		0	56.76	69.07	76.29	79.3814	78.35
conserved in all	PFB0475c	conserved Plasmodium protein, unknown function					0	79.15	79.6	55.61	73.5	58.04
conserved in all	PFF0495w	mitochondrial ribosomal protein L19 precursor, putative		structural constituent of ribosome (GO:0003735)	translation (GO:0006412)	intracellular (GO:0005622);ribosome (GO:0005840)	0	83.5962	85.5346	64.35	46.08	84.49
specific to pfal	PF08_0107	erythrocyte membrane protein 1, PfEMP1		receptor activity (GO:0004872);cell adhesion molecule binding (GO:0050839)	pathogenesis (GO:0009405);cell-cell adhesion (GO:0016337);rosetting (GO:0020013);antigenic variation (GO:0020033);cytoadherence to microvasculature, mediated by parasite protein (GO:0020035)	integral to membrane (GO:0016021);host cell plasma membrane (GO:0020002);infected host cell surface knob (GO:0020030)	0	8.43267	8.92	2.43	7.24	6.09
conserved in all	MAL7P1.26	O-sialoglycoprotein endopeptidase, putative		protein kinase activity (GO:0004672);ATP binding (GO:0005524);O-sialoglycoprotein endopeptidase activity (GO:0008450)	protein amino acid phosphorylation (GO:0006468);O-sialoglycoprotein catabolic process (GO:0045173)	apicoplast (GO:0020011)	0	70.9402	72.6496	72.65	72.65	72.65
conserved in all	PF11_0117	replication factor C subunit 5, putative			DNA replication (GO:0006260);DNA strand elongation involved in DNA replication (GO:0006271)	DNA replication factor C complex (GO:0005663)	0	86.82	84.8138	64.6617	83.67	83.95
absent in pkno	PF07_0029	heat shock protein 90		ATP binding (GO:0005524);unfolded protein binding (GO:0051082)	protein folding (GO:0006457);response to stress (GO:0006950);response to unfolded protein (GO:0006986);response to heat (GO:0009408)		0	93.46	89.008	46.0403	57.72	72.1
conserved in all	PFE0505w	cyclophilin, putative		peptidyl-prolyl cis-trans isomerase activity (GO:0003755);cyclosporin A binding (GO:0016018)	protein folding (GO:0006457)		0	66.9302	67.6	60	64.8684	55.47
conserved in all	PFE0510c	conserved Plasmodium protein, unknown function				cytoplasm (GO:0005737)	0	68.15	70.1613	56.1	62.753	63.56
conserved in all	PFA0555c	UMP-CMP kinase, putative		uridine kinase activity (GO:0004849);ATP binding (GO:0005524)	nucleobase, nucleoside, nucleotide and nucleic acid metabolic process (GO:0006139);pyrimidine nucleotide biosynthetic process (GO:0006221)	apicoplast (GO:0020011)	0	60.32	60.86	57.4124	59.57	60.11
conserved in all	PF10_0111	20S proteasome beta subunit, putative		endopeptidase activity (GO:0004175);threonine-type endopeptidase activity (GO:0004298)	ubiquitin-dependent protein catabolic process (GO:0006511);proteolysis involved in cellular protein catabolic process (GO:0051603)	proteasome core complex (GO:0005839)	0	87.32	88.93	69.3727	87.8229	67.16
conserved in all	PFD0450c	pre-mRNA splicing factor, putative			RNA splicing, via transesterification reactions (GO:0000375);RNA splicing (GO:0008380)	spliceosomal complex (GO:0005681)	0	68.6347	69.3161	41.3858	57.3832	69.1
specific to pfal	PF08_0106	erythrocyte membrane protein 1, PfEMP1		receptor activity (GO:0004872);cell adhesion molecule binding (GO:0050839)	pathogenesis (GO:0009405);cell-cell adhesion (GO:0016337);rosetting (GO:0020013);antigenic variation (GO:0020033);cytoadherence to microvasculature, mediated by parasite protein (GO:0020035)	integral to membrane (GO:0016021);host cell plasma membrane (GO:0020002);infected host cell surface knob (GO:0020030)	0	9.45341	10.89	5.24	7.35	5.87181
conserved in all	PFF0510w	histone H3		DNA binding (GO:0003677)	chromatin assembly or disassembly (GO:0006333);nucleosome assembly (GO:0006334);chromosome organization (GO:0051276)	nucleosome (GO:0000786);nucleus (GO:0005634)	0	100	99.2647	49.64	50	100
conserved in all	PFI0475w	small nuclear ribonucleoprotein (snRNP), putative					0	90.52	87.07	65.52	91.38	92.24
conserved in all	PFD0455w	40S ribosomal processing protein, putative			rRNA modification (GO:0000154)	small nucleolar ribonucleoprotein complex (GO:0005732)	0	74.69	76.971	62.3722	77.9141	43.82
conserved in all	PF07_0032	Cg8 protein					0	75.22	76.09	51.75	75	75.4386
conserved in all	MAL13P1.47	mitochondrial ATP synthase delta subunit, putative		hydrogen ion transporting ATP synthase activity, rotational mechanism (GO:0046933);proton-transporting ATPase activity, rotational mechanism (GO:0046961)	hydrogen transport (GO:0006818);ATP synthesis coupled proton transport (GO:0015986)	mitochondrion (GO:0005739);mitochondrial proton-transporting ATP synthase, catalytic core (GO:0005754);proton-transporting ATP synthase complex, catalytic core F(1) (GO:0045261)	0	58.27	58.6614	57.9151	58.69	58.69
conserved in all	PFA0575c	conserved Plasmodium protein, unknown function				cytoplasm (GO:0005737)	0	80.25	80.25	71.6049	71.6049	70.37
specific to pfal	PF08_0105	rifin			antigenic variation (GO:0020033)	membrane (GO:0016020);host cell plasma membrane (GO:0020002)	0	0	5.2774	12.6289	9.2233	5.51664
specific to primate	PFC0440c	DEAD box helicase, putative		nucleic acid binding (GO:0003676);helicase activity (GO:0004386);ATP binding (GO:0005524)			0	40.76	42.25	8.63278	8.23426	5.19366
conserved in all	PFA0580c	TatD-like deoxyribonuclease, putative		deoxyribonuclease activity (GO:0004536);endodeoxyribonuclease activity, producing 5'-phosphomonoesters (GO:0016888)	DNA metabolic process (GO:0006259)	apicoplast (GO:0020011)	0	63.36	62.8635	47.2477	63.4921	48.16
conserved in all	MAL13P1.49	conserved Plasmodium protein, unknown function				membrane (GO:0016020);integral to membrane (GO:0016021);apicoplast (GO:0020011)	0	56.1644	52.7397	51.7241	48.61	49.31
specific to pfal	PF08_0104	rifin			antigenic variation (GO:0020033)	membrane (GO:0016020);host cell plasma membrane (GO:0020002)	0	2.05854	2.27723	12.1951	5.88235	7.67386
conserved in all	PF10_0115	QF122 antigen		RNA binding (GO:0003723)			0	50.4795	50.31	45.3029	50.2618	46.78
specific to pfal	PF08_0103	erythrocyte membrane protein 1, PfEMP1		receptor activity (GO:0004872);cell adhesion molecule binding (GO:0050839)	pathogenesis (GO:0009405);cell-cell adhesion (GO:0016337);rosetting (GO:0020013);antigenic variation (GO:0020033);cytoadherence to microvasculature, mediated by parasite protein (GO:0020035)	integral to membrane (GO:0016021);host cell plasma membrane (GO:0020002);infected host cell surface knob (GO:0020030)	0	8.38863	9	4.17	3.98293	5.83215
conserved in all	PFE0540w	WD-repeat protein, putative		protein binding (GO:0005515)			0	77.61	77.74	48.4791	54.46	66.29
conserved in all	PFD0480w	conserved Plasmodium protein, unknown function		translation release factor activity, codon specific (GO:0016149)	translation (GO:0006412);translational termination (GO:0006415)	cytoplasm (GO:0005737);apicoplast (GO:0020011)	0	51.7766	50.5102	52.82	51.02	46.89
conserved in all	PFF0545c	conserved Plasmodium protein, unknown function					0	78.41	83.13	78.82	79.5455	81.93
conserved in all	MAL13P1.51	secretory complex protein 61 alpha,Rab GTPase 5b		protein binding (GO:0005515);GTP binding (GO:0005525)	small GTPase mediated signal transduction (GO:0007264);protein transport (GO:0015031);protein transport by the Sec complex (GO:0043952);regulation of vesicle-mediated transport (GO:0060627)	intracellular (GO:0005622);Sec61 translocon complex (GO:0005784);endoplasmic reticulum membrane (GO:0005789);membrane (GO:0016020)	0	91.79	90.3382	61.3527	65.92	71.01
conserved in all	PFE0545c	translationally controlled tumor protein homolog, putative				cytoplasm (GO:0005737)	0	85.9649	85.9649	90.06	58.14	88.89
conserved in all	PFB0515w	dolichol-linked oligosaccharide biosynthesis enzyme, putative				membrane (GO:0016020)	0	60.29	62.86	55.02	55.02	58.3732
conserved in all	PF13_0058	conserved Plasmodium protein, unknown function		nucleic acid binding (GO:0003676)			0	61.88	59.4937	52.87	54.4304	55.414
conserved in all	PFD0487c	actin-like protein, putative		structural constituent of cytoskeleton (GO:0005200);protein binding (GO:0005515)	cytoskeleton organization (GO:0007010)	actin cytoskeleton (GO:0015629)	0	59.1017	59.1017	65	64.52	57.55
conserved in all	PFE0550w	conserved Plasmodium protein, unknown function					0	63.11	61.3636	53.66	54.4715	56.1
conserved in all	PF11_0128	coq4 homolog, putative			ubiquinone biosynthetic process (GO:0006744)		0	76.62	77.75	74.3662	57.423	74.93
conserved in all	PFF0555w	conserved Plasmodium protein, unknown function					0	87.1429	86.7857	52.5	58.8	85.36
conserved in all	PF10_0120	ubiquinol-cytochrome c reductase complex subunit, putative		ubiquinol-cytochrome-c reductase activity (GO:0008121)	mitochondrial electron transport, ubiquinol to cytochrome c (GO:0006122)	mitochondrion (GO:0005739)	0	84.46	82.9016	61.4583	85.42	84.9
conserved in all	PF14_0114	GTP binding protein, putative		nucleotide binding (GO:0000166);GTP binding (GO:0005525)		intracellular (GO:0005622);mitochondrion (GO:0005739);apicoplast (GO:0020011)	0	47.71	49.3233	51.1111	53.8095	44.4444
conserved in all	PFE0555w	stearoyl-CoA delta 9 desaturase, putative		stearoyl-CoA 9-desaturase activity (GO:0004768);oxidoreductase activity (GO:0016491)	lipid metabolic process (GO:0006629);fatty acid biosynthetic process (GO:0006633);oxidation reduction (GO:0055114)	apicoplast (GO:0020011)	0	72.82	72.3205	53.5639	63.2309	70.38
conserved in all	PFB0525w	asparagine-tRNA ligase, putative		nucleotide binding (GO:0000166);nucleic acid binding (GO:0003676);aminoacyl-tRNA ligase activity (GO:0004812);aspartate-tRNA ligase activity (GO:0004815);asparagine-tRNA ligase activity (GO:0004816);ATP binding (GO:0005524)	translation (GO:0006412);tRNA aminoacylation for protein translation (GO:0006418);asparaginyl-tRNA aminoacylation (GO:0006421);aspartyl-tRNA aminoacylation (GO:0006422)	cytoplasm (GO:0005737)	0	75.08	75.5738	61.9672	56.3107	69.3944
specific to primate	PFE0560c	MORN repeat protein, putative				apicoplast (GO:0020011)	0	41.78	41.97	8.1	13.3985	5.77872
conserved in all	PF10_0121	hypoxanthine phosphoribosyltransferase		hypoxanthine phosphoribosyltransferase activity (GO:0004422)	purine ribonucleoside salvage (GO:0006166);nucleoside metabolic process (GO:0009116)	cytoplasm (GO:0005737)	0	78.5408	77.6824	67.1	67.53	67.97
conserved in all	PF13_0059	mitochondrial ribosomal protein S15 precursor, putative		structural constituent of ribosome (GO:0003735)	translation (GO:0006412)	intracellular (GO:0005622);ribosome (GO:0005840)	0	82.51	82.18	47.8548	81.8482	46.732
conserved in all	MAL13P1.53	conserved Plasmodium protein, unknown function					0	66.2921	62.9213	75.8621	63.2184	75.86
conserved in all	PFB0535w	GDP-fructose:GMP antiporter, putative					0	62.7	61.0932	44.37	55.63	67.31
conserved in all	PF14_0117	conserved Plasmodium protein, unknown function		nucleic acid binding (GO:0003676);endonuclease activity (GO:0004519);zinc ion binding (GO:0008270)	DNA catabolic process (GO:0006308)	extracellular region (GO:0005576)	0	59.94	59.34	53.66	53.3333	51.82
conserved in all	PF14_0119	p1/s1 nuclease, putative		nuclease activity (GO:0004518)			0	51.56	52.8	42.3313	42.17	42.7711
conserved in all	PF13_0061	ATP synthase gamma chain, mitochondrial precursor, putative		hydrogen ion transporting ATP synthase activity, rotational mechanism (GO:0046933);proton-transporting ATPase activity, rotational mechanism (GO:0046961)	hydrogen transport (GO:0006818);ATP synthesis coupled proton transport (GO:0015986)	mitochondrion (GO:0005739);mitochondrial proton-transporting ATP synthase, catalytic core (GO:0005754);proton-transporting ATP synthase complex, catalytic core F(1) (GO:0045261)	0	79.42	78.46	76.5273	75.2412	77.17
conserved in all	PFD0525w	conserved Plasmodium protein, unknown function		binding (GO:0005488)	regulation of translation (GO:0006417)	cytoplasm (GO:0005737);cytoskeleton (GO:0005856)	0	83.44	85.28	80.0613	75.46	78.8344
absent in pkno	PF11_0134	conserved Plasmodium protein, unknown function					0	51.99	6.7557	17.04	51.9	48.8
conserved in all	PF13_0062	clathrin-adaptor medium chain, putative		protein binding (GO:0005515)	transport (GO:0006810);intracellular protein transport (GO:0006886);vesicle-mediated transport (GO:0016192)	clathrin vesicle coat (GO:0030125);clathrin adaptor complex (GO:0030131)	0	89.52	90.393	81.0924	88.8889	65.95
conserved in all	PFF0573c	60S ribosomal protein L39, putative		structural constituent of ribosome (GO:0003735)	translation (GO:0006412)	intracellular (GO:0005622);ribosome (GO:0005840)	0	88.24	86.2745	88.24	86.27	90.2
conserved in all	PF13_0063	26S proteasome regulatory subunit 7, putative		nucleotide binding (GO:0000166);endopeptidase activity (GO:0004175);ATP binding (GO:0005524);hydrolase activity (GO:0016787);nucleoside-triphosphatase activity (GO:0017111)	ubiquitin-dependent protein catabolic process (GO:0006511);protein catabolic process (GO:0030163)	nucleus (GO:0005634);cytoplasm (GO:0005737);proteasome regulatory particle (GO:0005838)	0	96.9048	93.32	66.67	97.1429	46.74
conserved in all	PFL0550w	HSP20-like chaperone					0	56.9038	57.63	63.68	64.1026	65.81
conserved in all	PF14_0122	nuclear transport factor 2, putative			protein import into nucleus (GO:0006606);transport (GO:0006810)	intracellular (GO:0005622)	0	96.8	95.2	44	95.2	94.4
conserved in all	MAL7P1.29a	conserved Plasmodium protein, unknown function					0	65.7143	73.85	69.23	67.69	66.1538
conserved in all	PFB0550w	peptide chain release factor subunit 1, putative		translation release factor activity (GO:0003747);translation release factor activity, codon specific (GO:0016149)	translational termination (GO:0006415);regulation of translational termination (GO:0006449)	cytoplasm (GO:0005737)	0	94.63	94.3925	90.19	87.4126	80.6075
conserved in all	PFC0486c	conserved Plasmodium protein, unknown function		transferase activity (GO:0016740)		plasma membrane (GO:0005886);integral to membrane (GO:0016021)	0	85.19	85.19	74.0741	61.73	74.07
specific to pfal	PFA0625w	surface-associated interspersed gene 1.1 (SURFIN 1.1)					0	11.0327	10.3271	10.35	10.3537	11.38
conserved in all	PFI0535w	phosphatidylinositol N-acetylglucosaminyltransferase, putative		phosphatidylinositol N-acetylglucosaminyltransferase activity (GO:0017176)	GPI anchor biosynthetic process (GO:0006506)	integral to membrane (GO:0016021)	0	69.1318	74.7475	46.42	49.19	62.71
specific to pfal	PFF0575c	conserved Plasmodium protein, unknown function					0	12.0086	14.1498	3.88	4.13	6.56
specific to primate	PF11_0528	conserved Plasmodium protein, unknown function		aminoacyl-tRNA ligase activity (GO:0004812);ATP binding (GO:0005524)	translation (GO:0006412)		0	42.1	42.36	3.68119	7.20553	10.282
conserved in all	PF08_0100	ruvB-like DNA helicase, putative		nucleotide binding (GO:0000166);DNA helicase activity (GO:0003678);ATP binding (GO:0005524);nucleoside-triphosphatase activity (GO:0017111)		nucleus (GO:0005634)	0	81.15	83.08	44.81	63.8623	64.0535
conserved in all	PFL0565w	heat shock protein DNAJ homologue Pfj4		heat shock protein binding (GO:0031072);unfolded protein binding (GO:0051082)	response to unfolded protein (GO:0006986);response to heat (GO:0009408)		0	90.6122	90.6122	45.082	77.551	82.0408
conserved in all	PFF0580w	lsm12, putative					0	59.5506	59.78	56.5	61.24	46.15
conserved in all	PF14_0124	actin II		microfilament motor activity (GO:0000146);structural constituent of cytoskeleton (GO:0005200);protein binding (GO:0005515)	cytoskeleton organization (GO:0007010)	actin filament (GO:0005884)	0	97.61	97.8723	52.66	72.0745	92.0213
conserved in all	PFL0570c	mitochondrial ribosomal protein S18 precursor, putative		structural constituent of ribosome (GO:0003735)	translation (GO:0006412)	intracellular (GO:0005622);ribosome (GO:0005840)	0	52.5301	54.9528	66.0668	63.7037	61.73
conserved in all	PFC0506w	conserved Plasmodium protein, unknown function		ATP binding (GO:0005524);metal ion binding (GO:0046872)		cytoplasm (GO:0005737)	0	75.7353	75.74	78.6765	76.4706	77.21
specific to primate	MAL8P1.111	JmjC domain containing protein				nucleus (GO:0005634)	0	41.8221	43.72	13.2435	12.2261	9.88783
conserved in all	PF11_0139	protein tyrosine phosphatase		protein tyrosine phosphatase activity (GO:0004725);protein tyrosine/serine/threonine phosphatase activity (GO:0008138);phosphatase activity (GO:0016791)	protein amino acid dephosphorylation (GO:0006470);dephosphorylation (GO:0016311);protein prenylation (GO:0018342)	cell surface (GO:0009986);rhoptry (GO:0020008);microneme (GO:0020009)	0	79.19	80.73	76.92	74.2081	75.5656
conserved in all	PFD0550c	conserved Plasmodium protein, unknown function				cytoplasm (GO:0005737)	0	51.22	55.122	64.39	65.37	53.6585
conserved in all	PF14_0127	N-myristoyltransferase		glycylpeptide N-tetradecanoyltransferase activity (GO:0004379)	N-terminal protein myristoylation (GO:0006499)		0	80.49	80.98	66.1	68.61	40.9201
conserved in all	PFC0520w	26S proteasome regulatory subunit S14, putative			ubiquitin-dependent protein catabolic process (GO:0006511)	proteasome regulatory particle (GO:0005838)	0	60.86	59.87	47.74	63.16	60.86
conserved in all	PF11_0141	UDP-galactose transporter, putative		UDP-galactose transmembrane transporter activity (GO:0005459)	UDP-galactose transport (GO:0015785)	membrane (GO:0016020)	0	84.0116	84.3023	77.46	58.6705	76.6571
conserved in all	PFE0580w	kinase binding protein CGI-121, putative					0	50	52.2222	56.7568	60.22	59.67
conserved in all	MAL8P1.110	apicoplast ribosomal protein L33 precursor, putative		structural constituent of ribosome (GO:0003735)	translation (GO:0006412)	plastid large ribosomal subunit (GO:0000311);intracellular (GO:0005622);ribosome (GO:0005840)	0	64.29	66.9643	40.18	60.71	60.71
conserved in all	PFE0585c	myo-inositol 1-phosphate synthase, putative		catalytic activity (GO:0003824);inositol-3-phosphate synthase activity (GO:0004512);binding (GO:0005488)	inositol biosynthetic process (GO:0006021);metabolic process (GO:0008152);phospholipid biosynthetic process (GO:0008654)		0	69.9839	69.9839	47.3	40.3624	48.6
conserved in all	PF14_0128-b	ubiquitin conjugating enzyme, putative		small conjugating protein ligase activity (GO:0019787)	post-translational protein modification (GO:0043687);regulation of protein metabolic process (GO:0051246)		0	66.8874	68.23	54.5752	52.51	64.55
specific to primate	PFF0602w	conserved Plasmodium protein, unknown function		aminoacyl-tRNA hydrolase activity (GO:0004045)	translation (GO:0006412)	cytoplasm (GO:0005737)	0	50.42	50.42	5.72484	5.09666	9.17
conserved in all	PF13_0069	translation initiation factor IF-2, putative		nucleotide binding (GO:0000166);translation initiation factor activity (GO:0003743);GTPase activity (GO:0003924);GTP binding (GO:0005525)	translation (GO:0006412);translational initiation (GO:0006413)	intracellular (GO:0005622);cytoplasm (GO:0005737)	0	58.81	58.44	40.97	49.96	44.87
conserved in all	PFB0570w	secreted protein altered thrombospondin repeat protein			cell-cell adhesion (GO:0016337)	cell surface (GO:0009986);rhoptry (GO:0020008)	0	55.11	59.1603	43.03	51	58.57
conserved in all	PFE0595w	prefoldin subunit, putative		unfolded protein binding (GO:0051082)	protein folding (GO:0006457)	prefoldin complex (GO:0016272)	0	75.6303	74.79	76.47	65.55	75.63
conserved in all	MAL7P1.31	conserved Plasmodium membrane protein, unknown function		transferase activity, transferring phosphorus-containing groups (GO:0016772)	transport (GO:0006810)	membrane (GO:0016020);integral to membrane (GO:0016021);apicoplast (GO:0020011)	0	69.12	71.08	66.01	45.8128	67.8
specific to pfal	PF07_0042	conserved Plasmodium protein, unknown function		DNA binding (GO:0003677);motor activity (GO:0003774);actin binding (GO:0003779);calmodulin binding (GO:0005516);ATP binding (GO:0005524)		cytoplasm (GO:0005737);myosin complex (GO:0016459)	0	13.14	13.7624	8.31044	3.22802	11.75
conserved in all	PF11_0145	glyoxalase I		lactoylglutathione lyase activity (GO:0004462)	methylglyoxal metabolic process (GO:0009438)	cytosol (GO:0005829)	0	74.17	75.77	76.8156	42.98	62.117
conserved in all	PF13_0070	branched-chain alpha keto-acid dehydrogenase, putative		alpha-ketoacid dehydrogenase activity (GO:0003826);oxidoreductase activity, acting on the aldehyde or oxo group of donors, disulfide as acceptor (GO:0016624)	metabolic process (GO:0008152)	mitochondrial alpha-ketoglutarate dehydrogenase complex (GO:0005947)	0	79.12	78.4223	62.5	83.2947	84.4548
conserved in all	PFC0535w	60S ribosomal protein L26, putative		structural constituent of ribosome (GO:0003735)	translation (GO:0006412)	large ribosomal subunit (GO:0015934);cytosolic large ribosomal subunit (GO:0022625)	0	92.13	92.13	86.61	85.04	65.3846
specific to pfal	PFA0665w	DBL containing protein, unknown function		receptor activity (GO:0004872)	pathogenesis (GO:0009405)	membrane (GO:0016020);integral to membrane (GO:0016021)	0	7.48018	6.82759	3.45	3.99724	5.27586
conserved in all	MAL7P1.33	conserved Plasmodium protein, unknown function				apicoplast (GO:0020011)	0	58.7413	63.64	65.78	65.251	64.98
conserved in all	PF07_0043	60S ribosomal protein L34a, putative		structural constituent of ribosome (GO:0003735)	translation (GO:0006412)	intracellular (GO:0005622);ribosome (GO:0005840)	0	89.3333	87.3333	70.7317	75.61	75
conserved in all	PFB0590w	conserved Plasmodium protein, unknown function				membrane (GO:0016020)	0	62.6506	63.86	61.4458	56.0241	62.05
conserved in all	PF11_0147	mitogen-activated protein kinase 2		protein kinase activity (GO:0004672);protein serine/threonine kinase activity (GO:0004674);MAP kinase activity (GO:0004707);protein tyrosine kinase activity (GO:0004713);ATP binding (GO:0005524)	MAPKKK cascade (GO:0000165);protein amino acid phosphorylation (GO:0006468);signal transduction (GO:0007165)		0	74.07	75.6705	74.1748	74.7628	60.12
conserved in all	PF14_0132	40S ribosomal protein S9A, putative		structural constituent of ribosome (GO:0003735);catalytic activity (GO:0003824)	carbohydrate metabolic process (GO:0005975);translation (GO:0006412)	plastid small ribosomal subunit (GO:0000312);intracellular (GO:0005622);ribosome (GO:0005840);apicoplast (GO:0020011)	0	50.0766	50.8527	41.73	48.99	49.54
conserved in all	MAL8P1.108	protein phosphatase, putative		catalytic activity (GO:0003824);protein serine/threonine phosphatase activity (GO:0004722)	protein amino acid dephosphorylation (GO:0006470)	protein serine/threonine phosphatase complex (GO:0008287)	0	78.55	79.54	53.7705	64.92	77.7
conserved in all	PF11_0148	dynein light chain type 2, putative					0	62.36	61.8	56.5714	57.2222	54.29
conserved in all	PFB0595w	heat shock protein 40, putative		heat shock protein binding (GO:0031072);unfolded protein binding (GO:0051082)	protein folding (GO:0006457);response to unfolded protein (GO:0006986);response to heat (GO:0009408)		0	88.4146	88.45	59.82	86.53	81.1
conserved in all	PFF0640w	conserved Plasmodium protein, unknown function				cytoplasm (GO:0005737)	0	60	67.21	66.67	53.33	55.56
conserved in all	PFC0555c	conserved Plasmodium protein, unknown function		nucleotide binding (GO:0000166);DNA binding (GO:0003677)		cytoplasm (GO:0005737);apicoplast (GO:0020011)	0	52.79	55.36	57.551	61.3734	60.5932
conserved in all	PF11_0149-b	rhomboid protease ROM1				integral to membrane (GO:0016021)	0	85.25	83.09	76.62	74.19	80.22
conserved in all	PFB0600c	conserved Plasmodium protein, unknown function				membrane (GO:0016020);apicoplast (GO:0020011)	0	54.3307	58.27	55.12	55.9055	55.12
conserved in all	PF10_0134	conserved Plasmodium protein, unknown function					0	65.82	65.82	60	57.95	48.72
conserved in all	PFB0601c	conserved Plasmodium protein, unknown function					0	85.9	87.18	79.49	84.62	84.62
conserved in all	PFB0605w	protein kinase 7		protein kinase activity (GO:0004672);protein serine/threonine kinase activity (GO:0004674);MAP kinase kinase activity (GO:0004708);protein tyrosine kinase activity (GO:0004713);ATP binding (GO:0005524)	protein amino acid phosphorylation (GO:0006468);signal transduction (GO:0007165)	cytoplasm (GO:0005737)	0	52.03	53.2	51.3043	48.99	58.74
conserved in all	PFE0625w	Rab GTPase 1b		GTPase activity (GO:0003924);protein binding (GO:0005515);GTP binding (GO:0005525)	intracellular protein transport (GO:0006886);nucleocytoplasmic transport (GO:0006913);signal transduction (GO:0007165);small GTPase mediated signal transduction (GO:0007264);protein transport (GO:0015031);regulation of vesicle-mediated transport (GO:0060627)	intracellular (GO:0005622);ER-Golgi intermediate compartment (GO:0005793);membrane (GO:0016020)	0	95	95	40.17	87.5	85
conserved in all	PFF0650w	apicoplast ribosomal protein L18 precursor, putative		structural constituent of ribosome (GO:0003735)	translation (GO:0006412);ribosome biogenesis (GO:0042254)	intracellular (GO:0005622);ribosome (GO:0005840);apicoplast (GO:0020011)	0	53.9171	56.0748	56.81	55.0926	54.6729
conserved in all	PFI0590c	conserved Plasmodium protein, unknown function		zinc ion binding (GO:0008270)		cytoplasm (GO:0005737)	0	48.28	52.1739	47.3441	56.9794	48.73
conserved in all	PFD0600c	mitochondrial ribosomal protein S12 precursor, putative		structural constituent of ribosome (GO:0003735)	translation (GO:0006412)	intracellular (GO:0005622);ribosome (GO:0005840);small ribosomal subunit (GO:0015935)	0	55.46	59.8214	59.52	41.04	61.6279
conserved in all	PF14_0136	diphthamide synthesis protein, putative					0	72.34	71.4868	50.503	46.11	67.0082
conserved in all	PFI0605c	conserved Plasmodium protein, unknown function					0	70.4036	70.18	43.9732	47.6821	62.72
conserved in all	PF14_0137	DnaJ protein, putative		heat shock protein binding (GO:0031072);unfolded protein binding (GO:0051082)	protein folding (GO:0006457)	membrane (GO:0016020)	0	76.9029	77.17	68.5039	67.98	60.37
conserved in all	PFC0571c-a	conserved Plasmodium protein, unknown function					0	64.38	64.1509	60.69	55.4104	58.4291
conserved in all	MAL8P1.106-a	conserved Plasmodium protein, unknown function					0	63.1728	63.48	59.1304	59.13	58.55
conserved in all	MAL13P1.64	ubiquitin-like protein nedd8 homologue, putative			modification-dependent protein catabolic process (GO:0019941)		0	97.37	97.37	92.31	92.31	49.35
specific to pfal	PFD0615c	erythrocyte membrane protein 1, PfEMP1		receptor activity (GO:0004872);cell adhesion molecule binding (GO:0050839)	pathogenesis (GO:0009405);cell-cell adhesion (GO:0016337);rosetting (GO:0020013);antigenic variation (GO:0020033);cytoadherence to microvasculature, mediated by parasite protein (GO:0020035)	integral to membrane (GO:0016021);host cell plasma membrane (GO:0020002);infected host cell surface knob (GO:0020030)	0	9.32127	8.68778	3.58	8.64	7.47
conserved in all	PFL0623c-a	conserved Plasmodium membrane protein, unknown function					0	75.5	74.1722	55.92	71.52	72.85
conserved in all	PFE0650c	conserved Plasmodium protein, unknown function				cytoplasm (GO:0005737)	0	79.1339	78.8845	49.004	81.67	78.49
conserved in all	PF11_0157	glycerol-3-phosphate dehydrogenase, putative		catalytic activity (GO:0003824);glycerol-3-phosphate dehydrogenase (NAD) activity (GO:0004367);binding (GO:0005488);oxidoreductase activity (GO:0016491);protein homodimerization activity (GO:0042803);NAD or NADH binding (GO:0051287)	carbohydrate metabolic process (GO:0005975);glycerol-3-phosphate metabolic process (GO:0006072);metabolic process (GO:0008152);glycerol-3-phosphate catabolic process (GO:0046168);oxidation reduction (GO:0055114)	cytoplasm (GO:0005737);mitochondrion (GO:0005739);glycerol-3-phosphate dehydrogenase complex (GO:0009331)	0	71.14	70.38	66.84	62.28	46.7005
specific to pfal	PFA0700c	Plasmodium exported protein (hyp10), unknown function				membrane (GO:0016020);integral to membrane (GO:0016021);apicoplast (GO:0020011)	0	1.20718	0.844595	4.27184	1.72626	2.33683
conserved in all	PFI0620w	conserved Plasmodium protein, unknown function					0	60	50	61.8	44.9	60.67
specific to pfal	PFA0710c	rifin			antigenic variation (GO:0020033)	membrane (GO:0016020);host cell plasma membrane (GO:0020002)	0	11.46	10.53	6.99301	8.90688	12
conserved in all	PFC0581w	co-chaperone p23			negative regulation of ATPase activity (GO:0032780);cellular chaperone-mediated protein complex assembly (GO:0034619)	cytoplasm (GO:0005737)	0	62.06	64.8208	48.73	60	56.9
conserved in all	PFI0625c	tRNA 1-methyladenosine methyltransferase subunit, putative		DNA binding (GO:0003677);translation initiation factor activity (GO:0003743);DNA-directed RNA polymerase activity (GO:0003899);nucleotidyltransferase activity (GO:0016779)	transcription (GO:0006350);translational initiation (GO:0006413);regulation of translational initiation (GO:0006446);tRNA processing (GO:0008033)	nucleus (GO:0005634)	0	45.47	46.9841	49.1086	50.08	45.87
conserved in all	PFC0582c-a	vesicle transport v-SNARE protein, putative					0	71.2121	72.73	57.79	46.33	72.86
conserved in all	PFI0630w	26S proteasome regulatory subunit, putative					0	84.9112	86.0947	47.6331	84.9112	81.07
specific to pfal	PF07_0048	erythrocyte membrane protein 1, PfEMP1		receptor activity (GO:0004872);cell adhesion molecule binding (GO:0050839)	pathogenesis (GO:0009405);cell-cell adhesion (GO:0016337);rosetting (GO:0020013);antigenic variation (GO:0020033);cytoadherence to microvasculature, mediated by parasite protein (GO:0020035)	integral to membrane (GO:0016021);host cell plasma membrane (GO:0020002);infected host cell surface knob (GO:0020030)	0	9.53	10.16	5.55	7.94	5.59819
conserved in all	PFE0660c	purine nucleoside phosphorylase		catalytic activity (GO:0003824)	nucleoside metabolic process (GO:0009116)		0	81.3008	81.3008	69.64	78.78	78.37
conserved in all	PFI0635c	conserved Plasmodium protein, unknown function					0	64.63	63.2653	49.66	66.67	66.67
specific to pfal	PFD0625c	erythrocyte membrane protein 1, PfEMP1		receptor activity (GO:0004872);cell adhesion molecule binding (GO:0050839)	pathogenesis (GO:0009405);cell-cell adhesion (GO:0016337);rosetting (GO:0020013);antigenic variation (GO:0020033);cytoadherence to microvasculature, mediated by parasite protein (GO:0020035)	integral to membrane (GO:0016021);host cell plasma membrane (GO:0020002);infected host cell surface knob (GO:0020030)	0	11.79	10.7	3.12	8.78	5.53117
conserved in all	PF14_0141	60S ribosomal protein L10, putative		structural constituent of ribosome (GO:0003735)	translation (GO:0006412)	intracellular (GO:0005622);ribosome (GO:0005840);cytosolic large ribosomal subunit (GO:0022625)	0	96.35	96.8037	71.3636	97.2603	62.73
conserved in all	PFE0670w	mitochondrial matrix protein, putative		heat shock protein binding (GO:0031072)	intracellular protein transmembrane transport (GO:0065002)	mitochondrion (GO:0005739);mitochondrial inner membrane (GO:0005743);integral to membrane (GO:0016021);apicoplast (GO:0020011)	0	80.65	81.4516	77.42	78.23	77.42
conserved in all	PFE0665c	GTP binding protein, putative		GTP binding (GO:0005525);guanyl nucleotide binding (GO:0019001)		intracellular (GO:0005622)	0	64.11	67.5958	75.26	73.08	72.03
conserved in all	PF14_0142	serine/threonine protein phosphatase		protein serine/threonine phosphatase activity (GO:0004722);hydrolase activity (GO:0016787)	protein amino acid dephosphorylation (GO:0006470)		0	100	100	40.06	81.91	99.0132
conserved in all	PFC0595c	serine/threonine protein phosphatase, putative		protein serine/threonine phosphatase activity (GO:0004722);hydrolase activity (GO:0016787)	protein amino acid dephosphorylation (GO:0006470)		0	96.43	96.1039	94.4805	93.8312	94.4805
conserved in all	PFL0640w	conserved Plasmodium protein, unknown function					0	54.58	53.24	50.8772	54.68	54.74
conserved in all	MAL8P1.103	conserved Plasmodium protein, unknown function					0	81.63	81.4332	78.23	62.91	79.87
conserved in all	PFI0655c	conserved Plasmodium protein, unknown function			translation (GO:0006412);translational elongation (GO:0006414)	cytoplasm (GO:0005737)	0	73.81	73.81	76.9231	73.99	76.19
specific to pfal	PFA0725w	surface-associated interspersed protein 1.3 (SURFIN 1.3)					0	11.1856	10.0466	6.91	11.7252	12.57
specific to pfal	PF07_0049	erythrocyte membrane protein 1, PfEMP1		receptor activity (GO:0004872);zinc ion binding (GO:0008270);cell adhesion molecule binding (GO:0050839)	pathogenesis (GO:0009405);cell-cell adhesion (GO:0016337);rosetting (GO:0020013);antigenic variation (GO:0020033);cytoadherence to microvasculature, mediated by parasite protein (GO:0020035)	integral to membrane (GO:0016021);host cell plasma membrane (GO:0020002);infected host cell surface knob (GO:0020030)	0	8.26	8.13187	2.68	7.78	5.97802
specific to pfal	PFD0630c	erythrocyte membrane protein 1, PfEMP1		receptor activity (GO:0004872);cell adhesion molecule binding (GO:0050839)	pathogenesis (GO:0009405);cell-cell adhesion (GO:0016337);rosetting (GO:0020013);antigenic variation (GO:0020033);cytoadherence to microvasculature, mediated by parasite protein (GO:0020035)	integral to membrane (GO:0016021);host cell plasma membrane (GO:0020002);infected host cell surface knob (GO:0020030)	0	8.51708	8.25767	2.9	8.22	4.80104
conserved in all	PFE0690c	Rab GTPase 1a		GTPase activity (GO:0003924);protein binding (GO:0005515);GTP binding (GO:0005525)	intracellular protein transport (GO:0006886);nucleocytoplasmic transport (GO:0006913);signal transduction (GO:0007165);small GTPase mediated signal transduction (GO:0007264);protein transport (GO:0015031);regulation of vesicle-mediated transport (GO:0060627)	intracellular (GO:0005622);ER-Golgi intermediate compartment (GO:0005793);membrane (GO:0016020)	0	81.6425	83.0918	61.84	51.6908	59.7156
conserved in all	PFL0660w	dynein light chain 1, putative		motor activity (GO:0003774);microtubule motor activity (GO:0003777)	microtubule-based process (GO:0007017);microtubule-based movement (GO:0007018)	cytoplasmic dynein complex (GO:0005868);microtubule associated complex (GO:0005875)	0	100	100	98.9247	98.9247	98.9247
specific to primate	PFF0680c	thiamin-phosphate pyrophosphorylase, putative		thiamin-phosphate diphosphorylase activity (GO:0004789)	thiamin biosynthetic process (GO:0009228)		0	40.4293	42.78	12.64	14.87	14.52
specific to primate	PFE1030c	phosphomethylpyrimidine kinase, putative		kinase activity (GO:0016301)	thiamin biosynthetic process (GO:0009228)		0	67.2897	65.3495	7.20961	3.93333	13.9269
specific to primate	PFL1920c	hydroxyethylthiazole kinase, putative		hydroxyethylthiazole kinase activity (GO:0004417)	thiamin biosynthetic process (GO:0009228)	mitochondrion (GO:0005739)	0	75.8278	78.1457	11.92	25.17	9.60265
specific to pfal	PFB0650w	conserved Plasmodium protein, unknown function					0	9.42869	8.71048	4.56	5.08	6.92
conserved in all	PFL0665c	RNA polymerase subunit 8c, putative		DNA-directed RNA polymerase activity (GO:0003899)	transcription (GO:0006350);transcription initiation (GO:0006352)		0	91.7241	92.4138	86.21	68.28	86.9
conserved in all	PF11_0163	transcription factor with AP2 domain(s), putative		transcription factor activity (GO:0003700)	regulation of transcription, DNA-dependent (GO:0006355)		0	60	61.6667	60.92	61.3445	61.18
conserved in all	PF11_0164	peptidyl-prolyl cis-trans isomerase,cyclophilin		peptidyl-prolyl cis-trans isomerase activity (GO:0003755);cyclosporin A binding (GO:0016018)	protein folding (GO:0006457)	endoplasmic reticulum (GO:0005783)	0	78.9744	78.9744	61.0256	76.02	78.9744
specific to pfal	PFA0740w	rifin			antigenic variation (GO:0020033)	membrane (GO:0016020);host cell plasma membrane (GO:0020002)	0	0	2.91602	9.13978	7.32519	8.50515
conserved in all	PF10_0144	prohibitin, putative			cellular process (GO:0009987)	mitochondrion (GO:0005739);membrane (GO:0016020)	0	84.64	83.8816	43.32	63.93	84.8684
specific to pfal	PFA0745w	rifin			antigenic variation (GO:0020033)	membrane (GO:0016020);host cell plasma membrane (GO:0020002)	0	0	0	12.8	0	0
conserved in all	PF14_0146	ribonucleoprotein, putative			RNA splicing (GO:0008380)	spliceosomal complex (GO:0005681)	0	73.8916	73.4	55.2239	67.9803	59.62
specific to pfal	PFD0635c	erythrocyte membrane protein 1, PfEMP1		receptor activity (GO:0004872);cell adhesion molecule binding (GO:0050839)	pathogenesis (GO:0009405);cell-cell adhesion (GO:0016337);rosetting (GO:0020013);antigenic variation (GO:0020033);cytoadherence to microvasculature, mediated by parasite protein (GO:0020035)	integral to membrane (GO:0016021);host cell plasma membrane (GO:0020002);infected host cell surface knob (GO:0020030)	0	7.82123	8.33691	2.88	8.43	4.77214
specific to pfal	PFA0750w	stevor				membrane (GO:0016020);Maurer's cleft (GO:0020036)	0	6.21039	7.97	6.70391	10.2767	3.07557
specific to pfal	MAL7P1.50	erythrocyte membrane protein 1, PfEMP1		receptor activity (GO:0004872);cell adhesion molecule binding (GO:0050839)	pathogenesis (GO:0009405);cell-cell adhesion (GO:0016337);rosetting (GO:0020013);antigenic variation (GO:0020033);cytoadherence to microvasculature, mediated by parasite protein (GO:0020035)	integral to membrane (GO:0016021);host cell plasma membrane (GO:0020002);infected host cell surface knob (GO:0020030)	0	9.34744	9.0869	5.34	1.81	5.69034
conserved in all	MAL13P1.71	conserved Plasmodium protein, unknown function				cytoplasm (GO:0005737);membrane (GO:0016020)	0	67.75	68.25	64.5	66.25	58.4577
conserved in all	PF11_0167	conserved Plasmodium membrane protein, unknown function		receptor activity (GO:0004872);zinc ion binding (GO:0008270);acyltransferase activity (GO:0008415)	multicellular organismal development (GO:0007275)	membrane (GO:0016020);integral to membrane (GO:0016021)	0	64.85	66.21	50.85	49.83	59.04
conserved in all	PFL0680c	conserved Plasmodium protein, unknown function					0	68.4932	66.44	58.9041	63.0137	63.0137
conserved in all	PFB0670c	conserved Plasmodium protein, unknown function				membrane (GO:0016020)	0	50	50.83	41.91	50.96	53.92
conserved in all	MAL8P1.100	conserved Plasmodium protein, unknown function					0	61.17	63.05	57.61	63.05	51.77
specific to pfal	PFA0760w	rifin			antigenic variation (GO:0020033)	membrane (GO:0016020);host cell plasma membrane (GO:0020002)	0	8.62866	9.04685	9.76253	0	2.19895
conserved in all	PFE0725c	conserved Plasmodium membrane protein, unknown function				membrane (GO:0016020)	0	66.67	67.13	53.95	57.67	58.6
conserved in all	PF14_0148	uracil-DNA glycosylase, putative		uracil DNA N-glycosylase activity (GO:0004844)	base-excision repair (GO:0006284)		0	64.6	65.53	64.6341	65.84	63.78
conserved in all	PFE0730c	ribose 5-phosphate epimerase, putative		ribose-5-phosphate isomerase activity (GO:0004751)	pentose-phosphate shunt, non-oxidative branch (GO:0009052)		0	76.3713	75.95	63.71	73.5294	74.37
absent in pkno	PFC0630w	zinc finger protein, putative		zinc ion binding (GO:0008270)			0	50.26	12.17	44.33	36.22	47.94
specific to pfal	PF07_0050	erythrocyte membrane protein 1, PfEMP1		receptor activity (GO:0004872);cell adhesion molecule binding (GO:0050839)	pathogenesis (GO:0009405);cell-cell adhesion (GO:0016337);rosetting (GO:0020013);antigenic variation (GO:0020033);cytoadherence to microvasculature, mediated by parasite protein (GO:0020035)	integral to membrane (GO:0016021);host cell plasma membrane (GO:0020002);infected host cell surface knob (GO:0020030)	0	10.6712	9.68054	4.22	5.66312	5.71705
conserved in all	PFI0695c	phospholipid or glycerol acyltransferase, putative		acyltransferase activity (GO:0008415)	metabolic process (GO:0008152)	apicoplast (GO:0020011)	0	66.3484	66.11	57.4766	59.7619	58.71
conserved in all	PFL0692c	geranylgeranyltransferase type2 beta subunit, putative		catalytic activity (GO:0003824)	protein amino acid geranylgeranylation (GO:0018348)	membrane (GO:0016020)	0	55.17	55.11	50.1144	46.3138	54.48
specific to pfal	PFA0765c	erythrocyte membrane protein 1, PfEMP1		receptor activity (GO:0004872);cell adhesion molecule binding (GO:0050839)	pathogenesis (GO:0009405);cell-cell adhesion (GO:0016337);rosetting (GO:0020013);antigenic variation (GO:0020033);cytoadherence to microvasculature, mediated by parasite protein (GO:0020035)	integral to membrane (GO:0016021);outer membrane (GO:0019867);host cell plasma membrane (GO:0020002);infected host cell surface knob (GO:0020030)	0	9.11978	8.53382	5.58	6.49	8.61
specific to pfal	PFD0640c	rifin			antigenic variation (GO:0020033)	membrane (GO:0016020);host cell plasma membrane (GO:0020002)	0	3.65325	3.92262	4.37731	9.84	10.9043
absent in pkno	PFC0635c	translation initiation factor 4E		RNA cap binding (GO:0000339);RNA binding (GO:0003723);translation initiation factor activity (GO:0003743)	translational initiation (GO:0006413)	cytoplasm (GO:0005737);eukaryotic translation initiation factor 4F complex (GO:0016281)	0	85.022	3.82775	13.0435	92.511	92.07
conserved in all	PF14_0150	DNA-directed RNA polymerase I/III subunit, putative		DNA binding (GO:0003677);DNA-directed RNA polymerase activity (GO:0003899);protein dimerization activity (GO:0046983)	transcription (GO:0006350)		0	80.4124	80.21	68.75	79.17	78.12
conserved in all	PFL0705c	adrenodoxin-type ferredoxin, putative		electron carrier activity (GO:0009055);iron-sulfur cluster binding (GO:0051536);2 iron, 2 sulfur cluster binding (GO:0051537)	electron transport (GO:0006118)	mitochondrion (GO:0005739);membrane (GO:0016020)	0	74.05	75.32	64.56	70.25	70.25
conserved in all	PF14_0151	RNA-binding protein Nova-1, putative		RNA binding (GO:0003723)			0	78.9318	78.34	48.8439	46.86	64.4509
conserved in all	PFF0715c	endonuclease III homologue, putative		DNA binding (GO:0003677);catalytic activity (GO:0003824);endonuclease activity (GO:0004519);4 iron, 4 sulfur cluster binding (GO:0051539)	DNA repair (GO:0006281);base-excision repair (GO:0006284)		0	42.09	44.29	48.06	52.86	52.27
conserved in all	PF11_0169	SNO glutamine amidotransferase family protein		glutaminase activity (GO:0004359)	response to singlet oxygen (GO:0000304);vitamin B6 biosynthetic process (GO:0042819)	cytosol (GO:0005829)	0	74.55	70.9091	64.6	62.39	63.27
specific to pfal	PFD0645w	rifin			antigenic variation (GO:0020033)	membrane (GO:0016020);host cell plasma membrane (GO:0020002)	0	11.0482	12.5	9.48276	3.58586	8.06175
conserved in all	PF11_0170	cyclophilin, putative		peptidyl-prolyl cis-trans isomerase activity (GO:0003755)	protein folding (GO:0006457)		0	88.024	89.8204	89.2216	79.88	89.22
conserved in all	PFI0705w	conserved Plasmodium protein, unknown function		nucleotide binding (GO:0000166)		nucleus (GO:0005634);cytoplasm (GO:0005737)	0	93.98	94.38	89.96	85.9438	89.16
conserved in all	PF10_0150	methionine aminopeptidase 1b, putative		aminopeptidase activity (GO:0004177);metalloexopeptidase activity (GO:0008235);methionyl aminopeptidase activity (GO:0004239)	protein modification process (GO:0006464);proteolysis (GO:0006508);cellular process (GO:0009987)		0	61.9403	64.86	64.26	42.38	63.5674
conserved in all	PFL0720w	conserved Plasmodium membrane protein, unknown function		binding (GO:0005488);L-malate dehydrogenase activity (GO:0030060)	glycolysis (GO:0006096);tricarboxylic acid cycle (GO:0006099);malate metabolic process (GO:0006108);tricarboxylic acid cycle intermediate metabolic process (GO:0006100)	integral to membrane (GO:0016021)	0	93.0612	91.84	90.6122	79.5918	91.43
conserved in all	PF11_0171	ER membrane protein Sec12		guanyl-nucleotide exchange factor activity (GO:0005085);GTP binding (GO:0005525)	ER to Golgi vesicle-mediated transport (GO:0006888)	integral to endoplasmic reticulum membrane (GO:0030176)	0	59.47	59.26	60.6186	52.3711	50.93
conserved in all	PFL0725w	thioredoxin peroxidase 2		thioredoxin peroxidase activity (GO:0008379);antioxidant activity (GO:0016209);oxidoreductase activity (GO:0016491)	response to oxidative stress (GO:0006979);cell redox homeostasis (GO:0045454)	mitochondrion (GO:0005739)	0	78.341	78.341	75.9259	55.2	76.39
conserved in all	PFD0660w	phosphoglycerate mutase, putative		phosphoglycerate mutase activity (GO:0004619)	glycolysis (GO:0006096)		0	68.71	74.1611	52.5424	68.8963	54.93
specific to pfal	PF07_0051	erythrocyte membrane protein 1, PfEMP1		receptor activity (GO:0004872);cell adhesion molecule binding (GO:0050839)	pathogenesis (GO:0009405);cell-cell adhesion (GO:0016337);rosetting (GO:0020013);antigenic variation (GO:0020033);cytoadherence to microvasculature, mediated by parasite protein (GO:0020035)	integral to membrane (GO:0016021);host cell plasma membrane (GO:0020002);infected host cell surface knob (GO:0020030)	0	8.71332	10.16	4.97	7.95	4.69526
conserved in all	PFF0730c	enoyl-acyl carrier reductase		catalytic activity (GO:0003824);enoyl-[acyl-carrier-protein] reductase (NADH) activity (GO:0004318);binding (GO:0005488);enoyl-[acyl-carrier-protein] reductase activity (GO:0016631)	fatty acid biosynthetic process (GO:0006633);metabolic process (GO:0008152);oxidation reduction (GO:0055114)	apicoplast (GO:0020011)	0	57.1429	60.19	61.98	61.01	51.83
conserved in all	PF08_0087	karyopherin alpha		binding (GO:0005488);protein transporter activity (GO:0008565);protein domain specific binding (GO:0019904);protein heterodimerization activity (GO:0046982)	protein import into nucleus (GO:0006606);NLS-bearing substrate import into nucleus (GO:0006607);intracellular protein transport (GO:0006886);nucleocytoplasmic transport (GO:0006913)	nucleus (GO:0005634);nuclear pore (GO:0005643);cytoplasm (GO:0005737);karyopherin docking complex (GO:0031015)	0	94.5	94.5	50.64	52.5547	95.78
conserved in all	PFD0670c	lysine decarboxylase-like protein, putative					0	76.92	76.47	57.5145	60.06	60.81
conserved in all	PFB0690w	conserved Plasmodium protein, unknown function				cytoplasm (GO:0005737)	0	45.082	46.5306	60.82	59.1837	60.41
conserved in all	PF13_0084	ubiquitin-like protein, putative			modification-dependent protein catabolic process (GO:0019941)		0	58.76	57.63	45.2	46.8927	58.1921
absent in pkno	PFC0675c	mitochondrial ribosomal protein L29/L47 precursor, putative		structural constituent of ribosome (GO:0003735)	translation (GO:0006412)	intracellular (GO:0005622);mitochondrial ribosome (GO:0005761);ribosome (GO:0005840)	0	71.98	9.32039	77.3504	77.78	76.824
conserved in all	PF08_0085	ubiquitin conjugating enzyme, putative		ubiquitin-protein ligase activity (GO:0004842);small conjugating protein ligase activity (GO:0019787)	ubiquitin-dependent protein catabolic process (GO:0006511);post-translational protein modification (GO:0043687);regulation of protein metabolic process (GO:0051246)		0	89.6341	89.0244	92.73	55.2147	92.1212
conserved in all	PFI0725c	GINS complex subunit Psf3, putative					0	90.3846	85.58	89	87.9808	88.4615
conserved in all	MAL13P1.76	TFIIH basal transcription factor subunit		protein binding (GO:0005515);zinc ion binding (GO:0008270)	DNA repair (GO:0006281);regulation of transcription (GO:0045449)	nucleus (GO:0005634)	0	79.8005	79.8005	80.5486	78.3042	54.8628
conserved in all	PF10_0154	ribonucleotide reductase small subunit, putative		ribonucleoside-diphosphate reductase activity (GO:0004748);oxidoreductase activity (GO:0016491);transition metal ion binding (GO:0046914)	DNA replication (GO:0006260);deoxyribonucleoside diphosphate metabolic process (GO:0009186)		0	87.7612	86.87	43.5821	58.75	73.43
conserved in all	PF08_0084	RNA-binding protein (U1 snRNP-like), putative		nucleic acid binding (GO:0003676);zinc ion binding (GO:0008270)		nucleus (GO:0005634)	0	41.8033	44.4	47.06	49.58	50
conserved in all	PF10_0155	enolase		phosphopyruvate hydratase activity (GO:0004634)	autophagic vacuole assembly (GO:0000045);activation of immune response (GO:0002253);gluconeogenesis (GO:0006094);glycolysis (GO:0006096);transcription (GO:0006350)	phosphopyruvate hydratase complex (GO:0000015);nucleus (GO:0005634);cytoplasm (GO:0005737);cytoskeleton (GO:0005856);plasma membrane (GO:0005886);cell surface (GO:0009986);food vacuole (GO:0020020)	0	94.3946	93.722	47.31	92.1525	92.15
conserved in all	MAL13P1.77	conserved Plasmodium protein, unknown function				membrane (GO:0016020);integral to membrane (GO:0016021)	0	70.0935	69.63	61.215	65.4206	66.82
specific to pfal	MAL7P1.55	erythrocyte membrane protein 1, PfEMP1		receptor activity (GO:0004872);cell adhesion molecule binding (GO:0050839)	pathogenesis (GO:0009405);cell-cell adhesion (GO:0016337);rosetting (GO:0020013);antigenic variation (GO:0020033);cytoadherence to microvasculature, mediated by parasite protein (GO:0020035)	integral to membrane (GO:0016021);host cell plasma membrane (GO:0020002);infected host cell surface knob (GO:0020030)	0	8.79857	8.97722	4.78	9.56	5.67218
conserved in all	PF13_0085	serine/threonine protein kinase		protein kinase activity (GO:0004672);protein serine/threonine kinase activity (GO:0004674);protein tyrosine kinase activity (GO:0004713);ATP binding (GO:0005524)	protein amino acid phosphorylation (GO:0006468);histone phosphorylation (GO:0016572)	cytosol (GO:0005829);symbiont-containing vacuole membrane (GO:0020005)	0	81.5718	82.3848	75	71.74	81.79
absent in pkno	PFC0685w	conserved Plasmodium membrane protein, unknown function				membrane (GO:0016020)	0	50	13.4928	30.77	45.1544	45.16
specific to pfal	MAL8P1.97	hypothetical protein		ATP binding (GO:0005524);chemokine activity (GO:0008009)	transport (GO:0006810);immune response (GO:0006955)	extracellular region (GO:0005576);membrane (GO:0016020);integral to membrane (GO:0016021)	0	8.07039	11.0687	6.06	6.19	8.74
conserved in all	PF14_0156	small subunit rRNA dimethylase, putative		rRNA (adenine-N6,N6-)-dimethyltransferase activity (GO:0000179);rRNA methyltransferase activity (GO:0008649)	rRNA modification (GO:0000154);rRNA processing (GO:0006364)	mitochondrion (GO:0005739)	0	70.6444	73.42	76.1658	75.8442	64.84
conserved in all	PF14_0157	conserved Plasmodium protein, unknown function		zinc ion binding (GO:0008270)		nucleus (GO:0005634)	0	73.83	71.17	73.65	66	71.6216
conserved in all	PFI0740c	ubiquitin conjugating enzyme, putative		small conjugating protein ligase activity (GO:0019787)	post-translational protein modification (GO:0043687);regulation of protein metabolic process (GO:0051246)		0	98.7421	98.7421	67.92	96.23	40.4624
absent in pkno	PFC0700c	conserved Plasmodium protein, unknown function		ATP binding (GO:0005524)			0	45.31	14.01	35.65	30.55	41.23
specific to primate	PFD0690c	conserved Plasmodium membrane protein, unknown function		nucleotide binding (GO:0000166)		cytoplasm (GO:0005737);apicoplast (GO:0020011)	0	55.6735	55.768	7.11	13.5789	6.26263
conserved in all	PF11_0175a	conserved Plasmodium protein, unknown function					0	51.17	49.7653	49.3	51.82	47.89
conserved in all	PFF0750w	cdc2-related protein kinase 5		protein kinase activity (GO:0004672);protein serine/threonine kinase activity (GO:0004674);cyclin-dependent protein kinase activity (GO:0004693);protein tyrosine kinase activity (GO:0004713);ATP binding (GO:0005524)	protein amino acid phosphorylation (GO:0006468);regulation of cell cycle (GO:0051726)		0	74.86	76.23	43.1849	66.53	44.54
conserved in all	PF13_0086	conserved Plasmodium protein, unknown function				membrane (GO:0016020)	0	44.69	48.06	45.7831	48.13	40.66
specific to pfal	MAL7P1.56	erythrocyte membrane protein 1, PfEMP1		receptor activity (GO:0004872);cell adhesion molecule binding (GO:0050839)	pathogenesis (GO:0009405);cell-cell adhesion (GO:0016337);rosetting (GO:0020013);antigenic variation (GO:0020033);cytoadherence to microvasculature, mediated by parasite protein (GO:0020035)	integral to membrane (GO:0016021);host cell plasma membrane (GO:0020002);infected host cell surface knob (GO:0020030)	0	9.16553	9.0205	5.02	6.43	6.2
conserved in all	PFL0780w	glycerol-3-phosphate dehydrogenase, putative		catalytic activity (GO:0003824);glycerol-3-phosphate dehydrogenase (NAD) activity (GO:0004367);binding (GO:0005488);oxidoreductase activity (GO:0016491);protein homodimerization activity (GO:0042803);NAD or NADH binding (GO:0051287)	carbohydrate metabolic process (GO:0005975);glycerol-3-phosphate metabolic process (GO:0006072);metabolic process (GO:0008152);glycerol-3-phosphate catabolic process (GO:0046168);oxidation reduction (GO:0055114)	cytoplasm (GO:0005737);glycerol-3-phosphate dehydrogenase complex (GO:0009331)	0	78.4741	75.75	42.78	65.9401	62.67
conserved in all	PFI0755c	6-phosphofructokinase		catalytic activity (GO:0003824);6-phosphofructokinase activity (GO:0003872);ATP binding (GO:0005524);diphosphate-fructose-6-phosphate 1-phosphotransferase activity (GO:0047334)	glycolysis (GO:0006096);metabolic process (GO:0008152)	cytoplasm (GO:0005737);6-phosphofructokinase complex (GO:0005945)	0	83.1359	83	44.0252	44.2024	48.91
specific to pfal	PF10_0159	glycophorin binding protein				membrane (GO:0016020);host cell cytoplasm (GO:0030430)	0	9.45	14.6845	11.65	12.0146	11.5822
conserved in all	PF11_0177	deubiquinating/deneddylating enzyme		ubiquitin thiolesterase activity (GO:0004221)	protein deneddylation (GO:0000338);ubiquitin-dependent protein catabolic process (GO:0006511);protein deubiquitination (GO:0016579)	intracellular (GO:0005622)	0	50.85	54.53	41.2903	47.96	46.81
conserved in all	MAL8P1.96	CS domain protein, putative					0	64.97	65.61	40.26	55.38	62.3
conserved in all	PFE0785c	metabolite/drug transporter, putative					0	85.41	85.81	81.5618	80.9111	80.69
conserved in all	PFF0760w	RNA and export factor binding protein, putative		nucleic acid binding (GO:0003676);RNA binding (GO:0003723)			0	67.3077	67.9487	66.46	57.5	63.35
specific to pfal	MAL7P1.57	rifin			antigenic variation (GO:0020033)	membrane (GO:0016020);host cell plasma membrane (GO:0020002)	0	0	11.0865	9.24855	12.8857	14.8825
absent in pkno	PFC0710w-a	inorganic pyrophosphatase, putative		magnesium ion binding (GO:0000287);inorganic diphosphatase activity (GO:0004427)	phosphate metabolic process (GO:0006796)	cytoplasm (GO:0005737)	0	54.27	9.28	53.8106	47.11	45.7275
conserved in all	PFL0800c	cell traversal protein for ookinetes and sporozoites					0	43.24	43.7838	46.74	45.41	44.86
conserved in all	PFI0770c	conserved Plasmodium protein, unknown function					0	81.58	81.0526	66.14	81.68	81.1518
conserved in all	PFD0700c	RNA binding protein, putative		nucleic acid binding (GO:0003676)	RNA metabolic process (GO:0016070)		0	69.72	68.33	67.88	64.35	67.04
conserved in all	PFI0775w	glycolipid transfer protein, putative		glycolipid transporter activity (GO:0017089);glycolipid binding (GO:0051861)	glycolipid transport (GO:0046836)	cytoplasm (GO:0005737)	0	60.83	61.7512	64.52	63.1336	63.1336
conserved in all	PFD0705c	conserved protein, unknown function				nucleus (GO:0005634)	0	76.17	77.02	73.1915	74.5763	75.74
conserved in all	PF14_0164	NADP-specific glutamate dehydrogenase		catalytic activity (GO:0003824);glutamate dehydrogenase (NADP) activity (GO:0004354);binding (GO:0005488);oxidoreductase activity (GO:0016491)	cellular amino acid metabolic process (GO:0006520);glutamate metabolic process (GO:0006536);metabolic process (GO:0008152);oxidation reduction (GO:0055114)		0	86.1702	85.7447	58.7002	68.5106	58.09
conserved in all	PF11_0182	conserved Plasmodium protein, unknown function		translation release factor activity (GO:0003747);translation release factor activity, codon specific (GO:0016149)	translation (GO:0006412);translational termination (GO:0006415)	cytoplasm (GO:0005737)	0	77.78	79.74	77.78	78.43	77.12
conserved in all	MAL13P1.84	protein kinase, putative		protein kinase activity (GO:0004672);protein serine/threonine kinase activity (GO:0004674);protein tyrosine kinase activity (GO:0004713);ATP binding (GO:0005524)	protein amino acid phosphorylation (GO:0006468)		0	75.8	73.3333	62.1019	55.0955	77.07
conserved in all	PF11_0183	GTP-binding nuclear protein ran/tc4		GTPase activity (GO:0003924);protein binding (GO:0005515);GTP binding (GO:0005525)	RNA export from nucleus (GO:0006405);intracellular protein transport (GO:0006886);nucleocytoplasmic transport (GO:0006913);signal transduction (GO:0007165);small GTPase mediated signal transduction (GO:0007264);protein transport (GO:0015031);regulation of cell cycle (GO:0051726)	intracellular (GO:0005622);nucleus (GO:0005634)	0	100	99.07	99.07	99.07	99.07
specific to pfal	PFE0805w	cation-transporting ATPase 1		ATP binding (GO:0005524);cation transmembrane transporter activity (GO:0008324);ATPase activity, coupled to transmembrane movement of ions, phosphorylative mechanism (GO:0015662)	ATP biosynthetic process (GO:0006754);cation transport (GO:0006812)	membrane (GO:0016020);integral to membrane (GO:0016021);apicoplast (GO:0020011)	0	12.0497	13.8398	8.63787	7.60645	12.5312
conserved in all	PFD0720w	conserved ARM repeats protein, unknown function		binding (GO:0005488);protein transporter activity (GO:0008565)	protein import into nucleus (GO:0006606)	nucleus (GO:0005634);nuclear pore (GO:0005643);cytoplasm (GO:0005737);cytoskeleton (GO:0005856);membrane (GO:0016020)	0	94.91	95.2727	65.09	93.09	92
conserved in all	PFL0820c	conserved Plasmodium protein, unknown function					0	57.75	57.75	47.8873	55.94	50
conserved in all	PFC0735w	40S ribosomal protein S15A, putative		structural constituent of ribosome (GO:0003735)	translation (GO:0006412)	intracellular (GO:0005622);ribosome (GO:0005840);cytosolic small ribosomal subunit (GO:0022627)	0	97.6923	97.6923	98.4615	98.4615	98.4615
conserved in all	PFE0810c	40S ribosomal protein S14, putative		RNA binding (GO:0003723);structural constituent of ribosome (GO:0003735)	translation (GO:0006412)	intracellular (GO:0005622);ribosome (GO:0005840);cytosolic small ribosomal subunit (GO:0022627)	0	98.68	98.68	55.63	98.6755	93.38
conserved in all	PFF0790c	conserved Plasmodium protein, unknown function				nucleus (GO:0005634);membrane (GO:0016020)	0	45.3744	46.26	44.4934	47.14	44.9339
conserved in all	PFL0825c-b	conserved Plasmodium protein, unknown function		DNA binding (GO:0003677);catalytic activity (GO:0003824);ATP binding (GO:0005524)	DNA metabolic process (GO:0006259)	chromosome (GO:0005694)	0	62.01	61.7	40.37	58.23	62.2
conserved in all	PF08_0076	40S ribosomal protein S16, putative		structural constituent of ribosome (GO:0003735)	translation (GO:0006412)	intracellular (GO:0005622);ribosome (GO:0005840);cytosolic small ribosomal subunit (GO:0022627)	0	95.14	94.4444	86.11	93.75	93.75
conserved in all	PFC0745c	proteasome component C8, putative		endopeptidase activity (GO:0004175);threonine-type endopeptidase activity (GO:0004298)	ubiquitin-dependent protein catabolic process (GO:0006511);proteolysis involved in cellular protein catabolic process (GO:0051603)	proteasome core complex (GO:0005839)	0	74.7036	75.89	61.1111	75.7937	65.48
absent in pkno	PF14_0805	conserved Plasmodium protein, unknown function				cytoplasm (GO:0005737)	0	57.2464	6.10413	28.79	52.27	53.03
conserved in all	PF08_0075	60S ribosomal protein L13-2, putative		structural constituent of ribosome (GO:0003735)	translation (GO:0006412)	intracellular (GO:0005622);ribosome (GO:0005840);cytosolic large ribosomal subunit (GO:0022625)	0	80.47	81.4	73.49	73.49	74.42
conserved in all	PF13_0090a	conserved Plasmodium protein, unknown function					0	59.05	60	55.24	56.19	57.14
conserved in all	PFE0825w	metabolite/drug transporter, putative		transporter activity (GO:0005215);tetracycline:hydrogen antiporter activity (GO:0015520)	transport (GO:0006810);tetracycline transport (GO:0015904);response to antibiotic (GO:0046677)	integral to membrane (GO:0016021)	0	79.4118	78.0543	58.6	76.9752	79.05
specific to primate	PF11_0186	conserved Plasmodium protein, unknown function					0	65.17	64.18	3.25035	1.47813	7.07214
absent in pkno	PF14_0167	prefoldin subunit 2, putative		unfolded protein binding (GO:0051082)	protein folding (GO:0006457)	prefoldin complex (GO:0016272)	0	67.35	12.9252	66.67	61.2245	65.5405
conserved in all	PF11_0187	clathrin assembly protein AP19, putative		protein binding (GO:0005515);protein transporter activity (GO:0008565)	transport (GO:0006810);intracellular protein transport (GO:0006886);protein transport (GO:0015031);vesicle-mediated transport (GO:0016192)	membrane coat (GO:0030117);clathrin coat of trans-Golgi network vesicle (GO:0030130);clathrin adaptor complex (GO:0030131)	0	94.84	94.1935	56.7742	89.68	89.7436
conserved in all	PF08_0074	DNA/RNA-binding protein Alba, putative		nucleic acid binding (GO:0003676)			0	88.71	83.47	63.2	52.02	77.6
conserved in all	PFD0750w	nuclear cap-binding protein, putative		RNA cap binding (GO:0000339);nucleic acid binding (GO:0003676)	mRNA processing (GO:0006397)	nuclear cap binding complex (GO:0005846)	0	70.42	70.8333	67.49	67.3469	70.16
conserved in all	PFI0820c	RNA-binding protein musashi, putative		nucleic acid binding (GO:0003676)			0	66.7513	74.1117	67.35	72.6804	73.2648
conserved in all	PF07_0054	histone H2B variant, putative		DNA binding (GO:0003677)	chromatin assembly or disassembly (GO:0006333);nucleosome assembly (GO:0006334)	nucleosome (GO:0000786);nucleus (GO:0005634)	0	99.19	99.19	99.19	99.19	99.19
conserved in all	PF10_0169	phosphomannomutase, putative		catalytic activity (GO:0003824);phosphomannomutase activity (GO:0004615)	metabolic process (GO:0008152);GDP-mannose biosynthetic process (GO:0009298);mannose biosynthetic process (GO:0019307)	cytoplasm (GO:0005737)	0	59.92	61.29	63.82	69.51	63.01
conserved in all	PFI0823w	conserved Plasmodium protein, unknown function				membrane (GO:0016020)	0	67.35	67.35	59.18	63.27	67.35
conserved in all	PF08_0073	conserved Plasmodium protein, unknown function		ATP binding (GO:0005524);transferase activity (GO:0016740)			0	79.6438	78.3715	72.0102	57.1111	69.2112
conserved in all	PFD0770c	60S ribosomal protein L15, putative		structural constituent of ribosome (GO:0003735)	translation (GO:0006412)	intracellular (GO:0005622);ribosome (GO:0005840)	0	97.561	98.05	81.4634	94.63	94.63
conserved in all	PF11_0192	histone acetyltransferase, putative		zinc ion binding (GO:0008270);transferase activity, transferring acyl groups other than amino-acyl groups (GO:0016747)	regulation of transcription (GO:0045449)	intracellular (GO:0005622);nucleus (GO:0005634)	0	63.34	64.6003	48.03	61.3115	57.38
conserved in all	PF08_0071	Fe-superoxide dismutase		superoxide dismutase activity (GO:0004784);metal ion binding (GO:0046872)	superoxide metabolic process (GO:0006801);response to oxidative stress (GO:0006979);oxidation reduction (GO:0055114)		0	93.4343	91.92	92.93	90.404	52.22
conserved in all	PFE0845c	60S ribosomal protein L8, putative		structural constituent of ribosome (GO:0003735)	translation (GO:0006412)	intracellular (GO:0005622);ribosome (GO:0005840);large ribosomal subunit (GO:0015934)	0	95	94.62	56.15	73.85	94.62
conserved in all	PF11_0195	conserved Plasmodium protein, unknown function				cytoplasm (GO:0005737);cytoskeleton (GO:0005856)	0	55.1471	58.0402	65.73	43.734	48.08
conserved in all	PFD0785c	conserved Plasmodium protein, unknown function		RNA binding (GO:0003723);helicase activity (GO:0004386);ATP binding (GO:0005524);ATP-dependent helicase activity (GO:0008026)	rRNA processing (GO:0006364);ribosome biogenesis (GO:0042254)	nucleus (GO:0005634)	0	58.29	54.38	52.8846	52.17	52.17
conserved in all	PF10_0174	26s proteasome regulatory subunit p55, putative		endopeptidase activity (GO:0004175)	ubiquitin-dependent protein catabolic process (GO:0006511)	proteasome regulatory particle (GO:0005838)	0	76.45	75.1606	44.54	55.5556	79.66
conserved in all	PF11_0196	conserved Plasmodium protein, unknown function					0	51.6	53.01	48.7903	58.4	53.2
conserved in all	MAL7P1.69	calmodulin, putative		calcium ion binding (GO:0005509)	signal transduction (GO:0007165)		0	68.36	69.5312	63.67	44.92	45.31
conserved in all	PF08_0069	importin beta, putative		binding (GO:0005488);nuclear localization sequence binding (GO:0008139);protein transporter activity (GO:0008565)	protein import into nucleus, docking (GO:0000059);NLS-bearing substrate import into nucleus (GO:0006607);intracellular protein transport (GO:0006886)	nucleus (GO:0005634);nuclear pore (GO:0005643);cytoplasm (GO:0005737)	0	93.0524	91.9134	72.98	72.634	49.56
conserved in all	PFI0845w	conserved Plasmodium membrane protein, unknown function				membrane (GO:0016020);integral to membrane (GO:0016021)	0	68.8235	69.71	61.6519	44.84	55.03
conserved in all	PF07_0057	transcription elongation factor s-II, putative		nucleic acid binding (GO:0003676);DNA binding (GO:0003677);transcription elongation regulator activity (GO:0003711);protein binding (GO:0005515);zinc ion binding (GO:0008270);transcription regulator activity (GO:0030528)	transcription (GO:0006350);regulation of transcription from RNA polymerase II promoter (GO:0006357);regulation of transcription (GO:0045449)	nucleus (GO:0005634);transcription elongation factor complex (GO:0008023)	0	56.26	56.3981	59.26	57.9208	58.17
conserved in all	PFF0840w	conserved Plasmodium protein, unknown function		iron ion binding (GO:0005506);nitrate reductase activity (GO:0008940);electron carrier activity (GO:0009055);molybdenum ion binding (GO:0030151);4 iron, 4 sulfur cluster binding (GO:0051539)	Mo-molybdopterin cofactor biosynthetic process (GO:0006777);transport (GO:0006810);nitrate assimilation (GO:0042128);oxidation reduction (GO:0055114);electron transport (GO:0006118)	periplasmic space (GO:0042597)	0	86.3309	82.7338	79.14	77.7	81.295
conserved in all	PFC0775w	40S ribosomal protein S11, putative		structural constituent of ribosome (GO:0003735)	translation (GO:0006412)	intracellular (GO:0005622);ribosome (GO:0005840);cytosolic small ribosomal subunit (GO:0022627)	0	98.76	98.76	95.6522	96.2733	96.2733
conserved in all	PFB0815w	calcium dependent protein kinase 1		protein kinase activity (GO:0004672);protein serine/threonine kinase activity (GO:0004674);protein tyrosine kinase activity (GO:0004713);calcium ion binding (GO:0005509);ATP binding (GO:0005524);calcium-dependent protein serine/threonine kinase activity (GO:0009931)	protein amino acid phosphorylation (GO:0006468)		0	87.4525	86.88	87.24	62.62	69.89
conserved in all	PFE0865c	splicing factor, putative		nucleic acid binding (GO:0003676)	mRNA processing (GO:0006397);RNA splicing (GO:0008380)	spliceosomal complex (GO:0005681)	0	81.9048	80.5112	82.11	80.27	82.6923
specific to pfal	PFI0850w	conserved Plasmodium protein, unknown function					0	14.15	14.6893	10.22	10.07	13.6659
conserved in all	PF11_0200	U2 snRNP auxiliary factor, small subunit, putative		nucleic acid binding (GO:0003676);RNA binding (GO:0003723);zinc ion binding (GO:0008270)	nuclear mRNA splicing, via spliceosome (GO:0000398)	nucleus (GO:0005634);U2 snRNP (GO:0005686)	0	78.95	77.9935	72.6974	78.62	44.0945
specific to pfal	PFF0845c	erythrocyte membrane protein 1, PfEMP1		receptor activity (GO:0004872);cell adhesion molecule binding (GO:0050839)	pathogenesis (GO:0009405);cell-cell adhesion (GO:0016337);rosetting (GO:0020013);antigenic variation (GO:0020033);cytoadherence to microvasculature, mediated by parasite protein (GO:0020035)	integral to membrane (GO:0016021);host cell plasma membrane (GO:0020002);infected host cell surface knob (GO:0020030)	0	8.50709	8.64662	1.83793	4.59482	5.68087
conserved in all	PFL0895c	conserved Plasmodium protein, unknown function		GTPase activity (GO:0003924);GTP binding (GO:0005525)		cytoplasm (GO:0005737)	0	86.92	86.38	71.606	72.68	67.83
conserved in all	MAL8P1.85	conserved Plasmodium protein, unknown function					0	72.12	72.8395	70.81	75.16	75.78
specific to pfal	PF13_0097	transcription factor with AP2 domain(s), putative		transcription factor activity (GO:0003700)	regulation of transcription, DNA-dependent (GO:0006355)		0	12.2259	12.902	5.12725	6.51	9.95509
conserved in all	PF14_0174	pseudouridine synthase, putative		RNA binding (GO:0003723);pseudouridine synthase activity (GO:0009982)	pseudouridine synthesis (GO:0001522);RNA processing (GO:0006396);RNA modification (GO:0009451)		0	82.49	82.9832	44.6352	61.16	43.38
conserved in all	PF07_0059	4-nitrophenylphosphatase		catalytic activity (GO:0003824);4-nitrophenylphosphatase activity (GO:0003869);hydrolase activity (GO:0016787);phosphatase activity (GO:0016791)	metabolic process (GO:0008152)		0	68.0124	68.6335	63.6646	69.57	49.6104
conserved in all	MAL8P1.83	eukaryotic translation initiation factor, putative		nucleic acid binding (GO:0003676);translation initiation factor activity (GO:0003743)	translation (GO:0006412)		0	85.8736	84.64	76.49	83.46	81.09
conserved in all	PFB0826c	conserved Plasmodium protein, unknown function				nucleus (GO:0005634);cytoplasm (GO:0005737)	0	58.12	57.26	48.51	59.75	53.62
conserved in all	PFI0865w	XPA binding protein 1, putative		nucleotide binding (GO:0000166)			0	69.4823	71.31	40.2235	70.8447	71.2707
conserved in all	PFL0900c	arginyl-tRNA synthetase, putative		nucleotide binding (GO:0000166);aminoacyl-tRNA ligase activity (GO:0004812);arginine-tRNA ligase activity (GO:0004814);ATP binding (GO:0005524)	translation (GO:0006412);tRNA aminoacylation for protein translation (GO:0006418);arginyl-tRNA aminoacylation (GO:0006420)	cytoplasm (GO:0005737);apicoplast (GO:0020011)	0	76.1421	74.62	63.1134	56.6836	60.74
conserved in all	PFB0830w	40S ribosomal protein S26e, putative		structural constituent of ribosome (GO:0003735)	translation (GO:0006412)	intracellular (GO:0005622);mitochondrion (GO:0005739);ribosome (GO:0005840);cytosolic small ribosomal subunit (GO:0022627)	0	99.07	98.1308	95.33	95.33	95.33
conserved in all	PFD0807c	PfMNL-2 CISD1-like iron-sulfur protein, putative		2 iron, 2 sulfur cluster binding (GO:0051537)		intracellular membrane-bounded organelle (GO:0043231)	0	69.6629	69.6629	72.22	62.9213	69.66
conserved in all	MAL13P1.89	conserved Plasmodium protein, unknown function					0	73.0337	73.0337	70.97	71.43	73.63
conserved in all	PF10_0179a	PHF5-like protein, putative					0	98.2	98.2	83.19	97.3	97.3
conserved in all	PF11_0202	clathrin coat assembly protein, putative		protein binding (GO:0005515)	transport (GO:0006810);intracellular protein transport (GO:0006886);vesicle-mediated transport (GO:0016192)	clathrin adaptor complex (GO:0030131)	0	81.69	82.61	82.3394	76.7338	76.2
conserved in all	PFD0810w	small GTP-binding protein sar1		GTP binding (GO:0005525)	intracellular protein transport (GO:0006886);small GTPase mediated signal transduction (GO:0007264)	intracellular (GO:0005622)	0	95.9184	97.92	94.79	94.27	95.31
specific to pfal	PFF0850c	stevor			antigenic variation (GO:0020033)	membrane (GO:0016020);host cell plasma membrane (GO:0020002)	0	8.11688	3.79205	10.93	9.29752	4.42145
conserved in all	PFB0840w	replication factor C, subunit 2		nucleotide binding (GO:0000166);DNA binding (GO:0003677);DNA clamp loader activity (GO:0003689);ATP binding (GO:0005524);nucleoside-triphosphatase activity (GO:0017111)	DNA replication (GO:0006260)	DNA replication factor C complex (GO:0005663)	0	86.97	86.97	82.4242	82.1212	50.91
conserved in all	MAL13P1.92	40S ribosomal protein S15/S19, putative		structural constituent of ribosome (GO:0003735)	translation (GO:0006412)	intracellular (GO:0005622);ribosome (GO:0005840);small ribosomal subunit (GO:0015935);cytosolic small ribosomal subunit (GO:0022627)	0	90.3448	89.6552	86.8966	87.5862	84.83
conserved in all	PFC0800w	band 7-related protein				membrane (GO:0016020)	0	77.39	76.6	60.96	58.12	71.2
conserved in all	MAL7P1.73	calcium/calmodulin-dependent protein kinase, putative		protein kinase activity (GO:0004672);protein serine/threonine kinase activity (GO:0004674);calmodulin-dependent protein kinase activity (GO:0004683);protein tyrosine kinase activity (GO:0004713);calmodulin binding (GO:0005516);ATP binding (GO:0005524)	protein amino acid phosphorylation (GO:0006468);signal transduction (GO:0007165)		0	50.39	51.3725	42.47	46.38	40.85
conserved in all	PFI0880c	glideosome-associated protein 50,secreted acid phosphatase		protein anchor (GO:0043495)		inner membrane complex (GO:0070258)	0	80.81	80.0505	77.2727	79.2929	66.58
conserved in all	PFE0885w	eukaryotic translation initiation factor, putative		nucleic acid binding (GO:0003676);RNA binding (GO:0003723);translation initiation factor activity (GO:0003743)	translational initiation (GO:0006413)		0	81.5642	81.2849	76.68	79.8883	59.4708
conserved in all	MAL7P1.75	mitochondrial ATP synthase F1, epsilon subunit, putative		hydrogen ion transporting ATP synthase activity, rotational mechanism (GO:0046933);proton-transporting ATPase activity, rotational mechanism (GO:0046961)	ATP synthesis coupled proton transport (GO:0015986)	mitochondrial proton-transporting ATP synthase complex, catalytic core F(1) (GO:0000275);mitochondrial proton-transporting ATP synthase complex (GO:0005753)	0	81.6901	85.92	85.92	85.92	85.92
conserved in all	PFF0860c	histone H2A		DNA binding (GO:0003677)	nucleosome assembly (GO:0006334);chromosome organization (GO:0051276)	nucleosome (GO:0000786);nucleus (GO:0005634)	0	97.7444	97.7444	56.82	67.91	97.7444
conserved in all	MAL13P1.95	ferredoxin, putative		electron carrier activity (GO:0009055);iron-sulfur cluster binding (GO:0051536);2 iron, 2 sulfur cluster binding (GO:0051537)	electron transport chain (GO:0022900);electron transport (GO:0006118)	apicoplast (GO:0020011)	0	61.3065	59.2965	59.7938	61.86	62.89
conserved in all	PFI0890c-b	organelle ribosomal protein L3 precursor, putative		structural constituent of ribosome (GO:0003735)	translation (GO:0006412)	intracellular (GO:0005622);ribosome (GO:0005840)	0	78.5489	80.13	47.6341	68.45	64.2633
conserved in all	PF07_0063	conserved Plasmodium protein, unknown function		DNA binding (GO:0003677);nucleotidyltransferase activity (GO:0016779)			0	84.03	85.7143	83.1933	82.5	82.5
conserved in all	MAL8P1.81	flavoprotein, putative		catalytic activity (GO:0003824);phosphopantothenoylcysteine decarboxylase activity (GO:0004633)			0	58.0808	61.0526	67.03	70.8108	70.81
conserved in all	PFD0825c	RNA binding protein Puf2		RNA binding (GO:0003723);binding (GO:0005488)	negative regulation of translation (GO:0017148)		0	58.06	56.12	42.3598	62.65	63.3
conserved in all	PFI0895c	eukaryotic translation initiation factor 3 subunit 5, putative		translation initiation factor activity (GO:0003743)	translation (GO:0006412);regulation of translational initiation (GO:0006446)		0	84.0625	82.5	44.0625	62.54	69.06
conserved in all	PFE0900w	conserved protein, unknown function		ubiquitin-protein ligase activity (GO:0004842)	protein ubiquitination (GO:0016567)	ubiquitin ligase complex (GO:0000151);nucleus (GO:0005634);cytoplasm (GO:0005737)	0	69.37	69.74	71.85	69.63	72.96
conserved in all	PFB0865w	small nuclear ribonucleoprotein, putative			RNA splicing, via transesterification reactions (GO:0000375);RNA splicing (GO:0008380)	spliceosomal complex (GO:0005681)	0	94.06	94.06	95.05	92.08	87.13
conserved in all	PF08_0064	vacuolar protein-sorting protein VPS2, putative			protein transport (GO:0015031)		0	60.85	57.6744	76.1905	75.24	49.29
conserved in all	PFF0865w	histone H3 variant, putative		DNA binding (GO:0003677)	nucleosome assembly (GO:0006334);chromosome organization (GO:0051276)	nucleosome (GO:0000786);nucleus (GO:0005634)	0	100	99.2647	49.64	50.36	100
conserved in all	PFD0830w	bifunctional dihydrofolate reductase-thymidylate synthase		dihydrofolate reductase activity (GO:0004146);thymidylate synthase activity (GO:0004799);NADP or NADPH binding (GO:0050661)	dTMP biosynthetic process (GO:0006231);glycine biosynthetic process (GO:0006545);one-carbon metabolic process (GO:0006730);nucleotide biosynthetic process (GO:0009165);oxidation reduction (GO:0055114)		0	71.36	70.55	53.62	62.74	70.81
absent in pkno	PF14_0177b	conserved Plasmodium protein, unknown function					0	74.31	14.48	75.69	77.78	78.4722
conserved in all	MAL8P1.79	conserved Plasmodium protein, unknown function		calcium ion binding (GO:0005509)			0	66.95	66.52	61.29	62.55	63.24
conserved in all	PFE0910w	conserved Plasmodium protein, unknown function		protein binding (GO:0005515)	transcription (GO:0006350);regulation of transcription, DNA-dependent (GO:0006355);chromatin modification (GO:0016568)	nucleus (GO:0005634)	0	67.18	67.1429	62.6	63.36	52.6718
absent in pkno	PF14_0178	ubiquitin fusion degradation protein UFD1, putative		ATPase activity (GO:0016887)	ubiquitin-dependent protein catabolic process (GO:0006511);regulation of cell cycle process (GO:0010564);ER-associated protein catabolic process (GO:0030433)	endoplasmic reticulum (GO:0005783);membrane (GO:0016020)	0	76.73	11.8797	84.4	80.85	80.85
conserved in all	PFE0915c	proteasome subunit beta type 1, putative		endopeptidase activity (GO:0004175);threonine-type endopeptidase activity (GO:0004298)	ubiquitin-dependent protein catabolic process (GO:0006511);proteolysis involved in cellular protein catabolic process (GO:0051603)	proteasome core complex (GO:0005839)	0	81.7427	81.7427	76.86	78.93	64.88
conserved in all	MAL8P1.78	small heat shock protein, putative			response to unfolded protein (GO:0006986);response to heat (GO:0009408)		0	83.14	77.095	53.49	83.14	82.56
conserved in all	PFB0875c	chromatin-binding protein, putative		protein binding (GO:0005515)	nuclear mRNA splicing, via spliceosome (GO:0000398)	nucleus (GO:0005634);spliceosomal complex (GO:0005681)	0	69.54	72.23	51.134	71.3992	46.7554
conserved in all	PFF0880c	conserved Plasmodium protein, unknown function					0	67.1498	69.0821	63.4146	41.9512	62.93
conserved in all	MAL8P1.77	conserved Plasmodium protein, unknown function			transport (GO:0006810);ER to Golgi vesicle-mediated transport (GO:0006888)	intracellular (GO:0005622);endoplasmic reticulum (GO:0005783);Golgi apparatus (GO:0005794)	0	66.4336	69.9301	71.33	72.03	61.54
specific to pfal	PFL0935c	erythrocyte membrane protein 1, PfEMP1		receptor activity (GO:0004872);host cell surface receptor binding (GO:0046789);cell adhesion molecule binding (GO:0050839)	pathogenesis (GO:0009405);cell-cell adhesion (GO:0016337);rosetting (GO:0020013);antigenic variation (GO:0020033);cytoadherence to microvasculature, mediated by parasite protein (GO:0020035)	integral to membrane (GO:0016021);host cell plasma membrane (GO:0020002);infected host cell surface knob (GO:0020030)	0	7.47788	8.7766	5.80674	6.78191	6.52
conserved in all	MAL8P1.76	meiotic recombination protein dmc1-like protein		nucleotide binding (GO:0000166);DNA binding (GO:0003677);protein binding (GO:0005515);ATP binding (GO:0005524);DNA-dependent ATPase activity (GO:0008094)	DNA metabolic process (GO:0006259);reciprocal meiotic recombination (GO:0007131)	condensed nuclear chromosome (GO:0000794);intracellular (GO:0005622);nucleus (GO:0005634)	0	90.49	88.7608	54.18	88.7608	81.56
conserved in all	PFB0885w	40S ribosomal protein S30, putative		structural constituent of ribosome (GO:0003735)	translation (GO:0006412)	intracellular (GO:0005622);mitochondrion (GO:0005739);ribosome (GO:0005840);cytosolic small ribosomal subunit (GO:0022627)	0	87.931	87.931	82.76	84.4828	84.48
conserved in all	PF08_0062	adenylate kinase 2		ATP binding (GO:0005524);nucleobase, nucleoside, nucleotide kinase activity (GO:0019205)	nucleobase, nucleoside, nucleotide and nucleic acid metabolic process (GO:0006139)		0	41.99	42.18	45.6081	46.62	45.03
conserved in all	PFF0895w	malate dehydrogenase		catalytic activity (GO:0003824);binding (GO:0005488);oxidoreductase activity (GO:0016491);malate dehydrogenase activity (GO:0016615);oxidoreductase activity, acting on the CH-OH group of donors, NAD or NADP as acceptor (GO:0016616)	carbohydrate metabolic process (GO:0005975);glycolysis (GO:0006096);tricarboxylic acid cycle (GO:0006099);metabolic process (GO:0008152);cellular carbohydrate metabolic process (GO:0044262)	cytosol (GO:0005829)	0	72.8435	73.4824	41.5335	69.97	64.86
conserved in all	MAL7P1.78	conserved Plasmodium protein, unknown function		RNA polymerase II transcription factor activity (GO:0003702)	transcription (GO:0006350);regulation of transcription, DNA-dependent (GO:0006355);transcription initiation from RNA polymerase II promoter (GO:0006367)	nucleus (GO:0005634);transcription factor TFIIA complex (GO:0005672)	0	59.8985	59.9	52.26	57.79	59.3
absent in pkno	PF14_0180	conserved Plasmodium protein, unknown function					0	48.5207	7.3922	40	54.12	55.29
conserved in all	PFI0930c	nucleosome assembly protein		DNA binding (GO:0003677);histone binding (GO:0042393)	nucleosome assembly (GO:0006334)	nucleus (GO:0005634);cytoplasm (GO:0005737)	0	84.38	83.92	46.2	46.8401	81.11
conserved in all	PFE0950c	conserved Plasmodium protein, unknown function				cytoplasm (GO:0005737)	0	46.41	50	47.76	46.1538	48.5
conserved in all	PF10_0187	60S ribosomal protein L30e, putative		structural constituent of ribosome (GO:0003735)	translation (GO:0006412)	intracellular (GO:0005622);ribosome (GO:0005840);cytosolic large ribosomal subunit (GO:0022625)	0	99.0741	99.0741	97.2222	96.3	96.3
conserved in all	PFI0935w	DnaJ protein, putative		heat shock protein binding (GO:0031072);unfolded protein binding (GO:0051082)	protein folding (GO:0006457)		0	80.9524	79.1005	79.09	60	76.82
conserved in all	MAL7P1.81	eukaryotic translation initiation factor 3 37.28 kDa subunit, putative		translation initiation factor activity (GO:0003743)	regulation of translational initiation (GO:0006446)	eukaryotic translation initiation factor 3 complex (GO:0005852)	0	86.8502	85.63	43.1193	78.49	87.77
conserved in all	PFC0835c	conserved protein, unknown function				membrane (GO:0016020);integral to membrane (GO:0016021)	0	53.6264	57.047	56.82	55.23	55.8
conserved in all	PFE0955w	conserved Plasmodium protein, unknown function		RNA binding (GO:0003723)	mRNA processing (GO:0006397)	nucleus (GO:0005634);cytoplasm (GO:0005737)	0	43.24	45.58	44	46.26	45.45
conserved in all	PF11_0215	conserved Plasmodium protein, unknown function				cytoplasm (GO:0005737);integral to membrane (GO:0016021)	0	54.7619	57.65	62.6506	60.241	57.8313
conserved in all	PFI0940c	PPPDE peptidase, putative					0	60	59.2	56.4	49.6	58
conserved in all	PFE0960w	mitochondrial ribosomal protein L14 precursor, putative		structural constituent of ribosome (GO:0003735)	translation (GO:0006412)	intracellular (GO:0005622);ribosome (GO:0005840)	0	89.52	89.52	93.55	94.3548	95.1613
conserved in all	PF07_0070	drug metabolite transporter, putative		transporter activity (GO:0005215)	transport (GO:0006810)	membrane (GO:0016020)	0	82.61	81.68	44.7205	49.848	67.1733
conserved in all	PFE0965c	vacuolar ATP synthetase		hydrogen ion transmembrane transporter activity (GO:0015078);proton-transporting ATPase activity, rotational mechanism (GO:0046961)	hydrogen transport (GO:0006818);ATP synthesis coupled proton transport (GO:0015986)	membrane (GO:0016020);proton-transporting V-type ATPase, V0 domain (GO:0033179)	0	92.17	92.17	89.16	79.19	89.09
conserved in all	PF11_0217	conserved Plasmodium membrane protein, unknown function		zinc ion binding (GO:0008270);acyltransferase activity (GO:0008415)		integral to membrane (GO:0016021)	0	69.9659	70.9898	58.7	64.51	66.33
conserved in all	PFL0955c	raf kinase inhibitor		phosphatidylethanolamine binding (GO:0008429);protein kinase regulator activity (GO:0019887)			0	72.77	72.2513	76.8421	78.4211	77.8947
conserved in all	PFI0945w	thioredoxin, putative					0	82.6923	82.6923	59.62	84.5411	83.5749
conserved in all	PFL0957w	conserved Plasmodium protein, unknown function				plasma membrane (GO:0005886);integral to membrane (GO:0016021)	0	77.36	77.36	73.58	56.6	46.3
conserved in all	PFI0950w	protein disulfide isomerase					0	58.8	60.35	60.8527	57.09	54.6
conserved in all	PFL0960w	D-ribulose-5-phosphate 3-epimerase, putative		catalytic activity (GO:0003824);ribulose-phosphate 3-epimerase activity (GO:0004750)	carbohydrate metabolic process (GO:0005975);metabolic process (GO:0008152);pentose-phosphate shunt, non-oxidative branch (GO:0009052)		0	86.7841	84.5815	87.67	86.7841	87.67
conserved in all	MAL7P1.83	conserved Plasmodium protein, unknown function					0	41.5401	43.2787	44.15	40.31	41.53
conserved in all	PFE0975c	40S ribosomal protein S24, putative		structural constituent of ribosome (GO:0003735)	translation (GO:0006412)	intracellular (GO:0005622);ribosome (GO:0005840)	0	89.4737	88.7218	70.68	87.22	87.22
conserved in all	PFC0845c	ubiquitin-protein ligase, putative		ubiquitin-protein ligase activity (GO:0004842);protein binding (GO:0005515);zinc ion binding (GO:0008270)	ubiquitin-dependent protein catabolic process (GO:0006511)	ubiquitin ligase complex (GO:0000151);apicoplast (GO:0020011)	0	80.56	80.56	85.9813	85.9813	87.8505
conserved in all	PF08_0059	protein kinase c inhibitor-like protein, putative		catalytic activity (GO:0003824);protein kinase C inhibitor activity (GO:0008426)			0	71.8919	70.8108	46.19	73.12	69.89
conserved in all	PFL0970w	pre-mRNA splicing factor, putative			RNA splicing, via transesterification reactions (GO:0000375)	spliceosomal complex (GO:0005681)	0	71.84	72.1959	58.1662	50.88	43.4646
conserved in all	PFC0855w	ubiquitin conjugating enzyme, putative		ubiquitin-protein ligase activity (GO:0004842);small conjugating protein ligase activity (GO:0019787)	post-translational protein modification (GO:0043687);regulation of protein metabolic process (GO:0051246);ubiquitin cycle (GO:0006512)		0	90	88.75	85	84.38	49.09
conserved in all	MAL7P1.86	transcription initiation factor IIE, alpha subunit, putative		RNA polymerase II transcription factor activity (GO:0003702)	transcription initiation from RNA polymerase II promoter (GO:0006367)	transcription factor TFIIE complex (GO:0005673)	0	60.05	59.1371	64.97	65.9	58.88
specific to pfal	PF10_0190	conserved Plasmodium protein, unknown function		extracellular matrix structural constituent (GO:0005201)	phosphate transport (GO:0006817);cell adhesion (GO:0007155)	extracellular region (GO:0005576);collagen (GO:0005581);cytoplasm (GO:0005737)	0	12.6512	13.5734	8.94	9.4329	14.21
conserved in all	PF10_0193	microtubule-associated protein 1 light chain 3, putative					0	88.71	88.71	89.52	87.9032	87.9032
conserved in all	PF07_0072	calcium dependent protein kinase 4		catalytic activity (GO:0003824);protein kinase activity (GO:0004672);protein serine/threonine kinase activity (GO:0004674);protein tyrosine kinase activity (GO:0004713);calcium-dependent protein serine/threonine phosphatase activity (GO:0004723);calcium ion binding (GO:0005509);ATP binding (GO:0005524)	protein amino acid phosphorylation (GO:0006468)		0	92.44	92.44	49.631	72.5724	91.86
conserved in all	PFC0865w	RNA binding protein, putative		nucleic acid binding (GO:0003676);RNA binding (GO:0003723)			0	58.23	58.58	50.65	53.72	54.19
conserved in all	PF10_0195a	flagellar outer arm dynein-associated protein, putative					0	92.16	92.08	85.15	84.16	83.3333
conserved in all	PF08_0057	conserved Plasmodium protein, unknown function		nucleotide binding (GO:0000166);metal ion binding (GO:0046872)			0	66.67	72.2222	68.5185	72.22	70.37
conserved in all	MAL8P1.72	high mobility group protein		DNA binding (GO:0003677);DNA bending activity (GO:0008301)	positive regulation of cytokine production involved in immune response (GO:0002720);regulation of transcription from RNA polymerase III promoter (GO:0006359);regulation of transcription (GO:0045449)	nucleus (GO:0005634);chromosome (GO:0005694);cytosol (GO:0005829)	0	89.9	86.87	86.87	87.88	87.88
conserved in all	PF14_0191	conserved Plasmodium protein, unknown function				nucleus (GO:0005634);cytoplasm (GO:0005737)	0	74.2633	72.3	59.14	47.25	65.03
specific to pfal	MAL13P1.106	probable protein, unknown function					0	1.07741	1.9685	8.26087	2.66272	7.53564
conserved in all	PF14_0192	glutathione reductase		glutathione-disulfide reductase activity (GO:0004362);oxidoreductase activity (GO:0016491);FAD binding (GO:0050660)	response to oxidative stress (GO:0006979);cell redox homeostasis (GO:0045454)	cytoplasm (GO:0005737)	0	77.18	78.45	62.2	59.28	80
specific to primate	PFC0875w	ABC transporter, putative		nucleotide binding (GO:0000166);ATP binding (GO:0005524);ATPase activity (GO:0016887);nucleoside-triphosphatase activity (GO:0017111)	transport (GO:0006810)	integral to membrane (GO:0016021)	0	43.6	45.12	10.5632	8.14508	9.52229
conserved in all	PFD0880w	golgi organization and biogenesis factor, putative			proteasome assembly (GO:0043248)		0	77.8802	77.8802	50.82	78.1106	50.35
conserved in all	PFE1005w	40S ribosomal protein S9, putative		RNA binding (GO:0003723);structural constituent of ribosome (GO:0003735);rRNA binding (GO:0019843)	translation (GO:0006412)	intracellular (GO:0005622);small ribosomal subunit (GO:0015935)	0	95.77	96.83	80.4233	92.59	63.2
conserved in all	PF14_0194	spliceosome-associated protein, putative		nucleic acid binding (GO:0003676)	RNA splicing, via transesterification reactions (GO:0000375);RNA splicing (GO:0008380)	spliceosomal complex (GO:0005681)	0	60.12	60.95	58.44	45.88	62.4742
conserved in all	MAL8P1.69	14-3-3 protein, putative		protein domain specific binding (GO:0019904)			0	98.47	98.4733	60.8	67.94	98.4733
conserved in all	PFL1005c	heterochromatin protein 1		DNA binding (GO:0003677);chromatin binding (GO:0003682)	DNA methylation (GO:0006306);chromatin assembly or disassembly (GO:0006333)	chromatin (GO:0000785);nucleus (GO:0005634)	0	78.91	76	70.4	67.9715	43.75
specific to pfal	PFB0932w	Plasmodium exported protein (hyp9), unknown function		nucleotide binding (GO:0000166)		membrane (GO:0016020)	0	11.4525	14.29	4.37	7.54	7.94
conserved in all	PFC0886w	conserved Plasmodium protein, unknown function					0	81.94	80	44.44	79.17	79.86
conserved in all	MAL13P1.111	ATP-dependent Clp protease adaptor protein ClpS, putative			protein catabolic process (GO:0030163)		0	57.87	58.29	57.732	60.31	58.46
conserved in all	MAL8P1.67	nucleolar preribosomal assembly protein, putative					0	79.798	79.8	68.69	78.5366	77.25
conserved in all	PFD0895c	Bet3 transport protein, putative		transporter activity (GO:0005215)	ER to Golgi vesicle-mediated transport (GO:0006888)		0	90.91	91.98	83.96	86.1	81.2834
conserved in all	PFI1005w	ADP-ribosylation factor, putative		GTP binding (GO:0005525)	small GTPase mediated signal transduction (GO:0007264)	intracellular (GO:0005622)	0	78.0105	76.44	70.16	69.6335	58.12
conserved in all	PFC0900w	T-complex protein 1 epsilon subunit, putative		protein binding (GO:0005515);ATP binding (GO:0005524);unfolded protein binding (GO:0051082)	protein folding (GO:0006457);cellular protein metabolic process (GO:0044267)	chaperonin-containing T-complex (GO:0005832)	0	94.21	93.271	65.23	82.0702	51.76
conserved in all	PF10_0203	ADP-ribosylation factor		GTP binding (GO:0005525)	protein amino acid ADP-ribosylation (GO:0006471);intracellular protein transport (GO:0006886);small GTPase mediated signal transduction (GO:0007264);protein transport (GO:0015031)	intracellular (GO:0005622)	0	98.9	98.9	55.8011	80.77	99.45
conserved in all	PF13_0119	Rab GTPase 11a		GTPase activity (GO:0003924);protein binding (GO:0005515);GTP binding (GO:0005525)	intracellular protein transport (GO:0006886);nucleocytoplasmic transport (GO:0006913);signal transduction (GO:0007165);small GTPase mediated signal transduction (GO:0007264);protein transport (GO:0015031);regulation of vesicle-mediated transport (GO:0060627)	intracellular (GO:0005622);membrane (GO:0016020);recycling endosome (GO:0055037)	0	94.91	94.91	83.8	93.52	92.59
conserved in all	PF10_0204	conserved Plasmodium protein, unknown function		glutaminyl-tRNA synthase (glutamine-hydrolyzing) activity (GO:0050567)	translation (GO:0006412)		0	70.54	71.95	66.39	74.79	71.71
conserved in all	PFD0910w	conserved Plasmodium protein, unknown function				cytoplasm (GO:0005737);membrane (GO:0016020)	0	65.6827	66.4207	53.87	67.92	64.26
conserved in all	PFI1020c	inosine-5'-monophosphate dehydrogenase		catalytic activity (GO:0003824);IMP dehydrogenase activity (GO:0003938)	oxidation reduction (GO:0055114)		0	88.24	87.8431	58.0271	57.09	76.36
specific to pfal	PFB0953w	Plasmodium exported protein (hyp15), unknown function				integral to membrane (GO:0016021)	0	7.77	9.71	12.5954	6.43985	9.71
conserved in all	PF13_0121	dihydrolipamide succinyltransferase component of 2-oxoglutarate dehydrogenase complex		dihydrolipoyllysine-residue succinyltransferase activity (GO:0004149);acyltransferase activity (GO:0008415)	tricarboxylic acid cycle (GO:0006099);2-oxoglutarate metabolic process (GO:0006103);metabolic process (GO:0008152)	mitochondrion (GO:0005739);oxoglutarate dehydrogenase complex (GO:0045252)	0	73.8717	72.209	70.5463	71.3948	69.27
conserved in all	PFE1050w	adenosylhomocysteinase,S-adenosyl-L-homocysteine hydrolase		catalytic activity (GO:0003824);adenosylhomocysteinase activity (GO:0004013);binding (GO:0005488)	one-carbon metabolic process (GO:0006730);metabolic process (GO:0008152)		0	88.94	88.1002	82.2917	73.5417	83.3333
conserved in all	PFI1030c-b	ubiquitin conjugating enzyme, putative		small conjugating protein ligase activity (GO:0019787)	post-translational protein modification (GO:0043687);regulation of protein metabolic process (GO:0051246)		0	92.64	91.411	58.28	84.0491	92.02
conserved in all	PFF1010c	DnaJ protein, putative		heat shock protein binding (GO:0031072)			0	56.63	59.67	64.4737	66.04	64.99
specific to pfal	PFB0955w	stevor				membrane (GO:0016020);Maurer's cleft (GO:0020036)	0	5.65878	4.57627	11.9086	4.58069	12.6154
conserved in all	PFD0930w	CGI-141 protein homolog, putative			vesicle-mediated transport (GO:0016192)		0	69.8529	70.59	66.18	45.5882	67.65
conserved in all	PF10_0207	conserved Plasmodium membrane protein, unknown function				membrane (GO:0016020);apicoplast (GO:0020011)	0	58.6433	57.8947	40.31	60.44	53.3
conserved in all	PFL1040w	conserved Plasmodium protein, unknown function				nucleus (GO:0005634)	0	46.74	49.1304	49.7826	40.94	50.3254
conserved in all	PF10_0208	endomembrane protein 70, putative				integral to membrane (GO:0016021)	0	67.5347	70.9964	44.9438	63.46	67.03
conserved in all	PF14_0774	mannose-1-phosphate guanyltransferase, putative		transferase activity (GO:0016740);nucleotidyltransferase activity (GO:0016779)	biosynthetic process (GO:0009058)		0	75.74	75.67	43.2941	56.76	66.91
conserved in all	PF14_0202	dynein-associated protein, putative					0	60.7004	61.87	60.47	53.1008	57.36
conserved in all	PFC0915w	ATP-dependent RNA helicase, putative		nucleic acid binding (GO:0003676);ATP-dependent RNA helicase activity (GO:0004004);helicase activity (GO:0004386);ATP binding (GO:0005524);ATP-dependent helicase activity (GO:0008026)			0	94.023	93.5632	95.1501	76.9053	62.44
conserved in all	PF10_0210	deoxyribose-phosphate aldolase, putative		deoxyribose-phosphate aldolase activity (GO:0004139);lyase activity (GO:0016829)	pentose-phosphate shunt (GO:0006098);deoxyribonucleotide catabolic process (GO:0009264)	cytoplasm (GO:0005737)	0	73.384	71.4829	73.0038	53.58	72.6236
conserved in all	PFL1050w	conserved Plasmodium protein, unknown function		peptidyl-prolyl cis-trans isomerase activity (GO:0003755)	protein folding (GO:0006457);cell cycle (GO:0007049);protein transport (GO:0015031);cell division (GO:0051301)	apicoplast (GO:0020011)	0	59.01	57.92	54.3811	43.12	56.65
conserved in all	PFF1025c	SNO glutamine amidotransferase family protein		catalytic activity (GO:0003824);glutaminase activity (GO:0004359)	response to singlet oxygen (GO:0000304);metabolic process (GO:0008152);pyridoxine biosynthetic process (GO:0008615);vitamin B6 biosynthetic process (GO:0042819)	cytosol (GO:0005829)	0	85.43	85.7616	83.7748	83.88	74.43
conserved in all	PFC0920w	histone H2A variant, putative		DNA binding (GO:0003677)	chromatin assembly or disassembly (GO:0006333);nucleosome assembly (GO:0006334)	nucleosome (GO:0000786);nucleus (GO:0005634)	0	97.47	97.47	70.2532	96.2025	96.84
conserved in all	PFI1045w	conserved Plasmodium protein, unknown function				cytoplasm (GO:0005737)	0	75.1	74.46	64.2	77.78	42.83
specific to pfal	PFB0973c	hypothetical protein		zinc ion binding (GO:0008270);hydrolase activity (GO:0016787)		cytoplasm (GO:0005737)	0	2.15343	0.946186	1.15646	7.05882	1.47783
specific to pfal	PFB0974c	erythrocyte membrane protein 1 (PfEMP1), truncated, degenerate					0	11.7284	0.312305	1.11111	4.69208	0.818094
specific to pfal	PFB0975c	erythrocyte membrane protein 1 (PfEMP1), truncated		receptor activity (GO:0004872)	pathogenesis (GO:0009405)	integral to membrane (GO:0016021)	0	1.47479	7.62712	2.13244	4.83871	7.97342
conserved in all	MAL13P1.115	conserved protein, unknown function		zinc ion binding (GO:0008270)		nucleus (GO:0005634)	0	89.7436	85.9	83.3333	83.3333	83.33
absent in pkno	MAL7P1.93	mitochondrial ribosomal protein S8 precursor, putative		structural constituent of ribosome (GO:0003735)	translation (GO:0006412)	intracellular (GO:0005622);mitochondrial small ribosomal subunit (GO:0005763);ribosome (GO:0005840)	0	96.9	3.12139	67.6923	97.6744	96.9
conserved in all	PFD0950w	ran binding protein 1, putative		GTPase activity (GO:0003924);GTP binding (GO:0005525)	DNA replication (GO:0006260);intracellular transport (GO:0046907)		0	72.45	71.88	66.9	61.57	75.18
absent in pkno	MAL7P1.94	prefoldin subunit 3, putative		unfolded protein binding (GO:0051082)	protein folding (GO:0006457);'de novo' protein folding (GO:0006458)	prefoldin complex (GO:0016272)	0	75.5208	11.1111	43.23	74.48	60.94
conserved in all	PFF1040w	conserved Plasmodium protein, unknown function		catalytic activity (GO:0003824)		cytoplasm (GO:0005737)	0	42.2	44.8276	47.7528	50.14	41.69
conserved in all	PFI1065c	conserved Plasmodium protein, unknown function		nucleotide binding (GO:0000166)		cytoplasm (GO:0005737);apicoplast (GO:0020011)	0	56.55	56.7753	60.46	46.57	56.59
specific to primate	MAL13P1.116	conserved Plasmodium membrane protein, unknown function					0	42.9	42.6631	9.16	5.13433	11.5224
conserved in all	MAL8P1.62	conserved Plasmodium protein, unknown function				membrane (GO:0016020)	0	62.23	64.62	57.04	54.1516	58.63
specific to pfal	PFB1005w	rifin			antigenic variation (GO:0020033)	membrane (GO:0016020);host cell plasma membrane (GO:0020002)	0	8.01001	0	6.84474	1.48256	0
conserved in all	MAL13P1.117	DHHC-type zinc finger protein, putative		zinc ion binding (GO:0008270)			0	69.9681	69.97	58.47	61.46	61.15
conserved in all	PFI1080w	dynein intermediate chain 2, ciliary					0	61.73	60.27	42.3171	58.7805	59.64
conserved in all	PF14_0787	conserved Plasmodium protein, unknown function					0	88.4211	89.4737	84.95	80.65	79.57
specific to pfal	PFB1010w	rifin			antigenic variation (GO:0020033)	host cell plasma membrane (GO:0020002)	0	1.79348	11.0512	8.54214	6.21866	13.8587
conserved in all	PFF1050w	nascent polypeptide associated complex alpha chain, putative			'de novo' cotranslational protein folding (GO:0051083)	nascent polypeptide-associated complex (GO:0005854)	0	79.8913	82.07	74.05	76.63	77.17
conserved in all	PF14_0212	mitochondrial ribosomal protein L21 precursor, putative		RNA binding (GO:0003723);structural constituent of ribosome (GO:0003735)	translation (GO:0006412)	intracellular (GO:0005622);ribosome (GO:0005840)	0	62.8571	62.99	65	67.37	66.41
conserved in all	MAL7P1.99	conserved Plasmodium protein, unknown function				membrane (GO:0016020)	0	71.5084	72.067	71.5084	69.27	70.95
conserved in all	MAL7P1.98	conserved Plasmodium protein, unknown function					0	41.6216	44.8649	43.14	55.37	53.67
specific to pfal	PFB1015w	rifin			antigenic variation (GO:0020033)	host cell plasma membrane (GO:0020002)	0	3.04054	0	9.79167	10.1449	7.91139
specific to pfal	PFB1020w	stevor		catalytic activity (GO:0003824)		membrane (GO:0016020)	0	3.64851	12.1406	14.1447	13.3333	8.08511
conserved in all	PFL1080c	ATP-binding protein, putative					0	69.62	72.4806	74.09	75.3	50.81
specific to pfal	PFB1025w	erythrocyte membrane protein 1 (PfEMP1), truncated, degenerate					0	0	7.14286	0	6.23306	0
specific to pfal	PFB1030w	conserved Plasmodium falciparum protein family					0	2.18304	1.16429	10.4027	7.20721	2.79525
conserved in all	PFI1090w	S-adenosylmethionine synthetase		methionine adenosyltransferase activity (GO:0004478);ATP binding (GO:0005524);phosphate binding (GO:0042301);protein homodimerization activity (GO:0042803);ADP binding (GO:0043531);metal ion binding (GO:0046872)	S-adenosylmethionine biosynthetic process (GO:0006556);one-carbon metabolic process (GO:0006730)		0	90.3	90.05	63.5468	40.78	90.55
specific to pfal	PFB1040w	rifin			antigenic variation (GO:0020033)	host cell plasma membrane (GO:0020002)	0	4.25676	3.58767	2.83371	7.12329	9.48419
conserved in all	PF13_0124	SFT2-like protein, putative				membrane (GO:0016020)	0	77.4809	76.34	55.6	71.4829	57.79
specific to pfal	PFL1075w	transcription factor with AP2 domain(s), putative		transcription factor activity (GO:0003700)	regulation of transcription, DNA-dependent (GO:0006355)		0	12.8276	13.9966	4.84375	7.93279	10.6724
specific to pfal	PFB1045w	erythrocyte membrane protein 1 (PfEMP1), truncated					0	7.17336	7.02087	9.98	10.2088	13.92
conserved in all	PFF1080w	conserved Apicomplexan protein, unknown function		hydrolase activity (GO:0016787)			0	54.69	59.38	60.94	58.14	59.38
specific to pfal	PFB1050w	rifin			antigenic variation (GO:0020033)	membrane (GO:0016020);host cell plasma membrane (GO:0020002)	0	9.79	7.49698	3.83004	0	7.86082
conserved in all	PFI1105w	phosphoglycerate kinase		phosphoglycerate kinase activity (GO:0004618)	glycolysis (GO:0006096)		0	88.4615	90.1442	82.4519	63.54	65.4846
conserved in all	PF07_0079	60S ribosomal protein L11a, putative		structural constituent of ribosome (GO:0003735)	translation (GO:0006412)	intracellular (GO:0005622);ribosome (GO:0005840);cytosolic large ribosomal subunit (GO:0022625)	0	94.8	94.22	95.9538	95.9538	89.4444
conserved in all	PFF1085a	conserved Plasmodium protein, unknown function		ubiquinol-cytochrome-c reductase activity (GO:0008121)	mitochondrial electron transport, ubiquinol to cytochrome c (GO:0006122)	mitochondrial envelope (GO:0005740)	0	87.5	86.46	65.62	88.5417	54.17
conserved in all	PF07_0080	40S ribosomal protein S10, putative		structural constituent of ribosome (GO:0003735)	translation (GO:0006412)	cytosolic small ribosomal subunit (GO:0022627)	0	89.0511	88.3212	88.3212	87.5912	69.281
conserved in all	PFI1110w	glutamine synthetase, putative		glutamate-ammonia ligase activity (GO:0004356)	glutamine biosynthetic process (GO:0006542);nitrogen compound metabolic process (GO:0006807)		0	74.2173	73.3	40.52	58.59	52.02
specific to pfal	PFB1055c	erythrocyte membrane protein 1, PfEMP1		receptor activity (GO:0004872);host cell surface receptor binding (GO:0046789);cell adhesion molecule binding (GO:0050839)	pathogenesis (GO:0009405);cell-cell adhesion (GO:0016337);rosetting (GO:0020013);antigenic variation (GO:0020033);cytoadherence to microvasculature, mediated by parasite protein (GO:0020035)	integral to membrane (GO:0016021);host cell plasma membrane (GO:0020002);infected host cell surface knob (GO:0020030)	0	9.49977	8.63574	4.5	10.19	8.96
conserved in all	PF07_0081	conserved Plasmodium protein, unknown function				apicoplast (GO:0020011)	0	50.11	51.86	56.3025	58.81	50.22
conserved in all	PFC0975c	peptidyl-prolyl cis-trans isomerase		peptidyl-prolyl cis-trans isomerase activity (GO:0003755);cyclosporin A binding (GO:0016018)	protein folding (GO:0006457)	cytosol (GO:0005829)	0	90.06	90.06	47.98	90.06	89.4737
conserved in all	PF14_0222	ankyrin, putative					0	43.7186	43.42	50.25	42.3986	44.43
conserved in all	MAL7P1.104	3'-5' exoribonuclease Csl4 homolog, putative		3'-5'-exoribonuclease activity (GO:0000175);7S RNA binding (GO:0008312)	rRNA processing (GO:0006364)	exosome (RNase complex) (GO:0000178)	0	55.3846	55.3846	47.5	59.5	60
conserved in all	MAL8P1.56	conserved Plasmodium membrane protein, unknown function				membrane (GO:0016020)	0	66.3736	68.1319	63.956	63.956	61.76
specific to pfal	PFL1085w	transcription factor with AP2 domain(s), putative		transcription factor activity (GO:0003700)	regulation of transcription, DNA-dependent (GO:0006355)		0	12.0035	14.2588	5.39	5.18	14.7615
conserved in all	PF07_0084	conserved Plasmodium protein, unknown function				cytoplasm (GO:0005737)	0	67.77	67.77	63.6364	76.0331	76.0331
conserved in all	PF14_0223	cyclophilin, putative		peptidyl-prolyl cis-trans isomerase activity (GO:0003755);cyclosporin A binding (GO:0016018)			0	49.79	55.93	51.89	54.59	52.74
conserved in all	PFL1115w	conserved Plasmodium protein, unknown function			mRNA export from nucleus (GO:0006406);protein export from nucleus (GO:0006611);nuclear envelope organization (GO:0006998);protein transport (GO:0015031);mRNA transport (GO:0051028)	nucleus (GO:0005634);nuclear envelope (GO:0005635);endoplasmic reticulum (GO:0005783);integral to membrane (GO:0016021)	0	59.19	59.48	48.25	59.0414	50.65
conserved in all	PF08_0045	2-oxoglutarate dehydrogenase E1 component		oxoglutarate dehydrogenase (succinyl-transferring) activity (GO:0004591);thiamin pyrophosphate binding (GO:0030976)	glycolysis (GO:0006096);tricarboxylic acid cycle (GO:0006099);2-oxoglutarate metabolic process (GO:0006103);metabolic process (GO:0008152)	mitochondrial matrix (GO:0005759)	0	80.35	81.33	40.5197	45.19	51.5326
conserved in all	PFE1125w	mitochondrial ribosomal protein L17 precursor, putative		structural constituent of ribosome (GO:0003735)	translation (GO:0006412)	intracellular (GO:0005622);mitochondrial large ribosomal subunit (GO:0005762);ribosome (GO:0005840)	0	79.52	75.9	72.29	73.494	72.8916
conserved in all	PFF1105c	chorismate synthase		chorismate synthase activity (GO:0004107);FMN binding (GO:0010181)	aromatic amino acid family biosynthetic process (GO:0009073);chorismate biosynthetic process (GO:0009423);shikimate biosynthetic process (GO:0033587)	cytosol (GO:0005829)	0	60.15	61.29	54.5113	58.4559	57.89
conserved in all	PFI1125c	beta-ketoacyl-acyl carrier protein reductase		catalytic activity (GO:0003824);3-oxoacyl-[acyl-carrier-protein] reductase activity (GO:0004316);binding (GO:0005488);oxidoreductase activity (GO:0016491);acetoacetyl-CoA reductase activity (GO:0018454);NAD or NADH binding (GO:0051287);NADPH binding (GO:0070402)	fatty acid biosynthetic process (GO:0006633);metabolic process (GO:0008152)	apicoplast (GO:0020011)	0	65.7807	65.7807	56.15	72.7575	50.1597
conserved in all	PF11_0248	mitochondrial ribosomal protein L37, putative					0	72.37	72.55	80	78	79.33
conserved in all	PFI1130c	DNA-directed RNA polymerase II, putative		DNA binding (GO:0003677);DNA-directed RNA polymerase activity (GO:0003899);protein dimerization activity (GO:0046983)	transcription (GO:0006350)		0	74.8521	77.51	53.0973	73.75	67.55
conserved in all	PF14_0224	serine/threonine protein phosphatase		protein serine/threonine phosphatase activity (GO:0004722);calcium ion binding (GO:0005509);hydrolase activity (GO:0016787)	protein amino acid dephosphorylation (GO:0006470)		0	80.19	80.4	65.0678	66.94	68.95
conserved in all	MAL7P1.106	conserved Plasmodium protein, unknown function				integral to membrane (GO:0016021)	0	61.9403	61.194	40.3	51.85	48.51
conserved in all	PFE1140c	G10 protein, putative				nucleus (GO:0005634)	0	93.88	93.88	76.8707	89.12	89.8
conserved in all	PFE1135w	iron-sulfur assembly protein, putative		structural molecule activity (GO:0005198);iron-sulfur cluster binding (GO:0051536)	iron-sulfur cluster assembly (GO:0016226)	apicoplast (GO:0020011)	0	56.8306	59.8901	42.3729	71.35	69.44
conserved in all	PF11_0250	splicing factor, putative				nucleus (GO:0005634)	0	87.59	89.66	86.9	86.9	52.4138
specific to pfal	PFD0995c	erythrocyte membrane protein 1, PfEMP1		receptor activity (GO:0004872);cell adhesion molecule binding (GO:0050839)	pathogenesis (GO:0009405);cell-cell adhesion (GO:0016337);rosetting (GO:0020013);antigenic variation (GO:0020033);cytoadherence to microvasculature, mediated by parasite protein (GO:0020035)	integral to membrane (GO:0016021);host cell plasma membrane (GO:0020002);infected host cell surface knob (GO:0020030)	0	9.52602	9.20074	5.62	5.80855	7.81
conserved in all	PFF1120c	conserved Apicomplexan protein, unknown function		calcium ion binding (GO:0005509);protein binding (GO:0005515)		membrane (GO:0016020);integral to membrane (GO:0016021)	0	68.6441	66.95	66.95	66.53	66.24
conserved in all	PFF1125c	RNA-binding protein mei2 homologue, putative		RNA binding (GO:0003723)	positive regulation of meiosis (GO:0045836)		0	49.88	49.88	46.8182	45.9207	56.04
conserved in all	PF10_0220	phospholipid scramblase 1, putative					0	66.44	69.45	68.8406	65	67.61
conserved in all	MAL8P1.53	conserved Plasmodium protein, unknown function		GTPase activity (GO:0003924);calcium ion binding (GO:0005509);ATP binding (GO:0005524);GTP binding (GO:0005525)		intracellular (GO:0005622)	0	77.88	80.3502	69.8444	68.8716	76.26
specific to pfal	PFD1000c	erythrocyte membrane protein 1, PfEMP1		receptor activity (GO:0004872);cell adhesion molecule binding (GO:0050839)	pathogenesis (GO:0009405);cell-cell adhesion (GO:0016337);rosetting (GO:0020013);antigenic variation (GO:0020033);cytoadherence to microvasculature, mediated by parasite protein (GO:0020035)	integral to membrane (GO:0016021);host cell plasma membrane (GO:0020002);infected host cell surface knob (GO:0020030)	0	10.77	10.18	5.04	6.82	6.91
conserved in all	MAL7P1.110	Ham1-like protein, putative		hydrolase activity (GO:0016787)			0	58.5	57.5	50.25	53.77	56.7839
specific to pfal	PF14_0226	conserved Plasmodium protein, unknown function					0	11.8445	11.9458	10.3258	7.59	10.36
conserved in all	PF14_0227	serine/threonine protein kinase, putative		protein kinase activity (GO:0004672);protein serine/threonine kinase activity (GO:0004674);calmodulin-dependent protein kinase activity (GO:0004683);protein tyrosine kinase activity (GO:0004713);ATP binding (GO:0005524)	protein amino acid phosphorylation (GO:0006468)		0	90.8451	88.4211	85.21	49.65	69.72
conserved in all	PF10_0222	PfMNL-3 mitoNEET-like iron-sulfur protein, putative		2 iron, 2 sulfur cluster binding (GO:0051537)		intracellular membrane-bounded organelle (GO:0043231)	0	83.9	83.9	84.75	83.05	83.05
conserved in all	PF08_0043	conserved Plasmodium protein, unknown function				cytoplasm (GO:0005737)	0	49.23	44.9541	68.0628	41.5842	58.8235
conserved in all	PF08_0042	ATP-dependent RNA helicase prh1, putative		nucleic acid binding (GO:0003676);ATP-dependent RNA helicase activity (GO:0004004);helicase activity (GO:0004386);ATP binding (GO:0005524)			0	59.0348	60.4545	54.7235	50.5178	55.94
conserved in all	PFC1020c	40S ribosomal protein S3A, putative		structural constituent of ribosome (GO:0003735)	translation (GO:0006412)	intracellular (GO:0005622);ribosome (GO:0005840);cytosolic small ribosomal subunit (GO:0022627)	0	93.5115	93.8931	71.374	73.6641	93.51
conserved in all	PFI1165c	conserved Plasmodium protein, unknown function				cytoplasm (GO:0005737)	0	56.79	60.7143	51.42	61.43	57.95
conserved in all	PFE1155c	mitochondrial processing peptidase alpha subunit, putative		catalytic activity (GO:0003824);metalloendopeptidase activity (GO:0004222);ubiquinol-cytochrome-c reductase activity (GO:0008121);zinc ion binding (GO:0008270);metal ion binding (GO:0046872);mitochondrial processing peptidase activity (GO:0004240)	proteolysis (GO:0006508)	mitochondrion (GO:0005739)	0	84.1418	84.9162	61.42	80.19	72.12
conserved in all	PF13_0128	beta-hydroxyacyl-ACP dehydratase precursor		catalytic activity (GO:0003824);(3R)-hydroxymyristoyl-[acyl-carrier-protein] dehydratase activity (GO:0008659);hydro-lyase activity (GO:0016836)	fatty acid biosynthetic process (GO:0006633)	cytoplasm (GO:0005737);apicoplast (GO:0020011)	0	52.38	51.52	56.2771	50.6494	49.15
conserved in all	PF13_0129	60S ribosomal protein L6, putative		RNA binding (GO:0003723);structural constituent of ribosome (GO:0003735);rRNA binding (GO:0019843)	translation (GO:0006412)	ribosome (GO:0005840);large ribosomal subunit (GO:0015934)	0	93.6842	93.16	90.53	60.4651	71.05
conserved in all	PFC1025w	conserved Plasmodium protein, unknown function		ATP binding (GO:0005524)			0	92.5926	94.4444	61.11	98.15	98.15
conserved in all	PF11_0256	pyruvate dehydrogenase E1 alpha subunit		pyruvate dehydrogenase (acetyl-transferring) activity (GO:0004739)	acetyl-CoA biosynthetic process from pyruvate (GO:0006086);tricarboxylic acid cycle (GO:0006099);fatty acid biosynthetic process (GO:0006633);metabolic process (GO:0008152)	membrane (GO:0016020);apicoplast (GO:0020011);pyruvate dehydrogenase complex (GO:0045254)	0	49.67	51.2315	44.86	40.65	49.84
specific to pfal	PFD1005c	erythrocyte membrane protein 1, PfEMP1		receptor activity (GO:0004872);cell adhesion molecule binding (GO:0050839)	pathogenesis (GO:0009405);cell-cell adhesion (GO:0016337);rosetting (GO:0020013);antigenic variation (GO:0020033);cytoadherence to microvasculature, mediated by parasite protein (GO:0020035)	integral to membrane (GO:0016021);host cell plasma membrane (GO:0020002);infected host cell surface knob (GO:0020030)	0	9.9	9.17011	4.77	6.14397	6.51077
conserved in all	PF13_0130	vacuolar ATP synthase subunit g, putative		hydrolase activity, acting on acid anhydrides, catalyzing transmembrane movement of substances (GO:0016820)	vacuolar acidification (GO:0007035);proton transport (GO:0015992)	vacuolar proton-transporting V-type ATPase, V1 domain (GO:0000221);vacuolar proton-transporting V-type ATPase complex (GO:0016471)	0	85.37	86.18	86.18	86.18	86.99
conserved in all	PFE1165c	conserved Plasmodium protein, unknown function					0	87.6923	89.2308	84.62	86.9231	85.38
conserved in all	PFL1145w	mitochondrial carrier protein, putative		binding (GO:0005488)	transport (GO:0006810)	membrane (GO:0016020)	0	71.1039	72.08	70.405	70	69.906
conserved in all	PF07_0087	conserved Plasmodium protein, unknown function				apicoplast (GO:0020011)	0	62.86	64.52	61.89	60.2459	60.66
conserved in all	PFL1150c	mitochondrial ribosomal protein L24-2 precursor, putative		structural constituent of ribosome (GO:0003735)	translation (GO:0006412);ribosome biogenesis (GO:0042254)	intracellular (GO:0005622);ribosome (GO:0005840);cytosolic large ribosomal subunit (GO:0022625);ribonucleoprotein complex (GO:0030529)	0	79.22	79.48	78.97	77.6824	61.8
specific to pfal	PFD1010w	rifin			antigenic variation (GO:0020033)	membrane (GO:0016020);host cell plasma membrane (GO:0020002)	0	1.73232	6.69111	6.89655	12.7168	13.0058
conserved in all	PF14_0230	60S ribosomal protein L5, putative		structural constituent of ribosome (GO:0003735);5S rRNA binding (GO:0008097)	translation (GO:0006412)	intracellular (GO:0005622);mitochondrion (GO:0005739);ribosome (GO:0005840);cytosolic large ribosomal subunit (GO:0022625)	0	89.1525	89.1525	83.73	83.73	47.138
conserved in all	PF08_0039	60S ribosomal protein L22, putative		structural constituent of ribosome (GO:0003735)	translation (GO:0006412)	intracellular (GO:0005622);ribosome (GO:0005840);cytosolic large ribosomal subunit (GO:0022625)	0	84.1727	85.6115	79.29	77.1429	77.14
conserved in all	PFL1160c	conserved Plasmodium protein, unknown function					0	89.0625	88.5417	73.96	71.88	87.5
conserved in all	PFF1150w	ribonuclease HII, putative		nucleic acid binding (GO:0003676);RNA binding (GO:0003723);ribonuclease H activity (GO:0004523)	RNA catabolic process (GO:0006401);RNA metabolic process (GO:0016070)		0	86.46	86.46	42.0139	89.5833	89.24
conserved in all	MAL8P1.51	secretory complex protein 61 beta subunit		protein binding (GO:0005515);protein transporter activity (GO:0008565)	intracellular protein transport (GO:0006886);protein transport by the Sec complex (GO:0043952)	Sec61 translocon complex (GO:0005784);endoplasmic reticulum membrane (GO:0005789)	0	83.75	83.75	64.2	73.75	77.5
conserved in all	PF11_0259	nuclear preribosomal assembly protein, putative			ribosome biogenesis (GO:0042254)	nucleus (GO:0005634)	0	69.92	67.8862	69.11	69.92	69.92
conserved in all	PF14_0231	60S ribosomal protein L7-3, putative		structural constituent of ribosome (GO:0003735)	translation (GO:0006412)	cytosolic large ribosomal subunit (GO:0022625)	0	84.81	85.5124	45.94	47.35	74.91
specific to pfal	PFD1015c	erythrocyte membrane protein 1, PfEMP1		receptor activity (GO:0004872);binding (GO:0005488);cell adhesion molecule binding (GO:0050839)	pathogenesis (GO:0009405);cell-cell adhesion (GO:0016337);rosetting (GO:0020013);antigenic variation (GO:0020033);cytoadherence to microvasculature, mediated by parasite protein (GO:0020035)	integral to membrane (GO:0016021);host cell plasma membrane (GO:0020002);infected host cell surface knob (GO:0020030)	0	8.38651	9.21113	6.34	7.25	5.42636
conserved in all	MAL8P1.50	conserved Plasmodium protein, unknown function		ATP binding (GO:0005524);metal ion binding (GO:0046872)			0	75.7009	77.5701	79.44	58.88	78.5
conserved in all	PFE1175w	conserved Plasmodium protein, unknown function				cytoplasm (GO:0005737)	0	88.41	87.44	83.0918	72.4638	86.96
conserved in all	PF11_0260	60S ribosomal protein L35, putative		structural constituent of ribosome (GO:0003735)	translation (GO:0006412)	intracellular (GO:0005622);ribosome (GO:0005840);large ribosomal subunit (GO:0015934)	0	80.6452	81.4516	70.1613	65.32	80.6452
conserved in all	MAL13P1.130	glideosome associated protein with multiple membrane spans 1		protein binding (GO:0005515)		plasma membrane (GO:0005886);integral to membrane (GO:0016021);actomyosin, actin part (GO:0042643);inner membrane complex (GO:0070258)	0	94.06	94.06	91.75	89.77	91.75
conserved in all	PF08_0037	RNA polymerase II mediator complex protein MED7, putative		RNA polymerase II transcription mediator activity (GO:0016455)	regulation of transcription from RNA polymerase II promoter (GO:0006357)	mediator complex (GO:0016592)	0	53.53	52.2449	52.2556	53.8462	53.5
conserved in all	PFF1160w	conserved Plasmodium protein, unknown function					0	75.27	75.89	77.7	57.65	77.0609
conserved in all	PF11_0261	conserved Plasmodium protein, unknown function		ATP binding (GO:0005524);ATPase activity (GO:0016887)	transport (GO:0006810)	plasma membrane (GO:0005886);apicoplast (GO:0020011)	0	66.9	71.72	54.61	62.07	63.79
conserved in all	PF10_0226	conserved Plasmodium protein, unknown function				membrane (GO:0016020)	0	88.6076	88.6076	54.43	60.38	60.58
conserved in all	PF10_0227	HORMA domain protein, putative			mitosis (GO:0007067)		0	63.5	65	58.46	47.69	59.49
specific to pfal	PFD1020c	rifin			antigenic variation (GO:0020033)	membrane (GO:0016020);host cell plasma membrane (GO:0020002)	0	4.61538	1.96078	8.79346	9.77444	13.3166
conserved in all	PF07_0088	40S ribosomal protein S5, putative		structural constituent of ribosome (GO:0003735)	translation (GO:0006412)	intracellular (GO:0005622);ribosome (GO:0005840);small ribosomal subunit (GO:0015935);cytosolic small ribosomal subunit (GO:0022627)	0	97.44	96.9231	95.8974	82.05	96.4103
conserved in all	PF11_0262	vacuolar membrane protein-related, putative		nucleotide binding (GO:0000166)		cytoplasm (GO:0005737);membrane (GO:0016020)	0	57.26	59.68	59.2	54.44	65.3226
conserved in all	PF10_0228	conserved Plasmodium protein, unknown function					0	64.95	67.0103	63.92	60.82	62.89
conserved in all	MAL8P1.48	splicing factor, putative			RNA splicing, via transesterification reactions (GO:0000375)	small nucleolar ribonucleoprotein complex (GO:0005732)	0	89.16	86.75	90.3614	89.16	89.16
conserved in all	MAL8P1.46	dynein light chain 1		motor activity (GO:0003774);protein binding (GO:0005515)			0	85.5	85.93	82.4121	82.9146	67.84
conserved in all	MAL7P1.117	conserved Plasmodium protein, unknown function					0	72.9	72.9	69.81	70.75	68.87
conserved in all	PFF1180w	anaphase promoting complex subunit, putative		protein binding (GO:0005515);zinc ion binding (GO:0008270)		anaphase-promoting complex (GO:0005680)	0	82.0225	82.0225	82.0225	80.9	79.78
conserved in all	PF07_0090a	conserved Plasmodium protein, unknown function		hydrogen ion transmembrane transporter activity (GO:0015078)	ATP hydrolysis coupled proton transport (GO:0015991)	proton-transporting V-type ATPase, V0 domain (GO:0033179)	0	78.21	74.36	53.85	70.51	71.79
conserved in all	PF11_0265	mitochondrial inner membrane translocase subunit tim44, putative		P-P-bond-hydrolysis-driven protein transmembrane transporter activity (GO:0015450)	protein targeting to mitochondrion (GO:0006626);intracellular protein transport (GO:0006886)	mitochondrion (GO:0005739);mitochondrial inner membrane (GO:0005743);mitochondrial inner membrane presequence translocase complex (GO:0005744)	0	62.3431	65.14	58.9362	53.72	64.51
conserved in all	PFL1180w	chromatin assembly protein (ASF1), putative		chromatin binding (GO:0003682);unfolded protein binding (GO:0051082)	chromatin assembly or disassembly (GO:0006333);gene silencing (GO:0016458)	nucleus (GO:0005634);chromatin assembly complex (GO:0005678)	0	75.0916	74.1007	58.55	78.8321	77.37
conserved in all	PF11_0266	small nuclear ribonucleoprotein D1, putative		RNA binding (GO:0003723)	RNA splicing, via transesterification reactions (GO:0000375);nuclear mRNA splicing, via spliceosome (GO:0000398);RNA splicing (GO:0008380)	nucleus (GO:0005634);small nuclear ribonucleoprotein complex (GO:0030532)	0	80.47	78.7402	78.5714	77.78	78.5714
conserved in all	MAL13P1.132	micro-fibrillar-associated protein, putative		extracellular matrix structural constituent (GO:0005201)		extracellular region (GO:0005576);proteinaceous extracellular matrix (GO:0005578)	0	48.7179	51.6832	52.43	47.98	48.2897
conserved in all	PF11_0266a	conserved Plasmodium protein, unknown function					0	75.9036	73.494	67.47	69.88	69.88
conserved in all	MAL8P1.43	U5 snrnp-specific protein, putative			RNA splicing, via transesterification reactions (GO:0000375)	small nucleolar ribonucleoprotein complex (GO:0005732)	0	68.21	68.52	71.6049	70.0617	51.3761
conserved in all	PF11_0268	kelch protein, putative					0	60.8108	58.61	50.08	56.3	55.76
conserved in all	PF14_0237	conserved Plasmodium protein, unknown function			transport (GO:0006810)	integral to membrane (GO:0016021)	0	48.24	47	49.86	43.9227	44.41
conserved in all	PFL1200c	splicing factor 3b subunit, putative		nucleic acid binding (GO:0003676)		mitochondrion (GO:0005739)	0	92.73	92.73	72.73	66.9811	89.19
conserved in all	MAL7P1.122	GTP binding protein, putative		GTP binding (GO:0005525)	signal transduction (GO:0007165)	intracellular (GO:0005622)	0	91.0941	91.6031	87.5318	91.0941	90.84
specific to primate	PFI1220w	conserved protein, unknown function		ATP binding (GO:0005524)		cytoplasm (GO:0005737)	0	47.1503	48.1865	13.9785	10.5364	1.29424
conserved in all	PFL1195w	conserved Plasmodium protein, unknown function					0	64.49	66.5635	72.5	57.6324	73.52
specific to pfal	PFC1095w	rifin (3D7-rifT3-5)					0	1.63043	1.94498	4.83516	6.23902	11.75
conserved in all	PFE1215c	cytosolic preribosomal GTP-binding protein, putative		GTP binding (GO:0005525)		intracellular (GO:0005622)	0	97.2603	97.2603	66.03	67.2131	95.3425
conserved in all	PF11_0269	conserved Plasmodium protein, unknown function		nucleotide binding (GO:0000166)		cytoplasm (GO:0005737)	0	64.2105	63.83	56.701	57.1429	56.1224
conserved in all	PF07_0092	nucleolar rRNA processing protein, putative					0	48.78	52.16	57.7815	53.5537	54.49
specific to pfal	PFC1100w	rifin					0	3.86885	4.02597	9.77918	11.04	7.07965
conserved in all	PF07_0093	conserved Plasmodium protein, unknown function				integral to membrane (GO:0016021)	0	68.3544	68.3544	46.84	69.6203	69.8795
specific to pfal	PFC1105w	stevor (3D7-stevorT3-2)					0	2.1881	3.9261	7.6412	9.63455	5.78313
conserved in all	PFE1230c	mitochondrial import receptor subunit tom22, putative					0	67.62	70.48	67.62	70.48	70.48
conserved in all	PF14_0241	basic transcription factor 3b, putative				transcription factor complex (GO:0005667);nascent polypeptide-associated complex (GO:0005854)	0	84.4828	82.76	73.8636	44	73.7143
conserved in all	MAL8P1.41	RWD domain-containing protein, putative					0	71.74	72.61	68.12	59.6154	68.12
conserved in all	PF10_0236	conserved Plasmodium protein, unknown function				membrane (GO:0016020)	0	73.53	74.81	81.68	83.08	83.85
conserved in all	PF11_0272	40S ribosomal protein S18, putative		nucleic acid binding (GO:0003676);RNA binding (GO:0003723);structural constituent of ribosome (GO:0003735)	translation (GO:0006412)	intracellular (GO:0005622);ribosome (GO:0005840);small ribosomal subunit (GO:0015935)	0	92.95	93.59	82.39	92.31	92.31
specific to pfal	PFC1115w	rifin (3D7-rifT3-7)					0	5.63272	7.34095	4.96709	7.00809	10.2426
conserved in all	PFI1245c	protein phosphatase-beta		hydrolase activity (GO:0016787)			0	67.02	67.15	70.79	70.4545	55.9
conserved in all	MAL8P1.40	RNA binding protein, putative		nucleic acid binding (GO:0003676);RNA binding (GO:0003723);protein binding (GO:0005515)	regulation of translation (GO:0006417)		0	85.274	78.4247	44.7552	87.1528	86.81
conserved in all	PFI1250w	thioredoxin-like protein 2		transcription factor activity (GO:0003700);thiol-disulfide exchange intermediate activity (GO:0030508)	cell redox homeostasis (GO:0045454);thioredoxin pathway (GO:0006125)		0	62.6866	61.65	67.97	57.8125	50.78
conserved in all	PFI1255w	zinc binding protein (Yippee), putative					0	96.88	96.0938	89.8438	93.75	80.15
conserved in all	PFD1050w	alpha tubulin 2		GTPase activity (GO:0003924);structural molecule activity (GO:0005198);GTP binding (GO:0005525)	microtubule-based process (GO:0007017);microtubule-based movement (GO:0007018);protein polymerization (GO:0051258)	microtubule (GO:0005874);protein complex (GO:0043234)	0	99.56	99.56	48.8889	86.8889	99.56
conserved in all	PF14_0244	ABC transporter, (EPP family), putative		nucleotide binding (GO:0000166);ATP binding (GO:0005524);ATPase activity (GO:0016887);nucleoside-triphosphatase activity (GO:0017111);ATPase activity, coupled to transmembrane movement of substances (GO:0042626)	transport (GO:0006810)	membrane (GO:0016020)	0	78.25	79.85	42.27	45.61	48.61
conserved in all	MAL7P1.124	conserved Plasmodium protein, unknown function				membrane (GO:0016020)	0	54.42	54.7558	42.34	63.5097	61
conserved in all	PF11_0274	large ribosomal subunit processing factor, putative			response to stress (GO:0006950)	cytoplasm (GO:0005737)	0	58.38	59.89	42.4731	53.76	52.69
conserved in all	PFD1055w	40S ribosomal protein S19, putative		structural constituent of ribosome (GO:0003735)	translation (GO:0006412)	intracellular (GO:0005622);ribosome (GO:0005840)	0	87.2093	86.0465	86.05	86.0465	86.05
specific to pfal	PFC1120c	erythrocyte membrane protein 1, PfEMP1		receptor activity (GO:0004872)	pathogenesis (GO:0009405)	integral to membrane (GO:0016021);outer membrane (GO:0019867)	0	9.49309	9.89871	2.9	3.83	6.08575
conserved in all	MAL13P1.135	SNARE protein, putative		SNAP receptor activity (GO:0005484);protein binding (GO:0005515)	transport (GO:0006810);intracellular protein transport (GO:0006886);vesicle-mediated transport (GO:0016192);regulation of vesicle fusion (GO:0031338)	integral to membrane (GO:0016021);SNARE complex (GO:0031201)	0	76.9231	76.02	78.73	74.6606	79.64
specific to primate	PFF1235w	conserved Plasmodium membrane protein, unknown function				membrane (GO:0016020)	0	44.2136	45.56	9.2	9.79228	12.0072
conserved in all	MAL8P1.38	alpha/beta-hydrolase, putative		hydrolase activity (GO:0016787)			0	62.22	61.4504	61.54	65.66	61.01
conserved in all	PF13_0141	L-lactate dehydrogenase		catalytic activity (GO:0003824);L-lactate dehydrogenase activity (GO:0004459);binding (GO:0005488);oxidoreductase activity (GO:0016491)	carbohydrate metabolic process (GO:0005975);glycolysis (GO:0006096);metabolic process (GO:0008152);cellular carbohydrate metabolic process (GO:0044262)		0	90.19	90.19	91.7722	92.41	93.04
conserved in all	PFF1245c	conserved Plasmodium protein, unknown function					0	67.35	65.31	66.33	67.35	46.9388
conserved in all	MAL8P1.36	conserved Plasmodium protein, unknown function				membrane (GO:0016020)	0	59.7	54.55	60.61	62.12	66.67
conserved in all	PF07_0099	conserved Plasmodium protein, unknown function					0	55.48	58.44	60	46	62.42
conserved in all	PFD1065c	conserved Plasmodium protein, unknown function					0	59.29	65.7343	73.5714	70.7143	67.86
conserved in all	PFD1070w	eukaryotic initiation factor, putative		nucleic acid binding (GO:0003676);translation initiation factor activity (GO:0003743);ATP-dependent RNA helicase activity (GO:0004004);helicase activity (GO:0004386);ATP binding (GO:0005524);ATP-dependent helicase activity (GO:0008026)	regulation of translational initiation (GO:0006446)	eukaryotic translation initiation factor 4F complex (GO:0016281)	0	95.9	96.67	82.8205	41.45	94.36
conserved in all	PF08_0032	DnaJ protein, putative		heat shock protein binding (GO:0031072);unfolded protein binding (GO:0051082)	protein folding (GO:0006457)		0	65.05	64.39	46.6754	61.3534	49.1729
conserved in all	PF13_0144	oxidoreductase, putative		catalytic activity (GO:0003824);L-lactate dehydrogenase activity (GO:0004459);binding (GO:0005488);oxidoreductase activity (GO:0016491);L-malate dehydrogenase activity (GO:0030060)	carbohydrate metabolic process (GO:0005975);lactate metabolic process (GO:0006089);pyruvate metabolic process (GO:0006090);glycolysis (GO:0006096);tricarboxylic acid cycle (GO:0006099);malate metabolic process (GO:0006108);metabolic process (GO:0008152);cellular carbohydrate metabolic process (GO:0044262);tricarboxylic acid cycle intermediate metabolic process (GO:0006100)		0	94.3114	93.4132	88.024	79.0419	81.74
conserved in all	PF08_0031	oxoglutarate/malate translocator protein, putative		dicarboxylic acid transmembrane transporter activity (GO:0005310);binding (GO:0005488);oxoglutarate:malate antiporter activity (GO:0015367)	transport (GO:0006810);dicarboxylic acid transport (GO:0006835);mitochondrial transport (GO:0006839);alpha-ketoglutarate transport (GO:0015742);malate transport (GO:0015743)	mitochondrial inner membrane (GO:0005743);membrane (GO:0016020)	0	87.4214	87.11	84.38	84.0625	43.08
conserved in all	PF14_0248	ubiquinol-cytochrome c reductase hinge protein, putative		ubiquinol-cytochrome-c reductase activity (GO:0008121)	mitochondrial electron transport, ubiquinol to cytochrome c (GO:0006122)	mitochondrion (GO:0005739);mitochondrial respiratory chain complex III (GO:0005750)	0	81.82	82.9545	93.1818	92.05	92.05
conserved in all	PFD1080w	conserved Plasmodium protein, unknown function		transferase activity (GO:0016740)			0	69.3548	68.9516	62.55	61.57	61.54
conserved in all	PFD1090c	clathrin assembly protein, putative		protein binding (GO:0005515);protein transporter activity (GO:0008565)	transport (GO:0006810);intracellular protein transport (GO:0006886);protein transport (GO:0015031);vesicle-mediated transport (GO:0016192)	membrane coat (GO:0030117);transport vesicle (GO:0030133);stored secretory granule (GO:0030141)	0	95.21	95.21	93.84	43.84	93.1507
conserved in all	PFD1095w	BSD domain, putative					0	55.56	59.1549	62.7737	62.7737	64.23
conserved in all	MAL8P1.35	exonuclease, putative		nucleic acid binding (GO:0003676);3'-5' exonuclease activity (GO:0008408)	nucleobase, nucleoside, nucleotide and nucleic acid metabolic process (GO:0006139)	intracellular (GO:0005622)	0	67.55	66.35	59.6107	59.4595	41.98
conserved in all	PF11_0280	small nuclear ribonucleoprotein F, putative				mitochondrion (GO:0005739)	0	87.21	87.21	79.07	79.07	80.23
conserved in all	PFF1265w	oxidoreductase, short-chain dehydrogenase family, putative		catalytic activity (GO:0003824);binding (GO:0005488);oxidoreductase activity (GO:0016491)	metabolic process (GO:0008152)	membrane (GO:0016020)	0	66.06	66.32	45.45	60.7792	61.28
conserved in all	PFL1260w	hydrolase/phosphatase, putative		catalytic activity (GO:0003824);hydrolase activity (GO:0016787)			0	56.33	56.01	49.3711	51.89	51.26
specific to pfal	MAL13P1.137	conserved Plasmodium protein, unknown function		motor activity (GO:0003774);actin binding (GO:0003779);calmodulin binding (GO:0005516);ATP binding (GO:0005524)		cytoplasm (GO:0005737);myosin complex (GO:0016459)	0	13.2753	14.442	4.14891	4.31941	12.2339
conserved in all	PF11_0282	deoxyuridine 5'-triphosphate nucleotidohydrolase		dUTP diphosphatase activity (GO:0004170);hydrolase activity (GO:0016787)	DNA replication (GO:0006260);tRNA metabolic process (GO:0006399);dUTP metabolic process (GO:0046080)		0	83.82	78.92	83.24	83.0508	83.05
conserved in all	PFF1275c	3-oxoacyl-acyl-carrier protein synthase I/II		catalytic activity (GO:0003824);fatty acid synthase activity (GO:0004312);3-oxoacyl-[acyl-carrier-protein] synthase activity (GO:0004315)	fatty acid biosynthetic process (GO:0006633);metabolic process (GO:0008152)	apicoplast (GO:0020011)	0	78.3613	78.7815	41.5966	56.1983	75.48
conserved in all	PFF1270c	conserved Plasmodium protein, unknown function					0	46.3007	48.21	43.8679	44.39	51.42
conserved in all	MAL8P1.33	GTP binding protein, putative		GTP binding (GO:0005525)		intracellular (GO:0005622)	0	49.68	52.45	52.91	44.53	47.1
conserved in all	PFD1110w	glideosome associated protein with multiple membrane spans 2		protein binding (GO:0005515);metal ion binding (GO:0046872)	transport (GO:0006810)	membrane (GO:0016020);integral to membrane (GO:0016021);actomyosin, actin part (GO:0042643);inner membrane complex (GO:0070258)	0	87.1	86.83	48.12	80.6452	84.68
conserved in all	PFL1270w	cof-like hydrolase, had-superfamily, subfamily iib		catalytic activity (GO:0003824);hydrolase activity (GO:0016787)	metabolic process (GO:0008152)		0	90.85	89.1525	57.6271	89.1525	88.8136
conserved in all	PF08_0029	conserved Plasmodium protein, unknown function				cytoplasm (GO:0005737);membrane (GO:0016020)	0	56.84	56.84	46.0317	56.9519	56.95
conserved in all	PFE1280w	conserved Plasmodium protein, unknown function					0	69.7	69.7	64.3939	65.1515	49.62
conserved in all	MAL13P1.139a	conserved Plasmodium protein, unknown function					0	58.2278	63.2911	53.16	49.37	49.37
conserved in all	PFE1285w	membrane skeletal protein IMC1-related					0	76.08	77.3333	41	63.67	63.3333
conserved in all	PFI1295c	monocarboxylate transporter, putative					0	60.93	61.9224	46.6	52.05	59.36
conserved in all	PF11_0287	CRAL/TRIO domain-containing protein, putative		transporter activity (GO:0005215)	transport (GO:0006810)	intracellular (GO:0005622);cytoplasm (GO:0005737);membrane (GO:0016020)	0	72.8188	73.4007	55.85	61.54	62.88
conserved in all	PFF1295w	conserved Plasmodium protein, unknown function					0	68.4492	68.3511	47.5806	69.09	69.89
conserved in all	PFL1285c	proliferating cell nuclear antigen 2		DNA binding (GO:0003677);DNA polymerase processivity factor activity (GO:0030337)	regulation of DNA replication (GO:0006275);protein oligomerization (GO:0051259)	nucleus (GO:0005634);PCNA complex (GO:0043626)	0	92.803	92.4242	93.94	93.5606	86.42
specific to pfal	PF13_0146	conserved Plasmodium protein, unknown function					0	14.6023	14.1194	9.92	9.03184	12.8172
conserved in all	PFF1300w	pyruvate kinase		magnesium ion binding (GO:0000287);catalytic activity (GO:0003824);pyruvate kinase activity (GO:0004743);potassium ion binding (GO:0030955)	glycolysis (GO:0006096);protein homotetramerization (GO:0051289)		0	91.98	91.98	85.91	90.8023	90.8023
conserved in all	PF07_0103	mitochondrial import inner membrane translocase subunit tim14, putative		heat shock protein binding (GO:0031072);unfolded protein binding (GO:0051082)			0	79.1304	81.0345	78.2609	78.2609	80
conserved in all	MAL7P1.131	conserved Plasmodium protein, unknown function		protein binding (GO:0005515)		cytoplasm (GO:0005737)	0	58.6885	62.1711	53.29	53.9474	56.25
conserved in all	PF14_0256	exosome complex exonuclease rrp41, putative		3'-5'-exoribonuclease activity (GO:0000175);RNA binding (GO:0003723);exonuclease activity (GO:0004527)	rRNA processing (GO:0006364);RNA processing (GO:0006396)	exosome (RNase complex) (GO:0000178)	0	71.5447	71.14	65.0407	69.11	49.19
conserved in all	PF10_0253b	conserved Plasmodium protein, unknown function					0	69.57	68.4211	64.18	79.1	79.1
conserved in all	MAL13P1.550	conserved Plasmodium protein, unknown function					0	46.47	47.96	47.74	47.37	60.53
conserved in all	MAL8P1.27	translation initiation factor IF-3, putative		translation initiation factor activity (GO:0003743)	translational initiation (GO:0006413)		0	69.8324	72.99	48.19	72.8916	66.06
conserved in all	PFL1310c	DNA helicase 60		nucleic acid binding (GO:0003676);RNA binding (GO:0003723);ATP-dependent RNA helicase activity (GO:0004004);helicase activity (GO:0004386);ATP binding (GO:0005524);ATP-dependent helicase activity (GO:0008026)	RNA metabolic process (GO:0016070)	mitochondrion (GO:0005739)	0	50.87	52.6667	55.7951	45.55	56.5276
specific to pfal	PFD1150c	reticulocyte binding protein homologue 4					0	11.2713	10.24	3.67	5.36	12.886
conserved in all	PFI1320c	conserved Plasmodium protein, unknown function		ubiquitin-protein ligase activity (GO:0004842)	protein ubiquitination (GO:0016567)	ubiquitin ligase complex (GO:0000151);nucleus (GO:0005634)	0	53.9749	56.6524	45.3333	69.3333	54.55
conserved in all	PFI1325w	CS domain protein, putative					0	77.5641	78.21	80.77	82.6923	73.72
conserved in all	PFF1325c	c3h4-type ring finger protein, putative		protein binding (GO:0005515);zinc ion binding (GO:0008270)			0	45.43	45.66	41.33	42.44	44.32
conserved in all	PF11_0295	farnesyl pyrophosphate synthase, putative		geranyltranstransferase activity (GO:0004337)	isoprenoid biosynthetic process (GO:0008299)		0	73.1383	71.8085	46.8085	69.58	55.56
conserved in all	PFF1345w	transportin		binding (GO:0005488);protein transmembrane transporter activity (GO:0008320);protein transporter activity (GO:0008565)	protein import into nucleus, docking (GO:0000059);protein import into nucleus (GO:0006606);intracellular protein transport (GO:0006886)	nucleus (GO:0005634);nuclear pore (GO:0005643);cytoplasm (GO:0005737)	0	79.76	78.45	50.8282	66.2902	57.72
specific to pfal	PFD1160w	surface-associated interspersed gene 4.2, (SURFIN4.2)					0	10.1716	5.7563	5.34	4.49	6.76471
conserved in all	PFI1340w	fumarate hydratase, putative		lyase activity (GO:0016829);hydro-lyase activity (GO:0016836)			0	69.11	69.25	68.8047	48.5021	65.4596
conserved in all	PF11_0301	spermidine synthase		catalytic activity (GO:0003824);spermidine synthase activity (GO:0004766)	spermidine biosynthetic process (GO:0008295)		0	82.87	82.87	81.62	76.64	84.42
conserved in all	PF10_0264	40S ribosomal protein S2B, putative		structural constituent of ribosome (GO:0003735)	translation (GO:0006412)	intracellular (GO:0005622);ribosome (GO:0005840);small ribosomal subunit (GO:0015935);cytosolic small ribosomal subunit (GO:0022627)	0	92.02	92.803	92.02	91.635	40.51
conserved in all	PFE1340w	conserved Plasmodium protein, unknown function			transport (GO:0006810);protein transport (GO:0015031);vesicle-mediated transport (GO:0016192)	Golgi membrane (GO:0000139);endoplasmic reticulum (GO:0005783);endoplasmic reticulum membrane (GO:0005789);Golgi apparatus (GO:0005794);membrane (GO:0016020);integral to membrane (GO:0016021)	0	76.7442	72.43	57.9439	61.6822	61.21
specific to pfal	PF10_0262	conserved Plasmodium protein, unknown function		structural molecule activity (GO:0005198)	phosphate transport (GO:0006817)	extracellular region (GO:0005576);cytoplasm (GO:0005737)	0	13.7681	14.0321	6.79669	10.5605	8.39243
specific to pfal	PF14_0262	probable protein, unknown function				cytoplasm (GO:0005737);membrane (GO:0016020)	0	6.93	12.2073	4.97	7.99	9.75
conserved in all	MAL7P1.139	mago nashi protein homolog, putative			sex determination (GO:0007530)	nucleus (GO:0005634)	0	94.5946	92	91.89	71.74	91.22
conserved in all	PFI1360c	serine/threonine protein phosphatase, putative		hydrolase activity (GO:0016787)			0	70.8333	72.12	61.859	47.81	74.7604
conserved in all	MAL13P1.360	conserved Plasmodium protein, unknown function		triglyceride lipase activity (GO:0004806);hydrolase activity (GO:0016787)	lipid catabolic process (GO:0016042)	extracellular region (GO:0005576);membrane (GO:0016020)	0	48.4629	50.6329	43.33	51.66	54.7
conserved in all	PF07_0106	conserved Plasmodium protein, unknown function				cytoplasm (GO:0005737)	0	53.01	53.05	47.1564	51.0533	43.07
conserved in all	PF14_0265	peptide chain release factor 1, putative		translation release factor activity (GO:0003747)	translational termination (GO:0006415)	apicoplast (GO:0020011)	0	55.37	57.7	51.15	56.25	54.4
conserved in all	PF11_0303	26S proteasome regulatory subunit, putative		endopeptidase activity (GO:0004175)	proteolysis (GO:0006508)	proteasome complex (GO:0000502)	0	83.21	83.72	58.52	62.09	80.15
conserved in all	PFE1350c	ubiquitin conjugating enzyme 13, putative		ubiquitin-protein ligase activity (GO:0004842);small conjugating protein ligase activity (GO:0019787)	post-translational protein modification (GO:0043687);regulation of protein metabolic process (GO:0051246);ubiquitin cycle (GO:0006512)		0	92.7632	93.4211	46.0526	89.4737	88.82
conserved in all	PF14_0267	transcription initiation TFIID-like, putative		DNA binding (GO:0003677);RNA polymerase II transcription factor activity (GO:0003702)	regulation of transcription, DNA-dependent (GO:0006355);transcription initiation from RNA polymerase II promoter (GO:0006367)	nucleus (GO:0005634);transcription factor TFIID complex (GO:0005669);membrane (GO:0016020)	0	53.41	53.6585	41.42	59.3496	62.33
specific to primate	MAL8P1.23	ubiquitin-protein ligase 1, putative		catalytic activity (GO:0003824);ubiquitin-protein ligase activity (GO:0004842);Rho guanyl-nucleotide exchange factor activity (GO:0005089);acid-amino acid ligase activity (GO:0016881)	protein modification process (GO:0006464);ubiquitin-dependent protein catabolic process (GO:0006511);regulation of Rho protein signal transduction (GO:0035023)	intracellular (GO:0005622)	0	46.29	47.05	2.31638	5.20446	2.30474
conserved in all	PFI1375w-b	cytochrome c oxidase, putative		cytochrome-c oxidase activity (GO:0004129)		mitochondrion (GO:0005739)	0	81.5534	76.7	79.6117	81.5534	81.55
specific to pfal	PF10_0265	conserved Plasmodium protein, unknown function				cytoplasm (GO:0005737)	0	10.6061	14.2546	7.06402	5.73951	14.2936
conserved in all	PF11_0305	RNA methyltransferase, putative		RNA binding (GO:0003723);rRNA methyltransferase activity (GO:0008649);S-adenosylmethionine-dependent methyltransferase activity (GO:0008757)	rRNA processing (GO:0006364);ribosome biogenesis (GO:0042254)	nucleolus (GO:0005730)	0	52.49	54.56	53.27	55.9375	46.2462
conserved in all	PF14_0269	conserved protein, unknown function					0	48.95	48.95	49.79	51.0549	49.79
conserved in all	PFL1355w	conserved Plasmodium protein, unknown function					0	72.11	70.75	41.4966	77.551	77.551
conserved in all	PFL1360c	leucine-rich repeat protein		protein binding (GO:0005515)			0	55.2402	59.1518	63.311	56.8233	52.57
conserved in all	PF10_0269	DNA-directed RNA polymerase II, putative		DNA-directed RNA polymerase activity (GO:0003899)	transcription (GO:0006350);transcription from RNA polymerase II promoter (GO:0006366)	DNA-directed RNA polymerase II, core complex (GO:0005665)	0	92.66	93.79	93.2203	57.7778	93.22
conserved in all	PF10_0270	conserved Plasmodium protein, unknown function					0	69.4444	70.8333	72.2222	69.4444	70.83
specific to pfal	PF07_0107	Plasmodium exported protein, unknown function					0	7.34745	11.147	10.71	13.4161	13.4496
conserved in all	PF10_0412	topoisomerase, putative		DNA binding (GO:0003677);catalytic activity (GO:0003824);ATP binding (GO:0005524)	DNA metabolic process (GO:0006259)	chromosome (GO:0005694)	0	57.4405	58.9286	57.14	53.57	64.88
specific to pfal/pyoe	PF11_0308	conserved Plasmodium protein, unknown function		metal ion binding (GO:0046872)		nucleus (GO:0005634);cytoplasm (GO:0005737)	0	4.68933	13.89	55.4348	65	61.6216
specific to pfal	PFE1325w	conserved Plasmodium protein, unknown function		acyltransferase activity (GO:0008415);transferase activity (GO:0016740)	lipid biosynthetic process (GO:0008610);lipid A biosynthetic process (GO:0009245)		0	11.1848	10.3159	2.85146	5.74713	6.82722
conserved in all	PF14_0272	CPW-WPC family protein					0	53.4031	55.23	53.73	49.87	56.18
specific to pfal	PFD1230c	rifin			antigenic variation (GO:0020033)	membrane (GO:0016020);host cell plasma membrane (GO:0020002)	0	4.2747	2.77653	0	5.94796	4.71294
conserved in all	PFE1395c	conserved Plasmodium protein, unknown function				cytoplasm (GO:0005737)	0	68.55	69.3548	73.39	73.39	72.58
conserved in all	PF10_0273	DHHC-type zinc finger protein, putative		zinc ion binding (GO:0008270)		membrane (GO:0016020)	0	71.4815	72.963	40	67.78	58.52
conserved in all	PFE1400c	beta adaptin protein, putative		binding (GO:0005488);protein binding (GO:0005515);protein transporter activity (GO:0008565)	intracellular protein transport (GO:0006886);protein transport (GO:0015031);vesicle-mediated transport (GO:0016192)	membrane coat (GO:0030117);clathrin adaptor complex (GO:0030131)	0	89.7326	89.63	57.2038	79.2553	60.59
conserved in all	PFL1380w	RNA pseudouridylate synthase, putative		RNA binding (GO:0003723);pseudouridine synthase activity (GO:0009982)	pseudouridine synthesis (GO:0001522);RNA modification (GO:0009451)		0	48.3173	49.39	49.0244	49.39	53.55
conserved in all	PFI1420w	guanylate kinase		guanylate kinase activity (GO:0004385);nucleoside kinase activity (GO:0019206)	purine nucleotide metabolic process (GO:0006163);dGDP phosphorylation (GO:0006186);phosphorylation (GO:0016310)		0	64.3216	65.8291	63.6816	64.18	65.33
specific to pfal	PFD1235w	erythrocyte membrane protein 1, PfEMP1		receptor activity (GO:0004872);binding (GO:0005488);protein binding (GO:0005515);GTP binding (GO:0005525);cell adhesion molecule binding (GO:0050839)	SRP-dependent cotranslational protein targeting to membrane (GO:0006614);pathogenesis (GO:0009405);cell-cell adhesion (GO:0016337);rosetting (GO:0020013);antigenic variation (GO:0020033);cytoadherence to microvasculature, mediated by parasite protein (GO:0020035)	integral to membrane (GO:0016021);host cell plasma membrane (GO:0020002);infected host cell surface knob (GO:0020030)	0	10.24	6.19195	3.12	3.57444	5.06
conserved in all	PF11_0313	60S ribosomal protein P0		structural constituent of ribosome (GO:0003735)	translation (GO:0006412);translational elongation (GO:0006414);ribosome biogenesis (GO:0042254)	intracellular (GO:0005622);mitochondrion (GO:0005739);ribosome (GO:0005840);cytosolic large ribosomal subunit (GO:0022625)	0	91.46	89.56	63.2911	88.6076	88.9241
conserved in all	PF10_0274	methyltransferase, putative		methyltransferase activity (GO:0008168)	metabolic process (GO:0008152)		0	57.67	58.52	56.49	51.52	59.53
conserved in all	PF10_0276	zinc finger, C3HC4 type, putative		protein binding (GO:0005515);zinc ion binding (GO:0008270)		membrane (GO:0016020)	0	78.1022	77.74	73.7226	51.2635	74.09
conserved in all	PF14_0276	mitochondrial ribosomal protein L15 precursor, putative		structural constituent of ribosome (GO:0003735)	translation (GO:0006412)	intracellular (GO:0005622);mitochondrion (GO:0005739);mitochondrial large ribosomal subunit (GO:0005762);ribosome (GO:0005840)	0	65.85	67.75	69.48	70.3804	61.9565
conserved in all	PF11_0314	26S proteasome regulatory subunit 6a, putative		nucleotide binding (GO:0000166);endopeptidase activity (GO:0004175);ATP binding (GO:0005524);hydrolase activity (GO:0016787);ATPase activity (GO:0016887);nucleoside-triphosphatase activity (GO:0017111)	proteolysis (GO:0006508);protein catabolic process (GO:0030163)	proteasome complex (GO:0000502);nucleus (GO:0005634);cytoplasm (GO:0005737)	0	94.7846	95.4545	59.24	76.5	92.2222
specific to pfal	PFD1240w	rifin			antigenic variation (GO:0020033)	membrane (GO:0016020);host cell plasma membrane (GO:0020002)	0	0.751542	2.99033	5.28993	7.70465	5.02549
conserved in all	PFE1415w	cell cycle regulator with zn-finger domain, putative		zinc ion binding (GO:0008270)			0	67.24	66.59	55.9113	54.1872	57.88
conserved in all	PFE1425c	conserved Plasmodium protein, unknown function		nucleotide binding (GO:0000166)			0	58.4906	59.434	60.95	60	60.9524
specific to pfal	PFD1245c	erythrocyte membrane protein 1, PfEMP1		receptor activity (GO:0004872);cell adhesion molecule binding (GO:0050839)	pathogenesis (GO:0009405);cell-cell adhesion (GO:0016337);rosetting (GO:0020013);antigenic variation (GO:0020033);cytoadherence to microvasculature, mediated by parasite protein (GO:0020035)	integral to membrane (GO:0016021);host cell plasma membrane (GO:0020002);infected host cell surface knob (GO:0020030)	0	9.95812	8.50767	5.35133	5.11628	5.77
conserved in all	PFF1380c	conserved Plasmodium protein, unknown function		ATP binding (GO:0005524)		cytoplasm (GO:0005737)	0	68.04	69.3038	68.99	72.1519	46.56
conserved in all	PFI1450c	conserved Plasmodium protein, unknown function				cytoplasm (GO:0005737);cell projection (GO:0042995)	0	60.29	60.29	66.51	64.7619	66.03
conserved in all	PFI1455c	conserved Plasmodium protein, unknown function					0	76.1905	76.56	63.6029	75.74	64.34
conserved in all	PFE1440c	conserved Plasmodium protein, unknown function		structural constituent of ribosome (GO:0003735);rRNA binding (GO:0019843)	translation (GO:0006412)	intracellular (GO:0005622);ribosome (GO:0005840)	0	52.17	58.6777	50.66	56.6	51.08
conserved in all	PFI1460cb	conserved Plasmodium protein, unknown function, patched					0	41.8848	45.43	49.0028	44.5714	54.86
conserved in all	PF14_0280	phosphotyrosyl phosphatase activator, putative		protein tyrosine phosphatase activator activity (GO:0008160);phosphatase activator activity (GO:0019211)	protein amino acid dephosphorylation (GO:0006470)		0	73.67	74.4615	77.26	76.8025	72.14
conserved in all	PFI1460ca	conserved Plasmodium protein, unknown function, patched					0	76.5306	75.5102	80.61	79.59	79.59
conserved in all	PF08_0014	apicoplast ribosomal protein L21 precursor, putative		RNA binding (GO:0003723);structural constituent of ribosome (GO:0003735)	translation (GO:0006412)	plastid large ribosomal subunit (GO:0000311);intracellular (GO:0005622);ribosome (GO:0005840);apicoplast (GO:0020011)	0	64.35	65.62	67.1924	47.4684	67.5
conserved in all	PF11_0318	PF16 protein, putative		binding (GO:0005488)			0	69.55	70.73	43.47	72.35	73.0315
specific to pfal	PFE1455w	sugar transporter, putative		sugar:hydrogen symporter activity (GO:0005351)	carbohydrate transport (GO:0008643)	integral to membrane (GO:0016021)	0	12.41	9.31	11.5865	12.6739	10.5379
conserved in all	PFF1410c	nicotinate phosphoribosyltransferase, putative		nicotinate phosphoribosyltransferase activity (GO:0004516)	NAD biosynthetic process (GO:0009435);nicotinate nucleotide biosynthetic process (GO:0019357)	cytoplasm (GO:0005737)	0	60.03	61.0947	49.1729	43.54	58.27
conserved in all	PF07_0109a	conserved Plasmodium protein, unknown function					0	58.8785	59.8131	40.58	60.19	60.19
conserved in all	PF07_0110	protein phosphatase, putative					0	52.6119	52.22	51.83	51.06	52.02
conserved in all	PF14_0284	conserved Plasmodium protein, unknown function		nucleotide binding (GO:0000166)		apicoplast (GO:0020011)	0	55.76	55.08	54.6275	57.47	57.01
conserved in all	PF10_0289	adenosine deaminase, putative		adenosine deaminase activity (GO:0004000);deaminase activity (GO:0019239)	purine ribonucleoside monophosphate biosynthetic process (GO:0009168)		0	71.47	71.2	53.3693	62.5	61.413
conserved in all	PFE1470w	cell cycle regulator protein, putative		RNA binding (GO:0003723)	regulation of cell cycle (GO:0051726)		0	89.39	89.39	59.22	76.67	70.56
conserved in all	PFL1420w	macrophage migration inhibitory factor		cytokine activity (GO:0005125);oxidoreductase activity (GO:0016491);host cell surface receptor binding (GO:0046789)	evasion or tolerance of host immune response (GO:0020012)	cytoplasm (GO:0005737);host cell cytoplasm (GO:0030430)	0	71.5517	68.1034	75.8621	64.7059	76.72
conserved in all	MAL8P1.17	protein disulfide isomerase		protein disulfide isomerase activity (GO:0003756);isomerase activity (GO:0016853)	protein folding (GO:0006457);cell redox homeostasis (GO:0045454)	endoplasmic reticulum (GO:0005783);endoplasmic reticulum lumen (GO:0005788)	0	83.23	83.8509	40.1656	61.03	82.61
conserved in all	PF10_0291	RAP protein, putative					0	72.79	72.5624	64.3021	63.53	75.2834
conserved in all	MAL8P1.16	rhomboid protease ROM3		peptidase activity (GO:0008233)	signal peptide processing (GO:0006465)	integral to membrane (GO:0016021)	0	66.0448	68.66	70.79	71.16	70.04
conserved in all	PF14_0286	glutamate dehydrogenase, putative		catalytic activity (GO:0003824);glutamate dehydrogenase (NADP) activity (GO:0004354);binding (GO:0005488);oxidoreductase activity (GO:0016491)	cellular amino acid metabolic process (GO:0006520);metabolic process (GO:0008152);oxidation reduction (GO:0055114)	apicoplast (GO:0020011)	0	71.5686	72.9412	53.29	69.8039	70.78
conserved in all	MAL7P1.150	cysteine desulfurase, putative		cystathionine gamma-lyase activity (GO:0004123)	cysteine metabolic process (GO:0006534);metabolic process (GO:0008152)	apicoplast (GO:0020011)	0	67.6311	69.4394	63.6528	66.6667	50
conserved in all	PF13_0152	transcriptional regulatory protein sir2a		DNA binding (GO:0003677);zinc ion binding (GO:0008270);hydrolase activity, acting on carbon-nitrogen (but not peptide) bonds, in linear amides (GO:0016811);NAD binding (GO:0070403)	chromatin silencing (GO:0006342);regulation of transcription, DNA-dependent (GO:0006355);protein amino acid deacetylation (GO:0006476);telomere capping (GO:0016233);regulation of transcription (GO:0045449)	chromatin silencing complex (GO:0005677)	0	71.28	68.7708	79.49	80.59	80.95
conserved in all	PF13_0151	conserved Plasmodium protein, unknown function		protein binding (GO:0005515)		cytoplasm (GO:0005737)	0	52.3929	54.52	50.25	53.9043	45.86
conserved in all	PF07_0112	proteasome subunit alpha type 5, putative		endopeptidase activity (GO:0004175);threonine-type endopeptidase activity (GO:0004298)	ubiquitin-dependent protein catabolic process (GO:0006511);proteolysis involved in cellular protein catabolic process (GO:0051603)	proteasome core complex (GO:0005839);proteasome core complex, alpha-subunit complex (GO:0019773)	0	94.1406	94.9219	89.8438	91.8	91.8
conserved in all	PF14_0289	mitochondrial ribosomal protein L17-2 precursor, putative		structural constituent of ribosome (GO:0003735)	translation (GO:0006412)	organellar large ribosomal subunit (GO:0000315);intracellular (GO:0005622);mitochondrion (GO:0005739);ribosome (GO:0005840)	0	77.821	76.2646	55.77	69.7674	53.4884
conserved in all	PFE1490c	RING zinc finger protein, putative		protein binding (GO:0005515);zinc ion binding (GO:0008270)			0	80.3333	79.6667	82.89	82.39	79.35
conserved in all	PF10_0293	transcription factor, putative		chromatin binding (GO:0003682);transcription factor activity (GO:0003700);positive transcription elongation factor activity (GO:0008159);zinc ion binding (GO:0008270)	transcription (GO:0006350);positive regulation of transcription (GO:0045941)	nucleus (GO:0005634)	0	81.203	81.203	74.44	51.59	76.6917
conserved in all	PF10_0295	conserved Plasmodium protein, unknown function		nucleotide binding (GO:0000166)		nucleus (GO:0005634);cytoplasm (GO:0005737);membrane (GO:0016020)	0	65.27	62.17	59.43	51.33	58.06
conserved in all	PF08_0009	translation initiation factor EIF-2b alpha subunit, putative		translation initiation factor activity (GO:0003743)	translational initiation (GO:0006413);cellular metabolic process (GO:0044237)	eukaryotic translation initiation factor 2B complex (GO:0005851)	0	59.593	59.8837	53.78	54.36	47.81
conserved in all	MAL8P1.13	folate/biopterin transporter, putative				integral to membrane (GO:0016021)	0	62.92	62.45	43.25	56.24	57.2
conserved in all	PF13_0149	chromatin assembly factor 1 subunit, putative		chromatin binding (GO:0003682);histone binding (GO:0042393);unfolded protein binding (GO:0051082)	chromatin assembly or disassembly (GO:0006333)	chromatin assembly complex (GO:0005678)	0	60.7908	62.8952	58.5911	66.84	44.6735
specific to primate	PF08_0007	conserved Plasmodium protein, unknown function		transferase activity (GO:0016740)			0	63.98	66.13	12.1875	44.3243	7.8329
conserved in all	PF14_0295	ATP-specific succinyl-CoA synthetase beta subunit, putative		catalytic activity (GO:0003824);succinate-CoA ligase (ADP-forming) activity (GO:0004775)	tricarboxylic acid cycle (GO:0006099);succinyl-CoA metabolic process (GO:0006104);metabolic process (GO:0008152)	mitochondrion (GO:0005739);mitochondrial matrix (GO:0005759)	0	70.3226	72.8448	55.4113	71.7622	69.697
conserved in all	MAL13P1.146	AMP deaminase, putative		AMP deaminase activity (GO:0003876);deaminase activity (GO:0019239)	AMP catabolic process (GO:0006196);purine ribonucleoside monophosphate biosynthetic process (GO:0009168)		0	72.93	74.22	55.2632	66.3704	65.19
conserved in all	PF07_0117	eukaryotic translation initiation factor 2 alpha subunit, putative		RNA binding (GO:0003723);translation initiation factor activity (GO:0003743)	translation (GO:0006412);translational initiation (GO:0006413)	eukaryotic translation initiation factor 2 complex (GO:0005850)	0	84.8485	85.1515	84.5	54.85	73.2523
conserved in all	PF14_0296	60S ribosomal protein L14, putative		structural constituent of ribosome (GO:0003735)	translation (GO:0006412)	intracellular (GO:0005622);ribosome (GO:0005840);apicoplast (GO:0020011);cytosolic small ribosomal subunit (GO:0022627)	0	76.4706	77.11	58.79	67.2727	67.88
conserved in all	PFI1835c	NifU-like protein, putative		iron ion binding (GO:0005506);iron-sulfur cluster binding (GO:0051536)	iron-sulfur cluster assembly (GO:0016226)		0	65.98	67.53	64.77	65.98	52.58
conserved in all	PFE1530c	XAP-5 DNA binding protein, putative				nucleus (GO:0005634)	0	65.55	65.7718	41.61	64.88	53.63
conserved in all	PF11_0331	TCP-1/cpn60 chaperonin family, putative		protein binding (GO:0005515);ATP binding (GO:0005524);unfolded protein binding (GO:0051082)	protein folding (GO:0006457);cytoskeleton organization (GO:0007010);cellular protein metabolic process (GO:0044267)	chaperonin-containing T-complex (GO:0005832)	0	94.8529	95.2206	49.2647	68.61	86.95
conserved in all	PF10_0300	RNA methyltransferase, putative		RNA binding (GO:0003723);RNA methyltransferase activity (GO:0008173)	RNA processing (GO:0006396)		0	47.37	53.49	45	40.613	52.4904
conserved in all	PFL1460c	conserved Plasmodium protein, unknown function		transferase activity (GO:0016740)			0	62.84	63.24	66.9231	67.1815	66.41
conserved in all	PFF1450w	sec14-like cytosolic factor or phosphatidylinositol/phosphatidylcholine transfer protein, putative		binding (GO:0005488)	vesicle-mediated transport (GO:0016192)	Golgi apparatus (GO:0005794)	0	71.04	68.2927	60.061	57.93	62.614
specific to pfal	PF14_0297	apyrase, putative		hydrolase activity (GO:0016787);nucleoside-diphosphatase activity (GO:0017110);nucleoside-triphosphatase activity (GO:0017111)		membrane (GO:0016020)	0	12.2286	12.4571	7.09	13.03	10.7551
conserved in all	PFL1465c	heat shock protein hslv		ATP-dependent peptidase activity (GO:0004176);threonine-type endopeptidase activity (GO:0004298);HslUV protease activity (GO:0009377)	response to unfolded protein (GO:0006986);response to heat (GO:0009408);proteolysis involved in cellular protein catabolic process (GO:0051603)	cytosol (GO:0005829);proteasome core complex (GO:0005839)	0	88.41	88.41	85.51	90.34	90.82
conserved in all	PFF1455c	CPW-WPC family protein					0	63.2509	62.5442	49.64	56.94	57.86
conserved in all	PF08_0006	prohibitin, putative			regulation of cell proliferation (GO:0042127)	membrane (GO:0016020)	0	94.49	94.12	91.9118	94.12	93.3824
conserved in all	MAL8P1.10	conserved protein, unknown function					0	81.9444	81.4815	79.63	77.78	79.63
conserved in all	PF14_0300	syntaxin, Qa-SNARE family		SNAP receptor activity (GO:0005484);protein binding (GO:0005515)	intracellular protein transport (GO:0006886);vesicle-mediated transport (GO:0016192);regulation of vesicle fusion (GO:0031338)	plasma membrane (GO:0005886);membrane (GO:0016020);SNARE complex (GO:0031201)	0	41.7	45.07	44.1176	41.18	63.1222
conserved in all	PFF1465w	secreted ookinete protein, putative		nucleotide binding (GO:0000166)		cytoplasm (GO:0005737)	0	77.7778	78.52	48.1481	72.59	71.32
conserved in all	PF11_0336	pre-mRNA splicing factor, putative					0	56.99	56.89	46.89	56.7358	54.6632
specific to pfal	MAL8P1.7	conserved Plasmodium protein, unknown function		motor activity (GO:0003774);actin binding (GO:0003779);ATP binding (GO:0005524)		cytoplasm (GO:0005737);myosin complex (GO:0016459)	0	13.1479	13.3648	7.25879	5.90889	9.52
conserved in all	MAL7P1.153	actin-like protein, putative		protein binding (GO:0005515)			0	47.74	49.7297	47.2949	42.3759	44.1125
conserved in all	PF07_0119	conserved Plasmodium protein, unknown function				cytoplasm (GO:0005737)	0	78.2	74.6606	80.0948	77.73	73.93
conserved in all	PF11_0339	glycine cleavage H protein			glycine catabolic process (GO:0006546)	mitochondrion (GO:0005739);glycine cleavage complex (GO:0005960)	0	66	65	63.68	45.5	62.6214
conserved in all	MAL13P1.159	thioredoxin, putative					0	76.699	78.16	42.233	80.5825	79.13
conserved in all	PFI1545c	proteasome precursor, putative		threonine-type endopeptidase activity (GO:0004298)	proteolysis involved in cellular protein catabolic process (GO:0051603)	proteasome core complex (GO:0005839)	0	70.6714	71.38	74.82	75.53	74.47
conserved in all	PFI1550c	conserved Plasmodium protein, unknown function					0	53.76	55.64	55.93	55.56	56.67
conserved in all	PF11_0340	conserved Plasmodium protein, unknown function		voltage-gated potassium channel activity (GO:0005249);protein binding (GO:0005515);potassium ion binding (GO:0030955)	potassium ion transport (GO:0006813)	plasma membrane (GO:0005886);voltage-gated potassium channel complex (GO:0008076);integral to membrane (GO:0016021)	0	75.8621	75.8621	68.97	72.41	72.41
conserved in all	PFL1500w	Rab GTPase 2		GTPase activity (GO:0003924);protein binding (GO:0005515);GTP binding (GO:0005525)	intracellular protein transport (GO:0006886);ER to Golgi vesicle-mediated transport (GO:0006888);nucleocytoplasmic transport (GO:0006913);signal transduction (GO:0007165);small GTPase mediated signal transduction (GO:0007264);protein transport (GO:0015031);regulation of vesicle-mediated transport (GO:0060627)	intracellular (GO:0005622);vacuole (GO:0005773);membrane (GO:0016020)	0	97.6526	97.6526	97.1831	97.1831	94.37
conserved in all	MAL13P1.163-a	ER lumen protein retaining receptor 1, putative		ER retention sequence binding (GO:0046923)	protein retention in ER lumen (GO:0006621)	integral to membrane (GO:0016021)	0	96.13	94.37	54.5775	88.7324	88.7324
conserved in all	PF10_0311	protein phosphatase inhibitor, putative					0	65.812	65.812	42.11	43.1	48.28
conserved in all	PFI1565w	profilin, putative		actin binding (GO:0003779)	cytoskeleton organization (GO:0007010)	actin cytoskeleton (GO:0015629)	0	86.13	85.55	76	73.71	77.14
conserved in all	PF14_0309	protein-L-isoaspartate O-methyltransferase beta-aspartate methyltransferase, putative		protein-L-isoaspartate (D-aspartate) O-methyltransferase activity (GO:0004719)	protein modification process (GO:0006464);protein repair (GO:0030091)		0	78.3333	77.0833	73.3333	81.3278	79.58
conserved in all	MAL13P1.164	elongation factor Tu, putative		translation elongation factor activity (GO:0003746);GTPase activity (GO:0003924);GTP binding (GO:0005525)	translational elongation (GO:0006414)	intracellular (GO:0005622)	0	72.67	74.3083	75.64	74.1107	62.97
conserved in all	PFF1505w	TRAP-like protein, putative					0	72.1649	71.82	57.8431	59.3	51.74
conserved in all	PF14_0784	ribosome biogenesis protein, NOP10-like					0	85.4545	89.09	85.45	85.4545	81.82
specific to pfal	PFF1510w	Plasmodium exported protein (PHISTb), unknown function		GTPase activity (GO:0003924);GTP binding (GO:0005525)		cytoplasm (GO:0005737)	0	7.08	13.0526	10.6632	13.09	13.03
conserved in all	PF14_0311	SF-assemblin, putative		structural constituent of cytoskeleton (GO:0005200)			0	55.39	61.34	61.6236	52.4116	63.57
conserved in all	PFI1585c	mitochondrial ribosomal protein S6 precursor, putative		structural constituent of ribosome (GO:0003735)	translation (GO:0006412)	intracellular (GO:0005622);ribosome (GO:0005840);apicoplast (GO:0020011)	0	44.4444	52.36	53.52	53.05	44.7
conserved in all	PFL1520w	DIM1 protein homolog, putative			spliceosome assembly (GO:0000245);RNA splicing, via transesterification reactions (GO:0000375);mitosis (GO:0007067)	spliceosomal complex (GO:0005681)	0	94.24	94.24	93.53	93.53	93.53
conserved in all	MAL7P1.159	1-cys peroxiredoxin		antioxidant activity (GO:0016209);oxidoreductase activity (GO:0016491)	response to oxidative stress (GO:0006979)	apicoplast (GO:0020011)	0	71.25	73.3333	70	72.08	73.33
conserved in all	PF10_0316	N-acetylglucosaminyl-phosphatidylinositol biosynthetic protein, putative		catalytic activity (GO:0003824)	GPI anchor biosynthetic process (GO:0006506);biosynthetic process (GO:0009058)	membrane (GO:0016020)	0	80.91	81.34	57.92	68.55	73.1
conserved in all	PF10_0317	DER1-like protein, putative		ATPase activity (GO:0016887)	regulation of cell cycle process (GO:0010564);ER-associated protein catabolic process (GO:0030433)	endoplasmic reticulum (GO:0005783);integral to membrane (GO:0016021)	0	87.0722	86.692	45.63	77.19	83.6502
specific to pfal	MAL8P1.3	Plasmodium exported protein (hyp9), unknown function				integral to membrane (GO:0016021)	0	0	2.54972	0	0	0
conserved in all	MAL13P1.167	signal peptidase 21 kDa subunit		peptidase activity (GO:0008233);signal peptidase activity (GO:0009003)	signal peptide processing (GO:0006465);proteolysis (GO:0006508)	signal peptidase complex (GO:0005787);membrane (GO:0016020)	0	83.7	83.1522	82.07	83.7	45.65
specific to pfal	PFE1600w	Plasmodium exported protein (PHISTb), unknown function				membrane (GO:0016020)	0	10.81	13.56	11.79	14.44	8.64
conserved in all	PF11_0348	RNA (uracil-5-)methyltransferase, putative		RNA methyltransferase activity (GO:0008173)	RNA processing (GO:0006396)		0	55.43	57.01	44.43	50.9281	55.31
conserved in all	MAL7P1.160-a	conserved Plasmodium protein, unknown function					0	87.7301	88.3436	76.07	74.23	77.91
specific to pfal	PFE1605w	Plasmodium exported protein (PHISTb), unknown function					0	14.83	14.77	11.55	14.39	12.87
specific to pfal	PF08_0002	surface-associated interspersed gene 8.2 (SURFIN8.2)					0	9.86938	8.41849	5.47	7.42	4.5388
conserved in all	MAL13P1.168	protein tyrosine phosphatase, putative					0	72.37	73.25	48.6842	60.53	61.84
specific to pfal	PF08_0001	Plasmodium exported protein, unknown function				apicoplast (GO:0020011)	0	1.78295	12.44	7.95796	2.00218	14.43
conserved in all	PF10_0321	conserved Plasmodium protein, unknown function			phosphate transport (GO:0006817)	extracellular region (GO:0005576);cytoplasm (GO:0005737);membrane (GO:0016020)	0	45.55	47.36	50.1742	49.7382	50.7
conserved in all	PF13_0171	60S ribosomal protein L23, putative		structural constituent of ribosome (GO:0003735)	translation (GO:0006412)	intracellular (GO:0005622);ribosome (GO:0005840)	0	98.5612	98.5612	71.22	98.5612	98.5612
specific to pfal	PFE1630w	rifin			antigenic variation (GO:0020033)	membrane (GO:0016020);host cell plasma membrane (GO:0020002)	0	0	11.7647	7.58988	5.87139	11.0656
conserved in all	MAL13P1.169	syntaxin, Qa-SNARE family		SNAP receptor activity (GO:0005484);protein binding (GO:0005515)	intracellular protein transport (GO:0006886);vesicle-mediated transport (GO:0016192);regulation of vesicle fusion (GO:0031338)	endoplasmic reticulum (GO:0005783);cis-Golgi network (GO:0005801);membrane (GO:0016020);SNARE complex (GO:0031201)	0	82.5623	82.92	78.8732	63.12	69.82
specific to pfal	PFF1545w	rifin			antigenic variation (GO:0020033)	membrane (GO:0016020);host cell plasma membrane (GO:0020002)	0	1.28934	0	9.64912	5.94315	5.30973
conserved in all	PFL1545c	chaperonin, cpn60		binding (GO:0005488);protein binding (GO:0005515);ATP binding (GO:0005524);unfolded protein binding (GO:0051082)	protein folding (GO:0006457);cellular protein metabolic process (GO:0044267)	apicoplast (GO:0020011)	0	86.37	87.4826	67.18	87.48	65.18
specific to pfal	PFF1550w	stevor				membrane (GO:0016020);Maurer's cleft (GO:0020036)	0	10.5839	10.4015	13.4426	10.4575	1.28671
specific to pfal	MAL8P1.1	surface-associated interspersed gene 8.1, (SURFIN8.1)					0	11.5762	9.81308	11.8626	7.33993	11.35
conserved in all	PFL1550w	lipoamide dehydrogenase		catalytic activity (GO:0003824);dihydrolipoyl dehydrogenase activity (GO:0004148);oxidoreductase activity (GO:0016491);protein homodimerization activity (GO:0042803);cofactor binding (GO:0048037);FAD binding (GO:0050660)	cell redox homeostasis (GO:0045454);electron transport (GO:0006118)	cytoplasm (GO:0005737);mitochondrial matrix (GO:0005759);3-methyl-2-oxobutanoate dehydrogenase (lipoamide) complex (GO:0017086)	0	73.83	78.56	78.29	62.38	78.45
specific to pfal	PFF1555w	rifin			antigenic variation (GO:0020033)	membrane (GO:0016020);host cell plasma membrane (GO:0020002)	0	1.67622	7.86106	10.5364	7.32197	1.82635
conserved in all	PFL1555w	cytochrome b5, putative		electron carrier activity (GO:0009055);heme binding (GO:0020037)	electron transport (GO:0006118)	mitochondrion (GO:0005739);membrane (GO:0016020)	0	56.33	58.12	57.3248	59.24	59.87
conserved in all	PF13_0174	sedlin, putative			transport (GO:0006810);ER to Golgi vesicle-mediated transport (GO:0006888);vesicle-mediated transport (GO:0016192)	intracellular (GO:0005622)	0	68.6047	69.88	77.9141	70.11	46.6258
specific to pfal	PFE1640w	erythrocyte membrane protein 1 (PfEMP1), truncated		receptor activity (GO:0004872)	pathogenesis (GO:0009405)	integral to membrane (GO:0016021)	0	6.57396	6.66877	1.52	4.49	5.91
conserved in all	PF10_0324	conserved Plasmodium protein, unknown function				cytoplasm (GO:0005737)	0	82.79	80.33	55.2846	74.5902	77.05
specific to pfal	PFF1560c	rifin			antigenic variation (GO:0020033)	membrane (GO:0016020);host cell plasma membrane (GO:0020002)	0	4.76534	7.12166	13.3663	10.9649	10.22
conserved in all	PF10_0325	haloacid dehalogenase-like hydrolase, putative		catalytic activity (GO:0003824);hydrolase activity (GO:0016787)	metabolic process (GO:0008152)		0	58.68	57.2414	52.43	56.9444	46.1806
conserved in all	PF11_0355	conserved Plasmodium protein, unknown function				membrane (GO:0016020)	0	82.1839	83.3333	80.46	79.89	80.46
conserved in all	PFI1640c	conserved Plasmodium protein, unknown function		magnesium ion binding (GO:0000287);RNA binding (GO:0003723);DNA-directed DNA polymerase activity (GO:0003887);aspartic-type endopeptidase activity (GO:0004190);ribonuclease H activity (GO:0004523);ATP binding (GO:0005524);peptidase activity (GO:0008233);zinc ion binding (GO:0008270);nucleotidyltransferase activity (GO:0016779)	DNA recombination (GO:0006310);proteolysis (GO:0006508);DNA integration (GO:0015074);transposition (GO:0032196)	nucleus (GO:0005634);cytoplasm (GO:0005737)	0	41.67	42.07	46.83	50.3968	40.65
specific to pfal	PFF1565c	rifin			antigenic variation (GO:0020033)	membrane (GO:0016020);host cell plasma membrane (GO:0020002)	0	0	2.05242	12.7321	12.3967	6.37
conserved in all	PF14_0317	microsomal signal peptidase protein, putative		peptidase activity (GO:0008233);signal peptidase activity (GO:0009003)	signal peptide processing (GO:0006465)	signal peptidase complex (GO:0005787);microsome (GO:0005792);integral to membrane (GO:0016021)	0	53.47	55.45	56.44	57.43	58.42
conserved in all	PF13_0175	conserved protein, unknown function				cytoplasm (GO:0005737)	0	58.952	61.93	44.5	62.84	44.44
conserved in all	PF13_0176	apurinic/apyrimidinic endonuclease Apn1, putative		DNA binding (GO:0003677);endonuclease activity (GO:0004519);zinc ion binding (GO:0008270)	DNA repair (GO:0006281)	intracellular (GO:0005622)	0	45.86	46.77	44.22	48.16	51.0033
conserved in all	MAL7P1.164	adapter-related protein, putative		binding (GO:0005488);protein binding (GO:0005515);protein transporter activity (GO:0008565)	intracellular protein transport (GO:0006886);protein transport (GO:0015031);vesicle-mediated transport (GO:0016192)	membrane coat (GO:0030117);clathrin coat of trans-Golgi network vesicle (GO:0030130);clathrin adaptor complex (GO:0030131)	0	72.73	73.89	51.4	70.31	53.96
specific to pfal	PFF1570w	rifin			antigenic variation (GO:0020033)	membrane (GO:0016020);host cell plasma membrane (GO:0020002)	0	0	5.29	6.24458	8.46774	13.6919
conserved in all	PFI1650w	DNA excision-repair helicase, putative		nucleic acid binding (GO:0003676);DNA binding (GO:0003677);ATP-dependent DNA helicase activity (GO:0004003);ATP binding (GO:0005524);ATP-dependent helicase activity (GO:0008026)	nucleotide-excision repair (GO:0006289)	nucleus (GO:0005634)	0	65.53	66.92	48.1168	40.44	53.82
conserved in all	PFI1660w	conserved Plasmodium protein, unknown function				cytoplasm (GO:0005737)	0	55.41	57.43	60.274	61.6438	60.96
conserved in all	PF13_0178	translation initiation factor 6, putative		ribosome binding (GO:0043022)	mature ribosome assembly (GO:0042256)		0	94.332	93.12	72.18	92.7126	91.9028
conserved in all	PFI1665w	transcription factor with AP2 domain(s), putative		transcription factor activity (GO:0003700)	regulation of transcription, DNA-dependent (GO:0006355)		0	77	81.59	46	79.15	69.8113
conserved in all	PFI1670c	vacuolar ATP synthase subunit e, putative		proton-transporting ATPase activity, rotational mechanism (GO:0046961)	ATP synthesis coupled proton transport (GO:0015986)	proton-transporting two-sector ATPase complex, catalytic domain (GO:0033178)	0	88.5106	88.09	86.38	57.87	87.23
specific to pfal	PFF1575w	rifin			antigenic variation (GO:0020033)	membrane (GO:0016020);host cell plasma membrane (GO:0020002)	0	11.4883	5.07309	6.52174	9.09091	11.3269
conserved in all	PFL1580w	conserved Plasmodium protein, unknown function		binding (GO:0005488)			0	55.96	58.02	63.3	64.14	46.04
specific to pfal	MAL8P1.207	erythrocyte membrane protein 1, PfEMP1		receptor activity (GO:0004872);binding (GO:0005488);protein binding (GO:0005515);GTP binding (GO:0005525)	SRP-dependent cotranslational protein targeting to membrane (GO:0006614);pathogenesis (GO:0009405)	integral to membrane (GO:0016021)	0	10.24	6.19195	3.12	3.57444	5.06
conserved in all	PF10_0330	ubiquitin conjugating enzyme, putative		ubiquitin-protein ligase activity (GO:0004842);small conjugating protein ligase activity (GO:0019787)	ubiquitin-dependent protein catabolic process (GO:0006511);protein ubiquitination (GO:0016567);post-translational protein modification (GO:0043687);regulation of protein metabolic process (GO:0051246)		0	95.29	95.8115	54.4503	93.1937	91.24
conserved in all	PF10_0329	plasmepsin VII		aspartic-type endopeptidase activity (GO:0004190)	proteolysis (GO:0006508)	membrane (GO:0016020)	0	53.18	52.48	51.97	52.9536	53.43
conserved in all	PF13_0180	cochaperonin		ATP binding (GO:0005524)	protein folding (GO:0006457)	apicoplast (GO:0020011)	0	68.8462	67.6923	61.39	41.31	66.41
conserved in all	PFL1595w	conserved protein, unknown function					0	51.81	58.52	55.56	50.6329	58.52
conserved in all	PF07_0127	conserved Plasmodium protein, unknown function					0	72.1519	74.0506	58.0247	72.7848	72.15
specific to pfal	PFF1580c	erythrocyte membrane protein 1, PfEMP1		receptor activity (GO:0004872);cell adhesion molecule binding (GO:0050839)	pathogenesis (GO:0009405);cell-cell adhesion (GO:0016337);rosetting (GO:0020013);antigenic variation (GO:0020033);cytoadherence to microvasculature, mediated by parasite protein (GO:0020035)	integral to membrane (GO:0016021);host cell plasma membrane (GO:0020002);infected host cell surface knob (GO:0020030)	0	5.05689	5.25784	1.87	3.13448	3.46485
conserved in all	PF10_0331a	conserved Plasmodium protein, unknown function					0	59.1549	58.4507	43.57	45.45	59.29
conserved in all	PF10_0332	apicoplast ribosomal protein L27 precursor, putative		structural constituent of ribosome (GO:0003735)	translation (GO:0006412)	plastid large ribosomal subunit (GO:0000311);intracellular (GO:0005622);ribosome (GO:0005840);membrane (GO:0016020);apicoplast (GO:0020011)	0	53.02	53.2407	47.4419	53.49	53.7037
specific to pfal	MAL8P1.208	rifin					0	1.73232	8.53485	9.40666	10.2151	13.1016
conserved in all	PFI1685w	cAMP-dependent protein kinase catalytic subunit		protein kinase activity (GO:0004672);protein serine/threonine kinase activity (GO:0004674);protein tyrosine kinase activity (GO:0004713);ATP binding (GO:0005524)	protein amino acid phosphorylation (GO:0006468);cell differentiation (GO:0030154)		0	91.2536	90.09	83.09	80.7018	88.05
conserved in all	PF11_0358	DNA-directed RNA polymerase 1, subunit 2, putative		DNA binding (GO:0003677);DNA-directed RNA polymerase activity (GO:0003899);ribonucleoside binding (GO:0032549)	transcription (GO:0006350);transcription from RNA polymerase I promoter (GO:0006360)	DNA-directed RNA polymerase I complex (GO:0005736)	0	66.86	65.77	52.1625	46.09	52.17
conserved in all	PF11_0359	coatomer delta subunit, putative		protein binding (GO:0005515)	transport (GO:0006810);intracellular protein transport (GO:0006886);retrograde vesicle-mediated transport, Golgi to ER (GO:0006890);vesicle-mediated transport (GO:0016192)	cytoplasm (GO:0005737);clathrin adaptor complex (GO:0030131)	0	84.43	84.84	44.9393	78.18	66.6667
conserved in all	MAL13P1.171	transmembrane protein Tmp21 homologue, putative		protein transmembrane transporter activity (GO:0008320)	transport (GO:0006810);intracellular protein transport (GO:0006886)	membrane (GO:0016020);integral to membrane (GO:0016021);apicoplast (GO:0020011)	0	63.0841	63.55	61.6822	58.88	49.7696
conserved in all	PF10_0334	flavoprotein subunit of succinate dehydrogenase		succinate dehydrogenase (ubiquinone) activity (GO:0008177);electron carrier activity (GO:0009055);oxidoreductase activity (GO:0016491);FAD binding (GO:0050660)	tricarboxylic acid cycle (GO:0006099);electron transport chain (GO:0022900);oxidation reduction (GO:0055114)	mitochondrion (GO:0005739);mitochondrial respiratory chain complex II (GO:0005749)	0	87.2038	86.89	55.1506	52.2979	66.0856
conserved in all	PF14_0323	calmodulin		calcium ion binding (GO:0005509);enzyme binding (GO:0019899)			0	99.33	99.33	98.66	98.66	98.66
conserved in all	MAL13P1.172	conserved protein, unknown function					0	64.29	64.71	62.61	59.2	60.9244
specific to pfal	PFF1590w	rifin				host cell plasma membrane (GO:0020002)	0	4.73293	4.6133	9.01857	12.0968	0
conserved in all	PFI1705w	phosphatidylinositol N-acetylglucosaminyltransferase subunit P, putative					0	75.21	72.73	63.64	64.46	47.11
absent in pkno	PF11_0361-a	conserved Plasmodium protein, unknown function					0	55.16	2.50934	15.02	17.6	46.78
specific to pfal	MAL8P1.216	rifin					0	0	0.936123	11.2717	10.1156	10.6936
specific to pfal	PFF1595c	erythrocyte membrane protein 1, PfEMP1		receptor activity (GO:0004872);cell adhesion molecule binding (GO:0050839)	pathogenesis (GO:0009405);cell-cell adhesion (GO:0016337);rosetting (GO:0020013);antigenic variation (GO:0020033);cytoadherence to microvasculature, mediated by parasite protein (GO:0020035)	integral to membrane (GO:0016021);outer membrane (GO:0019867);host cell plasma membrane (GO:0020002);infected host cell surface knob (GO:0020030)	0	8.75391	9.37919	4.47	6.20813	6.07685
conserved in all	PF10_0337	ADP-ribosylation factor, putative		transporter activity (GO:0005215);GTP binding (GO:0005525)	intracellular protein transport (GO:0006886);small GTPase mediated signal transduction (GO:0007264);protein transport (GO:0015031)	intracellular (GO:0005622)	0	89.89	88.2022	62.36	88.764	89.33
conserved in all	PF13_0185	histone H3 variant, putative		DNA binding (GO:0003677)	chromatin assembly or disassembly (GO:0006333);nucleosome assembly (GO:0006334)	nucleosome (GO:0000786);nucleus (GO:0005634)	0	71.345	72.8324	70.5882	68.24	68.24
specific to pfal	MAL8P1.217	stevor					0	2.94416	2.61273	6.77541	11.9205	1.70629
specific to pfal	PFL1600c	conserved Plasmodium protein, unknown function				cytoplasm (GO:0005737)	0	11.4215	14.5938	6.20106	6.38498	9.33126
conserved in all	PF13_0186	conserved Plasmodium protein, unknown function				nucleus (GO:0005634)	0	50.41	49.17	52.2634	53.4413	52.6531
conserved in all	PF10_0338	conserved Plasmodium protein, unknown function				membrane (GO:0016020)	0	67.7233	74.3034	48.92	65.12	60.06
specific to pfal	MAL8P1.218	rifin					0	9.17266	8.981	7.88288	10.7256	3.60256
specific to pfal	MAL8P1.219	rifin					0	10.9015	9.93377	0	10.5911	5.26
specific to pfal	MAL8P1.220	erythrocyte membrane protein 1, PfEMP1		receptor activity (GO:0004872)	pathogenesis (GO:0009405)	integral to membrane (GO:0016021)	0	8.6139	8.83253	4.59	4.9847	5.90551
specific to pfal	MAL7P1.171	Plasmodium exported protein, unknown function					0	9.72	0.76	4.02844	4.27	4.98
specific to pfal	PF10_0342	probable protein, unknown function		ATP binding (GO:0005524)		nucleus (GO:0005634)	0	12.8342	12.656	13.3	12.06	13.4
conserved in all	PFL1630c	conserved Plasmodium protein, unknown function		catalytic activity (GO:0003824);ATP binding (GO:0005524);metal ion binding (GO:0046872)	metabolic process (GO:0008152)	membrane (GO:0016020)	0	59.5349	53.47	64.49	68.45	67.76
specific to pfal	MAL7P1.174	Plasmodium exported protein (PHISTb), unknown function		transferase activity (GO:0016740)		Maurer's cleft (GO:0020036)	0	8.83281	11.4865	12.5749	12.114	9.78
conserved in all	PF14_0329	conserved protein, unknown function		protein binding (GO:0005515)		mitochondrial matrix (GO:0005759)	0	85.04	83.4646	80.16	80.9524	80.56
conserved in all	PF14_0331	cytochrome c oxidase assembly protein, putative			protein complex assembly (GO:0006461);respiratory chain complex IV assembly (GO:0008535)	mitochondrion (GO:0005739);mitochondrial inner membrane (GO:0005743);membrane (GO:0016020)	0	71.93	73.2719	61.1111	67.6674	69.21
specific to pfal	PF10_0348	duffy binding-like merozoite surface protein		receptor activity (GO:0004872)	pathogenesis (GO:0009405);cell-cell adhesion (GO:0016337)	cell surface (GO:0009986);integral to membrane (GO:0016021)	0	13.1603	11.8557	8.30946	11.4778	10.114
specific to primate	PFI1745c	early transcribed membrane protein				apicoplast (GO:0020011)	0	43.8503	44.39	10.8949	2.31335	6.85841
conserved in all	PFL1655c	DNA polymerase epsilon subunit b, putative		DNA binding (GO:0003677);DNA-directed DNA polymerase activity (GO:0003887)	DNA replication (GO:0006260)	nucleus (GO:0005634)	0	73.9617	75.9615	61.27	70.88	81.09
specific to pfal	PF10_0350	probable protein, unknown function					0	12.0787	8.3151	13.87	12.61	11.5
specific to pfal	PF11_0377-c	casein kinase 1		protein kinase activity (GO:0004672);protein serine/threonine kinase activity (GO:0004674);protein tyrosine kinase activity (GO:0004713);ATP binding (GO:0005524)	protein amino acid phosphorylation (GO:0006468)		0	11.7647	11.7647	5.39542	10.05	12.32
specific to pfal	PF07_0130	stevor				membrane (GO:0016020);Maurer's cleft (GO:0020036)	0	2.26481	4.1358	11.1111	8.97666	11.6129
specific to pfal	PF10_0355	merozoite surface protein		receptor activity (GO:0004872)	pathogenesis (GO:0009405)	integral to membrane (GO:0016021)	0	13.5562	13.8	10.86	10.4712	11.49
conserved in all	PF10_0358	conserved Plasmodium protein, unknown function		nucleotide binding (GO:0000166)		cytoplasm (GO:0005737)	0	71.3636	74.21	73.64	75.91	75.45
specific to pfal	PF07_0132	rifin			antigenic variation (GO:0020033)	membrane (GO:0016020);host cell plasma membrane (GO:0020002)	0	0	1.43422	5.91806	10.1887	7.60309
conserved in all	PF10_0359	conserved Plasmodium protein, unknown function			cell redox homeostasis (GO:0045454)	membrane (GO:0016020);apicoplast (GO:0020011)	0	71.028	69.6262	56.87	68.72	71.56
specific to pfal	MAL7P1.184	rifin			antigenic variation (GO:0020033)	membrane (GO:0016020);host cell plasma membrane (GO:0020002)	0	3.66732	5.17845	9.03226	12.68	7.69
conserved in all	PF11_0379	conserved Plasmodium protein, unknown function				cytoplasm (GO:0005737)	0	53.05	53.26	48.27	52.7907	51.16
specific to pfal	PF07_0134	rifin			antigenic variation (GO:0020033)	membrane (GO:0016020);host cell plasma membrane (GO:0020002)	0	0	4.87805	10.4822	5.90648	12.4675
conserved in all	MAL13P1.178	conserved Plasmodium protein, unknown function					0	67.55	65.62	65.4501	64.1646	63.9225
conserved in all	MAL13P1.177	conserved Plasmodium protein, unknown function			DNA replication (GO:0006260)	nucleus (GO:0005634)	0	72.1443	74.35	67.79	69.54	43.2
specific to pfal	MAL7P1.185	rifin			antigenic variation (GO:0020033)	membrane (GO:0016020);host cell plasma membrane (GO:0020002)	0	5.70175	8.60215	11.4362	13.8539	8.87656
conserved in all	PF14_0341	glucose-6-phosphate isomerase		glucose-6-phosphate isomerase activity (GO:0004347)	gluconeogenesis (GO:0006094);glycolysis (GO:0006096);pentose-phosphate shunt (GO:0006098)		0	78.0936	78.49	64.1509	68.31	47.79
conserved in all	PFL1695c	conserved Plasmodium protein, unknown function					0	68.06	68.06	45.07	70.83	70.8333
specific to pfal	PF07_0136	rifin			antigenic variation (GO:0020033)	membrane (GO:0016020);host cell plasma membrane (GO:0020002)	0	9.47075	6.32124	8.6351	6.69413	6.83491
conserved in all	PF11_0382	mitochondrial ribosomal protein S9 precursor, putative		structural constituent of ribosome (GO:0003735)	translation (GO:0006412)	intracellular (GO:0005622);mitochondrion (GO:0005739);ribosome (GO:0005840);small ribosomal subunit (GO:0015935)	0	65.33	66.7763	67.88	67	60.67
specific to pfal	MAL7P1.186	var-like erythrocyte membrane protein 1			antigenic variation (GO:0020033)	membrane (GO:0016020);host cell plasma membrane (GO:0020002)	0	0	8.16714	15.52	8.63931	12.74
specific to pfal	PF07_0138	rifin			antigenic variation (GO:0020033)	membrane (GO:0016020);host cell plasma membrane (GO:0020002)	0	4.04218	6.51387	9.21544	6.21963	6.28627
specific to pfal	PFI1790w	Plasmodium exported protein (PHISTb), unknown function		unfolded protein binding (GO:0051082)	protein folding (GO:0006457)	plasma membrane (GO:0005886)	0	8.96	12.1951	14.57	10.4459	14.01
conserved in all	MAL13P1.179	conserved Plasmodium protein, unknown function				cytoplasm (GO:0005737)	0	65.19	64.7343	53.8847	51	48.1203
specific to primate	PF10_0362	DNA polymerase zeta catalytic subunit, putative		nucleotide binding (GO:0000166);nucleic acid binding (GO:0003676);DNA binding (GO:0003677);DNA-directed DNA polymerase activity (GO:0003887)	DNA replication (GO:0006260)	membrane (GO:0016020);zeta DNA polymerase complex (GO:0016035)	0	42.5646	43.09	7.81875	10	9.95113
specific to pfal	PFI1805w	rifin			antigenic variation (GO:0020033)	membrane (GO:0016020);host cell plasma membrane (GO:0020002)	0	4.85372	0	3.47594	13.7131	0
conserved in all	PF11_0386	apicoplast ribosomal protein S14p/S29e precursor, putative		structural constituent of ribosome (GO:0003735)	translation (GO:0006412)	intracellular (GO:0005622);ribosome (GO:0005840);small ribosomal subunit (GO:0015935);apicoplast (GO:0020011)	0	69.3642	67.052	68.7861	58.72	68.79
conserved in all	PF13_0202	conserved Plasmodium protein, unknown function				cytoplasm (GO:0005737)	0	57.05	56.13	54.49	44.85	55.56
specific to pfal	PFI1810w	rifin			antigenic variation (GO:0020033)	membrane (GO:0016020);host cell plasma membrane (GO:0020002)	0	0	10.03	11.9919	12.6794	11.39
conserved in all	MAL13P1.181	conserved Plasmodium membrane protein, unknown function					0	58.77	57.54	55.8912	54.91	53.99
conserved in all	PF10_0366	ADP/ATP transporter on adenylate translocase		transporter activity (GO:0005215);ATP:ADP antiporter activity (GO:0005471);binding (GO:0005488)	transport (GO:0006810)	mitochondrial inner membrane (GO:0005743);membrane (GO:0016020)	0	94.3522	92.03	90.0332	74.67	91.3621
specific to pfal	PFI1815c	rifin			antigenic variation (GO:0020033)	membrane (GO:0016020);host cell plasma membrane (GO:0020002)	0	2.20109	7.58808	11.6162	8.84848	0
specific to pfal	MAL7P1.187	erythrocyte membrane protein 1, PfEMP1		receptor activity (GO:0004872);cell adhesion molecule binding (GO:0050839)	pathogenesis (GO:0009405);cell-cell adhesion (GO:0016337);rosetting (GO:0020013);antigenic variation (GO:0020033);cytoadherence to microvasculature, mediated by parasite protein (GO:0020035)	integral to membrane (GO:0016021);outer membrane (GO:0019867);host cell plasma membrane (GO:0020002);infected host cell surface knob (GO:0020030)	0	7.66859	8.43606	5.93449	4.89403	5.78
conserved in all	MAL13P1.183	conserved Plasmodium protein, unknown function		cytochrome-c oxidase activity (GO:0004129);copper ion binding (GO:0005507);electron carrier activity (GO:0009055);heme binding (GO:0020037)	respiratory electron transport chain (GO:0022904)	mitochondrial inner membrane (GO:0005743);mitochondrial respiratory chain (GO:0005746);integral to membrane (GO:0016021)	0	93.41	94.5055	90.1099	95.6	94.51
conserved in all	PF13_0204	nuclear movement protein, putative					0	61.3232	62.44	63.2124	57.25	54.9223
conserved in all	PFL1720w	serine hydroxymethyltransferase		glycine hydroxymethyltransferase activity (GO:0004372)	glycine metabolic process (GO:0006544);L-serine metabolic process (GO:0006563);one-carbon metabolic process (GO:0006730)		0	83.2579	83.0317	66.7421	78.0543	78.05
specific to pfal	PFI1820w	erythrocyte membrane protein 1, PfEMP1		receptor activity (GO:0004872)	pathogenesis (GO:0009405)	integral to membrane (GO:0016021)	0	11.8819	11.6173	5.02	8.82129	8.44106
conserved in all	PF10_0368	dynamin-like protein		microtubule motor activity (GO:0003777);GTPase activity (GO:0003924);GTP binding (GO:0005525)	receptor-mediated endocytosis (GO:0006898);microtubule-based process (GO:0007017)	endoplasmic reticulum (GO:0005783);Golgi apparatus (GO:0005794);microtubule associated complex (GO:0005875);apicoplast (GO:0020011)	0	89.56	89.56	53.38	48.8011	87.31
conserved in all	PF14_0345b	conserved protein, unknown function		GTP binding (GO:0005525)		intracellular (GO:0005622)	0	63.59	65.05	62.93	67.51	66.13
conserved in all	PF13_0205	tryptophan--tRNA ligase, putative		nucleotide binding (GO:0000166);aminoacyl-tRNA ligase activity (GO:0004812);tryptophan-tRNA ligase activity (GO:0004830);ATP binding (GO:0005524)	translation (GO:0006412);tRNA aminoacylation for protein translation (GO:0006418);tryptophanyl-tRNA aminoacylation (GO:0006436)	cytoplasm (GO:0005737);apicoplast (GO:0020011)	0	80.3406	79.6325	41.7957	43.04	62.98
specific to pfal	PFI1825w	rifin			antigenic variation (GO:0020033)	membrane (GO:0016020);host cell plasma membrane (GO:0020002)	0	2.27808	10.2273	4.20776	11.17	2.00599
conserved in all	PF14_0346	cGMP-dependent protein kinase		protein kinase activity (GO:0004672);protein serine/threonine kinase activity (GO:0004674);cGMP-dependent protein kinase activity (GO:0004692);protein tyrosine kinase activity (GO:0004713);ATP binding (GO:0005524);cAMP-dependent protein kinase regulator activity (GO:0008603)	regulation of protein amino acid phosphorylation (GO:0001932);protein amino acid phosphorylation (GO:0006468)	cAMP-dependent protein kinase complex (GO:0005952)	0	91.32	91.5592	68.5815	49.12	70.61
conserved in all	PF11_0393	ubiquitin related modifier homologue					0	71.43	70.6349	73.02	72.2222	71.43
specific to pfal	PFI1830c	erythrocyte membrane protein 1, PfEMP1		receptor activity (GO:0004872);iron ion binding (GO:0005506);electron carrier activity (GO:0009055);heme binding (GO:0020037);cell adhesion molecule binding (GO:0050839)	pathogenesis (GO:0009405);cell-cell adhesion (GO:0016337);rosetting (GO:0020013);antigenic variation (GO:0020033);cytoadherence to microvasculature, mediated by parasite protein (GO:0020035)	integral to membrane (GO:0016021);outer membrane (GO:0019867);host cell plasma membrane (GO:0020002);infected host cell surface knob (GO:0020030)	0	8.78587	9.71302	4.95	5.21201	8.61
conserved in all	PF11_0394	conserved Plasmodium membrane protein, unknown function			transport (GO:0006810)	plasma membrane (GO:0005886);integral to membrane (GO:0016021)	0	74.1935	73.12	67.7419	68.28	69.89
conserved in all	PF14_0348	ATP-dependent Clp protease proteolytic subunit, putative		serine-type endopeptidase activity (GO:0004252);endopeptidase Clp activity (GO:0008462)	proteolysis (GO:0006508)	apicoplast (GO:0020011)	0	69.4779	70.87	62.7049	77.2358	67.4797
conserved in all	PF10_0372-a	antigen UB05					0	72.73	72.73	60	69.4215	40.83
conserved in all	PFL1745c	clustered-asparagine-rich protein		nucleic acid binding (GO:0003676);RNA binding (GO:0003723);protein binding (GO:0005515)			0	54.44	56.73	46.0803	46.86	67.49
specific to pfal	PF10_0374	Pf11-1 protein		calcium-dependent cysteine-type endopeptidase activity (GO:0004198);protein binding (GO:0005515);GTP binding (GO:0005525)	proteolysis (GO:0006508);SRP-dependent cotranslational protein targeting to membrane (GO:0006614);gamete generation (GO:0007276)	intracellular (GO:0005622)	0	1.04548	4.26	1	0.51	0.74
conserved in all	PFL1770c	conserved Plasmodium protein, unknown function					0	76.9737	78.29	71.7105	59.87	72.37
conserved in all	PF14_0358	41-2 protein antigen precursor,transport protein particle (TRAPP) component, Bet3				host cell plasma membrane (GO:0020002)	0	78.92	82.07	80.9783	69.57	53.2609
conserved in all	PF13_0211	calcium dependent protein kinase 5		protein kinase activity (GO:0004672);protein serine/threonine kinase activity (GO:0004674);calmodulin-dependent protein kinase activity (GO:0004683);protein tyrosine kinase activity (GO:0004713);calcium ion binding (GO:0005509);ATP binding (GO:0005524)	protein amino acid phosphorylation (GO:0006468)		0	87.3239	87.15	67.3077	41.0839	40.59
conserved in all	PFL1785c	conserved Plasmodium protein, unknown function				membrane (GO:0016020)	0	54.55	55.47	53.4392	57.53	57.26
conserved in all	PF13_0212	conserved Plasmodium protein, unknown function		serine-tRNA ligase activity (GO:0004828);ATP binding (GO:0005524)	translation (GO:0006412);seryl-tRNA aminoacylation (GO:0006434);selenocysteine biosynthetic process (GO:0016260)	cytoplasm (GO:0005737)	0	43.36	46.46	45.6432	46.02	49.12
conserved in all	PF13_0213	60S ribosomal protein L6-2, putative		structural constituent of ribosome (GO:0003735)	translation (GO:0006412)	intracellular (GO:0005622);ribosome (GO:0005840);cytosolic large ribosomal subunit (GO:0022625)	0	71.43	72.4	63.4	64.94	64.1026
specific to pfal	PF13_0210	conserved Plasmodium protein, unknown function		receptor activity (GO:0004872);calcium ion binding (GO:0005509)	endocytosis (GO:0006897)	extracellular region (GO:0005576);membrane (GO:0016020);integral to membrane (GO:0016021)	0	13.5669	14.2386	6.23501	8.36331	12.4439
conserved in all	MAL13P1.191	conserved Plasmodium protein, unknown function		DNA binding (GO:0003677);zinc ion binding (GO:0008270)	DNA repair (GO:0006281)		0	61.43	62.56	57.5221	42.89	55.21
specific to pfal	PF10_0376	Plasmodium exported protein, unknown function		ATP binding (GO:0005524)		cytoplasm (GO:0005737);membrane (GO:0016020)	0	5.98	8.07692	10.6178	13.4367	12.73
conserved in all	MAL13P1.189	conserved Plasmodium membrane protein, unknown function				membrane (GO:0016020);integral to membrane (GO:0016021)	0	78.3	76.6038	47.36	55.09	75.28
conserved in all	PFL1810w	conserved Plasmodium protein, unknown function		zinc ion binding (GO:0008270);hydrolase activity (GO:0016787)			0	65.91	65.38	60.09	50.23	58.11
conserved in all	MAL13P1.194	conserved Plasmodium protein, unknown function				cytoplasm (GO:0005737);membrane (GO:0016020)	0	57.86	57.79	49.84	56.875	48.3923
conserved in all	PFL1825w	conserved Plasmodium membrane protein, unknown function				integral to membrane (GO:0016021)	0	74.7619	71.9048	61.9	62.86	61.9048
conserved in all	PF14_0368	thioredoxin peroxidase 1		thioredoxin peroxidase activity (GO:0008379);antioxidant activity (GO:0016209);oxidoreductase activity (GO:0016491);protein dimerization activity (GO:0046983)	response to oxidative stress (GO:0006979);DNA protection (GO:0042262);cell redox homeostasis (GO:0045454)		0	85.13	84.62	48.48	58.9744	83.08
specific to pfal	MAL13P1.197	probable protein, unknown function		ATP binding (GO:0005524)	transport (GO:0006810)	cytoplasm (GO:0005737)	0	2.1267	4.40529	12.1827	7.76699	1.46212
conserved in all	MAL13P1.195	CPW-WPC family protein					0	49.0501	53.6804	52.91	54.18	51.09
conserved in all	PF14_0369	copper transporter putative		copper ion transmembrane transporter activity (GO:0005375);intracellular copper ion transporter (GO:0005377)	copper ion transport (GO:0006825)	integral to membrane (GO:0016021);apicoplast (GO:0020011)	0	51.91	57.14	48.94	45.76	49.36
conserved in all	PFL1845c	calcyclin binding protein, putative				membrane (GO:0016020)	0	69.74	67.9825	65.79	53.5581	63.6
conserved in all	PF13_0215	conserved Plasmodium protein, unknown function				nucleus (GO:0005634)	0	64.0138	63.86	60	65.22	55.0725
conserved in all	PF11_0407	adrenodoxin reductase, putative		electron carrier activity (GO:0009055);NADPH-adrenodoxin reductase activity (GO:0015039)	electron transport (GO:0006118)	mitochondrion (GO:0005739)	0	52.02	54.42	53.4483	57.98	49.434
conserved in all	PFL1855w	cell cycle control protein, putative		binding (GO:0005488);protein binding (GO:0005515)	RNA metabolic process (GO:0016070);regulation of cell cycle (GO:0051726)		0	47.993	53.8389	48.75	47.98	48.82
specific to pfal	PF10_0393	rifin			antigenic variation (GO:0020033)	membrane (GO:0016020);host cell plasma membrane (GO:0020002)	0	4.3364	4.4335	8.92144	0	2.54622
conserved in all	PF11_0412	vacuolar ATP synthase subunit f, putative		hydrogen ion transporting ATP synthase activity, rotational mechanism (GO:0046933);proton-transporting ATPase activity, rotational mechanism (GO:0046961)	vacuolar acidification (GO:0007035);ATP synthesis coupled proton transport (GO:0015986)	mitochondrial proton-transporting ATP synthase complex (GO:0005753);proton-transporting V-type ATPase, V1 domain (GO:0033180)	0	92.25	91.4729	77.27	55.47	44.186
conserved in all	PF14_0373	ubiquinol-cytochrome c reductase iron-sulfur subunit, putative		ubiquinol-cytochrome-c reductase activity (GO:0008121);electron carrier activity (GO:0009055);oxidoreductase activity (GO:0016491);2 iron, 2 sulfur cluster binding (GO:0051537)	oxidation reduction (GO:0055114);electron transport (GO:0006118)	mitochondrion (GO:0005739);mitochondrial respiratory chain complex III (GO:0005750);membrane (GO:0016020)	0	86.8347	87.1148	85.4342	57.423	84.27
specific to pfal	PF10_0395	stevor				membrane (GO:0016020);Maurer's cleft (GO:0020036)	0	2.15706	10.728	13.4021	6.88525	9.18
conserved in all	PF11_0413	conserved Plasmodium protein, unknown function		protein binding (GO:0005515)			0	46.38	44.64	46.76	42.28	40.72
conserved in all	PF13_0218a	conserved Plasmodium protein, unknown function					0	81.36	84.75	81.03	81.03	81.03
specific to pfal	PF10_0396	rifin			antigenic variation (GO:0020033)	membrane (GO:0016020);host cell plasma membrane (GO:0020002)	0	4.93243	6.66667	4.96709	10.1664	4.51367
specific to pfal	PF10_0397	rifin			antigenic variation (GO:0020033)	membrane (GO:0016020);host cell plasma membrane (GO:0020002)	0	4.05132	13.0326	2.57271	10.9195	6.23656
conserved in all	PF14_0375	conserved Plasmodium protein, unknown function				membrane (GO:0016020)	0	78.3333	79.4444	81.1111	80	70.5556
conserved in all	PF14_0376	leucine carboxyl methyltransferase, putative		methyltransferase activity (GO:0008168)		membrane (GO:0016020)	0	65.07	65.69	52.29	65.66	67.78
specific to pfal	PF10_0398	rifin			antigenic variation (GO:0020033)	membrane (GO:0016020);host cell plasma membrane (GO:0020002)	0	2.38678	0	5.14064	11.25	4.87157
specific to pfal	PF10_0399	rifin			antigenic variation (GO:0020033)	membrane (GO:0016020);host cell plasma membrane (GO:0020002)	0	11.3208	12.3656	0	5.83	0
specific to pfal	PF10_0400	rifin			antigenic variation (GO:0020033)	membrane (GO:0016020);host cell plasma membrane (GO:0020002)	0	0	2.94635	10.6599	12.0968	9.91957
conserved in all	MAL13P1.205	Rab11b, GTPase, patched					0	82.46	81.86	61.06	76.5487	71.68
conserved in all	PF13_0223	conserved protein, unknown function				mitochondrion (GO:0005739)	0	70.7547	72.6415	44.34	68.87	68.87
conserved in all	PFL1895w	mitochondrial ribosomal protein L23 precursor, putative		structural constituent of ribosome (GO:0003735)	translation (GO:0006412)	intracellular (GO:0005622);mitochondrion (GO:0005739);ribosome (GO:0005840)	0	85.56	86.67	75.56	83.3333	53.45
specific to pfal	PF10_0402	rifin			antigenic variation (GO:0020033)	membrane (GO:0016020);host cell plasma membrane (GO:0020002)	0	4.89297	13.18	0	0	12.54
conserved in all	PF13_0224	60S ribosomal protein L18, putative		structural constituent of ribosome (GO:0003735)	translation (GO:0006412)	intracellular (GO:0005622);ribosome (GO:0005840);cytosolic large ribosomal subunit (GO:0022625)	0	91.85	90.7609	68.75	83.15	82.6087
specific to pfal	PF10_0405	rifin			antigenic variation (GO:0020033)	membrane (GO:0016020);host cell plasma membrane (GO:0020002)	0	0	9.16	3.94477	5.39084	5.40301
conserved in all	MAL13P1.209	60S ribosomal protein L18-2, putative		structural constituent of ribosome (GO:0003735)	translation (GO:0006412)	intracellular (GO:0005622);ribosome (GO:0005840);cytosolic large ribosomal subunit (GO:0022625)	0	89.3048	90.3743	43.32	86.0963	87.7
specific to pfal	PF10_0404	rifin			antigenic variation (GO:0020033)	membrane (GO:0016020);host cell plasma membrane (GO:0020002)	0	7.1953	5.9652	10.18	8.98	9.79667
specific to pfal	PF10_0406	erythrocyte membrane protein 1, PfEMP1		receptor activity (GO:0004872);host cell surface receptor binding (GO:0046789);cell adhesion molecule binding (GO:0050839)	pathogenesis (GO:0009405);cell-cell adhesion (GO:0016337);rosetting (GO:0020013);antigenic variation (GO:0020033);cytoadherence to microvasculature, mediated by parasite protein (GO:0020035)	integral to membrane (GO:0016021);host cell plasma membrane (GO:0020002);infected host cell surface knob (GO:0020030)	0	9.20693	9.25251	4.74	5.69736	6.15314
conserved in all	PF13_0227	vacuolar ATP synthase subunit d, putative		proton-transporting ATPase activity, rotational mechanism (GO:0046961)	hydrogen transport (GO:0006818);ATP synthesis coupled proton transport (GO:0015986)	vacuolar proton-transporting V-type ATPase, V0 domain (GO:0000220);proton-transporting two-sector ATPase complex, catalytic domain (GO:0033178)	0	90.73	90.3226	87.5502	71.6	84.4
conserved in all	PF13_0231	tetratricopeptide repeat family protein, putative					0	69.7417	72.56	71.8631	71.8631	50.4762
conserved in all	PFL1925w	cell division protein FtsH, putative		nucleotide binding (GO:0000166);ATP-dependent peptidase activity (GO:0004176);metalloendopeptidase activity (GO:0004222);ATP binding (GO:0005524);nucleoside-triphosphatase activity (GO:0017111)	proteolysis (GO:0006508);protein catabolic process (GO:0030163)	membrane (GO:0016020)	0	68.87	69.45	41.4966	53.6806	45.69
conserved in all	PF13_0232	casein kinase II beta chain		protein serine/threonine kinase activity (GO:0004674);protein kinase regulator activity (GO:0019887)		protein kinase CK2 complex (GO:0005956)	0	70.59	70.44	59.9483	56.9948	70.801
conserved in all	MAL13P1.213	transcription activator, putative		DNA binding (GO:0003677);transcription factor activity (GO:0003700);DNA-directed RNA polymerase activity (GO:0003899)	transcription (GO:0006350)		0	96.5517	94.83	98.28	96.5517	76.56
conserved in all	PF11_0429	conserved Plasmodium protein, unknown function		DNA binding (GO:0003677);protein binding (GO:0005515);zinc ion binding (GO:0008270)	transcription (GO:0006350);regulation of transcription, DNA-dependent (GO:0006355);chromatin modification (GO:0016568)	nucleus (GO:0005634)	0	73.1308	71.1	72.54	52.79	72.73
conserved in all	PF14_0391	60S ribosomal protein L1, putative		RNA binding (GO:0003723);structural constituent of ribosome (GO:0003735)	RNA processing (GO:0006396);translation (GO:0006412)	cytosolic large ribosomal subunit (GO:0022625)	0	98.6175	98.6175	97.24	96.77	97.7
conserved in all	PF14_0393	structure specific recognition protein, putative		DNA binding (GO:0003677);single-stranded DNA binding (GO:0003697)		nucleus (GO:0005634)	0	84.0237	81.854	43.68	71.15	58.3333
conserved in all	PF14_0394	conserved Plasmodium protein, unknown function		ATP binding (GO:0005524)		membrane (GO:0016020)	0	70.82	67.55	56.46	60.04	56.45
specific to primate	MAL13P1.214	phosphoethanolamine N-methyltransferase		phosphoethanolamine N-methyltransferase activity (GO:0000234);methyltransferase activity (GO:0008168)	phosphatidylcholine biosynthetic process (GO:0006656);metabolic process (GO:0008152)	Golgi apparatus (GO:0005794)	0	63.6704	61.4232	11.236	7.43155	8.37521
specific to pfal	PFL1950w	erythrocyte membrane protein 1, PfEMP1		receptor activity (GO:0004872);host cell surface receptor binding (GO:0046789);cell adhesion molecule binding (GO:0050839)	pathogenesis (GO:0009405);cell-cell adhesion (GO:0016337);rosetting (GO:0020013);antigenic variation (GO:0020033);cytoadherence to microvasculature, mediated by parasite protein (GO:0020035)	integral to membrane (GO:0016021);host cell plasma membrane (GO:0020002);infected host cell surface knob (GO:0020030)	0	9.37	8.08157	5.71	4.34454	4.34618
conserved in all	PF14_0396	conserved Plasmodium protein, unknown function		peptidase activity (GO:0008233);metallopeptidase activity (GO:0008237);metal ion binding (GO:0046872)		mitochondrion (GO:0005739);mitochondrial inner membrane (GO:0005743)	0	56.43	56.64	45.55	47.4576	54.64
specific to pfal	PFL1955w	erythrocyte membrane protein 1, PfEMP1		receptor activity (GO:0004872);host cell surface receptor binding (GO:0046789);cell adhesion molecule binding (GO:0050839)	pathogenesis (GO:0009405);cell-cell adhesion (GO:0016337);rosetting (GO:0020013);antigenic variation (GO:0020033);cytoadherence to microvasculature, mediated by parasite protein (GO:0020035)	integral to membrane (GO:0016021);host cell plasma membrane (GO:0020002);infected host cell surface knob (GO:0020030)	0	9.18233	9.09488	4.42	4.77	5.72803
conserved in all	PF11_0438	60S ribosomal protein L35ae, putative		structural constituent of ribosome (GO:0003735)	translation (GO:0006412)	intracellular (GO:0005622);ribosome (GO:0005840);large ribosomal subunit (GO:0015934)	0	79.02	82.07	76.5517	77.0833	77.78
conserved in all	PF11_0440	conserved Plasmodium protein, unknown function					0	62.08	61.62	56.57	65.7718	49.67
specific to pfal	PF11_0422	conserved Plasmodium protein, unknown function		nucleotide binding (GO:0000166)		cytoplasm (GO:0005737)	0	13.8568	14.3133	13.3828	5.53822	12.932
conserved in all	MAL13P1.217	conserved Plasmodium protein, unknown function				apicoplast (GO:0020011)	0	58.8424	59.8071	52.77	58.5443	59.1772
specific to pfal	PFL1960w	erythrocyte membrane protein 1, PfEMP1		receptor activity (GO:0004872);host cell surface receptor binding (GO:0046789);cell adhesion molecule binding (GO:0050839)	pathogenesis (GO:0009405);cell-cell adhesion (GO:0016337);rosetting (GO:0020013);antigenic variation (GO:0020033);cytoadherence to microvasculature, mediated by parasite protein (GO:0020035)	integral to membrane (GO:0016021);host cell plasma membrane (GO:0020002);infected host cell surface knob (GO:0020030)	0	11.14	7.37601	2.88	5.12712	7.33
conserved in all	PF11_0447	translation initiation factor eIF-1A, putative		RNA binding (GO:0003723);translation initiation factor activity (GO:0003743)	translational initiation (GO:0006413)	eukaryotic 43S preinitiation complex (GO:0016282)	0	98.0645	97.4194	92.41	89.8734	83.62
specific to pfal	PFL1970w	erythrocyte membrane protein 1, PfEMP1		receptor activity (GO:0004872);binding (GO:0005488)	pathogenesis (GO:0009405)	integral to membrane (GO:0016021)	0	10.0046	8.63408	3.75	5.80439	6.21572
conserved in all	PFL1975c	conserved Plasmodium protein, unknown function			cell cycle (GO:0007049);mitosis (GO:0007067);cell division (GO:0051301)	nucleus (GO:0005634)	0	79.2812	78.32	78.22	74.3802	70.6
conserved in all	PF11_0560	conserved protein, unknown function, patched					0	71.5447	72.36	78.86	79.67	79.67
conserved in all	PF11_0455a	conserved Plasmodium protein, unknown function		structural constituent of ribosome (GO:0003735)	translation (GO:0006412)	ribosome (GO:0005840)	0	100	100	53.85	100	71.79
conserved in all	PF11_0457	ubiquitin activating enzyme (E1) subunit Aos1, putative					0	63.23	64.35	53.2609	62.8169	56.4
conserved in all	PFL2000w	mitochondrial carrier protein, putative		binding (GO:0005488)	transport (GO:0006810)	mitochondrion (GO:0005739);mitochondrial inner membrane (GO:0005743);membrane (GO:0016020)	0	63.3205	67.1815	61.85	63.36	64.5
conserved in all	PF14_0411	small nuclear ribonucleoprotein, putative			RNA splicing (GO:0008380)	small nucleolar ribonucleoprotein complex (GO:0005732)	0	95.05	95.05	49.505	96.04	96.04
conserved in all	PF11_0461	Rab GTPase 6		GTPase activity (GO:0003924);protein binding (GO:0005515);GTP binding (GO:0005525)	intracellular protein transport (GO:0006886);intra-Golgi vesicle-mediated transport (GO:0006891);nucleocytoplasmic transport (GO:0006913);signal transduction (GO:0007165);small GTPase mediated signal transduction (GO:0007264);protein transport (GO:0015031);regulation of vesicle-mediated transport (GO:0060627)	intracellular (GO:0005622);Golgi apparatus (GO:0005794);membrane (GO:0016020)	0	95.6522	95.6522	95.17	95.17	94.69
conserved in all	PFL2005w	replication factor C subunit 4		nucleotide binding (GO:0000166);DNA binding (GO:0003677);DNA clamp loader activity (GO:0003689);ATP binding (GO:0005524);nucleoside-triphosphatase activity (GO:0017111)	DNA replication (GO:0006260)	DNA replication factor C complex (GO:0005663)	0	91.67	91.1504	90.48	89.5833	88.08
conserved in all	PFL2020c	conserved Plasmodium protein, unknown function		thiol oxidase activity (GO:0016972)	cell redox homeostasis (GO:0045454);oxidation reduction (GO:0055114)	membrane (GO:0016020);integral to membrane (GO:0016021)	0	47.04	47.6364	49.4403	48.51	49.91
conserved in all	PFL2030w	queuine tRNA-ribosyltransferase, putative		queuine tRNA-ribosyltransferase activity (GO:0008479)	tRNA modification (GO:0006400);queuosine biosynthetic process (GO:0008616)	mitochondrion (GO:0005739);apicoplast (GO:0020011)	0	49.46	50.76	56.12	55.44	56.2406
conserved in all	PFL2025w	conserved Plasmodium protein, unknown function					0	56.16	59.15	57.14	54.79	54.79
conserved in all	PF14_0415	dephospho-CoA kinase, putative		dephospho-CoA kinase activity (GO:0004140);ATP binding (GO:0005524)	coenzyme A biosynthetic process (GO:0015937)	membrane (GO:0016020);apicoplast (GO:0020011)	0	91.9708	91.9708	73.7226	86.2319	44.964
conserved in all	PF14_0416	zinc finger protein, putative		nucleic acid binding (GO:0003676);protein binding (GO:0005515);zinc ion binding (GO:0008270)			0	64.88	66.02	44.3627	58.68	58.94
conserved in all	MAL13P1.221	aspartate carbamoyltransferase		aspartate carbamoyltransferase activity (GO:0004070);amino acid binding (GO:0016597);carboxyl- or carbamoyltransferase activity (GO:0016743)	'de novo' pyrimidine base biosynthetic process (GO:0006207);cellular amino acid metabolic process (GO:0006520)	apicoplast (GO:0020011)	0	72.5333	72.8	70.13	54.4	68.5333
conserved in all	PF11_0464a	conserved Plasmodium protein, unknown function					0	81.1111	81.1111	73.33	75.56	75.56
conserved in all	PFL2055w	40S ribosomal protein S17, putative		structural constituent of ribosome (GO:0003735)	translation (GO:0006412)	intracellular (GO:0005622);mitochondrion (GO:0005739);ribosome (GO:0005840);cytosolic small ribosomal subunit (GO:0022627)	0	94.8905	94.8905	55.4745	94.1606	74.1
conserved in all	PF11_0465	dynamin-like protein		GTPase activity (GO:0003924);GTP binding (GO:0005525)	microtubule-based process (GO:0007017);vesicle-mediated transport (GO:0016192)	cytoplasm (GO:0005737);plasma membrane (GO:0005886);symbiont-containing vacuole membrane (GO:0020005);food vacuole (GO:0020020);host cell cytoplasm (GO:0030430);nuclear membrane (GO:0031965)	0	83.9904	83.7515	65.5582	49.82	59.17
conserved in all	PFL2060c	rab specific GDP dissociation inhibitor		Rab GDP-dissociation inhibitor activity (GO:0005093);Rab GTPase activator activity (GO:0005097)	protein transport (GO:0015031);vesicle-mediated transport (GO:0016192);regulation of GTPase activity (GO:0043087)		0	90.85	91.29	45.32	89.54	52.07
conserved in all	PFL2065c	mitochondrial import inner membrane translocase subunit, putative		P-P-bond-hydrolysis-driven protein transmembrane transporter activity (GO:0015450)	protein targeting to mitochondrion (GO:0006626);protein import into mitochondrial inner membrane (GO:0045039)	mitochondrial inner membrane (GO:0005743);mitochondrial intermembrane space protein transporter complex (GO:0042719)	0	81.0526	78.9474	65.26	80	82.11
conserved in all	PF13_0241a	conserved Plasmodium protein, unknown function					0	77.91	80.2326	69.41	67.44	67.44
conserved in all	PFL2080c	conserved Plasmodium protein, unknown function		ATP binding (GO:0005524);transferase activity (GO:0016740)		cytoplasm (GO:0005737)	0	51.9	49.37	44.3	44.3	45.5696
conserved in all	MAL13P1.227	ubiquitin conjugating enzyme		ubiquitin-protein ligase activity (GO:0004842);ATPase activity (GO:0016887);small conjugating protein ligase activity (GO:0019787)	regulation of cell cycle process (GO:0010564);protein sumoylation (GO:0016925);ER-associated protein catabolic process (GO:0030433);post-translational protein modification (GO:0043687);regulation of protein metabolic process (GO:0051246)	apicoplast (GO:0020011)	0	59.5	57.554	60.78	58.21	58.27
conserved in all	PF13_0242	isocitrate dehydrogenase (NADP), mitochondrial precursor		magnesium ion binding (GO:0000287);isocitrate dehydrogenase (NADP) activity (GO:0004450);NAD or NADH binding (GO:0051287)	isocitrate metabolic process (GO:0006102);oxidation reduction (GO:0055114)	mitochondrion (GO:0005739)	0	82.73	82.09	54.4872	66.951	55.65
conserved in all	PF11_0473	conserved Plasmodium protein, unknown function					0	43.37	43.37	44.58	46.11	46.99
conserved in all	MAL13P1.231	Sec61 alpha subunit, PfSec61		P-P-bond-hydrolysis-driven protein transmembrane transporter activity (GO:0015450)	protein transport (GO:0015031)	membrane (GO:0016020)	0	98.73	98.31	94.9153	87.04	70.17
conserved in all	MAL13P1.232	mog1 homolog, putative					0	64.29	63.6905	60.12	58.3333	59.5238
conserved in all	MAL13P1.233	DNA/RNA-binding protein Alba, putative		nucleic acid binding (GO:0003676)			0	74.53	74.06	73.9535	70.0935	76.53
conserved in all	PF14_0429	RNA helicase, putative		nucleic acid binding (GO:0003676);helicase activity (GO:0004386);ATP binding (GO:0005524);ATP-dependent helicase activity (GO:0008026)			0	46.98	49.5037	43.85	42.27	41.62
conserved in all	PF14_0431	protein serine/threonine kinase-1		protein kinase activity (GO:0004672);protein serine/threonine kinase activity (GO:0004674);protein serine/threonine/tyrosine kinase activity (GO:0004712);protein tyrosine kinase activity (GO:0004713);ATP binding (GO:0005524)	protein amino acid phosphorylation (GO:0006468);regulation of cell differentiation (GO:0045595)	nucleus (GO:0005634)	0	53.15	53.13	41.0515	40.07	46.1
conserved in all	PFL2150c	cytoplasmic translation machinery associated protein, putative					0	85.37	84.48	77.98	49.2537	76.42
conserved in all	PF14_0434	conserved Plasmodium protein, unknown function				Maurer's cleft (GO:0020036)	0	61.33	61.6022	58.89	60.1124	59.15
conserved in all	PF13_0251	DNA topoisomerase III, putative		nucleic acid binding (GO:0003676);DNA binding (GO:0003677);DNA topoisomerase activity (GO:0003916);DNA topoisomerase type I activity (GO:0003917);DNA topoisomerase (ATP-hydrolyzing) activity (GO:0003918)	DNA metabolic process (GO:0006259);DNA topological change (GO:0006265);DNA unwinding involved in replication (GO:0006268)	chromosome (GO:0005694)	0	68.31	69.86	59.9156	54.6392	44.17
conserved in all	PF11_0483a	conserved Plasmodium protein, unknown function		cytochrome-c oxidase activity (GO:0004129);protein farnesyltransferase activity (GO:0004660);copper ion binding (GO:0005507);zinc ion binding (GO:0008270);heme binding (GO:0020037)	protein amino acid farnesylation (GO:0018347);respiratory electron transport chain (GO:0022904)	protein farnesyltransferase complex (GO:0005965);integral to membrane (GO:0016021)	0	74.03	75.3247	64.94	75.32	77.9221
conserved in all	PFL2180w	mitochondrial ribosomal protein L3 precursor, putative		structural constituent of ribosome (GO:0003735)	translation (GO:0006412)	intracellular (GO:0005622);mitochondrial large ribosomal subunit (GO:0005762);ribosome (GO:0005840)	0	81.63	80.35	63.64	85.044	84.8
conserved in all	PF14_0439	M17 leucyl aminopeptidase		aminopeptidase activity (GO:0004177);metalloexopeptidase activity (GO:0008235);manganese ion binding (GO:0030145);leucyl aminopeptidase activity (GO:0004178)	proteolysis (GO:0006508);protein metabolic process (GO:0019538)	intracellular (GO:0005622);cytoplasm (GO:0005737);cytosol (GO:0005829)	0	65.88	67.42	59.59	43.5855	60.1
conserved in all	MAL13P1.237	conserved Plasmodium protein, unknown function					0	89.8123	89.01	65.51	88.24	69.71
conserved in all	PF11_0485	mitochondrial ATP synthase delta subunit, putative		hydrogen ion transporting ATP synthase activity, rotational mechanism (GO:0046933);proton-transporting ATPase activity, rotational mechanism (GO:0046961)	ATP synthesis coupled proton transport (GO:0015986);mitochondrial ATP synthesis coupled proton transport (GO:0042776)	mitochondrion (GO:0005739);proton-transporting ATP synthase complex, catalytic core F(1) (GO:0045261)	0	91.56	90.2597	46.1039	71.4286	77.99
conserved in all	PFL2195w	clathrin coat assembly protein AP180, putative					0	57.8704	58.29	43.39	53.23	53.69
conserved in all	PFL2200w	conserved Plasmodium protein, unknown function				cytoplasm (GO:0005737);membrane (GO:0016020)	0	56.2701	57.88	65.5949	50.1608	63.34
conserved in all	PFL2205w	conserved Plasmodium protein, unknown function				membrane (GO:0016020)	0	55.53	57.57	48.46	41.48	55.17
conserved in all	PFL2215w	actin I		structural constituent of cytoskeleton (GO:0005200);protein binding (GO:0005515)	cytoskeleton organization (GO:0007010)	actin filament (GO:0005884)	0	99.47	99.47	52.7559	98.6702	77.98
conserved in all	PF14_0443	centrin-2		calcium ion binding (GO:0005509)	mitosis (GO:0007067)	microtubule organizing center (GO:0005815)	0	97.0238	97.0238	82.7381	61.99	97.62
conserved in all	MAL13P1.241	GTPase, putative		GTPase activity (GO:0003924);GTP binding (GO:0005525)	small GTPase mediated signal transduction (GO:0007264);protein transport (GO:0015031)		0	78.125	78.5714	57.09	69.64	66.52
conserved in all	PF14_0448	40S ribosomal protein S2, putative		RNA binding (GO:0003723);structural constituent of ribosome (GO:0003735)	translation (GO:0006412)	intracellular (GO:0005622);ribosome (GO:0005840);small ribosomal subunit (GO:0015935);cytosolic small ribosomal subunit (GO:0022627)	0	94.49	94.49	45.22	94.49	90.81
conserved in all	PF14_0446	heme detoxification protein			heme catabolic process (GO:0042167)	food vacuole (GO:0020020);host cell cytoplasm (GO:0030430)	0	73.79	76.2136	76.0976	76.5854	74.29
conserved in all	PFL2225w	myosin A tail domain interacting protein					0	72.68	70.2439	68.12	69.12	69.12
conserved in all	PF14_0444	conserved Plasmodium protein, unknown function				membrane (GO:0016020)	0	71.43	70.59	61.06	61.45	66.39
conserved in all	PF14_0452	conserved Plasmodium protein, unknown function				cytoplasm (GO:0005737)	0	64.3836	65.7534	57.64	60.42	60.69
conserved in all	PF14_0451	mitochondrial ribosomal protein S14 precursor, putative		structural constituent of ribosome (GO:0003735)	translation (GO:0006412)	intracellular (GO:0005622);mitochondrial small ribosomal subunit (GO:0005763);ribosome (GO:0005840)	0	93.75	93.75	62.5	98.2143	95.54
conserved in all	PF14_0790	conserved Plasmodium protein, unknown function					0	60.47	61.66	64.03	63.24	63.64
conserved in all	PFL2245w	signal recognition particle receptor, beta subunit		GTPase activity (GO:0003924);signal recognition particle binding (GO:0005047);GTP binding (GO:0005525)	SRP-dependent cotranslational protein targeting to membrane (GO:0006614);small GTPase mediated signal transduction (GO:0007264)	intracellular (GO:0005622);signal recognition particle receptor complex (GO:0005785)	0	74.7126	74.71	71.65	43.68	71.26
conserved in all	PF14_0452a	conserved Plasmodium protein, unknown function					0	54.47	52.8926	50.41	50.41	52.07
conserved in all	MAL13P1.244	TBC domain protein, putative		Rab GTPase activator activity (GO:0005097)	regulation of Rab GTPase activity (GO:0032313)	intracellular (GO:0005622)	0	89.9425	87.3926	85.5908	82.42	87.36
conserved in all	PFL2275c	FK506-binding protein (FKBP)-type peptidyl-propyl isomerase		peptidyl-prolyl cis-trans isomerase activity (GO:0003755);FK506 binding (GO:0005528);protein dimerization activity (GO:0046983)	protein folding (GO:0006457);negative regulation of protein phosphatase type 2B activity (GO:0032513)		0	79.28	79.28	71.3816	73.9414	77.5244
specific to primate	PFL2255w	conserved Plasmodium protein, unknown function			ubiquitin cycle (GO:0006512)		0	69.4	69.0411	14.7541	12.6	13.74
conserved in all	MAL13P1.245	conserved Plasmodium protein, unknown function				cytoplasm (GO:0005737)	0	73.6842	74.6537	48.58	45.8924	68.13
conserved in all	MAL13P1.247	conserved Plasmodium protein, unknown function		nucleotide binding (GO:0000166)		nucleus (GO:0005634);cytoplasm (GO:0005737)	0	53.15	54.95	44.75	47.58	50.84
conserved in all	PFL2315c	conserved Plasmodium membrane protein, unknown function				integral to membrane (GO:0016021)	0	72.2628	71.5328	61.43	52.5547	62.86
specific to pfal	PF11_0506	antigen 332, DBL-like protein		receptor activity (GO:0004872);host cell surface receptor binding (GO:0046789)	pathogenesis (GO:0009405);cell-cell adhesion (GO:0016337)	integral to membrane (GO:0016021);Maurer's cleft (GO:0020036);host cell membrane (GO:0033644)	0	4.81	7.37	0.79	2.92	3.46299
conserved in all	PFL2305w	conserved Plasmodium protein, unknown function		methyltransferase activity (GO:0008168);tRNA (guanine-N7-)-methyltransferase activity (GO:0008176)	tRNA modification (GO:0006400)		0	53.43	54.42	58.5308	58.77	58.91
conserved in all	PFL2325c	conserved protein, unknown function				plasma membrane (GO:0005886);integral to membrane (GO:0016021)	0	77.63	78.97	64.0138	53.8462	65.8703
conserved in all	PF13_0260	conserved Plasmodium membrane protein, unknown function			transport (GO:0006810)	membrane (GO:0016020);integral to membrane (GO:0016021)	0	69.02	68.63	52.34	69.02	67.84
conserved in all	PF13_0261	nucleolar preribosomal associated cytoplasmic ATPase, putative		nucleotide binding (GO:0000166);ATP binding (GO:0005524)			0	72.34	71.66	58.5034	71.8821	71.7833
conserved in all	PFL2345c	tat-binding protein homolog		nucleotide binding (GO:0000166);transcription cofactor activity (GO:0003712);ATP binding (GO:0005524);hydrolase activity (GO:0016787);ATPase activity (GO:0016887);nucleoside-triphosphatase activity (GO:0017111)	ubiquitin-dependent protein catabolic process (GO:0006511);protein catabolic process (GO:0030163)	proteasome complex (GO:0000502);nucleus (GO:0005634);cytoplasm (GO:0005737)	0	89.89	90.3448	47.8161	51.0345	90.57
conserved in all	MAL13P1.253	small nuclear ribonucleoprotein, putative			RNA splicing, via transesterification reactions (GO:0000375);RNA processing (GO:0006396)	small nucleolar ribonucleoprotein complex (GO:0005732)	0	84.0426	82.8	88.3	87.1	88.3
specific to pfal	PF11_0515	rifin			antigenic variation (GO:0020033)	membrane (GO:0016020);host cell plasma membrane (GO:0020002)	0	4.11111	4.62107	7.3857	5.92593	6.92042
specific to pfal	PF11_0514	Plasmodium exported protein (PHISTa), unknown function		DNA binding (GO:0003677);nucleotidyltransferase activity (GO:0016779);hydrolase activity (GO:0016787)		cytoplasm (GO:0005737)	0	0.598802	0.645661	7.01107	3.18841	2.39521
specific to pfal	PF11_0517	rifin			antigenic variation (GO:0020033)	membrane (GO:0016020);host cell plasma membrane (GO:0020002)	0	8.67	2.54438	0	5.14905	9.48509
specific to pfal	PF11_0516	stevor				membrane (GO:0016020);Maurer's cleft (GO:0020036)	0	2.77778	8.43023	6.59218	9.35484	10.0649
conserved in all	PFL2370c	conserved Plasmodium protein, unknown function					0	48.9933	51.05	60.14	60.84	62.24
specific to pfal	PF11_0519	rifin			antigenic variation (GO:0020033)	membrane (GO:0016020);host cell plasma membrane (GO:0020002)	0	1.75847	8.25359	0	7.37463	0
specific to pfal	PF11_0520	rifin			antigenic variation (GO:0020033)	membrane (GO:0016020);host cell plasma membrane (GO:0020002)	0	8.20106	10.2639	10.0865	10.7558	3.42169
conserved in all	MAL13P1.257	conserved Plasmodium protein, unknown function					0	77.5641	78.85	71.7949	73.08	51.28
specific to pfal	PF14_0463	chloroquine resistance marker protein				nucleus (GO:0005634)	0	12.89	14.44	3.81	8.82353	8.6933
specific to pfal	PF11_0521	erythrocyte membrane protein 1, PfEMP1		transcription factor activity (GO:0003700);receptor activity (GO:0004872);binding (GO:0005488);zinc ion binding (GO:0008270);host cell surface receptor binding (GO:0046789);cell adhesion molecule binding (GO:0050839)	regulation of transcription, DNA-dependent (GO:0006355);pathogenesis (GO:0009405);cell-cell adhesion (GO:0016337);rosetting (GO:0020013);antigenic variation (GO:0020033);cytoadherence to microvasculature, mediated by parasite protein (GO:0020035)	nucleus (GO:0005634);integral to membrane (GO:0016021);host cell plasma membrane (GO:0020002);infected host cell surface knob (GO:0020030)	0	6.99	10.76	1.34572	3.55655	5.07
conserved in all	PF13_0268	60S ribosomal protein L17, putative		structural constituent of ribosome (GO:0003735)	translation (GO:0006412)	intracellular (GO:0005622);ribosome (GO:0005840);large ribosomal subunit (GO:0015934);cytosolic large ribosomal subunit (GO:0022625)	0	85.7143	85.2217	81.2808	81.2808	80.79
conserved in all	PF13_0269	glycerol kinase, putative		glycerol kinase activity (GO:0004370);ATP binding (GO:0005524)	carbohydrate metabolic process (GO:0005975);glycerol metabolic process (GO:0006071);glycerol-3-phosphate metabolic process (GO:0006072)		0	80.04	79.6407	59.8802	57.69	72.4551
conserved in all	PFL2415w	Hbeta58/Vps26 protein homolog, putative			vacuolar transport (GO:0007034);retrograde transport, endosome to Golgi (GO:0042147)	retromer complex (GO:0030904)	0	94.6128	89.78	91.25	49.4949	90.24
conserved in all	PF14_0476	serine/threonine protein kinase, putative		protein kinase activity (GO:0004672);protein serine/threonine kinase activity (GO:0004674);protein tyrosine kinase activity (GO:0004713);ATP binding (GO:0005524)	protein amino acid phosphorylation (GO:0006468)		0	94.43	94.1645	64.1	88.86	88.3
conserved in all	PF14_0481	conserved Plasmodium protein, unknown function		RNA binding (GO:0003723);protein methyltransferase activity (GO:0008276)	protein amino acid methylation (GO:0006479)	cytoplasm (GO:0005737)	0	57.6531	58.3333	55.8574	43.06	50.51
conserved in all	PF13_0272	thioredoxin-related protein, putative		protein disulfide isomerase activity (GO:0003756)	protein thiol-disulfide exchange (GO:0006467);cell redox homeostasis (GO:0045454)		0	70.8134	72.73	61.54	55.77	71.1538
conserved in all	PF14_0486	elongation factor 2		translation elongation factor activity (GO:0003746);GTPase activity (GO:0003924);GTP binding (GO:0005525)	translational elongation (GO:0006414)		0	97.6	97.36	43.9904	49.2253	79.88
conserved in all	PFL2465c	thymidylate kinase		thymidylate kinase activity (GO:0004798);ATP binding (GO:0005524)	dTDP biosynthetic process (GO:0006233);dTTP biosynthetic process (GO:0006235)		0	76.78	76.85	42.1801	67.89	65.14
conserved in all	PF14_0490	conserved Plasmodium protein, unknown function					0	61.54	60.65	62.1622	62.84	40.67
conserved in all	PF14_0488	conserved Plasmodium protein, unknown function		ubiquitin-protein ligase activity (GO:0004842);zinc ion binding (GO:0008270)	protein ubiquitination (GO:0016567);ubiquitin cycle (GO:0006512)	ubiquitin ligase complex (GO:0000151)	0	64.8221	65.76	48.05	68.26	61.57
conserved in all	PF14_0492	protein phosphatase 2b regulatory subunit, putative		calcium ion binding (GO:0005509);calcium-dependent protein serine/threonine phosphatase regulator activity (GO:0008597)	protein amino acid dephosphorylation (GO:0006470)	calcineurin complex (GO:0005955)	0	96.6102	96.05	63.28	93.79	93.22
conserved in all	PF13_0279	transcription initiation factor TFIIH, putative		transcription factor activity (GO:0003700);zinc ion binding (GO:0008270);general RNA polymerase II transcription factor activity (GO:0016251)	DNA repair (GO:0006281);transcription (GO:0006350);regulation of transcription, DNA-dependent (GO:0006355);response to DNA damage stimulus (GO:0006974)	core TFIIH complex (GO:0000439);nucleus (GO:0005634)	0	68.29	69.1131	72.81	72.51	72.21
conserved in all	PF13_0281	conserved Plasmodium protein, unknown function			transport (GO:0006810)	membrane (GO:0016020)	0	79.8817	79.8817	77.38	76.79	78.57
conserved in all	MAL13P1.271	V-type ATPase, putative		hydrogen ion transmembrane transporter activity (GO:0015078)	ATP synthesis coupled proton transport (GO:0015986)	vacuolar proton-transporting V-type ATPase complex (GO:0016471);proton-transporting V-type ATPase, V0 domain (GO:0033179)	0	94.48	93.3702	59.67	77.35	90.06
conserved in all	PF14_0502	U1 snRNA associated protein, putative					0	63.6905	61.61	61.61	44.05	61.31
conserved in all	PF13_0287	adenylosuccinate synthetase		magnesium ion binding (GO:0000287);adenylosuccinate synthase activity (GO:0004019);GTP binding (GO:0005525)	purine nucleotide biosynthetic process (GO:0006164);AMP biosynthetic process (GO:0006167)		0	78.0543	78.51	53.6199	66.22	63.4312
specific to pfal	PFL2535w	Plasmodium exported protein (PHISTb), unknown function				plasma membrane (GO:0005886)	0	12	13.4269	11.68	12	12.22
specific to pfal	PFL2565w	Plasmodium exported protein (PHISTa), unknown function		transferase activity (GO:0016740);metal ion binding (GO:0046872)		membrane (GO:0016020);apicoplast (GO:0020011)	0	5.93525	2.03535	12.3853	7.12531	8.77598
specific to pfal	PFL2585c	rifin			antigenic variation (GO:0020033)	membrane (GO:0016020);host cell plasma membrane (GO:0020002)	0	0	6.41667	8.53333	11.4667	1.5226
specific to pfal	PFL2605w	rifin			antigenic variation (GO:0020033)	membrane (GO:0016020);host cell plasma membrane (GO:0020002)	0	0	10.98	8.93	9.82659	9.53757
conserved in all	PF14_0510	cochaperone p23		chaperone binding (GO:0051087)			0	69.6552	69.6552	69.4545	69.93	71.01
specific to pfal	PFL2610w	stevor				membrane (GO:0016020);Maurer's cleft (GO:0020036)	0	0	3.5533	10.9333	10.3093	7.86838
specific to pfal	PFL2615w	rifin			antigenic variation (GO:0020033)	membrane (GO:0016020);host cell plasma membrane (GO:0020002)	0	0	8.45411	7.60499	7.36961	7.54491
specific to pfal	PFL2625w	rifin			antigenic variation (GO:0020033)	membrane (GO:0016020);host cell plasma membrane (GO:0020002)	0	2.23547	0	10.5812	0	12.3711
conserved in all	PF13_0296	splicing factor 3b subunit, putative					0	88.64	87.5	89.53	89.53	89.53
specific to pfal	PFL2630w	rifin			antigenic variation (GO:0020033)	membrane (GO:0016020);host cell plasma membrane (GO:0020002)	0	6.54843	6.52377	9.63303	8.16993	12.532
conserved in all	PF14_0514	tRNA intron endonuclease, putative		tRNA-intron endonuclease activity (GO:0000213)	tRNA splicing, via endonucleolytic cleavage and ligation (GO:0006388)	tRNA-intron endonuclease complex (GO:0000214)	0	56.44	54.46	56.701	42.11	50.46
specific to pfal	PFL2640c	rifin			antigenic variation (GO:0020033)	membrane (GO:0016020);host cell plasma membrane (GO:0020002)	0	0	10	11.2426	0	0
conserved in all	PF13_0300	mitochondrial inner membrane translocase, putative		protein transporter activity (GO:0008565)	protein targeting to mitochondrion (GO:0006626);protein transport (GO:0015031)	mitochondrial inner membrane (GO:0005743);mitochondrial inner membrane presequence translocase complex (GO:0005744)	0	88.6228	88.6228	89.8204	89.8204	91.02
specific to pfal	PFL2645c	rifin			antigenic variation (GO:0020033)	membrane (GO:0016020);host cell plasma membrane (GO:0020002)	0	4.13455	4.06272	10.4101	8.7963	0
specific to pfal	PFL2650w	Plasmodium exported protein, unknown function, fragment					0	2.90404	2.69504	6.27306	9.55882	1.19816
specific to pfal	PFL2655w	rifin			antigenic variation (GO:0020033)	membrane (GO:0016020);host cell plasma membrane (GO:0020002)	0	14.2	0.984426	11.3122	4.26579	11.5234
conserved in all	PF14_0518	nifU protein, putative		iron ion binding (GO:0005506);protein binding (GO:0005515);iron-sulfur cluster binding (GO:0051536)	cellular iron ion homeostasis (GO:0006879);iron-sulfur cluster assembly (GO:0016226)	mitochondrion (GO:0005739)	0	79.52	79.88	82.1	80.8642	81.48
specific to pfal	PFL2660w	rifin			antigenic variation (GO:0020033)	membrane (GO:0016020);host cell plasma membrane (GO:0020002)	0	2.30978	8.70617	7.71429	4.32931	5.31097
conserved in all	PF13_0303	regulator of chromosome condensation, putative					0	88.125	88.3333	78.75	77.92	83.75
conserved in all	MAL13P1.276	conserved Plasmodium protein, unknown function				Golgi membrane (GO:0000139);integral to membrane (GO:0016021)	0	61.03	57.87	51.7949	51.7949	52.31
conserved in all	PF14_0520	6-phosphogluconate dehydrogenase, decarboxylating, putative		catalytic activity (GO:0003824);phosphogluconate dehydrogenase (decarboxylating) activity (GO:0004616);binding (GO:0005488);oxidoreductase activity (GO:0016491);NADP or NADPH binding (GO:0050661)	pentose-phosphate shunt (GO:0006098);metabolic process (GO:0008152);oxidation reduction (GO:0055114)		0	80.9725	79.704	71.9149	82.2034	53.4722
conserved in all	PF14_0521	conserved Plasmodium protein, unknown function					0	42.61	46.37	48.26	49.4186	47.9
conserved in all	PF14_0524	protein phosphatase, putative		protein tyrosine/serine/threonine phosphatase activity (GO:0008138);phosphatase activity (GO:0016791)	protein amino acid dephosphorylation (GO:0006470);dephosphorylation (GO:0016311)		0	73.6	69.6629	60.47	60.69	65.7
specific to pfal	PFL2665c	erythrocyte membrane protein 1, PfEMP1		receptor activity (GO:0004872);host cell surface receptor binding (GO:0046789);cell adhesion molecule binding (GO:0050839)	pathogenesis (GO:0009405);cell-cell adhesion (GO:0016337);rosetting (GO:0020013);antigenic variation (GO:0020033);cytoadherence to microvasculature, mediated by parasite protein (GO:0020035)	integral to membrane (GO:0016021);host cell plasma membrane (GO:0020002);infected host cell surface knob (GO:0020030)	0	8.68607	9.83	4.14	6.35	5.37919
conserved in all	PF14_0523	protein phosphatase, putative		catalytic activity (GO:0003824);protein serine/threonine phosphatase activity (GO:0004722)	protein amino acid dephosphorylation (GO:0006470)		0	83.455	82.381	46.59	70.8	60.1
conserved in all	PF13_0305	elongation factor 1-alpha		translation elongation factor activity (GO:0003746);GTPase activity (GO:0003924);GTP binding (GO:0005525)	translational elongation (GO:0006414)	cytoplasm (GO:0005737);eukaryotic translation elongation factor 1 complex (GO:0005853)	0	98.42	98.65	77.88	92.0993	99.55
conserved in all	PF13_0304	elongation factor 1-alpha		translation elongation factor activity (GO:0003746);GTPase activity (GO:0003924);GTP binding (GO:0005525)	translational elongation (GO:0006414)	cytoplasm (GO:0005737)	0	98.42	98.65	77.88	92.0993	99.55
conserved in all	PF14_0526-a	conserved Plasmodium protein, unknown function		methyltransferase activity (GO:0008168)	metabolic process (GO:0008152)		0	77.78	77.29	74.63	80	78.54
conserved in all	PF13_0306	dynein light chain, putative		microtubule motor activity (GO:0003777)	microtubule-based process (GO:0007017)	microtubule associated complex (GO:0005875)	0	73.7705	75.41	82.6446	82.6446	80.9917
conserved in all	MAL13P1.279	protein kinase 5		protein kinase activity (GO:0004672);protein serine/threonine kinase activity (GO:0004674);cyclin-dependent protein kinase activity (GO:0004693);protein tyrosine kinase activity (GO:0004713);ATP binding (GO:0005524)	protein amino acid phosphorylation (GO:0006468);cell cycle (GO:0007049)		0	93.4028	92.3611	85.07	88.89	89.58
conserved in all	MAL13P1.281	glutamate--tRNA ligase, putative		nucleotide binding (GO:0000166);aminoacyl-tRNA ligase activity (GO:0004812);glutamate-tRNA ligase activity (GO:0004818);ATP binding (GO:0005524)	translation (GO:0006412);tRNA aminoacylation for protein translation (GO:0006418);glutamyl-tRNA aminoacylation (GO:0006424)	cytoplasm (GO:0005737);apicoplast (GO:0020011)	0	55.05	54.7496	54.61	47.65	57.2917
conserved in all	MAL13P1.282	conserved Plasmodium protein, unknown function		ATP binding (GO:0005524)		cytoplasm (GO:0005737)	0	80.6723	79.8319	57.9832	78.99	79.83
conserved in all	MAL13P1.283	TCP-1/cpn60 chaperonin family, putative		protein binding (GO:0005515);ATP binding (GO:0005524);ATPase activity, coupled (GO:0042623);unfolded protein binding (GO:0051082)	protein folding (GO:0006457);cellular protein metabolic process (GO:0044267)	chaperonin-containing T-complex (GO:0005832)	0	94.707	94.518	72.02	58.6	48.41
conserved in all	PF14_0529	gamma-adaptin, putative		binding (GO:0005488);protein binding (GO:0005515)	intracellular protein transport (GO:0006886);vesicle-mediated transport (GO:0016192)	trans-Golgi network (GO:0005802);membrane coat (GO:0030117);clathrin adaptor complex (GO:0030131);Golgi apparatus part (GO:0044431)	0	65.13	65.1226	56.37	42.36	62.47
conserved in all	PF13_0310	small subunit rRNA processing factor, putative			gene silencing (GO:0016458)	nucleus (GO:0005634);cytoplasm (GO:0005737)	0	56.05	59.56	50.2688	50.4636	46.81
conserved in all	PF14_0539	mitochondrial ribosomal protein L28 precursor, putative					0	87.19	87.19	64.1844	86.8327	87.54
specific to primate	MAL13P1.285	patatin-like phospholipase, putative			lipid metabolic process (GO:0006629);metabolic process (GO:0008152)		0	46.08	47.59	14.2857	12.5683	7.04365
conserved in all	PF14_0540	conserved Plasmodium protein, unknown function		binding (GO:0005488);protein binding (GO:0005515);protein transporter activity (GO:0008565)	protein import into nucleus (GO:0006606)	nucleus (GO:0005634);nuclear pore (GO:0005643);cytoplasm (GO:0005737)	0	82.28	82.8411	53.22	47.9532	64.19
conserved in all	PF14_0545	thioredoxin, putative		electron carrier activity (GO:0009055);protein disulfide oxidoreductase activity (GO:0015035);thiol-disulfide exchange intermediate activity (GO:0030508)	glycerol ether metabolic process (GO:0006662);response to oxidative stress (GO:0006979);cell redox homeostasis (GO:0045454)		0	90.3846	92.31	81.73	80.77	80.77
conserved in all	MAL13P1.294	GTP binding protein, putative		GTP binding (GO:0005525)	signal transduction (GO:0007165)	intracellular (GO:0005622)	0	95.37	95.1	41.1444	90.74	90.74
conserved in all	PF14_0555	conserved Plasmodium protein, unknown function					0	47.3214	46.43	50	41.53	50
conserved in all	PF14_0557	conserved Plasmodium protein, unknown function		catalytic activity (GO:0003824);branched-chain-amino-acid transaminase activity (GO:0004084)	metabolic process (GO:0008152);branched chain family amino acid biosynthetic process (GO:0009082)		0	63.47	63.16	60.8833	60.8833	61.2
conserved in all	PF13_0318	RNA binding protein, putative		nucleic acid binding (GO:0003676)			0	72.9282	71.82	58.89	71.67	71.11
conserved in all	MAL13P1.299	conserved protein, unknown function				integral to membrane (GO:0016021)	0	79.77	79.77	50.58	71.21	66.15
specific to primate	PF14_0556	conserved Plasmodium protein, unknown function		hydrolase activity (GO:0016787)			0	49.68	51.13	6.35	14.6963	13.79
conserved in all	MAL13P1.302	SUMO ligase, putative		nucleic acid binding (GO:0003676);protein binding (GO:0005515);zinc ion binding (GO:0008270);SUMO ligase activity (GO:0019789)			0	66.67	65.1	51.2909	58.41	43.99
conserved in all	PF14_0566	conserved protein, unknown function				mitochondrion (GO:0005739);apicoplast (GO:0020011)	0	74.0741	76.19	73.02	58.2915	72.16
conserved in all	PF14_0571	conserved Plasmodium membrane protein, unknown function				plasma membrane (GO:0005886);integral to membrane (GO:0016021)	0	83.3333	84.15	45.31	78.78	62.45
conserved in all	PF14_0575a	ribosomal protein L29, putative		structural constituent of ribosome (GO:0003735)	translation (GO:0006412)	intracellular (GO:0005622);ribosome (GO:0005840)	0	91.0448	89.5522	77.46	46.27	77.94
specific to primate	PF14_0565	conserved Plasmodium protein, unknown function					0	43.9916	43.78	9.20502	11.1	10.47
conserved in all	PF13_0326	actin-depolymerizing factor		actin binding (GO:0003779);actin monomer binding (GO:0003785);actin filament binding (GO:0051015)	actin polymerization or depolymerization (GO:0008154);actin cytoskeleton organization (GO:0030036);cytoplasmic actin-based contraction involved in cell motility (GO:0060327)	intracellular (GO:0005622);actin cytoskeleton (GO:0015629)	0	82.52	81.82	75.5245	75.5245	76.2238
conserved in all	PF14_0575	conserved Plasmodium protein, unknown function				membrane (GO:0016020)	0	60.91	60.2606	48.86	63.1922	65.4723
conserved in all	PF14_0574	conserved Plasmodium protein, unknown function		zinc ion binding (GO:0008270)	intracellular protein transport (GO:0006886)	endosome (GO:0005768);endosome membrane (GO:0010008)	0	77.3	76.92	46.9325	70.5521	41.5902
conserved in all	PF13_0327	cytochrome c oxidase subunit 2, putative		cytochrome-c oxidase activity (GO:0004129);copper ion binding (GO:0005507);heme binding (GO:0020037)	respiratory electron transport chain (GO:0022904)	membrane (GO:0016020);integral to membrane (GO:0016021)	0	72.37	72.37	68.56	72.4891	72.93
conserved in all	PF13_0328	proliferating cell nuclear antigen		DNA binding (GO:0003677);DNA polymerase processivity factor activity (GO:0030337)	regulation of DNA replication (GO:0006275)	PCNA complex (GO:0043626)	0	95.26	95.6204	92.7007	94.1606	94.53
conserved in all	PF14_0578	conserved Plasmodium protein, unknown function					0	80.1325	80.1325	75.3333	58.4416	74.67
specific to primate	MAL13P1.306-a	conserved Plasmodium protein, unknown function					0	66.1202	66.1202	4.45293	6.51709	4.62677
conserved in all	PF13_0331	conserved protein, unknown function				Golgi membrane (GO:0000139);endoplasmic reticulum (GO:0005783);endoplasmic reticulum membrane (GO:0005789);Golgi apparatus (GO:0005794);integral to membrane (GO:0016021)	0	78.0612	76.5306	75.65	73.06	73.06
conserved in all	PF14_0585	40S ribosomal protein S28e, putative		structural constituent of ribosome (GO:0003735)	translation (GO:0006412)	intracellular (GO:0005622);ribosome (GO:0005840);cytosolic small ribosomal subunit (GO:0022627)	0	97.0149	97.0149	98.51	98.51	98.51
conserved in all	PF13_0329	conserved Plasmodium protein, unknown function					0	82.9146	83.92	78.89	78.392	64.0909
conserved in all	PF14_0580	conserved Plasmodium protein, unknown function		DNA binding (GO:0003677)	transcription (GO:0006350);regulation of transcription, DNA-dependent (GO:0006355)	nucleus (GO:0005634)	0	46.93	47.97	51.67	42.92	40.82
conserved in all	PF13_0330	ATP-dependent DNA helicase, putative		nucleotide binding (GO:0000166);DNA helicase activity (GO:0003678);ATP-dependent DNA helicase activity (GO:0004003);ATP binding (GO:0005524);nucleoside-triphosphatase activity (GO:0017111)		nucleus (GO:0005634)	0	94.824	94.62	49.6894	59.4203	48.69
conserved in all	PF14_0586	conserved Plasmodium protein, unknown function					0	56.8807	55.7229	53.05	52.6316	53.05
conserved in all	PF14_0592	conserved Plasmodium protein, unknown function					0	84.9315	82.1918	91.7808	89.0411	89.0411
specific to pfal	PF14_0577	conserved Plasmodium protein, unknown function		nucleotide binding (GO:0000166)		cytoplasm (GO:0005737);membrane (GO:0016020);integral to membrane (GO:0016021)	0	13.35	14.0845	10.4167	12.0098	10.4103
conserved in all	PF14_0589	valine-tRNA ligase, putative		nucleotide binding (GO:0000166);aminoacyl-tRNA ligase activity (GO:0004812);valine-tRNA ligase activity (GO:0004832);ATP binding (GO:0005524)	translation (GO:0006412);tRNA aminoacylation for protein translation (GO:0006418);valyl-tRNA aminoacylation (GO:0006438)	cytoplasm (GO:0005737)	0	77.0642	76.422	42.5688	46.0274	50.5
conserved in all	PF14_0597	cytochrome c1 precursor, putative		iron ion binding (GO:0005506);electron carrier activity (GO:0009055);heme binding (GO:0020037)	electron transport (GO:0006118)	mitochondrion (GO:0005739);mitochondrial respiratory chain complex III (GO:0005750)	0	88.3249	88.58	76.1421	85.8586	90.8629
conserved in all	PF14_0598	glyceraldehyde-3-phosphate dehydrogenase		catalytic activity (GO:0003824);glyceraldehyde-3-phosphate dehydrogenase (phosphorylating) activity (GO:0004365);binding (GO:0005488);glyceraldehyde-3-phosphate dehydrogenase activity (GO:0008943);NAD or NADH binding (GO:0051287)	glucose metabolic process (GO:0006006);gluconeogenesis (GO:0006094);glycolysis (GO:0006096);metabolic process (GO:0008152)	mitochondrion (GO:0005739)	0	86.65	86.65	62.91	83.3828	53.98
conserved in all	PF14_0601	replication factor C3		nucleotide binding (GO:0000166);DNA binding (GO:0003677);DNA clamp loader activity (GO:0003689);ATP binding (GO:0005524);nucleoside-triphosphatase activity (GO:0017111)	DNA replication (GO:0006260);DNA strand elongation involved in DNA replication (GO:0006271)	DNA replication factor C complex (GO:0005663);PCNA complex (GO:0043626)	0	85.76	86.34	80.5233	64.83	58.3815
specific to pfal	PF14_0588	conserved Plasmodium protein, unknown function				membrane (GO:0016020)	0	8.01305	12.1465	6.28177	10.5626	12.0805
conserved in all	PF14_0606	mitochondrial ribosomal protein S6-2 precursor, putative		structural constituent of ribosome (GO:0003735)	translation (GO:0006412)	intracellular (GO:0005622);ribosome (GO:0005840)	0	85.8333	85.8333	82.5	85	84.17
conserved in all	PF13_0340	exosome complex exonuclease, putative		3'-5'-exoribonuclease activity (GO:0000175);RNA binding (GO:0003723)	RNA processing (GO:0006396)	exosome (RNase complex) (GO:0000178)	0	50.93	50.41	40.6312	45.7	44.68
conserved in all	PF13_0341	DNA-directed RNA polymerase 2, putative		DNA binding (GO:0003677);DNA-directed RNA polymerase activity (GO:0003899)	transcription (GO:0006350);transcription from RNA polymerase II promoter (GO:0006366)	nucleus (GO:0005634);DNA-directed RNA polymerase II, core complex (GO:0005665)	0	89.76	88.7805	56.59	89.27	88.78
conserved in all	MAL13P1.327	mitochondrial ribosomal protein S17 precursor, putative		structural constituent of ribosome (GO:0003735)	translation (GO:0006412)	organellar small ribosomal subunit (GO:0000314);intracellular (GO:0005622);ribosome (GO:0005840)	0	91.3043	90.4348	93.0435	91.3043	91.3
conserved in all	PF14_0612	conserved Plasmodium protein, unknown function		nucleic acid binding (GO:0003676);DNA binding (GO:0003677);zinc ion binding (GO:0008270)	transcription (GO:0006350);regulation of transcription, DNA-dependent (GO:0006355)	intracellular (GO:0005622);nucleus (GO:0005634);membrane (GO:0016020)	0	60.7407	73.08	75.96	73.08	72.22
conserved in all	MAL13P1.326	ferrochelatase		ferrochelatase activity (GO:0004325);ferrous iron binding (GO:0008198)	heme biosynthetic process (GO:0006783)	mitochondrion (GO:0005739)	0	65.53	62.68	62.86	47.16	58.29
conserved in all	PF13_0345	glycine cleavage T protein, putative		aminomethyltransferase activity (GO:0004047)	glycine catabolic process (GO:0006546)	cytoplasm (GO:0005737);mitochondrion (GO:0005739)	0	73.65	73.8916	69.61	47.67	71.15
conserved in all	MAL13P1.329	conserved Plasmodium membrane protein, unknown function				plasma membrane (GO:0005886);membrane (GO:0016020);integral to membrane (GO:0016021)	0	65.78	64.6919	56.2347	50.1217	57.6
conserved in all	PF14_0615	ATP synthase (C/AC39) subunit, putative		ATP binding (GO:0005524);hydrogen ion transmembrane transporter activity (GO:0015078);metal ion binding (GO:0046872);hydrogen ion transporting ATP synthase activity, rotational mechanism (GO:0046933);proton-transporting ATPase activity, rotational mechanism (GO:0046961)	vacuolar acidification (GO:0007035);ATP synthesis coupled proton transport (GO:0015986);plasma membrane ATP synthesis coupled proton transport (GO:0042777)	vacuolar proton-transporting V-type ATPase, V0 domain (GO:0000220);proton-transporting two-sector ATPase complex (GO:0016469)	0	94.2408	93.1937	47.1204	48.17	72.1649
conserved in all	PF13_0346	60S ribosomal protein L40/UBI, putative		structural constituent of ribosome (GO:0003735);protein tag (GO:0031386)	translation (GO:0006412);protein modification process (GO:0006464);ubiquitin-dependent protein catabolic process (GO:0006511)	intracellular (GO:0005622);ribosome (GO:0005840)	0	91.41	90.625	96.09	57.8125	100
conserved in all	MAL13P1.328	DNA topoisomerase VI, b subunit, putative		catalytic activity (GO:0003824);ATP binding (GO:0005524)			0	53.8732	54.3058	46.8198	50.7067	53.89
conserved in all	PF14_0617	conserved Plasmodium protein, unknown function		nucleotide binding (GO:0000166)		membrane (GO:0016020)	0	61.27	64.1844	60.57	65.14	64.66
conserved in all	PF14_0621	conserved Plasmodium protein, unknown function					0	73.63	70.33	76.92	76.92	61.54
conserved in all	PF13_0349	nucleoside diphosphate kinase		magnesium ion binding (GO:0000287);nucleoside diphosphate kinase activity (GO:0004550);ATP binding (GO:0005524);deoxyribonucleotide binding (GO:0032552);ribonucleotide binding (GO:0032553)	GTP biosynthetic process (GO:0006183);UTP biosynthetic process (GO:0006228);CTP biosynthetic process (GO:0006241)		0	83.8926	83.8926	81.21	85.2349	85.91
conserved in all	PF13_0350	signal recognition particle receptor alpha subunit		nucleotide binding (GO:0000166);signal recognition particle binding (GO:0005047);protein binding (GO:0005515);GTP binding (GO:0005525);nucleoside-triphosphatase activity (GO:0017111)	SRP-dependent cotranslational protein targeting to membrane (GO:0006614)	signal recognition particle receptor complex (GO:0005785)	0	70.66	69.62	54.42	62.84	63.7782
conserved in all	PF14_0624	conserved Plasmodium protein, unknown function				cytoplasm (GO:0005737)	0	61.15	59.9214	40.53	50.1	45.89
conserved in all	MAL13P1.337	Skp1 family protein, putative		protein binding (GO:0005515)	ubiquitin-dependent protein catabolic process (GO:0006511)		0	97.5309	97.5309	93.21	93.21	81.2155
conserved in all	PF14_0630	protein serine/threonine phosphatase		phosphoprotein phosphatase activity (GO:0004721);iron ion binding (GO:0005506);hydrolase activity (GO:0016787);manganese ion binding (GO:0030145)	protein amino acid dephosphorylation (GO:0006470)	protein serine/threonine phosphatase complex (GO:0008287)	0	84.81	86.07	41.8448	68.5039	51.2332
conserved in all	MAL13P1.342a	conserved Plasmodium protein, unknown function					0	62.99	60.63	66.14	56.69	57.48
conserved in all	MAL13P1.344	RNAse L inhibitor protein, putative		nucleotide binding (GO:0000166);ATP binding (GO:0005524);electron carrier activity (GO:0009055);ATPase activity (GO:0016887);nucleoside-triphosphatase activity (GO:0017111);iron-sulfur cluster binding (GO:0051536)			0	93.8611	94.0226	67.8514	61.7124	60.65
specific to pfal	MAL13P1.342	conserved Plasmodium protein, unknown function				membrane (GO:0016020);apicoplast (GO:0020011)	0	14.68	13.6012	14.18	11.4374	13.6012
conserved in all	PF13_0358	mitochondrial import inner membrane translocase, putative		P-P-bond-hydrolysis-driven protein transmembrane transporter activity (GO:0015450)	protein targeting to mitochondrion (GO:0006626);protein import into mitochondrial inner membrane (GO:0045039)	mitochondrial intermembrane space (GO:0005758);mitochondrial intermembrane space protein transporter complex (GO:0042719)	0	93.48	92.3913	77.1739	84.7826	86.96
specific to pfal	PF14_0631	conserved Plasmodium protein, unknown function		nucleotide binding (GO:0000166);calcium ion binding (GO:0005509);protein binding (GO:0005515)		extracellular region (GO:0005576)	0	11.295	12.9377	4.68	6.11	5.95
conserved in all	PF14_0643	conserved Plasmodium protein, unknown function		nucleic acid binding (GO:0003676)		intracellular (GO:0005622);nucleus (GO:0005634);cytoplasm (GO:0005737)	0	62.3	63.7584	64.5089	57.3304	63.5776
conserved in all	PF14_0645	conserved Plasmodium protein, unknown function				cytoplasm (GO:0005737)	0	54.7619	52.381	47.67	51.81	52.33
conserved in all	PF13_0362	U1 small nuclear ribonucleoprotein a, putative		protein binding (GO:0005515)			0	75.57	76.57	45.45	74.86	76
specific to pfal	PF14_0644	conserved Plasmodium protein, unknown function		extracellular matrix structural constituent (GO:0005201)	phosphate transport (GO:0006817)	extracellular region (GO:0005576);collagen (GO:0005581);cytoplasm (GO:0005737)	0	11.1371	11.4647	4.56	5.37	14.25
conserved in all	PF14_0653-a	derlin-1					0	85.05	85.05	44.39	70.97	80.84
specific to pfal	MAL13P1.490	stevor					0	2.00146	2.46599	7.05394	9.50413	4
specific to pfal	MAL13P1.495	rifin					0	2.99401	10.9489	11.76	13.19	13.55
specific to pfal	MAL13P1.500	rifin					0	0	0	6.71414	9.8081	2.12575
conserved in all	PF14_0655	helicase 45		RNA cap binding (GO:0000339);nucleic acid binding (GO:0003676);mRNA binding (GO:0003729);translation initiation factor activity (GO:0003743);helicase activity (GO:0004386);ATP binding (GO:0005524);ATP-dependent helicase activity (GO:0008026)	regulation of translational initiation (GO:0006446)	eukaryotic translation initiation factor 4F complex (GO:0016281)	0	98.995	98.7437	56.7839	97.7387	73.59
specific to pfal	MAL13P1.505	stevor					0	10.3333	3.34262	5.81006	13	5.55042
specific to pfal	MAL13P1.520	rifin					0	0	0	9.72477	0	4.73282
specific to pfal	MAL13P1.515	rifin					0	2.12897	2.49627	4.07627	13.1894	4.76
specific to pfal	MAL13P1.530	rifin					0	13.84	0	9.03955	0	12.7695
specific to pfal	MAL13P1.535	rifin					0	0	0	5.58943	5.76	2.03593
specific to pfal	MAL13P1.525	Plasmodium exported protein, unknown function, fragment					0	2.90404	2.69504	6.27306	9.55882	1.19816
specific to primate	PF14_0662	nucleoside transporter, putative		nucleoside transmembrane transporter activity (GO:0005337)		membrane (GO:0016020)	0	50.34	49.89	10.76	10.76	6.33188
conserved in all	PF14_0667a	conserved Plasmodium protein, unknown function			autophagic vacuole assembly (GO:0000045)	cytoplasm (GO:0005737)	0	68.75	69.6429	68.75	68.75	68.75
specific to pfal	MAL13P1.356	erythrocyte membrane protein 1, PfEMP1		receptor activity (GO:0004872)	pathogenesis (GO:0009405)	integral to membrane (GO:0016021)	0	9.40171	7.64388	3.28	6.75	7.83
conserved in all	PF14_0669	conserved Plasmodium protein, unknown function				nucleus (GO:0005634)	0	59.67	59.12	54.7	62.98	61.33
conserved in all	PF14_0671	conserved protein, unknown function				mitochondrion (GO:0005739);membrane (GO:0016020)	0	70.8029	72.06	70.23	66.92	59.54
conserved in all	PF14_0678	exported protein 2				symbiont-containing vacuole membrane (GO:0020005)	0	73.6111	72.2222	62.1528	61.32	41.115
conserved in all	PF14_0677	RNA 3'-terminal phosphate cyclase-like protein, putative		catalytic activity (GO:0003824)	ribosome biogenesis (GO:0042254)		0	57.82	58.5987	58.94	51.0504	44.47
conserved in all	PF14_0679	inorganic anion exchanger, inorganic anion antiporter		transporter activity (GO:0005215);secondary active sulfate transmembrane transporter activity (GO:0008271);inorganic anion transmembrane transporter activity (GO:0015103)	transport (GO:0006810);sulfate transport (GO:0008272)	integral to plasma membrane (GO:0005887);membrane (GO:0016020);integral to membrane (GO:0016021)	0	86.02	86.75	61.4706	74.963	65.92
conserved in all	PF14_0682	conserved Plasmodium membrane protein, unknown function				membrane (GO:0016020);integral to membrane (GO:0016021)	0	64.72	65.17	55.36	54.36	61.47
conserved in all	PF14_0672	phosphodiesterase delta, putative		3',5'-cyclic-nucleotide phosphodiesterase activity (GO:0004114);cAMP binding (GO:0030552)	signal transduction (GO:0007165);cyclic nucleotide metabolic process (GO:0009187)	membrane (GO:0016020)	0	67.48	66.7069	50.12	53.9249	50
conserved in all	PF14_0688	pre-mRNA-splicing factor ISY1 homolog, putative					0	66.9903	67.9612	71.6418	70.65	70.15
conserved in all	PF14_0697	dihydroorotase, putative		dihydroorotase activity (GO:0004151)	'de novo' pyrimidine base biosynthetic process (GO:0006207);pyrimidine base biosynthetic process (GO:0019856)		0	61.8785	62.1547	64.27	53.3333	63.99
conserved in all	PF14_0705	conserved Plasmodium protein, unknown function					0	78.0702	77.193	78.95	80.7018	80.7018
conserved in all	PF14_0709	mitochondrial ribosomal protein L20 precursor, putative		RNA binding (GO:0003723);structural constituent of ribosome (GO:0003735)	translation (GO:0006412)	organellar large ribosomal subunit (GO:0000315);intracellular (GO:0005622);mitochondrion (GO:0005739);ribosome (GO:0005840)	0	90.91	87.6033	56.2	86.78	86.78
conserved in all	PF14_0714	conserved Plasmodium membrane protein, unknown function				endoplasmic reticulum (GO:0005783);ER-Golgi intermediate compartment (GO:0005793);Golgi apparatus (GO:0005794);integral to membrane (GO:0016021)	0	76.9036	75.13	69.8	69.8	66.2437
conserved in all	PF14_0716	proteosome subunit alpha type 1, putative		endopeptidase activity (GO:0004175);threonine-type endopeptidase activity (GO:0004298)	ubiquitin-dependent protein catabolic process (GO:0006511);proteolysis involved in cellular protein catabolic process (GO:0051603)	proteasome core complex (GO:0005839)	0	72.12	72.4907	70.2	75.2	75.98
specific to pfal	PF14_0706	conserved Plasmodium protein, unknown function					0	7.74142	10	7.10295	8.7	12.85
conserved in all	PF14_0718	mediator complex subunit 31, putative		RNA polymerase II transcription mediator activity (GO:0016455)	regulation of transcription (GO:0045449)	mediator complex (GO:0016592)	0	63.64	63.64	68.1818	65.15	64.6617
specific to pfal	PF14_0708	probable protein, unknown function				cytoplasm (GO:0005737);membrane (GO:0016020)	0	11.976	10.9287	3.56	7.74715	4.9
conserved in all	PF14_0721	cytochrome c oxidase assembly protein, putative		copper ion binding (GO:0005507)	respiratory chain complex IV assembly (GO:0008535)	mitochondrion (GO:0005739);membrane (GO:0016020)	0	77.73	77.2926	66.23	75.4386	76.7544
conserved in all	PF14_0725	tubulin, putative		GTPase activity (GO:0003924);structural molecule activity (GO:0005198);GTP binding (GO:0005525)	microtubule-based process (GO:0007017);microtubule-based movement (GO:0007018);protein polymerization (GO:0051258)	microtubule (GO:0005874);protein complex (GO:0043234)	0	79.5019	80.35	73.13	49.904	56.35
specific to pfal	PF14_0728	conserved Plasmodium protein, unknown function				plasma membrane (GO:0005886);integral to membrane (GO:0016021)	0	0	2.18579	0	2.5572	14.85
specific to pfal	PF14_0732	Plasmodium exported protein (PHISTb), unknown function		nucleotide binding (GO:0000166)		intracellular (GO:0005622);cytoplasm (GO:0005737);membrane (GO:0016020)	0	12.11	12.06	12.59	14.83	13.46
specific to pfal	PF14_0736	Plasmodium exported protein, unknown function		ATP binding (GO:0005524);ATPase activity, coupled to transmembrane movement of ions, phosphorylative mechanism (GO:0015662)	ATP biosynthetic process (GO:0006754)	membrane (GO:0016020);apicoplast (GO:0020011)	0	8.37	11.41	12.4607	10.6846	13.57
specific to pfal	PF14_0740	Plasmodium exported protein (hyp17), unknown function		hydrolase activity (GO:0016787)		extracellular region (GO:0005576)	0	14.44	12.68	13.46	13.96	13.9
specific to pfal	PF14_0745	probable protein, unknown function				membrane (GO:0016020)	0	13.27	9.24	7.26073	12.2112	10.3571
specific to pfal	PF14_0746	Plasmodium exported protein (PHISTb), unknown function				membrane (GO:0016020)	0	13.2	12.7237	10	12.8	10.9639
specific to pfal	PF14_0744	Plasmodium exported protein, unknown function					0	11.62	11.43	13.7705	10.2784	8.35694
specific to pfal	PF14_0756	probable protein, unknown function				membrane (GO:0016020);apicoplast (GO:0020011)	0	3.05499	9.56679	12.87	11.3354	8.21
specific to pfal	PF14_0767	stevor				membrane (GO:0016020);Maurer's cleft (GO:0020036)	0	2.67934	4.15842	5.98291	10.9272	11.8812
specific to pfal	PF14_0747	surface -associated intersprsed gene 14.1 (SURFIN 14.1)				membrane (GO:0016020)	0	10.5954	9.36235	3.35	9.89	8.42
specific to pfal	PF14_0769	rifin			antigenic variation (GO:0020033)	membrane (GO:0016020);host cell plasma membrane (GO:0020002)	0	6.85083	2.34724	6.03645	6.32184	6.64622
specific to pfal	PF14_0770	rifin			antigenic variation (GO:0020033)	membrane (GO:0016020);host cell plasma membrane (GO:0020002)	0	13.5447	6.50624	7.85185	12.5641	8.65225
specific to pfal	PF14_0768	rifin			antigenic variation (GO:0020033)	membrane (GO:0016020);host cell plasma membrane (GO:0020002)	0	2.43902	1.40465	8.03571	9.48	10.5263
specific to pfal	PF14_0771	stevor				membrane (GO:0016020);Maurer's cleft (GO:0020036)	0	3.6604	8.56313	7.3743	9.8	10.53
specific to pfal	PF14_0772	rifin			antigenic variation (GO:0020033)	membrane (GO:0016020);host cell plasma membrane (GO:0020002)	0	2.14674	2.26556	4.61201	6.44028	8.36707
specific to pfal	PF14_0758	Plasmodium exported protein (hyp17), unknown function		motor activity (GO:0003774);actin binding (GO:0003779);calmodulin binding (GO:0005516);ATP binding (GO:0005524)		cytoplasm (GO:0005737);membrane (GO:0016020);myosin complex (GO:0016459)	0	9.96264	11.85	11.6904	13.86	13.38
specific to pviv	PVX_001610	variable surface protein Vir25-related					1.05805	0	5.18098	11.83	9.94152	13.5057
specific to pviv	PVX_106210	variable surface protein Vir6, putative					12.357	0	9.97732	10.3922	12.9032	4.99653
specific to pviv	PVX_096910	variable surface protein Vir23-related					12.82	0	14.45	11.9608	8.89328	7.76326
specific to pviv	PVX_121855	variable surface protein Vir18, putative					8.68	0	13.43	14.18	9.45	9.95
specific to pviv	PVX_083585	variale surface protein Vir18-related					13.43	0	14.1	3.10219	6.95946	13.27
specific to pviv	PVX_096920	variable surface protein Vir12-related					12.25	0	12.3482	10.7724	8.55397	11.7409
specific to pviv	PVX_106215	hypothetical protein					14.02	0	12.2	12.462	12.2754	12.36
specific to pviv	PVX_083580	variable surface protein Vir24-related					11.48	0	12.305	12.9288	7.97227	14.76
specific to pviv	PVX_088785	variable surfave protein Vir12, putative					13.3758	0	14.6402	5.99842	9.24	13.5135
specific to pviv	PVX_088790	variable surface protein Vir21-like					13.7	0	13.8158	8.56531	12.65	13.68
specific to pviv	PVX_083575	variable surface protein Vir24-related					5.48628	0	13.6187	6.20333	9.84556	12.3552
specific to pviv	PVX_001630	hypothetical protein					2.68795	0	13.7045	9.74026	4.79452	9.90338
specific to pviv	PVX_088795	hypothetical protein					13.37	0	13.09	8.67052	14.64	14.51
specific to pviv	PVX_001635	hypothetical protein, conserved					11.04	0	12.5193	4.57413	9.24303	12.46
specific to pviv/pkno	PVX_090835	hypothetical protein					2.23214	0	61.74	13.4969	2.0658	0
specific to pviv	PVX_094235	hypothetical protein					2.18522	0	3.36257	0	12.2807	0
specific to pviv/pkno	PVX_083565	hypothetical protein, conserved					14.97	0	61.9217	13.6986	8.63558	3.34044
specific to pviv/pkno	PVX_083560	hypothetical protein, conserved					8.97	0	67.62	10.2564	2.10934	13.8801
specific to pviv	PVX_002485	variable surface protein Vir12-related					2.41667	0	14.2857	7.27763	9.07534	11.1111
specific to pviv	PVX_001645	variable surface protein Vir12-related					10.59	0	12.5407	11.1321	8.98876	11.4019
specific to pviv	PVX_094245	variable surface protein Vir12-like					2.80402	0	12.9693	13.53	8.67347	6.85945
specific to pviv	PVX_121880	hypothetical protein					10.69	0	12.3989	9.88	12.973	12.5676
specific to pviv	PVX_001655	hypothetical protein					7.84314	0	7.04	11.7155	3.15664	13.6986
specific to pviv	PVX_096945	variable surface protein Vir4-related					3.29128	0	10.6942	11.7834	4.65773	11.6923
specific to pviv	PVX_001660	hypothetical protein					9.57	0	9.42761	8.24742	9.90566	3.75
specific to pviv/pkno	PVX_001670	hypothetical protein					11.5086	0	51.0101	11.99	10.0179	12.34
specific to pviv	PVX_094250	hypothetical protein					10.4	0	9.96678	11.7647	11.5942	11.8095
specific to pviv/pkno	PVX_096955	hypothetical protein					10.14	0	60.05	12.766	5.17121	8.15047
specific to pviv/pkno	PVX_001680	Phist protein (Pf-fam-b)					13.41	0	55.44	11.5	8.62801	14.17
specific to pviv/pkno	PVX_001685	Phist protein (Pf-fam-b)					10.3758	0	45.64	12.01	9.2	14.09
specific to pviv	PVX_121895	hypothetical protein					0.351679	0	14.2077	3.52113	2.44836	0.821256
specific to pviv/pkno	PVX_002520	Pv-fam-b protein					2.12095	0	52.05	13.8965	12.9973	11.5139
specific to pviv/pkno	PVX_001040	hypothetical protein, conserved		transcription factor activity (GO:0003700)			12.5845	0	54.43	9.42172	14.5161	10.49
specific to pviv	PVX_121905	hypothetical protein					4.00552	0	3.23034	10.0478	1.02469	9.77444
specific to pviv/pkno	PVX_121915	hypothetical protein					12.04	0	58.0247	12.3457	9.38272	13.46
specific to pviv/pkno	PVX_094280	hypothetical protein					14.98	0	55.33	11.6	8.52359	11.85
specific to pviv	PVX_096990	Pv-fam-d protein					14.46	0	13.54	12.62	12.29	13.94
specific to pviv/pkno	PVX_001752	hypothetical protein					14.4124	0	57.17	9.15493	6.95825	14.4213
specific to pviv/pkno	PVX_088875	hypothetical protein					13.15	0	54.99	3.74332	2.94	10.657
specific to pviv/pkno	PVX_121945	gap, putative					7.3724	0	80.74	12.5448	10.7769	11.747
specific to pviv/pkno	PVX_094305	tryptophan-rich antigen					14.5793	0	44.32	9.2	11.05	9.09
specific to pviv/pkno	PVX_097010	hypothetical protein					7.01299	0	67.62	6.2954	10	7.34824
specific to pviv/pkno	PVX_097015	hypothetical protein					9.09	0	45.56	6.71488	5.27	8.62916
specific to pviv/pkno	PVX_001783	hypothetical protein					10.05	0	56.76	7.36842	11.7647	12.79
specific to pviv/pkno	PVX_002630	hypothetical protein					13.6404	0	52.13	7.62	3.45	12.2124
specific to pviv/pkno	PVX_000975	hypothetical protein, conserved					14.1943	0	42.16	3.01	7.34119	8.86827
specific to pviv/pkno	PVX_001820	hypothetical protein					13.71	0	51.82	10.35	7.14	10.9329
specific to pviv/pkno	PVX_001830	hypothetical protein, conserved		nucleic acid binding (GO:0003676);zinc ion binding (GO:0008270)			14.3181	0	49.63	4.76	14.344	8.77
specific to pviv/pkno	PVX_098740	endonuclease/exonuclease/phosphatase domain containing protein					10.4493	0	64.38	6.38075	4.2364	12.19
absent in pfal	PVX_079915	hypothetical protein	confirmed				10.81	0	92.52	47.62	59.86	40.82
specific to pviv/pkno	PVX_089005	hypothetical protein					14.4879	0	53.93	14	10.0833	13.5
specific to pviv/pkno	PVX_000865	hypothetical protein, conserved					13.8298	0	55.97	9.68021	6.22	12.1
specific to pviv	PVX_084395	hypothetical protein					10.38	0	8.39786	7.58	3.15789	0
absent in pfal	PVX_115155	hypothetical protein	syntenic RNA gene in pfal (PF13TR006) at syntenic position				7.22	0	89.4444	10.5727	73.3333	73.89
specific to pviv/pkno	PVX_080005	hypothetical protein, conserved					7.27	0	65.91	10.43	3.86364	5.23
absent in pfal	PVX_087930	hypothetical protein	confirmed				0	0	78.38	45.05	43.24	44.1441
specific to pviv/pkno	PVX_002820	hypothetical protein					4.49108	0	52.41	4.79833	4.10292	5.14604
specific to pviv	PVX_081395	serine/threonine protein kinase, putative		protein kinase activity (GO:0004672);protein serine/threonine kinase activity (GO:0004674);protein tyrosine kinase activity (GO:0004713);ATP binding (GO:0005524)	protein amino acid phosphorylation (GO:0006468)		10.62	0	7.15796	5.5	6.86	6.7
specific to pviv/pkno	PVX_081485	hypothetical protein					12.1745	0	47.94	3.22	9.53339	5.18697
specific to pviv/pkno	PVX_083115	hypothetical protein, conserved					10.2	0	58.26	10.79	10.58	12.987
absent in pfal	PVX_094610	hypothetical protein	syntenic pseudogene (PF10_0080a) and RNA gene in pfal				20.8	0	79.9107	29.02	19.2	44.64
specific to pviv/pkno	PVX_000660	hypothetical protein					3.97276	0	58.91	7.6	4.66	13.95
specific to pviv	PVX_084530	hypothetical protein					6.4954	0	5.84101	3.92537	2.61755	5.96219
specific to pviv/pkno	PVX_094710	WD domain, G-beta repeat domain containing protein		microtubule motor activity (GO:0003777);ATP binding (GO:0005524)	microtubule-based movement (GO:0007018)		10.9652	0	71.9043	12.2107	7.59339	8.32
absent in pfal	PVX_084640	hypothetical protein	confirmed; synteny breakpoint in pfal				12.81	0	72.43	27.98	42.39	40.46
specific to pviv/pkno	PVX_111385	hypothetical protein					13.7681	0	50.45	8.95692	7.03	14.47
specific to pviv/pkno	PVX_111275	hypothetical protein					9.38547	0	64.69	9.98878	11.1111	8.26873
specific to pviv/pkno	PVX_093525	hypothetical protein					11.0113	0	53.46	4.07	4.41319	6.71173
absent in pfal	PVX_089485	hypothetical protein, conserved	not confirmed; syntenic pseudogene in pfal (MAL8P1.66); likely sequencing error in pfal and therefore not considered as absent in pfal				45.3642	0	82.4503	26.58	43.23	47.84
specific to pviv/pkno	PVX_080355	hypothetical protein		transcription factor activity (GO:0003700)			10.98	0	55.71	7.74	11.5412	13.44
specific to pviv/pkno	PVX_099290	hypothetical protein, conserved					14.24	0	60.2	4.33547	10.02	14.11
specific to pviv/pkno	PVX_091620	hypothetical protein		transcription factor activity (GO:0003700)		nucleus (GO:0005634)	12.357	0	49.71	5.75221	2.35988	7.82
specific to pviv/pkno	PVX_082810	hypothetical protein					14.78	0	58.78	12.06	9.43747	9.58392
specific to pviv/pkno	PVX_093635	hypothetical protein		transcription factor activity (GO:0003700)			14.9944	0	52.65	5.8	3.99	4.91106
specific to pviv/pkno	PVX_081825	hypothetical protein					14.6965	0	76.3	12.04	6.11588	5.38533
specific to pviv	PVX_081850	variable surface protein Vir22/23-related					11.64	0	14.1046	9.51557	9.7	12.2075
specific to pviv	PVX_082710	hypothetical protein					10.8247	0	3.73991	3.40633	4.73333	4.38125
specific to pviv/pkno	PVX_082660	hypothetical protein					1.96813	0	47.73	5.34979	4.73225	4.70219
specific to pviv/pkno	PVX_093685	hypothetical protein					13.44	0	57.57	10.8753	10.9756	7.38
specific to pviv/pkno	PVX_122680	hypothetical protein, conserved		transcription factor activity (GO:0003700)			12.2259	0	46.11	4.32411	10.3193	8.92092
specific to pviv	PVX_093700	hypothetical protein					11.52	0	13.0548	14.1593	13.6076	10.9467
specific to pviv	PVX_093705	variable surface protein Vir18, putative					11.0482	0	8.49	5.9499	14.4309	10.38
specific to pviv	PVX_093710	variable surface protein Vir24-related					12.09	0	13.62	11.8852	9.8081	13.7097
specific to pviv	PVX_099470	WD domain, G-beta repeat domain containing protein					10.8571	0	10.2975	9.6	8.92449	11.1338
specific to pviv	PVX_093715	variable surface protein Vir5-like					10.4208	0	8.77797	12.6	11.022	9.6
specific to pviv/pkno	PVX_003540	hypothetical protein, conserved					13.6961	0	40.6926	13.23	9.33	7.97
specific to pviv/pkno	PVX_003530	hypothetical protein					8.13	0	57.34	6.90377	4.20624	6.26632
specific to pviv	PVX_093725	variable surface protein Vir24-related					5.71185	0	4.77648	12.3772	8.90585	14.7208
specific to pviv	PVX_093730	hypothetical protein					0	0	8.867	12.8776	7.49809	3.86643
specific to pviv	PVX_003525	hypothetical protein					13.74	0	5.29979	10.2524	7.93	8.40921
specific to pviv	PVX_003505	variable surface protein Vir24-related					11.11	0	11.1905	10.3865	11.0312	13.22
specific to pviv	PVX_003500	hypothetical protein, conserved					3.02521	0	9.95763	8.78378	11.5385	14.2202
specific to pviv	PVX_003495	variable surface protein Vir22/24-related					11.18	0	10.7087	11.3386	12.4014	11.02
specific to pviv	PVX_003490	hypothetical protein, conserved					13.3117	0	13.7658	9.47712	10.78	10.9299
specific to pviv/pkno	PVX_096020	hypothetical protein					12.0902	0	58.7209	11.7994	6.19469	10.91
specific to pviv/pkno	PVX_003475	hypothetical protein, conserved					6.45304	0	63.83	6.89	8.85609	9.06
specific to pviv/pkno	PVX_099580	hypothetical protein, conserved					14.4246	0	56.32	6.9	10.97	13.89
specific to pviv/pkno	PVX_091860	hypothetical protein					12.22	0	46.68	6.18	7.5	14.55
specific to pviv	PVX_103150	variable surface protein Vir18, putative					7.65172	0	4.31762	2.45902	9.83607	11.6803
specific to pviv	PVX_103155	variable surface protein Vir12-related					4.3	0	14.6396	8.64745	7.90068	9.27602
specific to pviv/pkno	PVX_099635	hypothetical protein					14.375	0	53.51	8.92	8.16901	14.0845
specific to pviv/pkno	PVX_103160	variable surface protein Vir10-like					13.78	0	50.76	5.43294	6.21963	12.6437
specific to pviv/pkno	PVX_098065	hypothetical protein, conserved					14.8177	0	48.23	5.55	9.38	10.58
specific to pviv/pkno	PVX_000005	hypothetical protein					12.76	0	67.38	6.07102	12.1294	9.51
specific to pviv	PVX_110825	Pv-fam-d protein		transcription regulator activity (GO:0030528)	regulation of transcription (GO:0045449)	nucleus (GO:0005634)	13.3473	0	9.39	6.38	8.6	10.8593
specific to pviv	PVX_000015	Pv-fam-d protein					8.43	0	14.9031	14.12	14.22	13.73
specific to pviv/pkno	PVX_004539	variable surface protein Vir12-related					14.17	0	62.25	13.2246	10.1786	11.21
specific to pviv	PVX_105200	Pv-fam-c protein					14.12	0	13.4276	12.9577	6.95901	2.33766
specific to pviv	PVX_085245	hypothetical protein, conserved		nucleic acid binding (GO:0003676);zinc ion binding (GO:0008270)			11.5665	0	10.4639	8.33977	4.25	10.3635
absent in pfal	PVX_097890	histone deacetylase, putative	syntenic pseudogene in pfal (PFE0328w)				10.57	0	86.45	36.24	45.92	37.41
specific to pviv/pkno	PVX_085305	hypothetical protein					11.8445	0	48.65	10.3139	6.4574	11.68
specific to pviv/pkno	PVX_116590	hypothetical protein, conserved					14.6023	0	48.24	13.39	13.78	10.5686
specific to pviv/pkno	PVX_116605a	hypothetical protein, conserved					13.2753	0	49.47	9.39	4.44	9.39824
specific to pviv/pkno	PVX_114260	hypothetical protein, conserved					12.1579	0	46.57	6.37	7.74	11.7871
specific to pviv/pkno	PVX_099975	hypothetical protein					12.6001	0	67.54	4.84	9.02	4.4181
absent in pfal	PVX_090125	hypothetical protein	maps to internal var gene cluster in pfal on chr 4				13.57	0	67.01	34.09	11.39	44.49
specific to pviv/pkno	PVX_097795	hypothetical protein		endopeptidase inhibitor activity (GO:0004866);zinc ion binding (GO:0008270)			12.33	0	60.94	5.65798	7.03	9.83397
specific to pviv/pkno	PVX_092185	hypothetical protein, conserved					13.7283	0	55.8	5.51	6.68348	6.40704
specific to pviv	PVX_100010	hypothetical protein					0	0	0	1.34615	0	1.54739
specific to pviv/pkno	PVX_090150	erythrocyte membrane-associated antigen, putative					14.4734	0	49.65	7.93	7.83388	10.61
specific to pviv/pkno	PVX_087140	hypothetical protein					14.5336	0	49.79	11.165	11.3	13.7
specific to pviv/pkno	PVX_092340	hypothetical protein, conserved		nucleic acid binding (GO:0003676);zinc ion binding (GO:0008270)			14.3704	0	53.5	6.07	4.18776	8.97
absent in pfal	PVX_116795	hypothetical protein	syntenic ortholog in pfal (PF14_0706); decreased global sequence similarity due to large low-complexity insert				13.52	0	85.82	19.19	47.05	12.96
specific to pviv	PVX_090285	Pvstp1, putative					13.99	0	14.9628	10.4024	6.48	7.95
specific to pviv	PVX_090310	hypothetical protein, conserved					12.395	0	10.6667	11.804	11.5163	9.35412
specific to pviv	PVX_090315	variable surface protein Vir12-like					10.47	0	14.9897	12.94	8.99796	11.0429
specific to pviv	PVX_097565	hypothetical protein					12.92	0	13.9908	10.984	7.67327	2.50072
specific to pviv/pkno	PVX_300088						14.2112	0	57.59	7.94271	5.35948	11.5385
specific to pviv	PVX_097555	variable surface protein Vir12/16-related					11.24	0	12.8846	9.10853	10.1338	11.8421
specific to pviv/pkno	PVX_086925	hypothetical protein					7.96	0	49.0946	10.79	9.34959	8.78
specific to pviv	PVX_097550	hypothetical protein					2.20421	0	6.67362	9.7561	12.2845	12.3732
specific to pviv	PVX_097545	variable surface protein Vir12-related					12.1951	0	11.7978	14.5907	10.1996	13.4956
specific to pviv	PVX_097542	hypothetical protein					14.26	0	12.9296	10.7143	7.67857	13.3452
specific to pviv	PVX_097540	variable surface protein Vir24-related					13.32	0	12.7907	12.3696	10.78	9.43
specific to pviv	PVX_086895	hypothetical protein, conserved					10.85	0	11.9643	8.30325	11.3718	9.76492
specific to pviv	PVX_097530	variable surface protein Vir22/12-related					13.1429	0	12.8544	11.2782	12.19	12.98
specific to pviv	PVX_086890	variable surface protein Vir8-like					8.981	0	11.2648	10.3529	12.3596	12.6582
specific to pviv	PVX_092475	hypothetical protein					7.00829	0	9.40832	6.2369	3.45912	7.33753
specific to pviv	PVX_086865	hypothetical protein					9.9	0	12.2029	8.26033	9.20139	10.42
specific to pviv	PVX_086855	variable surface protein Vir24-like					4.82592	0	11.63	10.1142	10.5263	10
specific to pviv	PVX_005040	hypothetical protein					10.69	0	8.48881	13.981	6.89	9.02896
specific to pviv	PVX_005045	variable surface protein Vir12-related					11.91	0	11.1111	11.6402	13.5371	11.804
specific to pviv	PVX_005055	hypothetical protein					6.89441	0	14.5251	7.1161	12.6786	10.82
specific to pviv	PVX_005047	variable surface protein Vir22/23-related					14	0	10.9453	9.84848	11.4662	11.1111
specific to pviv/pkno	PVX_113731	hypothetical protein		transferase activity (GO:0016740)			12.0086	0	53.84	3.93	3.09036	4.37
specific to pviv/pkno	PVX_117155	hypothetical protein		DNA binding (GO:0003677)			14.21	0	59.74	7.19	5.49	5.22321
specific to pviv/pkno	PVX_092655	hypothetical protein					13.8568	0	58.34	9.82542	7.15156	9.72778
specific to pviv/pkno	PVX_092645	hypothetical protein					11.2669	0	65.56	2.1978	9.03592	9.26
specific to pviv	PVX_119215	PV1H14010_P, putative					3.11111	0	11.0454	12.8	8	9.78593
specific to pviv	PVX_119210	variant surface protein Vir22/5/24, putative					8.89	0	12.2186	14.8276	11.11	13.1481
specific to pviv/pkno	PVX_085970	hypothetical protein					10.48	0	40.43	7.84314	13.3229	9.09
specific to pviv/pkno	PVX_300114						10.3236	0	58.9394	5.38876	9.18	11.3914
specific to pviv/pkno	PVX_092760	hypothetical protein, conserved		transcription factor activity (GO:0003700)			11.366	0	55.43	6.05428	9.9531	7.56785
specific to pviv/pkno	PVX_123750	hypothetical protein		transcription factor activity (GO:0003700);binding (GO:0005488)			12.8276	0	58.49	4.8628	7.12	8.46341
specific to pviv/pkno	PVX_086030	hypothetical protein					2.74949	0	61.78	5.36797	13.3803	2.21479
specific to pviv/pkno	PVX_117365	hypothetical protein					8.82905	0	52.97	4.76	6.45	11.06
specific to pviv	PVX_086135	hypothetical protein					11.1193	0	9.94083	8.42188	4.18146	8.59961
specific to pviv/pkno	PVX_117430	hypothetical protein					13.0639	0	50.84	11.18	12.68	14.83
specific to pviv/pkno	PVX_113250	hypothetical protein					1.2222	0	52.68	7.38636	4.54545	9.89011
specific to pviv/pkno	PVX_113240	hypothetical protein					14.29	0	62.64	12.69	11.94	13.43
specific to pviv	PVX_113220	hypothetical protein, conserved					3.02587	0	4.74453	6.23116	3.87183	9.93151
specific to pviv	PVX_124725	hypothetical protein					4.84027	0	3.91621	4.12955	9.24214	5.59647
specific to pviv	PVX_124720	variable surface protein Vir12-related					4.68414	0	11.3761	10.8059	11.7541	10.28
specific to pviv	PVX_124712	variable surface protein Vir24-related					8.5	0	2.83922	7.25	7.82998	5.28801
specific to pviv	PVX_124705	variable surface protein Vir12-related		RNA binding (GO:0003723);ribonuclease T2 activity (GO:0033897)			10.02	0	13.8047	12.03	6.71521	9.31264
specific to pviv/pkno	PVX_117725	hypothetical protein					8.56777	0	89.3	5.43294	8.55457	5.31401
specific to pviv/pkno	PVX_124115	hypothetical protein, conserved					14.39	0	44.05	11.94	12.61	11.92
specific to pviv/pkno	PVX_100620	hypothetical protein					13.53	0	43.24	6.33833	6.85	10.71
specific to pviv/pkno	PVX_118062	chloroquine resistance marker protein, putative					12.207	0	43.52	4.11	6.41	9.36754
specific to pviv/pkno	PVX_101070	hypothetical protein, conserved					14.97	0	56.72	4.19299	8.8208	12.3288
specific to pviv/pkno	PVX_101205	hypothetical protein					5.96907	0	62.06	10.6531	10.1834	9.05636
specific to pviv/pkno	PVX_118682	erythrocyte membrane protein 3, putative					13.15	0	43.97	10.8736	14.8	7.15667
specific to pviv	PVX_101625	variable surface protein Vir18-like					4.64481	0	5.91614	8.15939	7.40038	10.4167
specific to pviv	PVX_101505	Pv-fam-d protein					14.72	0	13.5881	12.326	12.8878	2.38965
specific to pviv	PVX_101620	variable surface protein Vir16-related					12.29	0	11.11	13	14.96	13.97
specific to pviv	PVX_101500	hypothetical protein					3.73	0	2.54267	5.68	4.14634	3.59
specific to pkno	PKH_080010	SICAvar antigen (fragment)					13.3	12.6298	0	10.4991	10.8997	11.6013
specific to pkno	PKH_050010	SICAvar antigen (fragment)					11.75	14.69	0	12.1827	6.47359	4.93562
specific to pkno	PKH_060005	hypothetical protein, conserved in P.knowlesi (fragment)					0	0	0	0	0	0
specific to pkno	PKH_020010	SICAvar antigen (fragment)					11.9171	4.2042	0	7.60761	8.20821	6.74847
specific to pkno	PKH_110010	SICAvar-like antigen					5.77	9.57	0	10.84	5.07	5.54
specific to pkno	PKH_050020	SICAvar antigen					9.93217	4.43686	0	5.06257	4.83504	8.78351
specific to pkno	PKH_100020	KIR-like protein					9.23	14.8218	0	9.79284	7.87992	8.22199
specific to pkno	PKH_010040	hypothetical protein					14.52	13.69	0	13.28	9.13	14.52
specific to pkno	PKH_020020	SICAvar-like antigen					6.05173	10.72	0	9.60512	10.5759	8.96
specific to pkno	PKH_030010	SICAvar antigen (fragment)					5.24412	6.66667	0	11.5942	14.2349	6.34921
specific to pkno	PKH_050021	SICAvar-like antigen					6.29575	10.95	0	12.4	4.44	11.6371
specific to pkno	PKH_080060	SICAvar antigen (fragment)					4.01979	8.73016	0	7.24409	6.30817	9.00901
specific to pkno	PKH_030140	SICAvar antigen (fragment)					8.46	14.9606	0	8.07	11.61	11.22
specific to pkno	PKH_020230	KIR protein					6.63594	12.8617	0	2.89389	8.37359	10.467
specific to pkno	PKH_100210	SICAvar antigen (fragment)					11.4024	3.07901	0	4.40367	4.47304	9.78593
specific to pkno	PKH_030180	SICAvar antigen (fragment)					9.75	12.5887	0	11.3475	12.77	10
specific to pkno	PKH_050180	KIR protein					3.28665	14.4158	0	9.62302	7.54148	2.52019
specific to pkno	PKH_020260	SICAvar antigen (fragment)					11.7	12.1911	0	8.95091	9.89632	5.5794
specific to pkno	PKH_100220	SICAvar antigen (fragment)					5.28411	3.84433	0	10.3753	11.5639	4.5354
specific to pkno	PKH_020270	SICAvar antigen (fragment)					0	10.4137	0	9.18367	10.0575	3.72218
specific to pkno	PKH_120300	SICAvar antigen (fragment)					11.0255	4.16	0	5.26316	9.21382	8.62155
specific to pkno	PKH_100230	SICAvar antigen (fragment)					11.8106	5.9	0	12.5676	7.83133	10.72
specific to pkno	PKH_010280	SICAvar antigen (fragment)					12.29	9.33661	0	10.3194	10.9181	12.41
specific to pkno	PKH_110360	SICAvar antigen					11.8726	5.01	0	5.41498	6.07287	6.47446
specific to pkno	PKH_060490	KIR protein					11.15	12.5997	0	7.02	10.5096	8.42434
specific to pkno	PKH_130515	SICAvar antigen (fragment)					8.65248	2.6712	0	10.0313	8.98662	2.88509
specific to pkno	PKH_080430	KIR protein					3.11077	10.7717	0	12.2667	8.84244	10.24
specific to pkno	PKH_130530	SICAvar antigen					11.5178	5.44	0	9.98818	7.44241	4.2503
specific to pkno	PKH_040605	hypothetical protein, conserved in P.knowlesi					5.23691	7.3913	0	7.42857	5.22134	4.54976
specific to pkno	PKH_020570	SICAvar antigen					11.4563	3.59551	0	2.41167	10.0505	9.97955
specific to pkno	PKH_040610	SICAvar antigen (fragment)					10.4545	4.32852	0	12.7358	7.49601	9.17917
specific to pkno	PKH_140530	SICAvar antigen					11.3714	6.68	0	1.92926	6.17363	4.57
specific to pkno	PKH_040620	SICAvar antigen (fragment)					4.50161	4.48343	0	9.28144	11.215	4.97001
specific to pkno	PKH_040630	SICAvar antigen (fragment)					10.6383	1.3302	0	3.54331	10.6383	5.16717
specific to pkno	PKH_030540	SICAvar antigen					11.4355	4.35502	0	9.68575	3.41786	11.578
specific to pkno	PKH_050500	SICAvar antigen (fragment)					8.01317	7.34024	0	11.0454	11.7647	13.189
specific to pkno	PKH_050510	KIR protein					8.7344	14.4128	0	4.45633	11.3274	10.7203
specific to pkno	PKH_100540	SICAvar antigen (fragment)					10.1852	6.44	0	9.86704	6.64801	6.92792
specific to pkno	PKH_070530	KIR protein					2.95876	19.4379	0	12.114	11.6814	11.3586
specific to pkno	PKH_090710	SICAvar antigen (fragment)					11.68	11.8353	0	8.48708	10.7446	4.26429
specific to pkno	PKH_040710	SICAvar antigen					11.2	6.43	0	2.1601	8.91152	9.29344
specific to pkno	PKH_090720	SICAvar antigen (fragment)					11.5504	7.42794	0	10.6548	11.1874	11.0405
specific to pkno	PKH_120720	SICAvar antigen (fragment)					6.59945	4.85156	0	6.59945	7.79102	11.549
specific to pkno	PKH_060705	hypothetical protein, conserved in P.knowlesi (fragment)					2.22593	10.3448	0	4.19162	5.97015	5.80297
specific to pkno	PKH_040720	SICAvar-like antigen (fragment)					3.59375	4.69799	0	9.44882	5.28684	6.84474
specific to pkno	PKH_070540	SICAvar antigen (fragment)					3.22056	8.84244	0	10.6195	7.56235	10.9345
specific to pkno	PKH_020760	SICAvar antigen (fragment)					7.17658	5.03519	0	6.23229	5.94901	9.72616
specific to pkno	PKH_120730	SICAvar antigen (fragment)					12.48	13.0068	0	12.1784	9.6519	2.91595
specific to pkno	PKH_090730	SICAvar antigen (fragment)					4.6875	11.5385	0	8.80682	11.1345	7.91855
specific to pkno	PKH_020770	SICAvar antigen (fragment)					5.73477	12.4402	0	10.8632	10.3175	9.27022
specific to pkno	PKH_090740	SICAvar antigen (fragment)					1.86579	4.99537	0	8.27586	4.82686	5.61167
specific to pkno	PKH_060710	SICAvar antigen (fragment)					9.91637	7.27924	0	11.1111	5.2506	10.1754
specific to pkno	PKH_120800	KIR protein					3.31283	13.19	0	8.56721	10.3125	11.4444
specific to pkno	PKH_120810	hypothetical protein, conserved in P.knowlesi (fragment)					1.28005	0.600655	0	5.92194	10.9453	4.65116
specific to pkno	PKH_080780	SICAvar antigen (fragment)					7.02948	2.2975	0	13.1429	6.60737	11.1628
specific to pkno	PKH_130890	KIR protein					5.61321	10.54	0	9.48795	9.63855	8.73494
specific to pkno	PKH_110960	SICAvar antigen					11.7479	5.28	0	5.02988	7.91833	5.32869
specific to pkno	PKH_141060	SICAvar antigen (fragment)					5.02684	11.6239	0	11.7547	9.69868	6.79542
specific to pkno	PKH_141070	SICAvar antigen					11.0572	3.93258	0	10.4997	9.26446	10.1685
specific to pkno	PKH_051050	KIR protein					7.65	12.8926	0	7.98669	11	11.4907
specific to pkno	PKH_141080	SICAvar antigen (fragment)					2.96981	11.18	0	3.24612	4.58716	1.95804
specific to pkno	PKH_131110	KIR protein					10.4225	13.8937	0	9.27835	8.41924	10.2564
specific to pkno	PKH_091300	SICAvar antigen (fragment)					9.64539	5.18098	0	3.12278	8.84643	4.68417
specific to pkno	PKH_111220	SICAvar antigen					10.3831	5.84	0	8.34613	5.32514	7.18125
specific to pkno	PKH_091310	SICAvar antigen (fragment)					13.51	12.8645	0	8.04795	11.9403	3.27763
specific to pkno	PKH_091320	KIR protein					6.83371	13.7441	0	6.47709	12.1643	10.7098
specific to pkno	PKH_131230	SICAvar antigen					10.7604	3.42092	0	3.66882	10.75	8.72583
specific to pkno	PKH_051250	SICAvar antigen (fragment)					9.90099	6.67	0	10.1053	10.241	0
specific to pkno	PKH_051260	SICAvar antigen (fragment)					4.11552	6.98925	0	10.1613	1.35281	5.25839
specific to pkno	PKH_051270	SICAvar antigen (fragment)					6.58343	1.44412	0	10.6583	10.7034	11.5502
specific to pkno	PKH_011290	SICAvar antigen (fragment)					0.894145	9.39394	0	9.32358	8.89571	7.02179
specific to pkno	PKH_011300	KIR protein					0	13.2509	0	8.12721	11.1601	3.08807
specific to pkno	PKH_061290	KIR protein					12.69	12.92	0	11.1643	6.64273	12.74
specific to pkno	PKH_071200	hypothetical protein, conserved in P.knowlesi					9.40557	9.32	0	4.78	7.5	11.8557
specific to pkno	PKH_051280	SICAvar antigen (fragment)					7.78342	11.4213	0	9.00621	3.67377	6.8323
specific to pkno	PKH_021390	hypothetical protein, conserved in P.knowlesi (fragment)					0.698399	3.88794	0	5.91659	10.6383	3.32248
specific to pkno	PKH_021400	SICAvar antigen (fragment)					14.77	13.4907	0	9.86395	11.2158	7.86119
specific to pkno	PKH_031230	conserved Plasmodium protein, unknown function					4.5	10.1215	0	12.81	6.08	4.84
specific to pkno	PKH_081400	SICAvar-like antigen (fragment)					12.05	12.4789	0	8.75	9.42507	5.86552
specific to pkno	PKH_081410	SICAvar antigen (fragment)					1.92744	9.74026	0	3.80518	6.80851	4.01284
specific to pkno	PKH_141390	KIR protein					5.97152	11.146	0	10.7829	8.63422	10.2201
specific to pkno	PKH_031250	SICAvar antigen (fragment)					12.4417	13.9021	0	4.73934	7.42496	10.1106
specific to pkno	PKH_081420	SICAvar antigen (fragment)					11.1888	5.18639	0	10.7784	10.1796	9.28144
specific to pkno	PKH_051350	KIR protein					3.01314	9.65517	0	11.2644	6.32184	6.19977
specific to pkno	PKH_101340	KIR protein					10.7143	14.5973	0	10.2679	10.231	11.2769
specific to pkno	PKH_101350	SICAvar antigen (fragment)					11.79	10.95	0	8.6747	8.68571	11.79
specific to pkno	PKH_101360	SICAvar antigen (fragment)					8.56269	7.91367	0	10.8852	10.177	5.40216
specific to pkno	PKH_031255	SICAvar antigen (fragment)					4.88889	0	0	10.5572	6.27886	9.44206
specific to pkno	PKH_041560	SICAvar antigen (fragment)			cell differentiation (GO:0030154)	membrane (GO:0016020)	5.0885	10.3362	0	4.73225	8.71731	9.46451
specific to pkno	PKH_101370	SICAvar antigen (fragment)					3.12175	11.1765	0	10.4623	0	4.08
specific to pkno	PKH_041570	SICAvar antigen (fragment)					11.05	5.45	0	6.13383	2.78293	9.60347
specific to pkno	PKH_051440	SICAvar antigen (fragment)					6.70732	14.3288	0	9.47368	12.4431	8.84146
specific to pkno	PKH_051450	SICAvar antigen (fragment)					3.60097	12.8319	0	13.5802	12.2056	6.2986
specific to pkno	PKH_081600	KIR protein					2.43763	11.8565	0	11.7005	2.65211	9.05
specific to pkno	PKH_051540	KIR protein					2.53285	14.1757	0	13.6086	10.9907	3.70112
specific to pkno	PKH_061620	SICAvar antigen (fragment)					11.83	7.54902	0	8.23529	11.6105	8.58369
specific to pkno	PKH_111560	SICAvar antigen					10.7647	5.40201	0	9.10804	8.72567	8.41709
specific to pkno	PKH_111580	SICAvar antigen (fragment)					10.6583	10.5495	0	10.5727	13.1579	10.0642
specific to pkno	PKH_041760	SICAvar antigen (fragment)					9.07317	5.34591	0	7.38994	11.0762	8.49393
specific to pkno	PKH_041770	SICAvar antigen (fragment)					6.83177	0	0	10.9641	13.7432	13.49
specific to pkno	PKH_111590	SICAvar antigen (fragment)					5.71429	13.8365	0	9.79592	0	5.60748
specific to pkno	PKH_081810	SICAvar antigen (fragment)					12.3054	4.33	0	1.89798	10.6168	10.5575
specific to pkno	PKH_081811	SICAvar antigen (fragment)					1.45682	0.368749	0	0	9.58904	0.857909
specific to pkno	PKH_131700	SICAvar antigen (fragment)					3.05657	5.93014	0	9.25373	8.28877	8.84354
specific to pkno	PKH_011780	SICAvar-like antigen					7.32087	8.1448	0	8.44	11.0659	10.4707
specific to pkno	PKH_131715	hypothetical protein, conserved in P.knowlesi (fragment)					0	13.39	0	12.8713	13.75	14.876
specific to pkno	PKH_061840	hypothetical protein, conserved in P.knowlesi					2.46562	3.63263	0	10.6157	5.80709	7.29685
specific to pkno	PKH_011790	SICAvar antigen (fragment)					5.62	11.0733	0	7.32538	7.15503	5.57276
specific to pkno	PKH_091990	SICAvar antigen (fragment)					10.55	8.32	0	6.46865	10.8251	10.5194
specific to pkno	PKH_131720	hypothetical protein, conserved in P.knowlesi					5.41	10.69	0	9.47	7.18	3.70052
specific to pkno	PKH_061850	SICAvar antigen (fragment)					11.1165	7.11	0	1.45228	9.4917	8.35062
specific to pkno	PKH_101750	SICAvar antigen					10.3133	3.89085	0	1.26326	7.57959	7.73118
specific to pkno	PKH_061860	SICAvar antigen (fragment)					1.91643	10.8499	0	3.31815	5.82857	2.97941
specific to pkno	PKH_061870	SICAvar antigen (fragment)					1.76759	5.1832	0	5.17241	4.93179	5.49944
specific to pkno	PKH_051981	SICAvar antigen (fragment)					8.4375	9.69	0	11.2861	0	5.55042
specific to pkno	PKH_131820	SICAvar antigen (fragment)					11.102	3.71	0	2.59901	7.30198	8.25083
specific to pkno	PKH_082030	hypothetical protein, conserved in P.knowlesi					10.6957	8.93119	0	4.47504	10.8434	8.09
specific to pkno	PKH_082051	SICAvar antigen (fragment)					3.40599	2.93233	0	13.5417	4.67532	5.68336
specific to pkno	PKH_031990	KIR protein					9.28463	12.9376	0	7.17557	7.93893	13.55
specific to pkno	PKH_102050	SICAvar antigen (fragment)					2.40385	10.8911	0	8.1042	0	0
specific to pkno	PKH_102060	SICAvar antigen (fragment)					6.49215	8.48485	0	7.49543	9.24242	7.29614
specific to pkno	PKH_111980	SICAvar antigen (fragment)					6.35889	9.26045	0	6.58199	8.08314	12.2018
specific to pkno	PKH_032000	SICAvar antigen (fragment)					8.3996	6.69014	0	10.7784	2.65411	9.67466
specific to pkno	PKH_111990	SICAvar antigen (fragment)					11.9	11.86	0	10.38	8.97803	12.19
specific to pkno	PKH_112000	SICAvar antigen (fragment)					7.47204	5.03	0	3.44507	4.56	9.68635
specific to pkno	PKH_082190	SICAvar antigen (fragment)					0	2.31012	0	9.90712	8.71795	6.39535
specific to pkno	PKH_112010	SICAvar antigen (fragment)					3.90567	4.17277	0	6.79887	9.8	5.55042
specific to pkno	PKH_122440	SICAvar antigen (fragment)					4.91958	9.74729	0	11.2426	10.7784	8.68263
specific to pkno	PKH_082200	SICAvar antigen (fragment)					10.7062	11.2049	0	6.91776	7.07148	5.30361
specific to pkno	PKH_082204	hypothetical protein, conserved in P.knowlesi					0.719189	3.79965	0	2.7366	1.12384	4.45498
specific to pkno	PKH_122450	SICAvar antigen (fragment)		peptidase inhibitor activity (GO:0030414)			10.8082	4.61	0	3.04842	2.69461	9.51
specific to pkno	PKH_122470	SICAvar antigen (fragment)					7.14286	10.1781	0	7.90816	12.7551	7.38699
specific to pkno	PKH_122460	hypothetical protein, conserved in P.knowlesi					10.03	14.65	0	12.89	10.5	12.61
specific to pkno	PKH_142410	SICAvar antigen (fragment)					5.72	11.5331	0	9.59	9.01288	9.01
specific to pkno	PKH_092440	SICAvar antigen (fragment)					12.59	10.83	0	4.01204	8.62588	6.80566
specific to pkno	PKH_072370	SICAvar antigen (fragment)					2.20751	10.7807	0	11.6592	2.46973	4.47761
specific to pkno	PKH_072360	SICAvar antigen (fragment)					11.32	11.23	0	9.93042	3.52832	8.50608
specific to pkno	PKH_132200	KIR protein (fragment)					6.9128	13.5	0	10.3198	10.148	14.3158
specific to pkno	PKH_132190	SICAvar antigen		structural molecule activity (GO:0005198)	cell adhesion (GO:0007155)	actin cytoskeleton (GO:0015629)	11.8332	3.77358	0	2.54972	7.54717	10.7987
specific to pkno	PKH_072380	SICAvar antigen (fragment)					9.01526	10.729	0	4.85437	10.7884	7.16349
specific to pkno	PKH_092449	hypothetical protein, conserved in P.knowlesi					9.2	0	0	5.10033	11.5108	3.33151
specific to pkno	PKH_132220	KIR protein					6.03411	12.0339	0	8.61486	12.8378	8.46024
specific to pkno	PKH_132210	SICAvar antigen (fragment)					11.78	7.75	0	3.87597	11.3953	10.2637
specific to pkno	PKH_082320	KIR protein					5.69736	12.2222	0	8.95361	10.3668	3.08383
specific to pkno	PKH_072450	SICAvar antigen					10.5596	4.12716	0	5.07812	9.20759	10.039
specific to pkno	PKH_142570	SICAvar antigen (fragment)					10.4096	4.21	0	8.26492	10.765	9.09091
specific to pkno	PKH_052570	SICAvar antigen					10.5905	5.54	0	8.85609	9.84615	10.0061
specific to pkno	PKH_112420	KIR protein					6.74279	13.2075	0	9.98279	11.704	9.42149
specific to pkno	PKH_082510	SICAvar antigen (fragment)					11.3846	5.62324	0	10.8626	4.79233	4.43276
specific to pkno	PKH_072690	SICAvar antigen (fragment)					0	5.23303	0	8.70712	3.20442	12.9231
specific to pkno	PKH_072710	SICAvar antigen (fragment)					11.0895	4.79007	0	3.25059	3.31165	9.58013
specific to pkno	PKH_072720	KIR protein					11.38	14.8148	0	6.39731	5.66606	9.59596
specific to pkno	PKH_052810	205 kda pk1(b )1 sicavar antigen (fragment)					0.659898	7.86517	0	13.8393	1.08597	1.80353
specific to pkno	PKH_092930	SICAvar antigen (fragment)					8.29673	8.37	0	6.18459	0	0
specific to pkno	PKH_092940	SICAvar antigen (fragment)					12.8302	9.59596	0	12.6263	10.6785	10.4888
specific to pkno	PKH_082760	SICAvar antigen (fragment)					6.974	10.951	0	12.1655	6.70671	13.3531
specific to pkno	PKH_082520	SICAvar antigen (fragment)					11.0895	5.44	0	11.4555	10.2748	9.97015
specific to pkno	PKH_052830	SICAvar antigen (fragment)					10.42	13.44	0	9.52839	10.2733	12.4
specific to pkno	PKH_102950	SICAvar antigen (fragment)					1.1154	8.62884	0	0	3.30159	2.53492
specific to pkno	PKH_102960	SICAvar antigen (fragment)					10.2356	11.1457	0	11.2104	5.12195	7.72358
specific to pkno	PKH_082890	SICAvar antigen (fragment)					11.99	12.3103	0	11.32	11.1111	9.63
specific to pkno	PKH_142960	SICAvar antigen (fragment)					13.15	12.01	0	11.89	11.3101	14.19
specific to pkno	PKH_093160	SICAvar antigen (fragment)					5.02152	4.27764	0	8.65533	9.42029	2.41423
specific to pkno	PKH_143040	SICAvar antigen (fragment)					7.46753	3.65854	0	3.1591	0	4.02145
specific to pkno	PKH_093170	SICAvar antigen					11.83	4.28652	0	12.3241	10.9736	9.64467
specific to pkno	PKH_143050	KIR protein					5.94976	10.43	0	8.22785	13	9.49367
specific to pkno	PKH_112900	SICAvar antigen					11.291	3.29274	0	1.5336	4.69102	9.51307
specific to pkno	PKH_123620	KIR protein					11.236	12.3397	0	5.77849	8.02568	9.81912
specific to pkno	PKH_073450	SICAvar antigen (fragment)					8.44314	7.14	0	8.46473	7.81318	4.89627
specific to pkno	PKH_123610	SICAvar antigen					10.1951	4.62754	0	2.82008	9.08065	9.7973
specific to pkno	PKH_123760	KIR protein					5.8296	12.86	0	3.58744	10.3139	10.1644
specific to pkno	PKH_133325	SICAvar antigen (fragment)					8.64	0.949367	0	14.4033	3.9019	3.14557
specific to pkno	PKH_133330	SICAvar antigen (fragment)					9.54301	6.72043	0	8.60215	11.828	0
specific to pkno	PKH_083490	SICAvar antigen (fragment)					4.09357	4.84713	0	12.4706	13.4557	8.96657
specific to pkno	PKH_083491	hypothetical protein, conserved in P.knowlesi (fragment)		ATP binding (GO:0005524)	transport (GO:0006810)	integral to membrane (GO:0016021)	8.87	0	0	4.92611	2.73292	3.3419
specific to pkno	PKH_083500	SICAvar antigen (fragment)					9.32897	2.43119	0	10.7266	13.4948	13.4948
specific to pkno	PKH_133350	SICAvar antigen (fragment)					9.14286	10.496	0	8.01144	10.0143	11.869
specific to pkno	PKH_113730	SICAvar antigen (fragment)					10.9922	5.84	0	5.30393	10.1311	10.1907
specific to pkno	PKH_113750	KIR protein					4.95	13.4812	0	12.116	12.5637	6.40871
specific to pkno	PKH_113760	SICAvar antigen (fragment)					9.8	8.95	0	5.32095	8.86824	7.26351
specific to pkno	PKH_094010	SICAvar antigen					10.6597	3.56083	0	2.57171	9.44609	7.90977
specific to pkno	PKH_124340	SICAvar antigen (fragment)					4.74777	9.33	0	12.7273	9.97151	13.3333
specific to pkno	PKH_144180	KIR protein					7.41	13.0178	0	9.33333	6.09212	9.21248
specific to pkno	PKH_124350	SICAvar antigen (fragment)					0	10.67	0	12.53	3.32512	9.02062
specific to pkno	PKH_124370	SICAvar antigen (fragment)					0	2.33945	0	13.0282	9.28726	7.45614
specific to pkno	PKH_113930	SICAvar antigen (fragment)					11.85	6.92974	0	5.10106	11.7308	10.4909
specific to pkno	PKH_113950	SICAvar antigen (fragment)					7.1953	5.09506	0	9.73054	11.1888	1.86375
specific to pkno	PKH_094230	SICAvar antigen					12.2201	7.23	0	6.93302	9.4539	9.28865
specific to pkno	PKH_094560	hypothetical protein, conserved in P.knowlesi					4.46255	10.8844	0	7.76627	11.0733	7.91912
specific to pkno	PKH_114370	SICAvar antigen (fragment)					11.2527	3.98628	0	10.3376	7.87234	12.7389
specific to pkno	PKH_094585	hypothetical protein, conserved in P.knowlesi (fragment)					4.5929	2.66525	0	6.18557	5.92	5.80986
specific to pkno	PKH_114360	SICAvar antigen (fragment)					12.96	8.46	0	11.9968	12.1383	10.6353
specific to pkno	PKH_094590	SICAvar antigen (fragment)					9.98	14.46	0	12.85	9.38166	10.84
specific to pkno	PKH_125080	SICAvar antigen (fragment)					3.698	3.40376	0	12.5448	4.79798	5.50796
specific to pkno	PKH_114560	SICAvar antigen (fragment)					11.7647	0.751542	0	0	6.53266	12.6471
specific to pkno	PKH_114570	SICAvar antigen (fragment)					14.4	11.3903	0	8.54947	8.6629	6.15165
specific to pkno	PKH_125090	SICAvar antigen (fragment)					11.9941	4.05882	0	9.82353	10.5882	10.6471
specific to pkno	PKH_144880	SICAvar antigen					10.8213	3.68315	0	1.05954	9.43491	9.73764
specific to pkno	PKH_145240	hypothetical protein, conserved in P.knowlesi					0.765803	11.8687	0	7.66423	8.28313	0
specific to pkno	PKH_114910	SICAvar antigen (fragment)					7.91	14.94	0	11.42	10.9331	7.73869
specific to pkno	PKH_145260	SICAvar antigen (fragment)					6.26168	4.39024	0	7.23982	4.49438	2.84006
specific to pkno	PKH_145250	SICAvar antigen (fragment)					9.31253	8.54	0	7.7135	5.16529	10.631
specific to pkno	PKH_145290	SICAvar antigen (fragment)					14.04	11.3734	0	10.34	11.03	12.43
specific to pkno	PKH_145735	KIR protein					10	14.4231	0	10.4663	7.21154	10.0478
specific to pkno	PKH_145870	SICAvar antigen (fragment)					3.3033	9.70297	0	0	11.7271	3.97059
specific to pkno	PKH_145880	KIR protein					10.8896	13.4812	0	10.4567	8.34028	10.2389
specific to pkno	PKH_146170	SICAvar antigen (fragment)					12.439	3.86448	0	7.62195	7.81893	6.40244
specific to pkno	PKH_146740	SICAvar antigen (fragment)					1.8412	1.31783	0	5.15298	13.9037	5.38058
specific to pkno	PKH_146730	KIR protein					5.17567	14.376	0	12.8931	7.20961	10.0223
specific to pkno	PKH_146750	KIR protein					9.74	10.1852	0	11.73	8.34621	10.82
specific to pyoe	PY05009	hypothetical protein					0	0	0	41.38	44.83	0
specific to pyoe	PY00865	hypothetical protein					1.11223	0	0	52	76.92	0
specific to pyoe	PY07503	hypothetical protein					0	0	0.347567	69.44	72.22	0
specific to pyoe	PY00307	hypothetical protein					14.55	13.31	6.83311	40.37	45.97	0
specific to pyoe	PY01915	hypothetical protein					0.874751	4.53686	0.72314	79.78	79.78	0
specific to pyoe	PY07663	hypothetical protein					0.799017	2.61569	2.9724	100	100	0
specific to pyoe	PY07350	hypothetical protein					13.11	9.12	11.21	49.09	52.69	0
specific to pyoe	PY07612	hypothetical protein					0	0	1.67464	48.15	82.14	0
specific to pyoe	PY07821	hypothetical protein		protein binding (GO:0005515)	vesicle-mediated transport (GO:0016192)	membrane (GO:0016020)	11.96	10.59	6.5703	41.67	42.62	0
specific to pyoe	PY03763	hypothetical protein					3.62191	1.59574	3.65449	46.86	62.43	0
specific to pyoe	PY06986	hypothetical protein					3.52761	9.73872	4.46781	72.85	70.2	0
specific to pyoe	PY07366	hypothetical protein					4.48776	10.9	0	59.75	79.87	0
specific to pyoe	PY07585	hypothetical protein					4.22535	0.603136	11.6279	97.96	97.96	0
specific to pyoe	PY01082	hypothetical protein					0	0	0	61.54	73.08	0
specific to pyoe	PY07852	hypothetical protein					0	0	0	75	91.67	0
specific to pyoe	PY05546	hypothetical protein					5.33981	3.00429	3.22581	51.67	54.55	0
specific to pyoe	PY06629	hypothetical protein					0.263288	0	0.24837	46.3	49.06	0
specific to pyoe	PY07853	hypothetical protein					0	0	0	95.45	100	0
specific to pyoe	PY02669	hypothetical protein					0	0	0	68.18	81.82	0
specific to pyoe	PY06646	hypothetical protein					0	0	0	76.47	51.72	0
specific to pyoe	PY07664	hypothetical protein					4.22535	0.643345	10.8527	97.96	97.96	0
specific to pyoe	PY06846	hypothetical protein					0	6.61765	4.27807	88.89	100	0
specific to pyoe	PY07673	hypothetical protein					11	0	5.76923	45.83	44.05	0
specific to pyoe	PY05973	hypothetical protein					13.91	0.426945	3.57724	56.34	58.57	0
specific to pyoe	PY07586	hypothetical protein					1.14869	0.804182	0.531915	93.88	95.92	0
specific to pyoe	PY01411	hypothetical protein					0	0.326264	0.465116	100	100	0
specific to pyoe	PY03291	hypothetical protein					14.86	4.22535	2.51497	75.36	63.24	0
specific to pyoe	PY07854	hypothetical protein					0.614628	2.8169	0	91.84	93.88	0
specific to pyoe	PY02539	hypothetical protein					12.74	5.02934	11.11	54.79	62.5	0
specific to pyoe	PY06633	hypothetical protein					0	0	2.95931	40.54	44.086	0
specific to pyoe	PY06187	hypothetical protein					4.83	0	0	61.54	71.79	0
specific to pyoe	PY07565	hypothetical protein					0	0	0	72	80	0
specific to pyoe	PY02215	hypothetical protein					13.2898	4.54545	12.6761	43.16	55.09	0
specific to pyoe	PY04972	hypothetical protein					13.1004	11	9.10747	41.5808	54.3	0
specific to pyoe	PY01976	hypothetical protein					0	2.76873	0	40.62	55.56	0
specific to pyoe	PY05134	hypothetical protein					4.60526	3.28228	0	51.35	59.46	0
specific to pyoe	PY07408	hypothetical protein					14.5	1.85128	11.9	43.12	60.57	0
specific to pyoe	PY07587	hypothetical protein					0.676091	0.603136	2.9724	97.96	100	0
specific to pyoe	PY05007	hypothetical protein					1.38272	6.47321	2.43112	53.62	73.28	0
specific to pyoe	PY06581	hypothetical protein					13.76	13.48	8.69	51.26	55.92	0
specific to pyoe	PY04115	hypothetical protein					0	0	0	73.33	48.15	0
specific to pyoe	PY00369	hypothetical protein					9.64	2.00818	6.17608	43.65	49.27	0
specific to pyoe	PY02361	hypothetical protein					0	0	0	65.38	76.92	0
specific to pyoe	PY07552	hypothetical protein					3.40909	2.61569	0.83045	85	90	0
specific to pyoe	PY05104	hypothetical protein					0	2.35988	0.259933	56.67	82.76	0
specific to pyoe	PY06262	hypothetical protein					14.98	2.7307	9.1222	49.45	53.73	0
specific to pyoe	PY00937	hypothetical protein					4.15094	0	0	82.86	94.29	0
specific to pyoe	PY06996	hypothetical protein					0.917431	0	0	46.1538	62.5	0
specific to pyoe	PY07214	hypothetical protein					12.0536	11.2871	6.30885	60.2	63.02	0
specific to pyoe	PY03757	hypothetical protein					14.23	1.62198	3.74833	50	70.24	0
specific to pyoe	PY02810	hypothetical protein					0	0	0	44.83	60.87	0
specific to pyoe	PY03827	hypothetical protein					0	0	0	40.74	40.74	0
specific to pyoe	PY07588	hypothetical protein					0	3.42052	0.946372	91.84	93.88	0
specific to pyoe	PY06860	hypothetical protein					4.60358	0.889097	2.4	45.61	49.02	0
specific to pyoe	PY07553	hypothetical protein					3.05164	0.603136	3.18471	95.92	95.92	0
specific to pyoe	PY07589	hypothetical protein					2.68595	10.8527	11.6279	93.88	93.88	0
specific to pyoe	PY06005	hypothetical protein					12	5.28846	5.5355	46.02	65	0
specific to pyoe	PY07554	hypothetical protein					0	0	0	68.18	70.45	0
specific to pyoe	PY03200	hypothetical protein					7.82	11.5456	11.3594	43.2	57.54	0
specific to pyoe	PY00845	hypothetical protein					4.33884	1.24896	6.11354	48.48	54.55	0
specific to pyoe	PY03430	hypothetical protein					13.19	7.13324	12.69	51.92	54.05	0
specific to pyoe	PY02012	hypothetical protein					0	2.05047	0	50	61.29	0
specific to pyoe	PY06033	hypothetical protein					0	12.037	12.2642	40.74	40.74	0
specific to pyoe	PY06669	hypothetical protein					0	0	0	70	70	0
specific to pyoe	PY04578	hypothetical protein					0	0	0	41.03	71.4286	0
specific to pyoe	PY05404	hypothetical protein					2.18659	0.798655	1.04167	59.02	51.72	0
specific to pyoe	PY07590	hypothetical protein					0	2.24719	2.35294	89.66	93.1	0
specific to pyoe	PY07603	hypothetical protein					0	0	0	96.77	93.55	0
specific to pyoe	PY05374	hypothetical protein					0	0	0	54.55	88.24	0
specific to pyoe	PY01889	hypothetical protein					0	0	0	83.33	62.79	0
specific to pyoe	PY07856	hypothetical protein					2.11538	2.21328	2.54777	89.66	89.66	0
specific to pyoe	PY00440	hypothetical protein					2.90698	3.13589	0.232897	48.48	41.79	0
specific to pyoe	PY07604	hypothetical protein					2.94118	2.87611	1.43443	92.5	100	0
specific to pyoe	PY07555	hypothetical protein					4.22535	0.298063	2.33546	93.1	96.55	0
specific to pyoe	PY01603	hypothetical protein					0	0	0	63.64	60.61	0
specific to pyoe	PY07591	hypothetical protein					0	0	0	83.33	87.5	0
specific to pyoe	PY04522	hypothetical protein					0.490046	0	0.86741	70.45	70.45	0
specific to pyoe	PY06436	hypothetical protein					1.51515	0	0	87.5	93.75	0
specific to pyoe	PY05042	hypothetical protein					0	0	0	50	65.38	0
specific to pyoe	PY07377	hypothetical protein					3.80165	2.40427	0.797679	63.64	80.81	0
specific to pyoe	PY04258	hypothetical protein					13.8528	1.77819	2.17634	48.43	49.06	0
specific to pyoe	PY07367	hypothetical protein					3.12204	10.8527	9.40594	45.88	63.09	0
specific to pyoe	PY03925	hypothetical protein					0	0	0	57.69	57.69	0
specific to pyoe	PY07846	hypothetical protein					0.983405	0.683554	1.12508	88.14	94.92	0
specific to pyoe	PY01767	hypothetical protein					3.52564	0.811993	0	63.64	72.73	0
specific to pyoe	PY05300	hypothetical protein					0	0	0	63.64	60.61	0
specific to pyoe	PY07857	hypothetical protein					0	0.793167	2.48834	89.8	91.84	0
specific to pyoe	PY07234	hypothetical protein					3.61174	3.61174	3.61174	50	73.33	0
specific to pyoe	PY07556	hypothetical protein					1.25523	0.562927	3.41686	91.84	91.84	0
specific to pyoe	PY06582	hypothetical protein					1.91571	2.3569	0	54.29	50	0
specific to pyoe	PY01210	hypothetical protein					0	0	0	86.36	81.82	0
specific to pyoe	PY07247	hypothetical protein					3.63	0	0	48.89	59.09	0
specific to pyoe	PY06236	hypothetical protein					0	0	0	85.71	85.71	0
[truncated: 262 more rows]
