# Supplementary material for: Genome Comparison of Human and Non-Human Malaria Parasites Reveals Species Subset-Specific Genes Potentially Linked to Human Disease
Source: PLoS Comput Biol. 2011 Dec 22;7(12):e1002320. doi: 10.1371/journal.pcbi.1002320 (PMC3245289; doi:10.1371/journal.pcbi.1002320)
Supplement: Table S9 — Genes conserved in primate parasites but absent in rodent parasites. Same genes as in Table 1 but including graphical RNA-seq expression profiles. (PDF) [file pcbi.1002320.s018.pdf]

**Table S9: Genes conserved in primate parasites but absent in rodent parasites.**

| PfGene<br>(PvPID/OG)     | Product                                        | RNA-seq<br>expr. (IDC)                                                              | Protein<br>expr.      | GO<br>biological process           | Additional information                             |
|--------------------------|------------------------------------------------|-------------------------------------------------------------------------------------|-----------------------|------------------------------------|----------------------------------------------------|
| MAL13P1.214<br>(64/VIRI) | phosphoethanolamine<br>N-methyltransferase     | 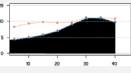   | MZ;GC;SC;<br>SZ;RU;TZ | Phosphatidylcholine biosynth. pr.  | methionine and<br>polyamine metabolism             |
| MAL8P1.202<br>(53/ALVE)  | apicoplast phosphate-<br>idic acid phosphatase | 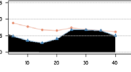   | -                     | -                                  | dolichol metabolism; SP                            |
| PF14_0565<br>(44/----)   | unknown function                               | 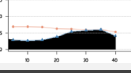   | MZ                    | -                                  | WD40 repeat-like                                   |
| PF14_0036<br>(69/ALVE)   | acid phosphatase,<br>putative                  | 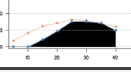   | MZ;GC;SC;<br>TZ;RU    | -                                  | hydrolase activity                                 |
| PF11_0186<br>(65/----)   | unknown function                               | 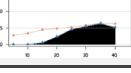   | GC;SZ                 | -                                  | -                                                  |
| PF14_0662<br>(50/ALVE)   | nucleoside<br>transporter, putative            | 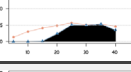   | -                     | -                                  | nucleoside transmem-<br>brane transporter          |
| PFF0680c<br>(40/FIRM)    | thiamin-phosphate<br>pyrophosphorylase         | 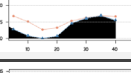   | MZ                    | thiamine bio-<br>synthetic process | -                                                  |
| PFE1030c<br>(67/PROT)    | phosphomethylpyrimi-<br>dine kinase, putative  | 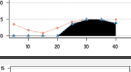  | SC;SZ;<br>RU          | thiamine bio-<br>synthetic process | -                                                  |
| PFL1920c<br>(76/FIRM)    | hydroxyethylthiazole<br>kinase, putative       | 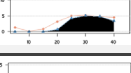 | MZ;GC;TZ;<br>SC;RU    | thiamine bio-<br>synthetic process | -                                                  |
| MAL7P1.339<br>(46/ALVE)  | Ca++ chelating serine<br>protease, putative    | 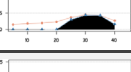 | -                     | -                                  | SCP/Tpx-1/Ag5/PR-1/Sc7<br>family; SP               |
| PFI0405w<br>(46/----)    | unknown function                               | 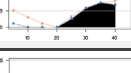 | -                     | -                                  | 1 TM; AP                                           |
| MAL8P1.111<br>(42/ALVE)  | JmjC domain<br>containing protein              | 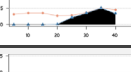 | GC                    | -                                  | [Histone H3]-lysine-36<br>demethylase              |
| PFL2255w<br>(69/ALVE)    | unknown function                               | 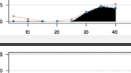 | -                     | ubiquitin cycle                    | -                                                  |
| PFL1840w<br>(66/ALVE)    | unknown function                               | 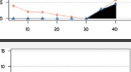 | GC;SZ                 | -                                  | SP; 4 TM; COPI associated                          |
| PFL0305c<br>(85/ALVE)    | IMP-specific 5'-<br>nucleotidase, putative     | 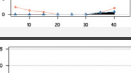 | GC;<br>oocyst SZ      | nucleotide<br>metabolic process    | magnesium ion binding;<br>phosphatase activity     |
| PFI1220w<br>(47/ALVE)    | unknown function                               | 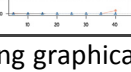 | -                     | -                                  | acyl-CoA N-acyltransfer-<br>ase; upregul. in GC/SZ |

Same genes as in Table 1 but including graphical RNA-seq expression profiles taken from PlasmoDB 7.1. RNA-seq expression values represent scaled expression values from the intraerythrocytic developmental cycle (IDC) as reported by Bartfai R *et al.* (2010). Diagram tick marks represent hours post infection along the x-axis (10, 20, 30, and 40 h post infection) and normalized coverage (log2) on the y-axis. For remaining legend please refer to legend of Table 1.
